# Supplementary material for: Functional Metabolomics Describes the Yeast Biosynthetic Regulome
Source: PubMed Central journal article supplement (PMC5055083; doi:10.1016/j.cell.2016.09.007), 2016-10-06
Supplement: mmc2.pdf [file mmc2.pdf]

**Table S2. Transcriptional Regulators, Kinases and Phosphatases that Affect Amino Acid Metabolism. Related to Figure 3 B-C.**

| <b>amino acid</b> | <b>transcriptional regulator<br/>(number)</b>                                    | <b>kinase<br/>(number)</b>                                                                       | <b>phosphatase<br/>(number)</b> | <b>total<br/>No</b> |
|-------------------|----------------------------------------------------------------------------------|--------------------------------------------------------------------------------------------------|---------------------------------|---------------------|
| alanine           | <i>ADA2 GAT1 GCR2 HAP5 HMO1<br/>HOT1 LEU3 MOT2 RGT1 SPT10<br/>USV1 YRR1 (12)</i> | <i>ADK1 BUB1 CLB2 DBF2 ELM1<br/>FAB1 GIN4 MCK1 PCL7<br/>PHO80 PHO85 SKY1 TCO89<br/>VIP1 (14)</i> | <i>OCA1 PTC6<br/>SAP155 (3)</i> | 29                  |
| aspartate         | <i>HAP5 HIR2 IXR1 MOT2 SIR3<br/>SPT10 UME6 XBP1 (8)</i>                          | <i>MCK1 PHO80 SCH9 SLT2 SPS1<br/>VIP1 (6)</i>                                                    | <i>OCA1 PTC1<br/>SIT4 (3)</i>   | 17                  |
| glutamate         | <i>GCR2 GLN3 NRG1 RGT1 SPT10<br/>YRR1 (6)</i>                                    | <i>ADK1 DBF2 ELM1 FAB1 KIN4<br/>MRK1 NPR1 SKM1 (8)</i>                                           | <i>OCA1 SAP155<br/>SIT4 (3)</i> | 17                  |
| phenylalanine     | <i>SPT10 YRR1 (2)</i>                                                            | <i>CTK3 PHO85 VIP1 (3)</i>                                                                       | <i>SIT4 (1)</i>                 | 6                   |
| glycine           | <i>SKO1 SNF2 SOK2 TYE7 YRR1 (5)</i>                                              | <i>FRK1 PHO80 SSN3 (3)</i>                                                                       | <i>OCA1 (1)</i>                 | 9                   |
| histidine         | <i>PHO2 YRR1 (2)</i>                                                             | <i>CGI121 FAB1 SSN8 TCO89 (4)</i>                                                                | <i>SIT4 (1)</i>                 | 7                   |
| isoleucine        | <i>AFT1 SFL1 SPT10 SWI6 YRR1 (5)</i>                                             | <i>YGK3 (1)</i>                                                                                  | <i>OCA1 PTC6 (2)</i>            | 8                   |
| lysine            | <i>ADA2 CIN5 HIR2 LYS14 PHO2<br/>SFL1 SFP1 SIR2 SNF2 ZAP1 (10)</i>               | <i>ADK1 MRK1 PHO85 SSN8 (4)</i>                                                                  | <i>OCA1 SIT4 (2)</i>            | 16                  |
| leucine           | <i>YRR1 (1)</i>                                                                  |                                                                                                  |                                 | 1                   |
| methionine        | <i>AFT1 MIG1 MOT2 SFP1 SPT10<br/>YRR1 (6)</i>                                    | <i>ADK1 (1)</i>                                                                                  | <i>SIT4 (1)</i>                 | 8                   |
| asparagine        | <i>CIN5 GLN3 HAP2 HAP5 LYS14<br/>SFP1 UME6 YRR1 (8)</i>                          | <i>ADK1 CKA2 FAB1 SCH9<br/>TCO89 YCK3 (6)</i>                                                    |                                 | 14                  |
| proline           | <i>AFT1 GCR2 GLN3 HMO1 LEU3<br/>LYS14 SPT10 SWI6 (8)</i>                         | <i>ADK1 CKA2 CTK3 FAB1 NPR1<br/>PHO85 SCH9 (7)</i>                                               | <i>OCA1 SAP155<br/>(2)</i>      | 17                  |
| glutamine         | <i>ADA2 GLN3 HAP2 HAP5 LEU3<br/>SWI6 YRR1 (7)</i>                                | <i>CKA2 PHO85 SCH9 (3)</i>                                                                       | <i>OCA1 PTC1 (2)</i>            | 12                  |
| arginine          | <i>AFT1 ARG81 DOT6 LEU3 LYS14<br/>PHO2 SWI6 (7)</i>                              | <i>CGI121 MCK1 NPR1 PBS2<br/>SCH9 (5)</i>                                                        | <i>SIT4 (1)</i>                 | 13                  |
| serine            | <i>CHA4 HMO1 IXR1 LEU3 LYS14<br/>RPH1 SKO1 SNF2 SPT2 USV1<br/>YRR1 (11)</i>      | <i>ADK1 ELM1 FAB1 PCL1 PCL5<br/>PHO80 PRO1 SKY1 SSN3<br/>TCO89 (10)</i>                          | <i>OCA1 PTC1 (2)</i>            | 23                  |
| threonine         | <i>ADR1 DAL81 GZF3 HOT1 SIR2<br/>SNF2 SPT10 UME6 YRR1 (9)</i>                    | <i>ADK1 CKA2 CTK3 FAB1<br/>PHO80 YGK3 (6)</i>                                                    | <i>PTC1 SAP4 (2)</i>            | 17                  |
| valine            | <i>AFT1 AFT2 DAL81 LEU3 SNF2<br/>SPT10 (6)</i>                                   | <i>FAB1 FRK1 PKH2 PRO1<br/>TCO89 (5)</i>                                                         | <i>OCA1 PTC1<br/>PTC6 (3)</i>   | 14                  |
| tryptophan        | <i>GCN4 LYS14 SUM1 YRR1 (4)</i>                                                  | <i>VIP1 (1)</i>                                                                                  |                                 | 5                   |
| tyrosine          | <i>AFT1 ASH1 LEU3 LYS14 MAC1<br/>MOT2 PHO2 SNF2 SPT10 SUM1<br/>ZAP1 (11)</i>     | <i>ADK1 PBS2 PHO85 PRO1<br/>SSN8 TCO89 VIP1 (7)</i>                                              | <i>OCA1 PTC1<br/>SIT4 (3)</i>   | 21                  |

**Table S4. Assignment of strains to batches. Related to STAR Methods.**

| batch 1 | batch 2 | batch 3 | batch 4 | batch 5 | batch 6 | batch 7 | batch 8 | batch 9 | batch 10 | batch 11 |
|---------|---------|---------|---------|---------|---------|---------|---------|---------|----------|----------|
| 43      | 23      | 16      | 38      | 25      | 13      | 21      | 27      | 17      | 32       | 26       |
| 28      | 7       | 31      | 20      | 5       | 9       | 36      | 8       | 14      | 42       | 4        |
| 41      | 1       | 37      | 11      | 12      | 29      | 19      | 10      | 18      | 34       | 30       |
| 15      | 44      | 24      | 22      | 6       | 40      | 3       | 35      | 2       | 33       | 39       |
|         |         | B       | C       | 47      | 45      | G       | E       | D       | A        | 46       |
|         |         | 49      | 74      | 71&F    | 70      | 72      | 48      | 50      | 51&73    | 75       |

**Table S5. Details for the analytical method to determine amino acids levels by LC-MS/MS; SRM transitions. Related to STAR Methods.**

| amino acid    | compound abbreviation | SRM transition | fragmentor (V) | collision energy (V) | retention time (min) | external calibration |
|---------------|-----------------------|----------------|----------------|----------------------|----------------------|----------------------|
| alanine       | A                     | 90 > 44.1      | 50             | 8                    | 1.87                 | linear               |
| arginine      | R                     | 175.1 > 70     | 100            | 15                   | 2.37                 | power                |
| asparagine    | N                     | 133.1 > 74     | 80             | 9                    | 2.12                 | linear               |
| aspartate     | D                     | 134.1 > 74     | 80             | 10                   | 2.24                 | linear               |
| glutamate     | E                     | 148.1 > 84.1   | 75             | 10                   | 2.09                 | power                |
| glutamine     | Q                     | 147.1 > 84     | 50             | 16                   | 2.07                 | power                |
| glycine       | G                     | 76 > 30.1      | 50             | 5                    | 1.98                 | linear               |
| histidine     | H                     | 156.1 > 110.2  | 80             | 12                   | 2.36                 | power                |
| isoleucine    | I                     | 132.1 > 86     | 80             | 8                    | 1.33                 | power                |
| leucine       | L                     | 132.1 > 86     | 80             | 8                    | 1.24                 | power                |
| lysine        | K                     | 147.1 > 84     | 50             | 16                   | 2.41                 | power                |
| methionine    | M                     | 150.1 > 104    | 40             | 8                    | 1.47                 | linear               |
| phenylalanine | F                     | 166.1 > 120    | 100            | 9                    | 1.23                 | power                |
| proline       | P                     | 116.1 > 70.1   | 100            | 13                   | 1.60                 | power                |
| serine        | S                     | 106 > 60       | 40             | 9                    | 2.10                 | power                |
| threonine     | T                     | 120.1 > 74     | 80             | 9                    | 1.96                 | power                |
| tryptophane   | W                     | 205.1 > 188    | 85             | 5                    | 1.29                 | linear               |
| tyrosine      | Y                     | 182 > 165      | 90             | 5                    | 1.64                 | power                |
| valine        | V                     | 118.1 > 71.9   | 100            | 10                   | 1.57                 | power                |
