# Supplementary material for: Functional Metabolomics Describes the Yeast Biosynthetic Regulome
Source: PubMed Central journal article supplement (PMC5055083; doi:10.1016/j.cell.2016.09.007), 2016-10-06
Supplement: mmc4.pdf [file mmc4.pdf]

# Association of deletion strains by co-clustering

page 2 - 48:      **Mapping the rapamycin- and cycloheximide-induced amino acid profile with that of the knock out collection**

hierarchical-clustering of all deletion strains with wt samples treated with 50 nM rapamycin or 890 nM cycloheximide

distance matrix: pairwise Mahalanobis distance

agglomeration method: Ward's method

page 49 - 95:      **280 similarity clusters informative of gene function**

consensus-clustering of all deletion strains

optimal number of 280 clusters were identified using the adaptive branch pruning algorithm in the dynamicTreeCut package in R.

# Mapping the rapamycin- and cycloheximide-induced amino acid profile with that of the knock out collection

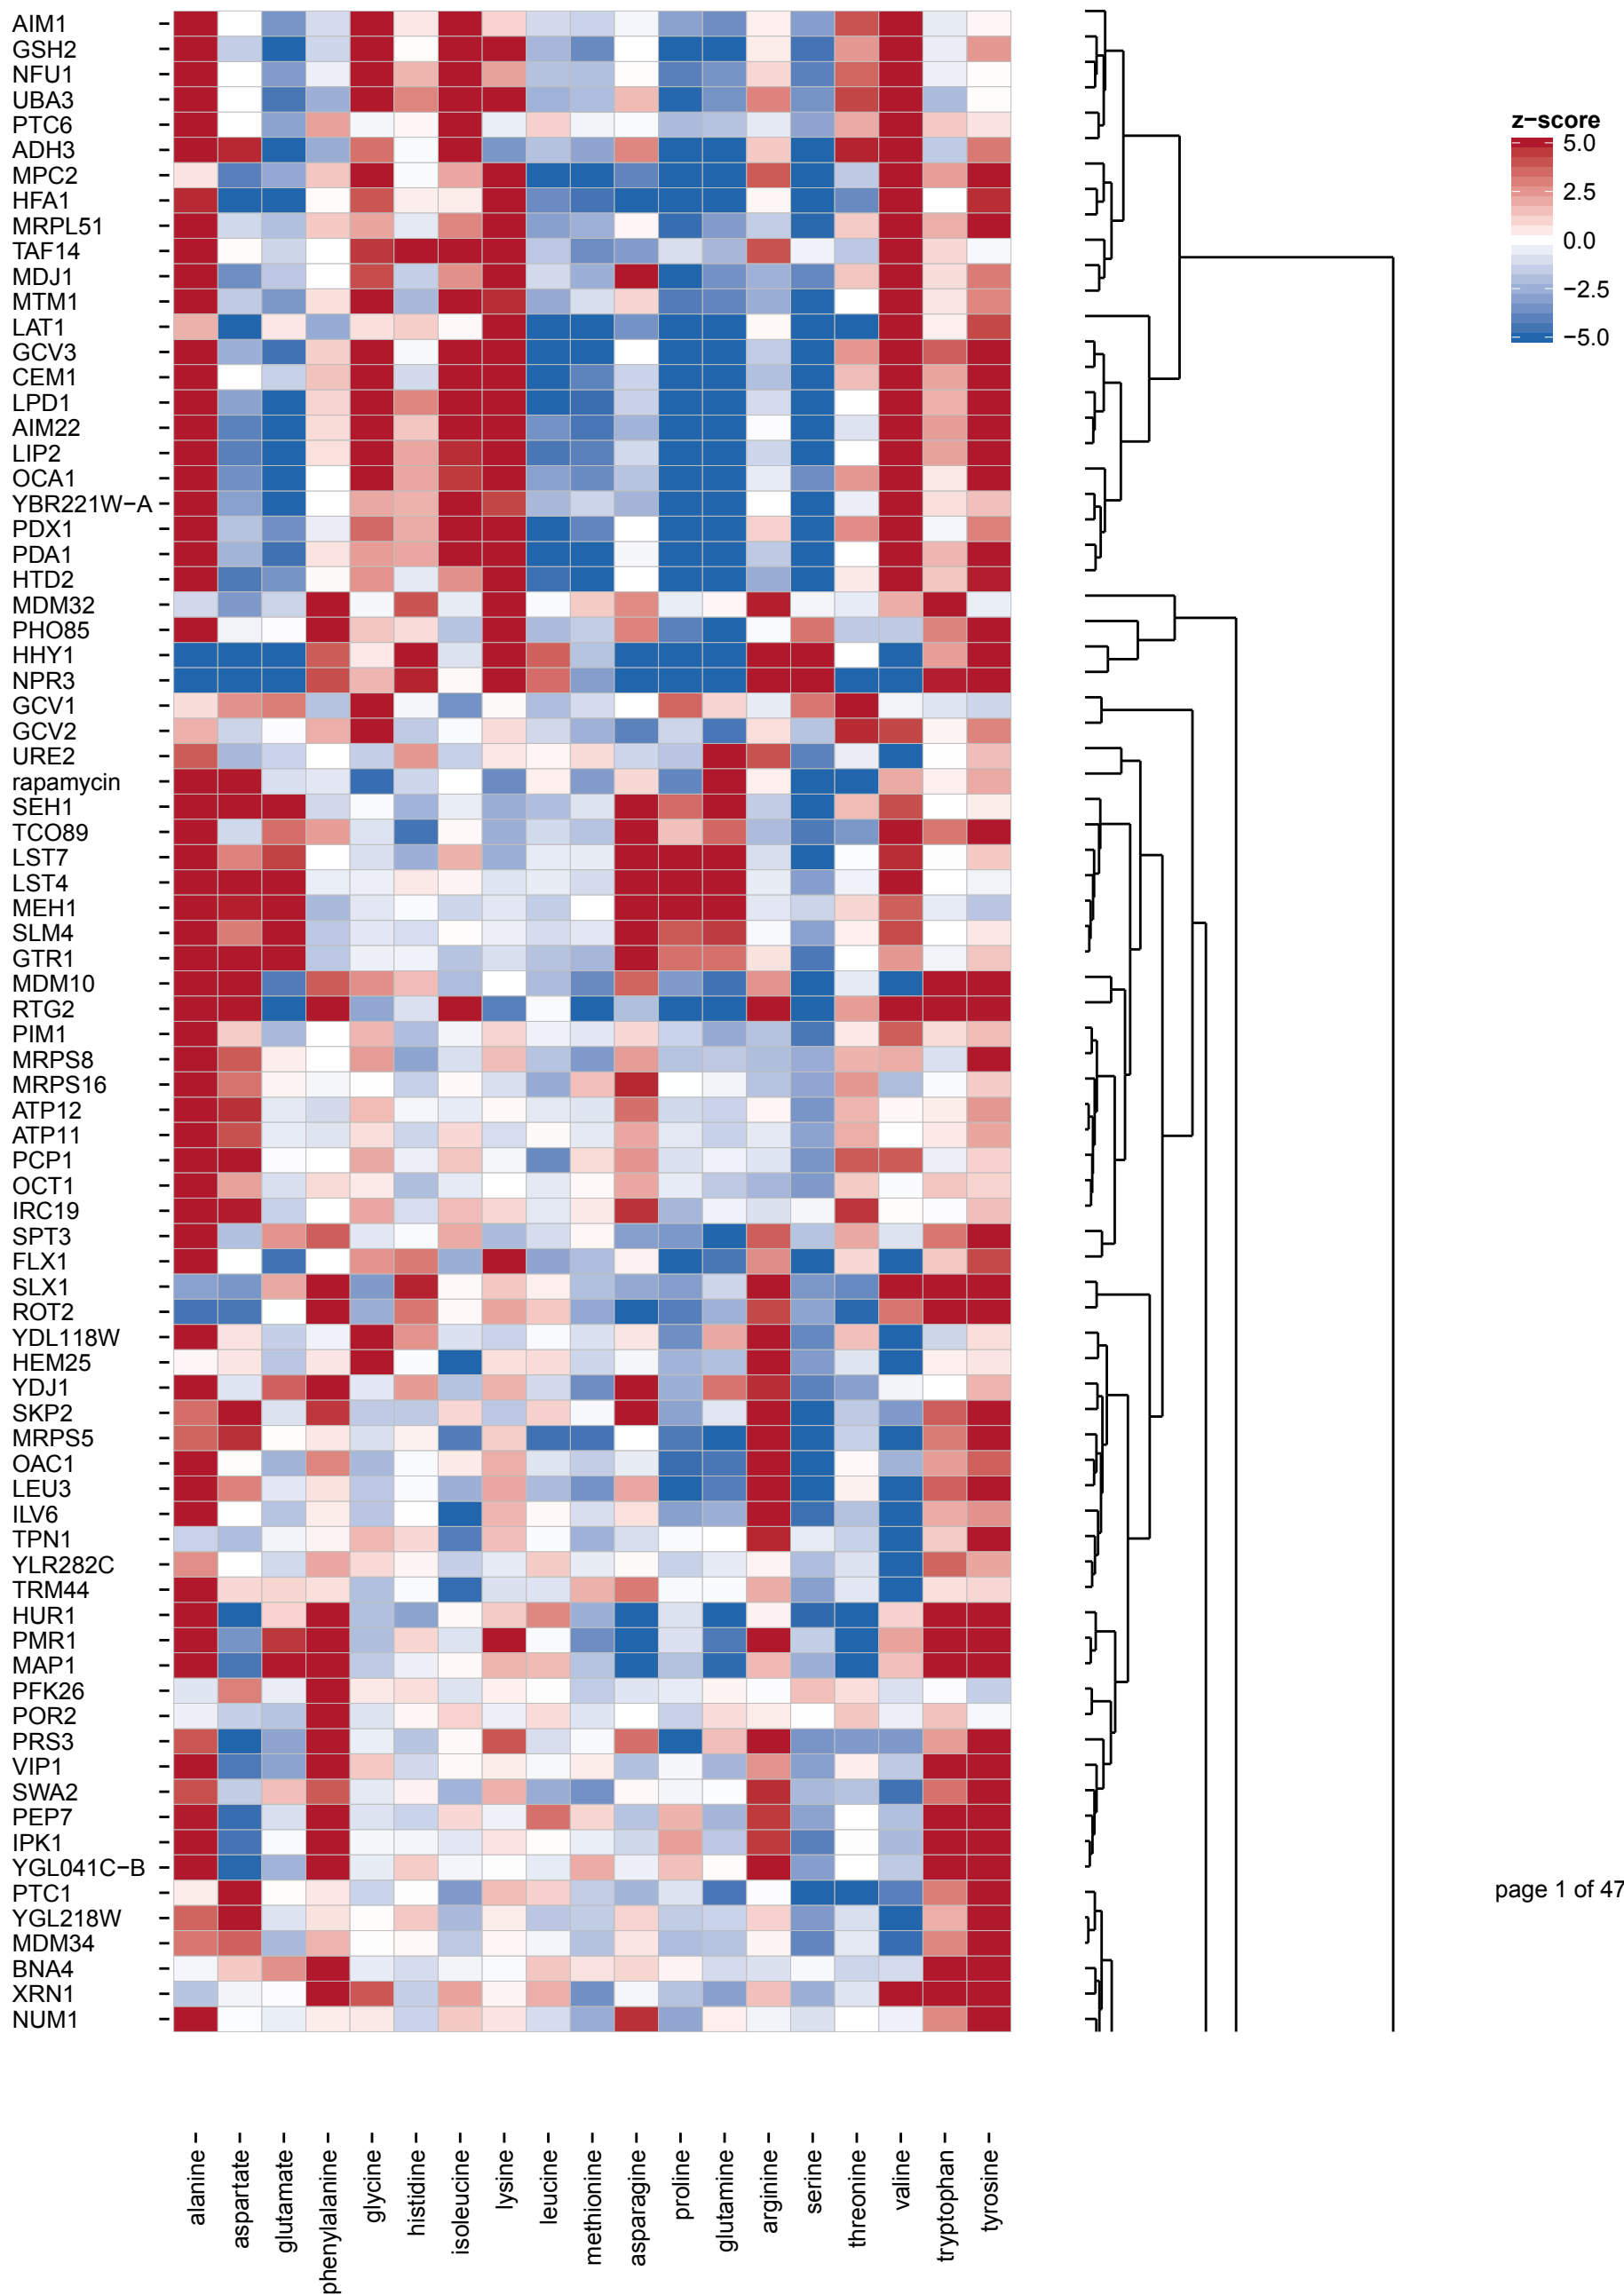

DHH1  
 UGO1  
 RNR4  
 YDR115W  
 RNR1  
 MRPL16  
 MRPL20  
 SUV3  
 KNH1  
 CCM1  
 SHU2  
 YGP1  
 MSF1  
 PPA2  
 MSM1  
 HER2  
 MTF1  
 SLT2  
 MRPL33  
 MRPL17  
 FZO1  
 UBC5  
 RSM22  
 MTG2  
 ROX3  
 GEP5  
 RSM26  
 RPH1  
 RRG9  
 VPS33  
 AEP1  
 EXO5  
 IMG2  
 MRP1  
 FRA2  
 YGR219W  
 PET123  
 POR1  
 MRPL11  
 RMD9  
 TIM11  
 LDB17  
 EUG1  
 ATP4  
 MRH4  
 RRG8  
 MRPL22  
 MRPL38  
 SPO23  
 RSM27  
 ATG20  
 YDR114C  
 GTF1  
 HTB2  
 AVL9  
 GEP3  
 PET112  
 MRPL40  
 SWD3  
 DCS1  
 PKH2  
 PRO1  
 YKL169C  
 QRI5  
 MEF2  
 ADD37  
 MSE1  
 ATP25  
 YJL027C  
 MRPL10  
 YJR114W  
 RRG7  
 MRPL36  
 MRPL7  
 MEC3  
 FYV6  
 MHR1  
 YOR199W  
 RML2  
 ATP5  
 TVP18  
 SLM5  
 RRG1  
 GLO3  
 HEM14  
 CBC2  
 AGP2  
 ISW1  
 ARP5  
 YHR175W-A  
 SLS1  
 RIM1  
 MGM101  
 RPL13B  
 DIA2  
 PAC10  
 GIM3  
 GEP4  
 RAI1  
 TIF4631

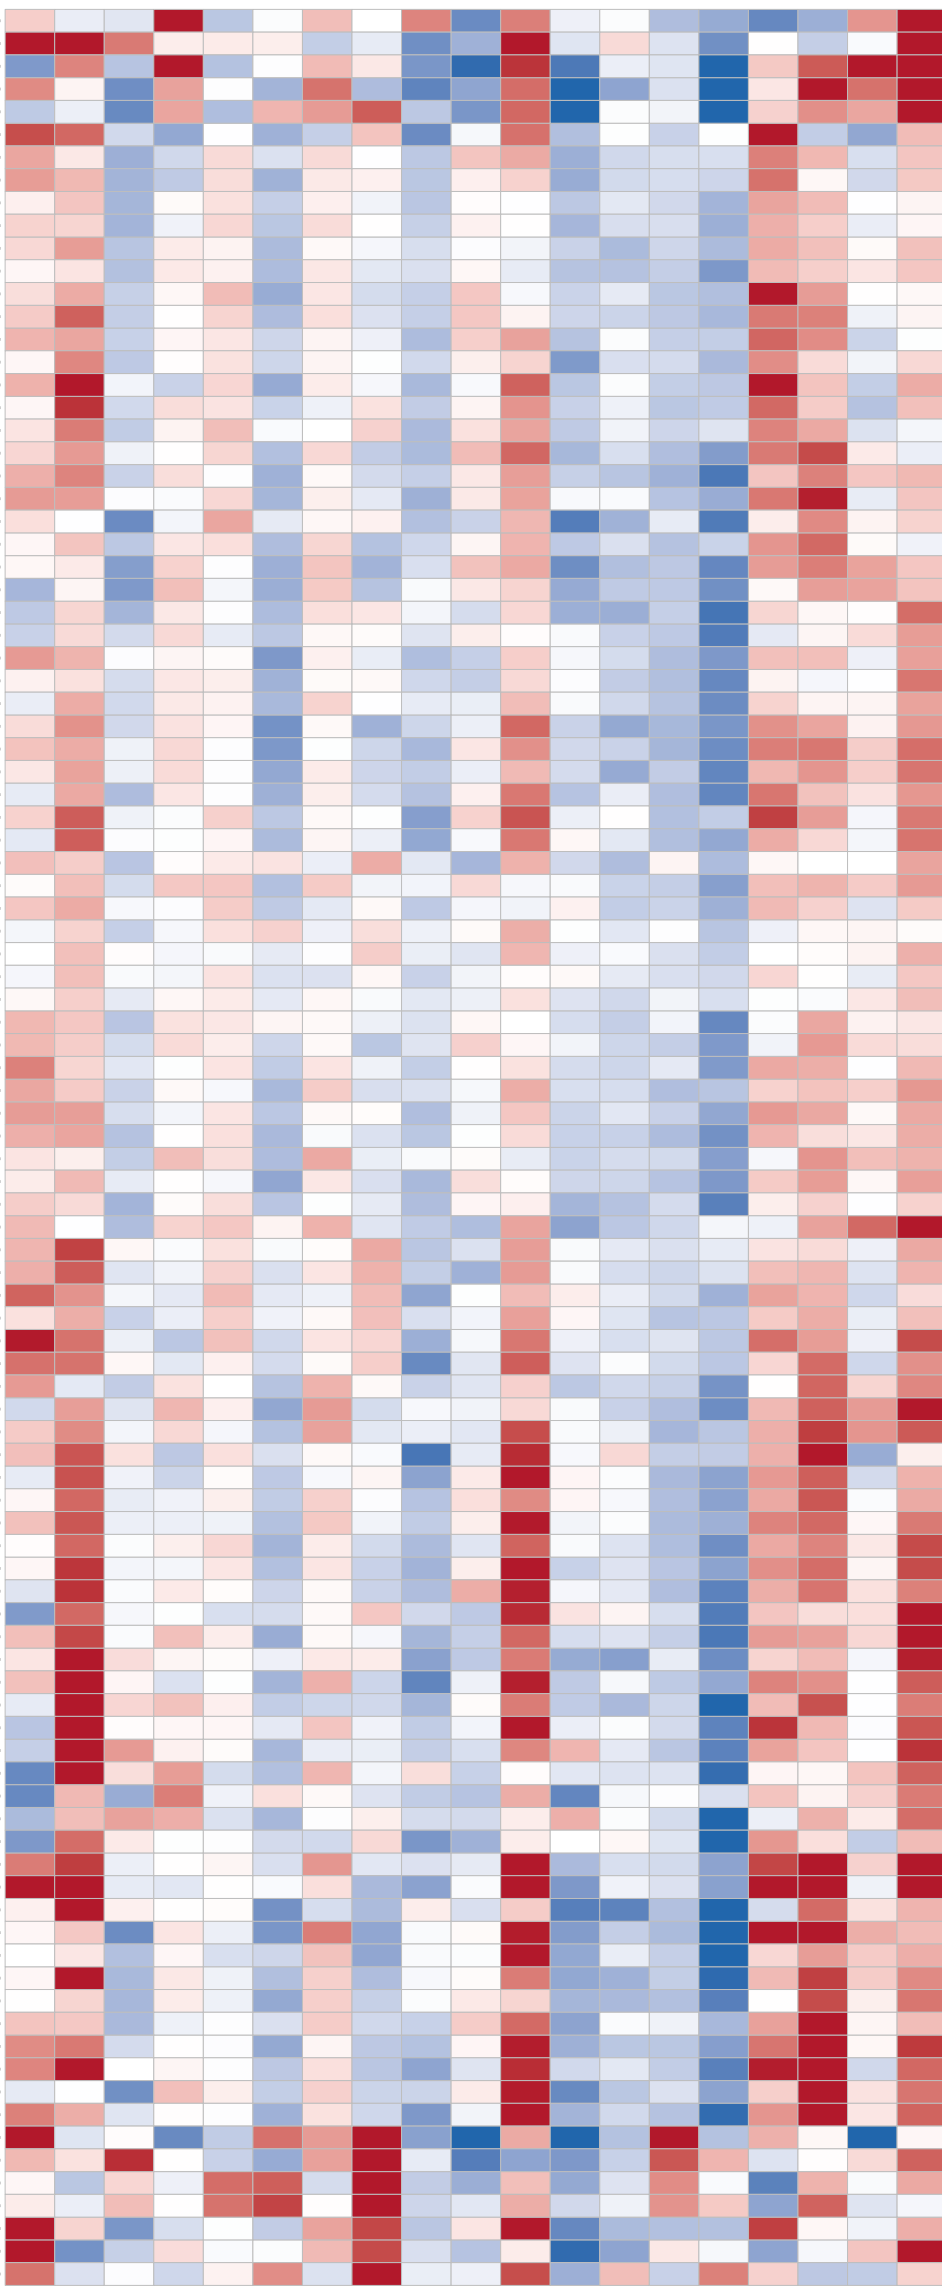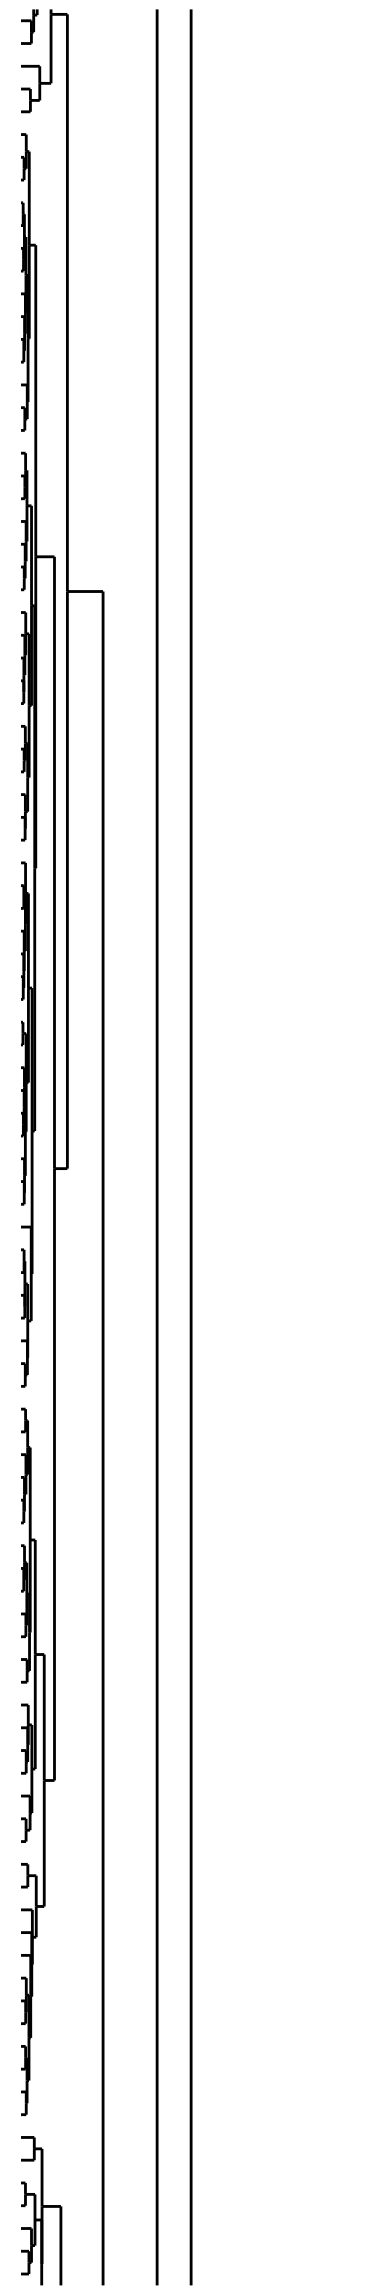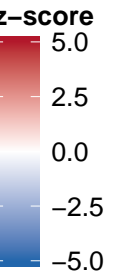

alanine -  
 aspartate -  
 glutamate -  
 phenylalanine -  
 glycine -  
 histidine -  
 isoleucine -  
 lysine -  
 leucine -  
 methionine -  
 asparagine -  
 proline -  
 glutamine -  
 arginine -  
 serine -  
 threonine -  
 valine -  
 tryptophan -  
 tyrosine -

RPP1A  
 YPQ1  
 CMR1  
 SFA1  
 ECM31  
 RPL21A  
 SHP1  
 HSL7  
 UMP1  
 PRE9  
 SPT10  
 LTV1  
 BUD23  
 EFG1  
 RPS16A  
 NAT3  
 ARG7  
 DEF1  
 SFP1  
 MOT2  
 cycloheximide  
 GON7  
 FU11  
 YBR197C  
 CTK3  
 YBR225W  
 LOC1  
 YPT10  
 HCR1  
 FIN1  
 LSM6  
 TSR2  
 ARP8  
 BFR1  
 UAF30  
 BUD19  
 RPP2B  
 RPL37B  
 RPL9B  
 DBP7  
 RPL31A  
 RPL36B  
 BCH2  
 DAL81  
 LRP1  
 DBP3  
 BUD28  
 YNL226W  
 REX2  
 NCL1  
 RPL11B  
 HMO1  
 RPL14A  
 HIT1  
 RSA1  
 DOM34  
 RPS29B  
 BUD26  
 RPS16B  
 FYV7  
 RPS11B  
 RPS9B  
 YER156C  
 RPS22B  
 RPS28A  
 RPS7B  
 ULS1  
 SEM1  
 RPS19B  
 IRC13  
 PHO5  
 RPA14  
 RPS1A  
 RPS19A  
 MUP1  
 RPS18B  
 RPS21A  
 RPS10B  
 RPS14A  
 TGS1  
 YGR054W  
 RPS28B  
 MUD2  
 YOR309C  
 UBR2  
 PIH1  
 MUB1  
 APQ12  
 CPR7  
 RPS7A  
 RPS0A  
 RPS29A  
 RRP8  
 YGL088W  
 RPL20A  
 RPS4B  
 RPS17A  
 YGR160W  
 RPS0B  
 RPS18A

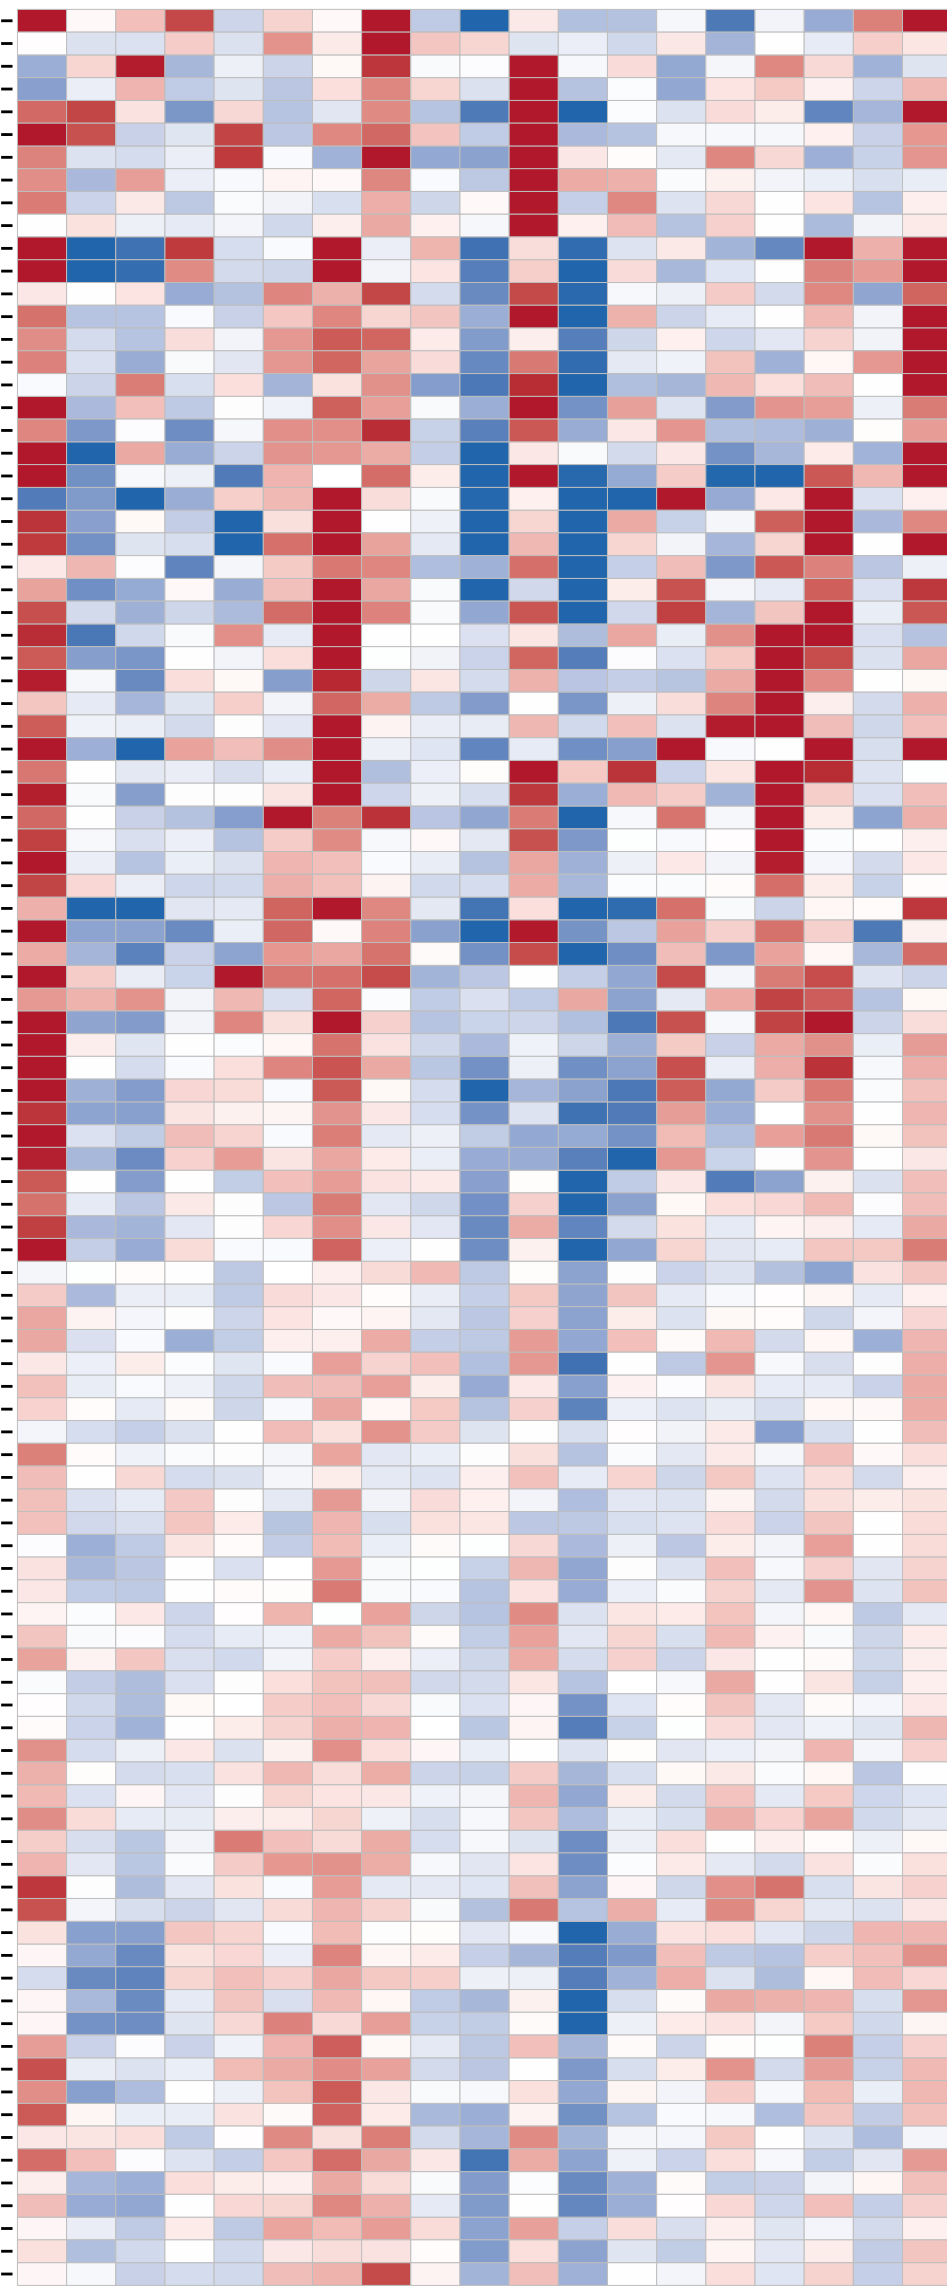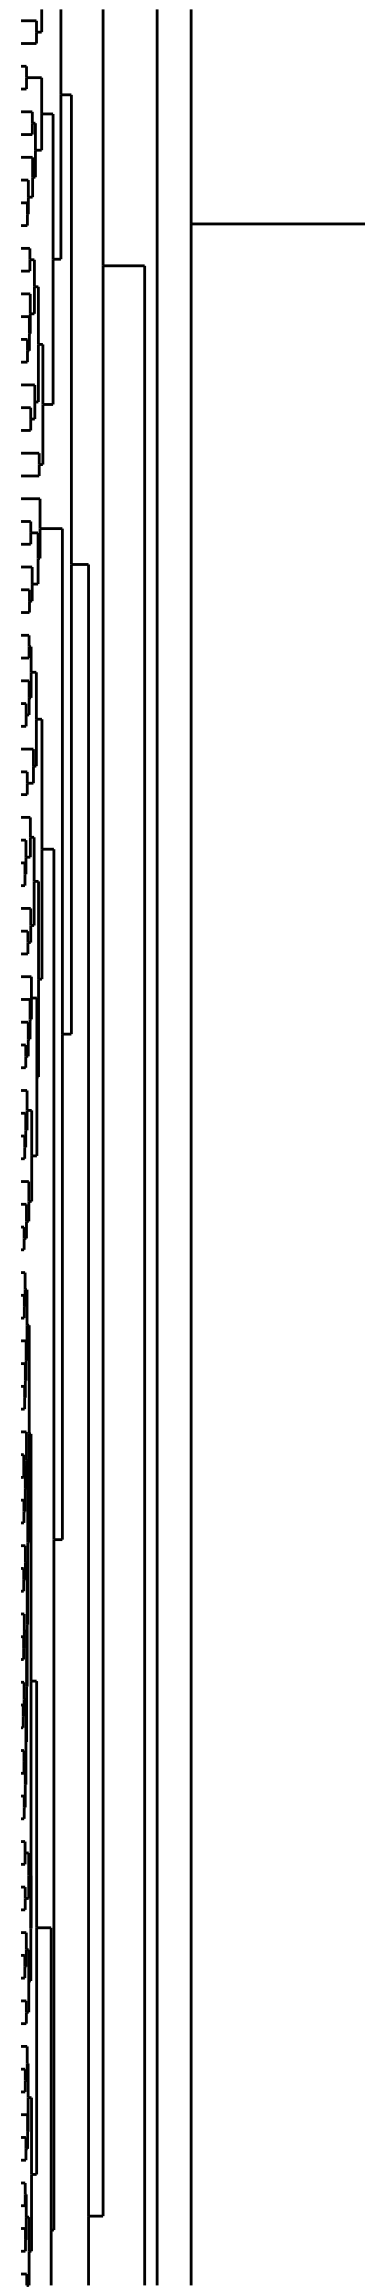

alanine -  
 aspartate -  
 glutamate -  
 phenylalanine -  
 glycine -  
 histidine -  
 isoleucine -  
 lysine -  
 leucine -  
 methionine -  
 asparagine -  
 proline -  
 glutamine -  
 arginine -  
 serine -  
 threonine -  
 valine -  
 tryptophan -  
 tyrosine -

FMP25  
RPL20B  
RPL1B  
VPS1  
SRV2  
YLL044W  
YPR071W  
BUD31  
IRC25  
RPS10A  
AVT7  
SNT1  
YJL119C  
SET2  
YJL169W  
SIF2  
HOS2  
SET3  
CDC73  
SIN3  
NUP84  
GCN1  
NUP120  
LOA1  
YBR085C-A  
YDR524C-B  
TSR3  
HSP12  
TMA23  
YME1  
MSS116  
RAD23  
COQ6  
UBP13  
ISU1  
KAP120  
YPL114W  
SPO19  
BUD14  
YPL162C  
PRM10  
ALB1  
YMR196W  
KES1  
RPL1A  
MSH5  
DMC1  
YER181C  
CAR1  
YMR141C  
SVS1  
YIG1  
COQ4  
CPD1  
YIA6  
MMT1  
YDC1  
ITC1  
INA17  
MSH1  
SOL3  
YMR144W  
YOR343C  
RHO4  
TYE7  
RVS161  
DNL4  
DBP1  
ATG5  
RRD2  
RAD9  
YLR171W  
YLL020C  
TMA17  
SLI1  
SHU1  
YJR030C  
GEA1  
THI6  
YPL216W  
CNB1  
YGL108C  
HTA2  
HRT3  
RTS1  
GIM4  
MAD3  
SOK2  
GLT1  
AMF1  
SNT309  
YMR158C-A  
SYS1  
TOM6  
FSH1  
SRS2  
MSC7  
AIM34  
WHI5  
YMR252C

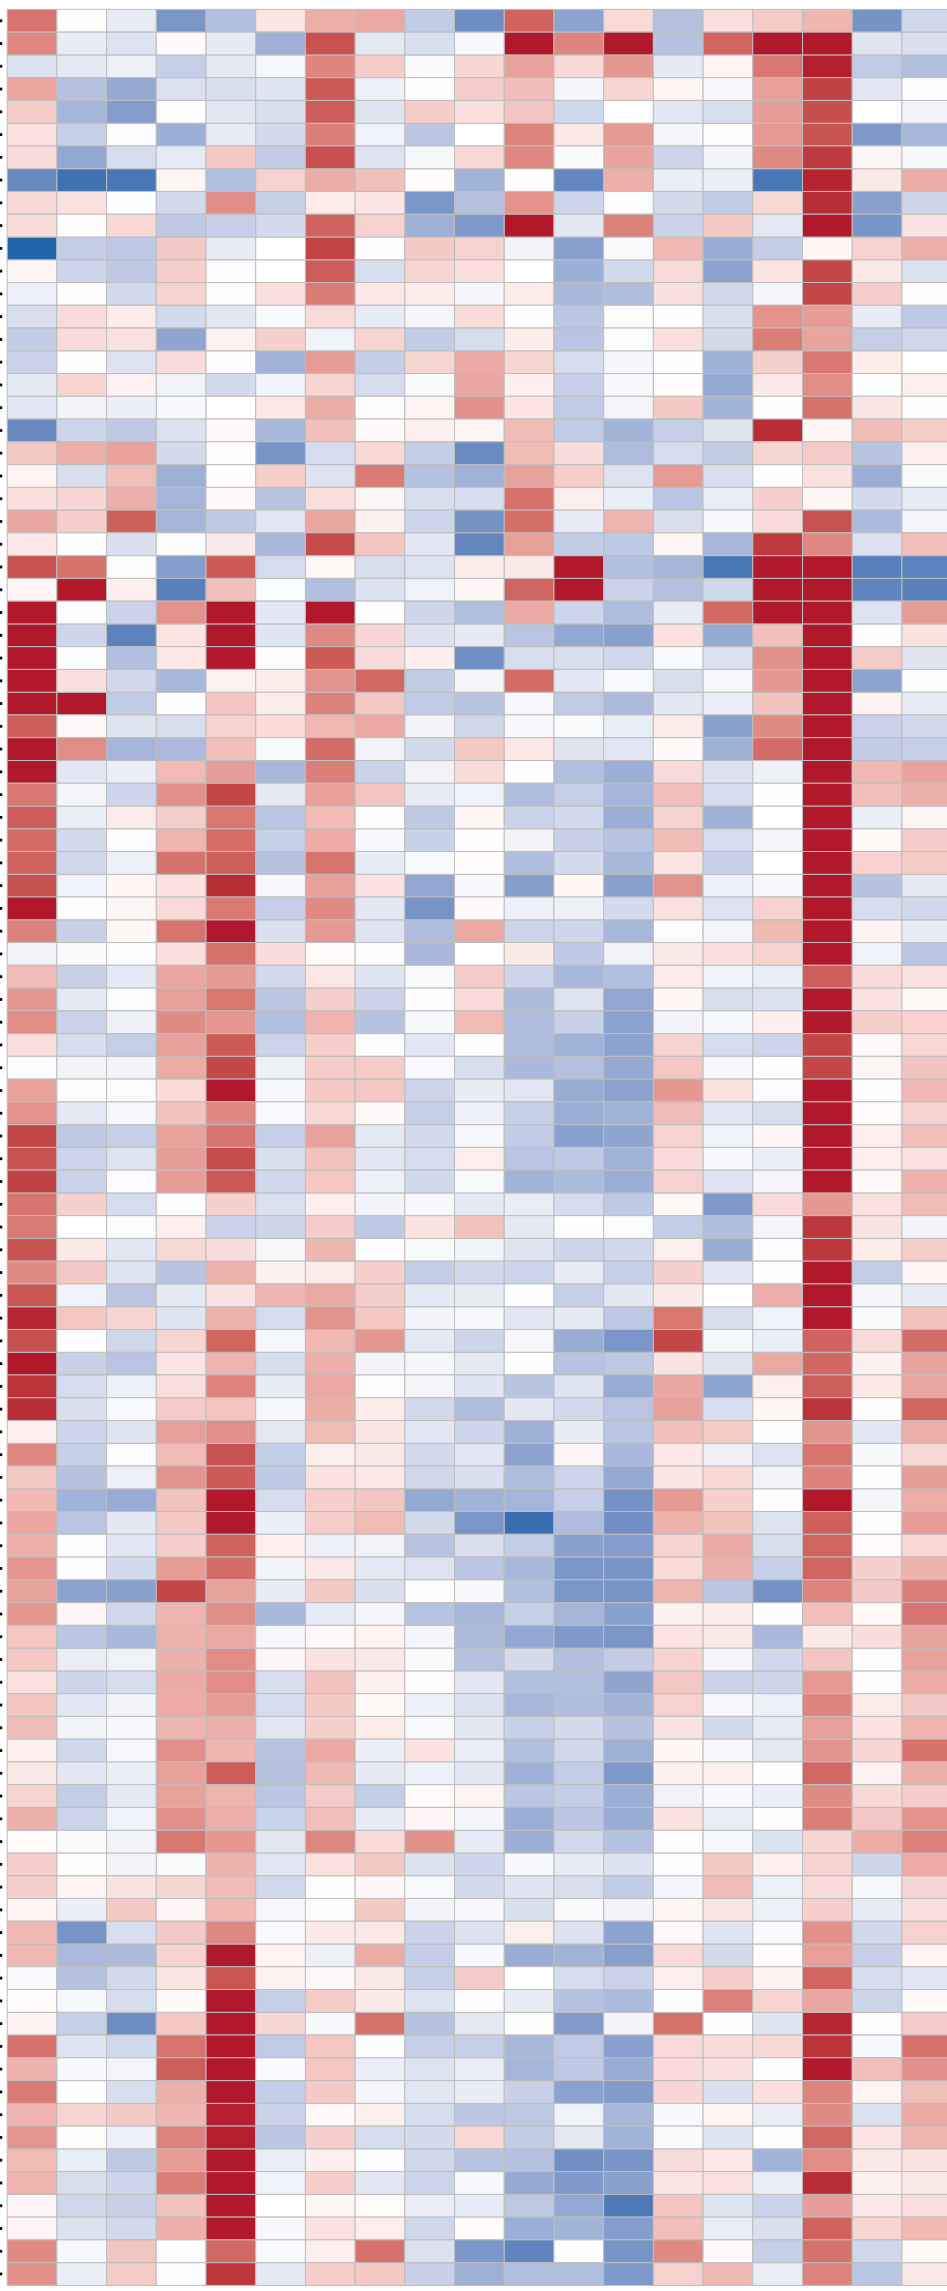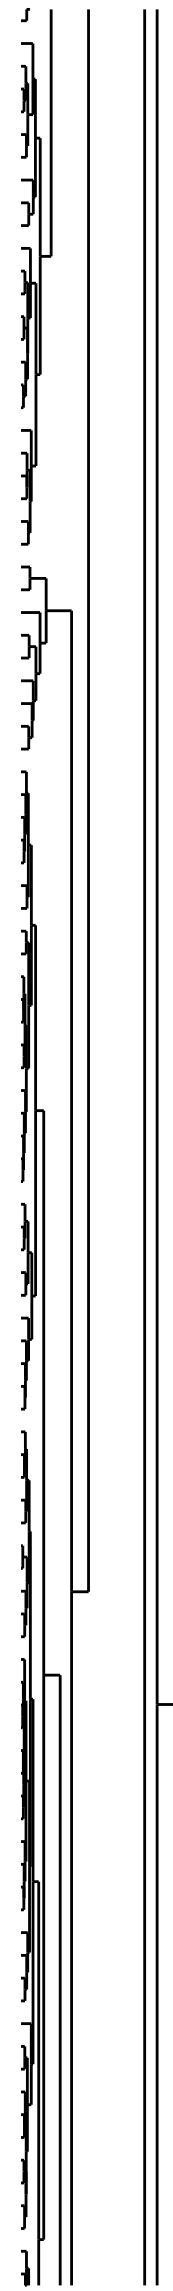

alanine -  
aspartate -  
glutamate -  
phenylalanine -  
glycine -  
histidine -  
isoleucine -  
lysine -  
leucine -  
methionine -  
asparagine -  
proline -  
glutamine -  
arginine -  
serine -  
threonine -  
valine -  
tryptophan -  
tyrosine -

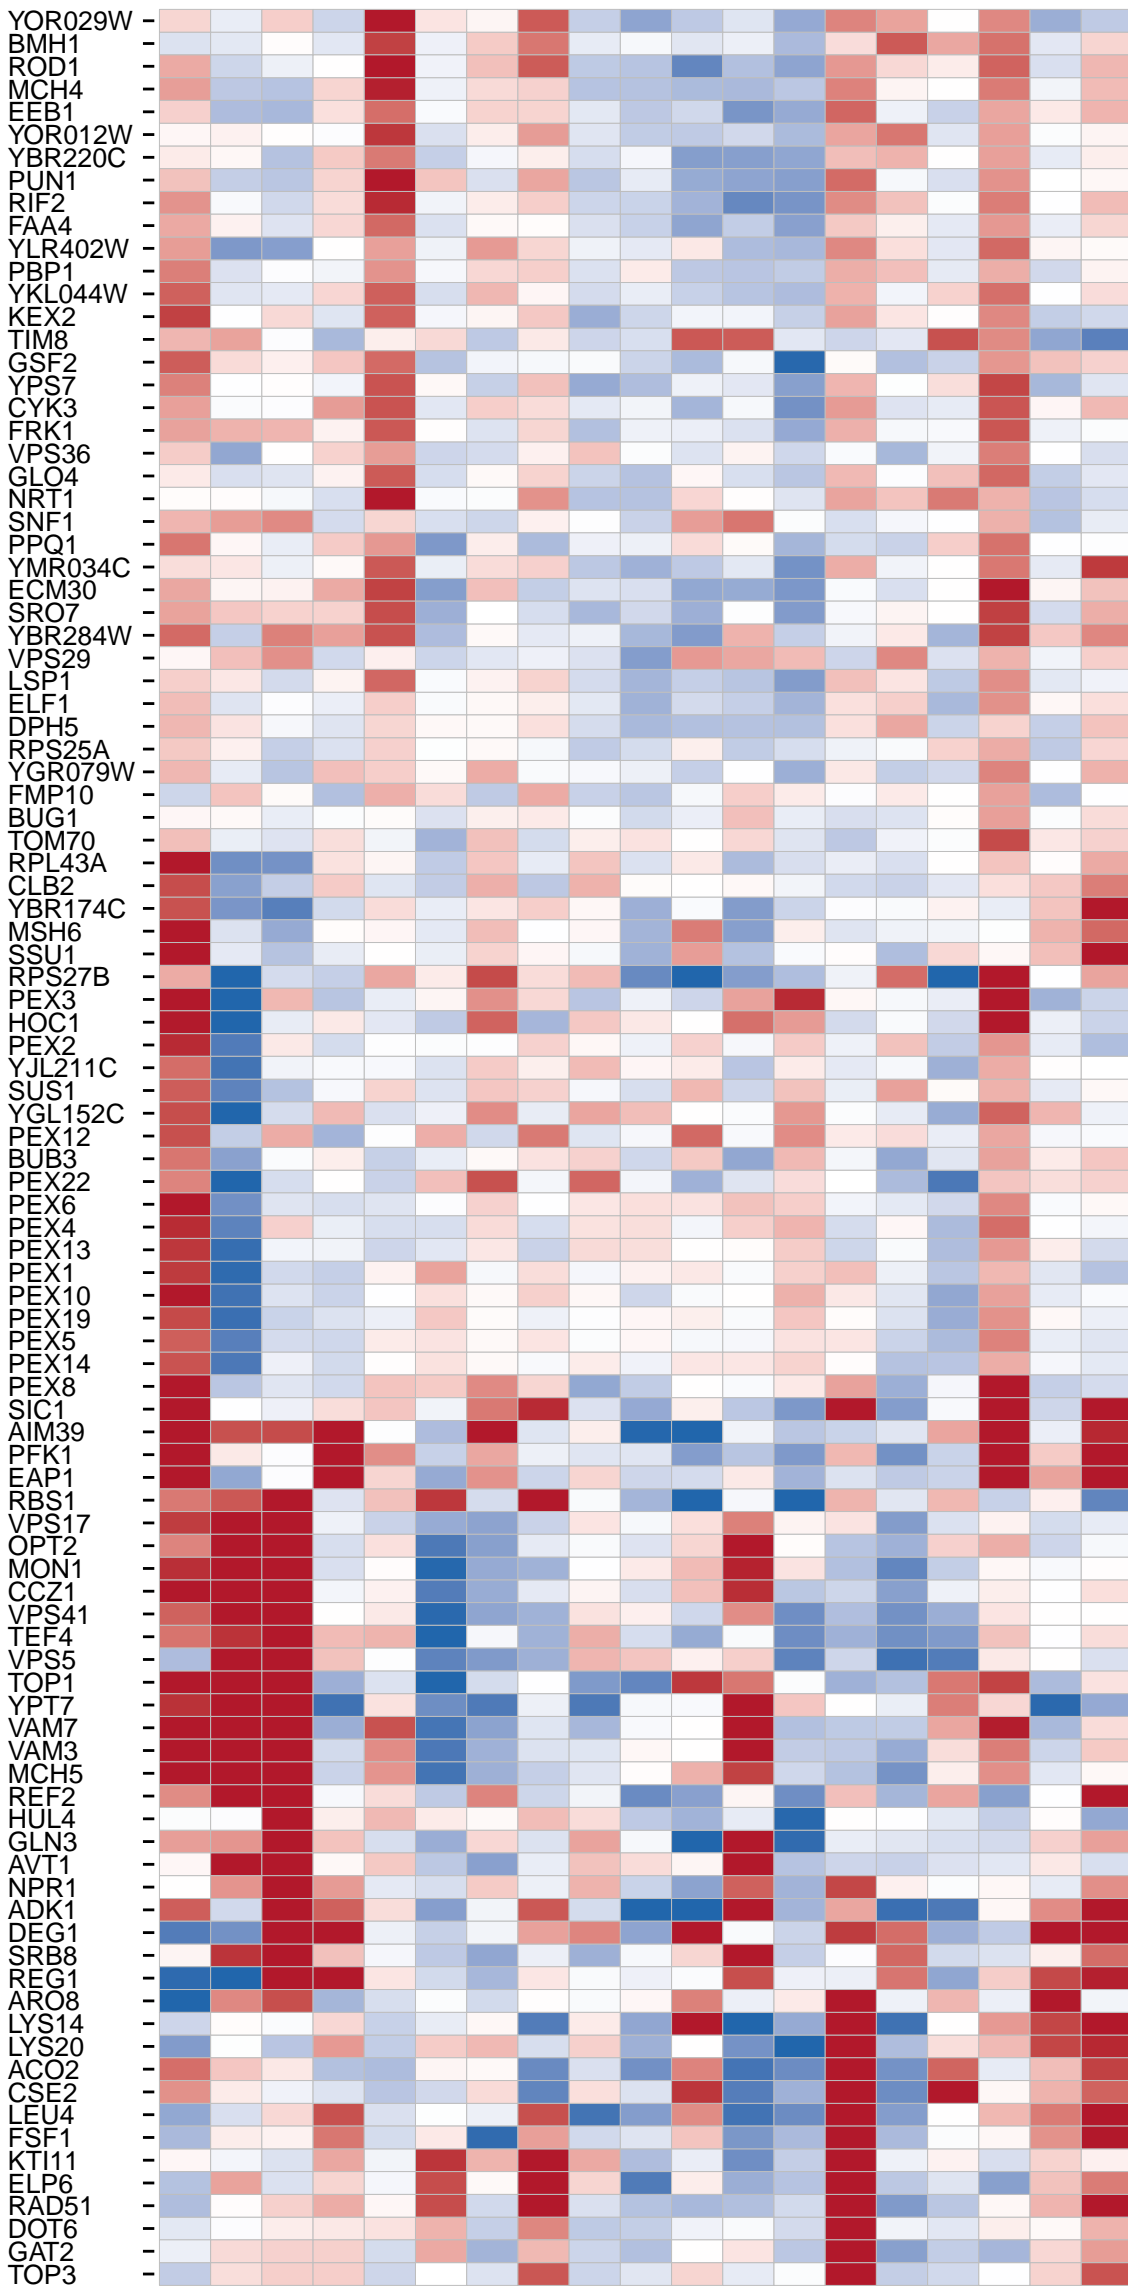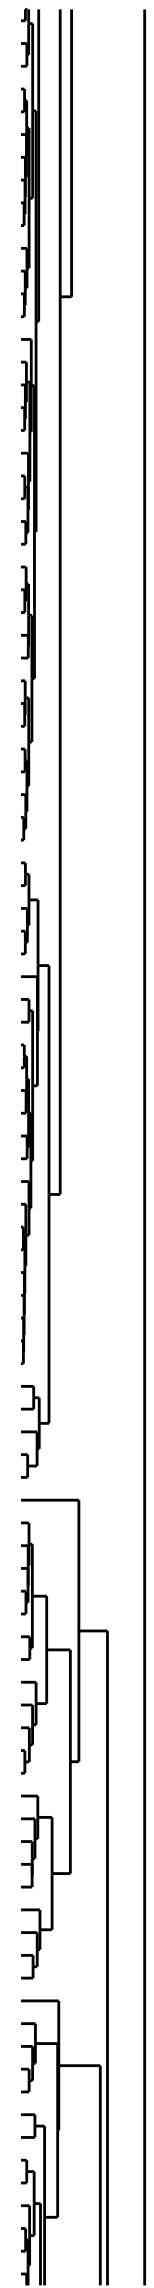

alanine -  
aspartate -  
glutamate -  
phenylalanine -  
glycine -  
histidine -  
isoleucine -  
lysine -  
leucine -  
methionine -  
asparagine -  
proline -  
glutamine -  
arginine -  
serine -  
threonine -  
valine -  
tryptophan -  
tyrosine -

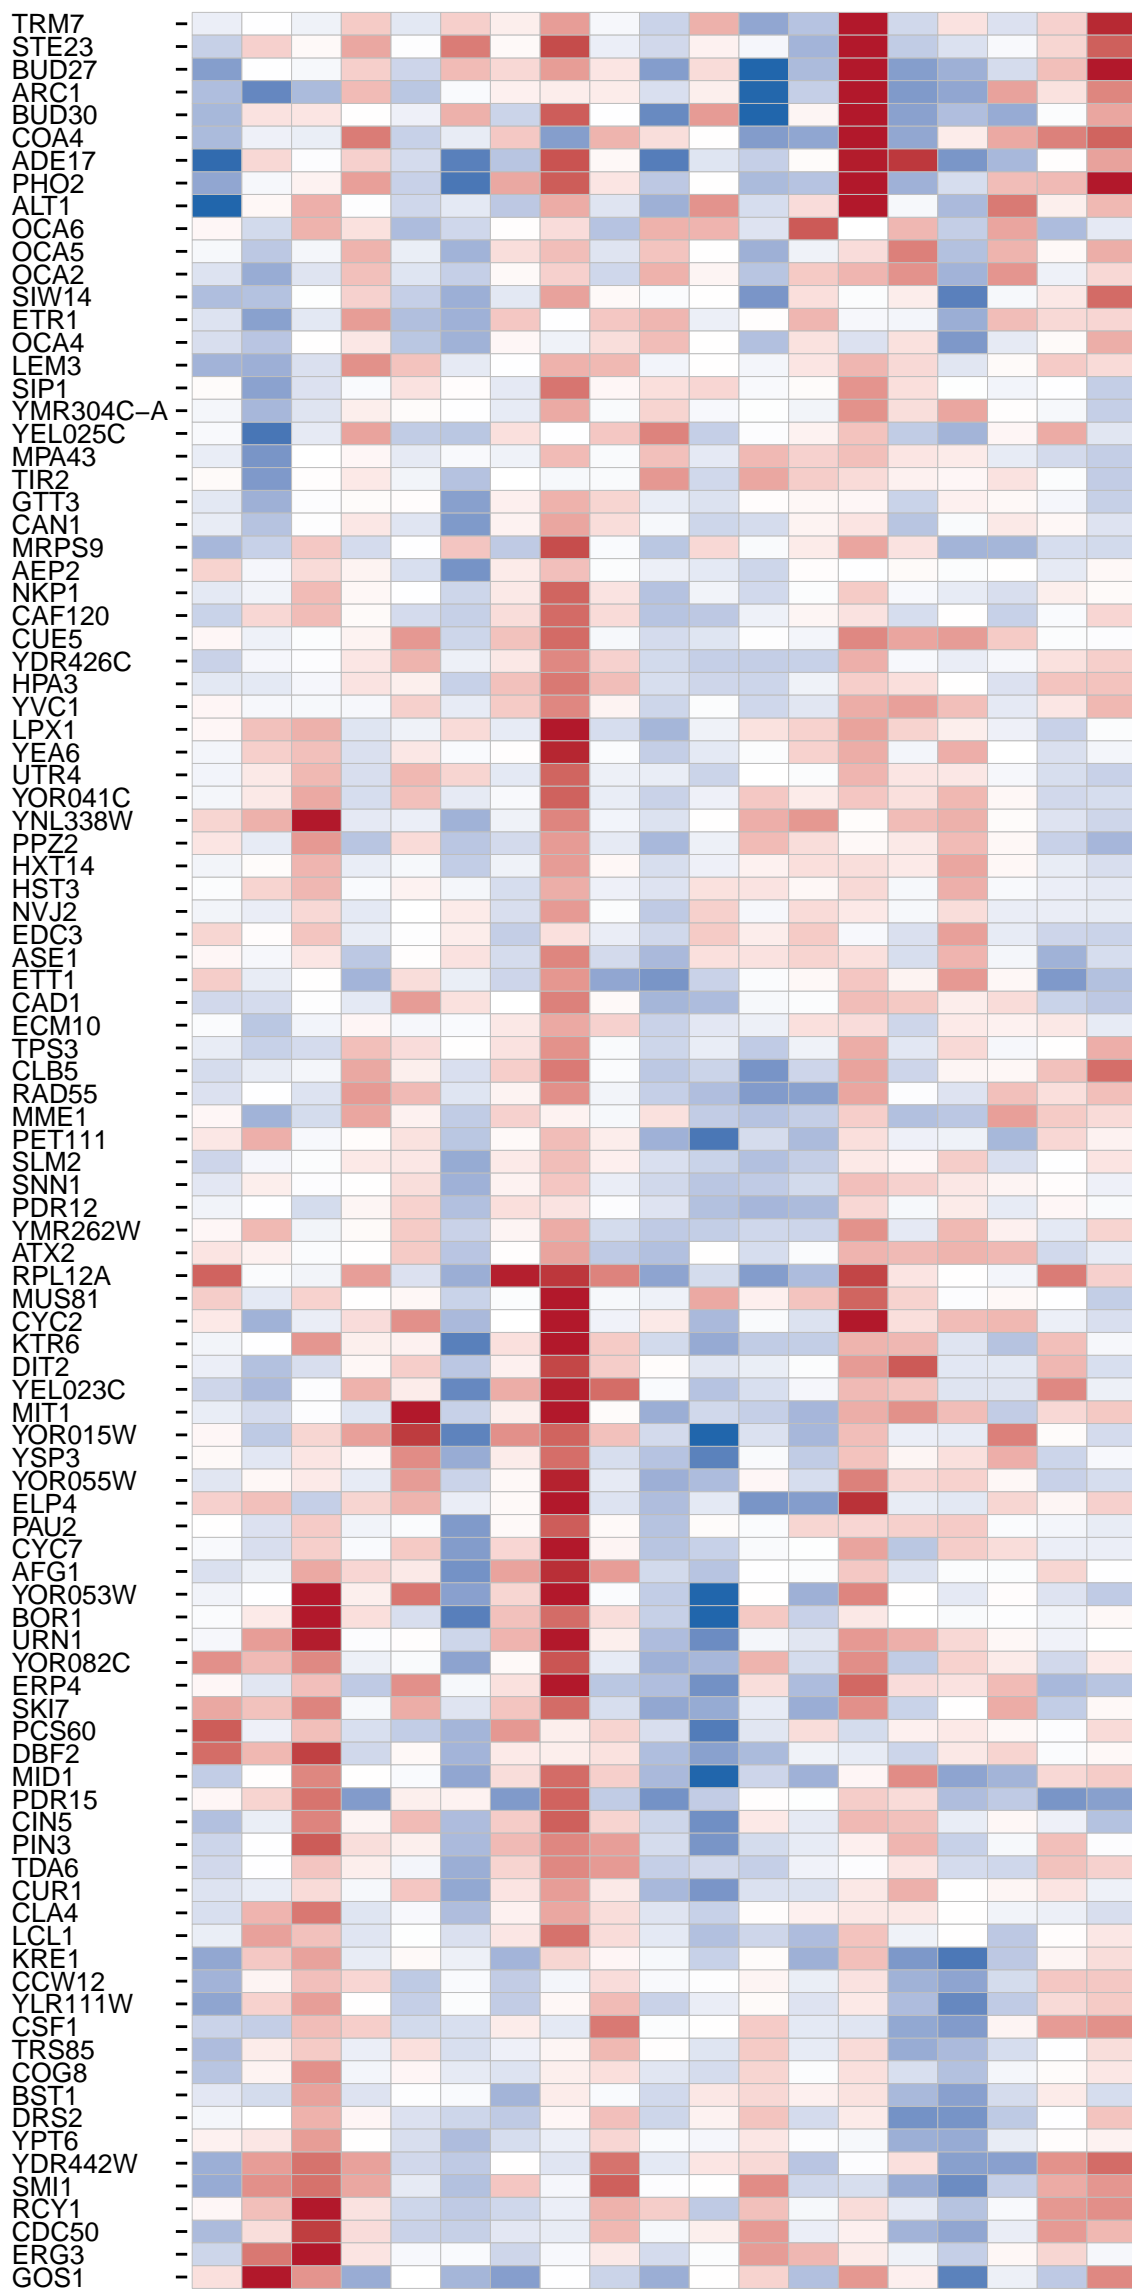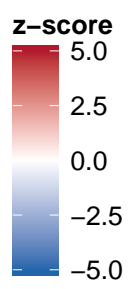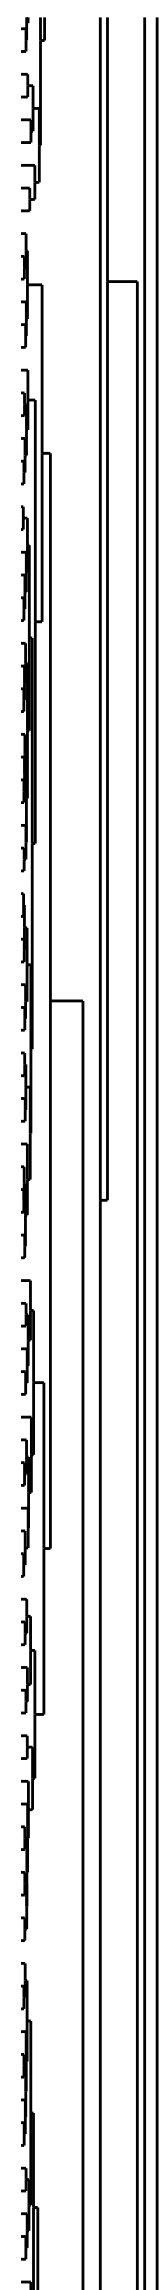

alanine -  
aspartate -  
glutamate -  
phenylalanine -  
glycine -  
histidine -  
isoleucine -  
lysine -  
leucine -  
methionine -  
asparagine -  
proline -  
glutamine -  
arginine -  
serine -  
threonine -  
valine -  
tryptophan -  
tyrosine -

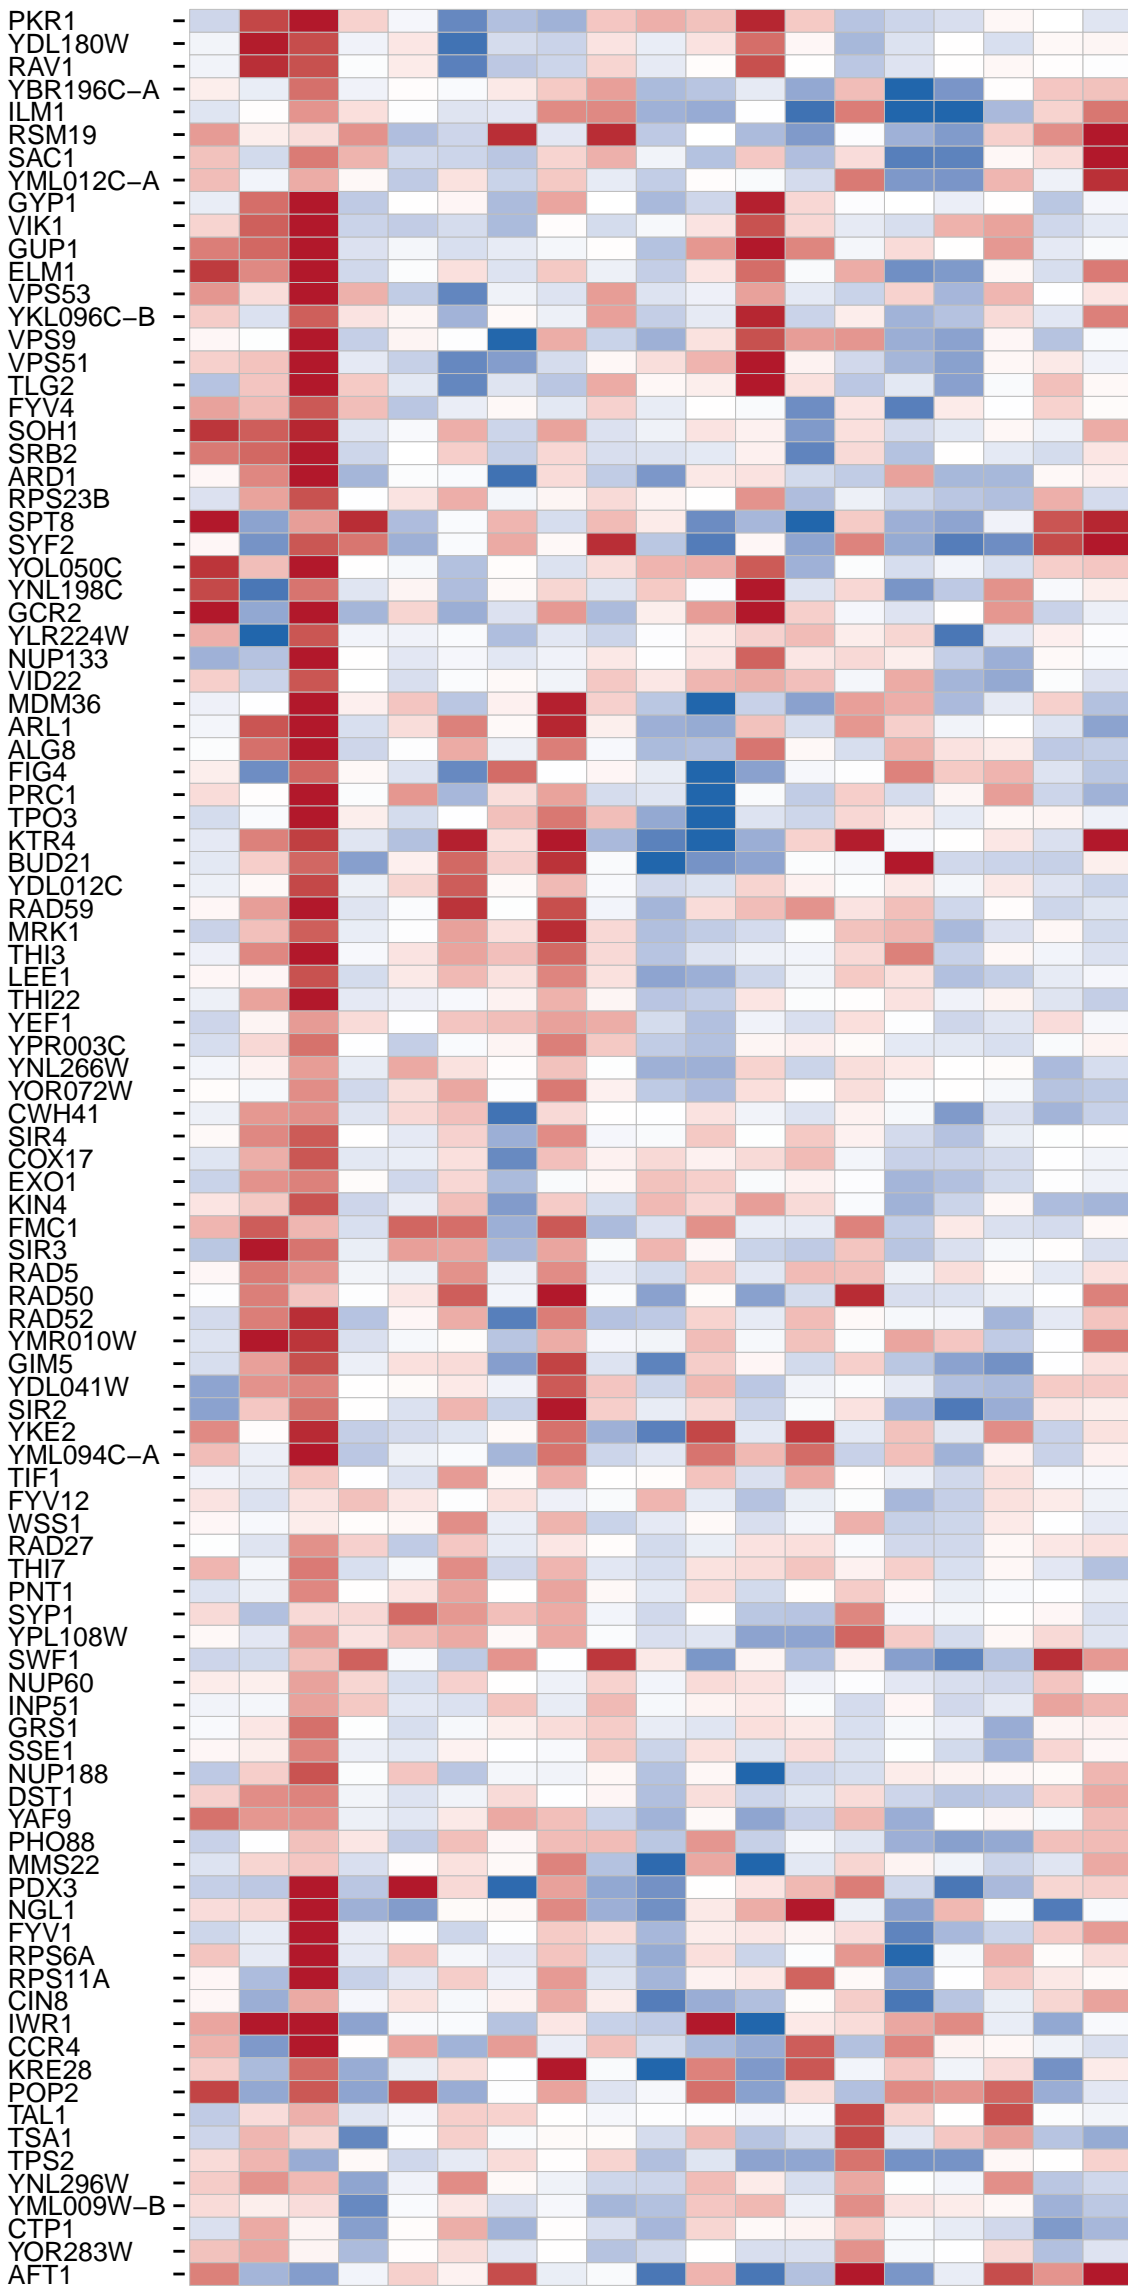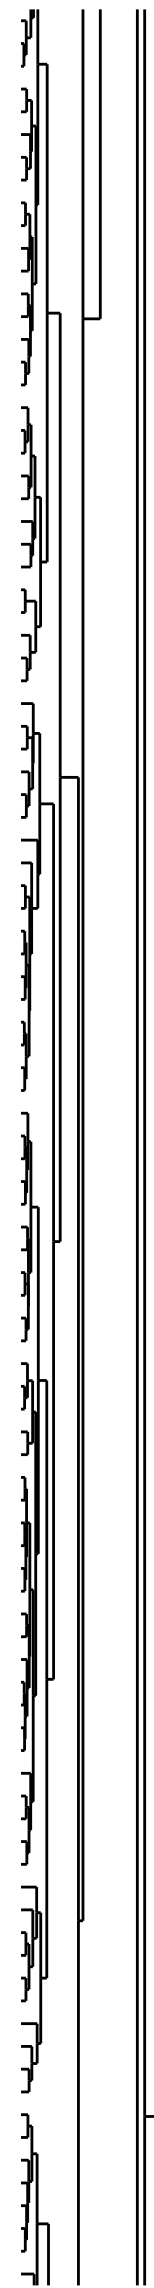

alanine -  
aspartate -  
glutamate -  
phenylalanine -  
glycine -  
histidine -  
isoleucine -  
lysine -  
leucine -  
methionine -  
asparagine -  
proline -  
glutamine -  
arginine -  
serine -  
threonine -  
valine -  
tryptophan -  
tyrosine -



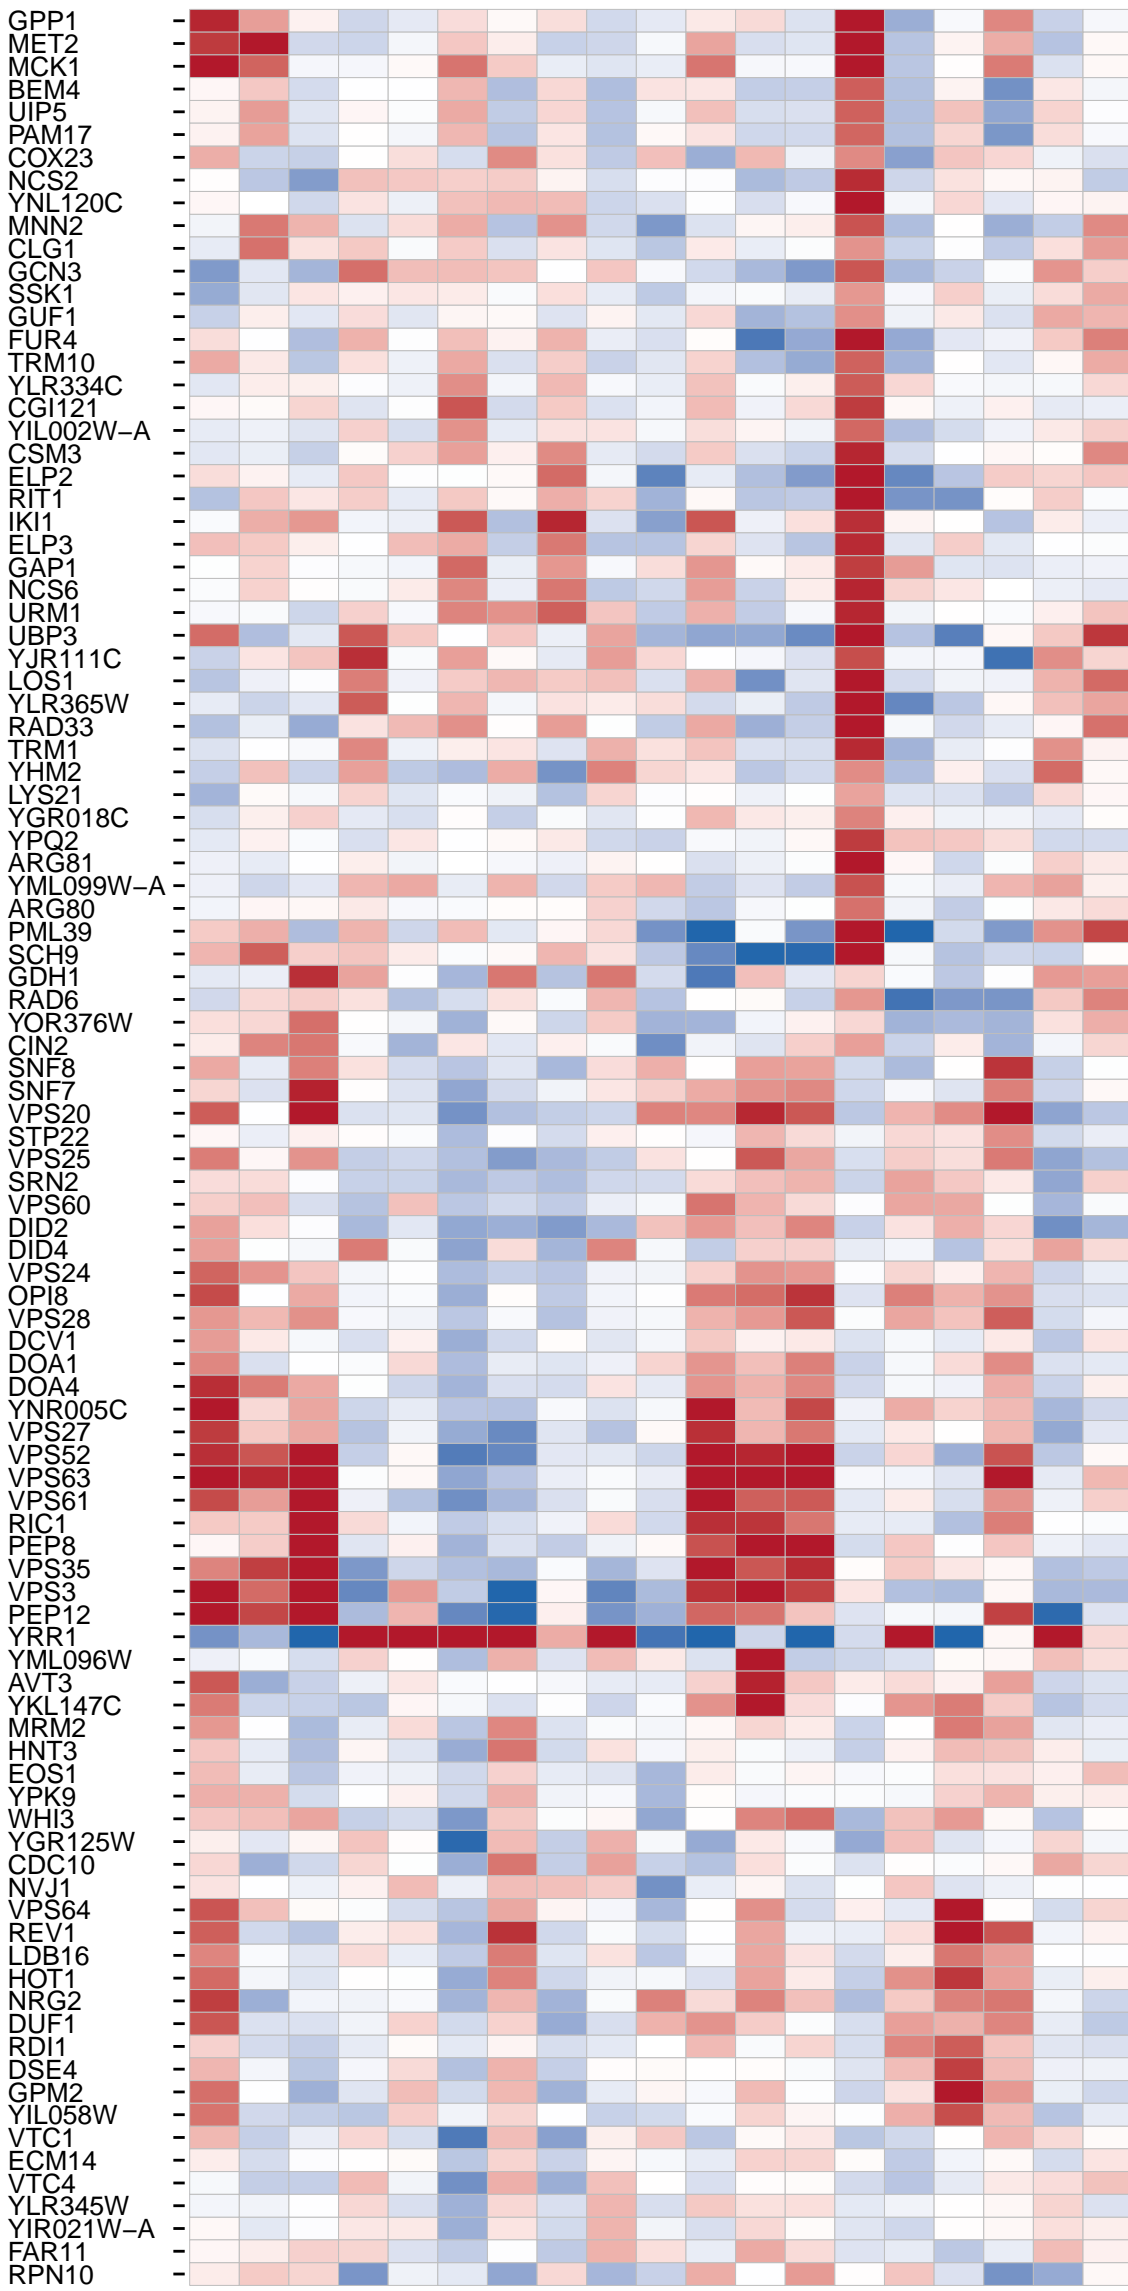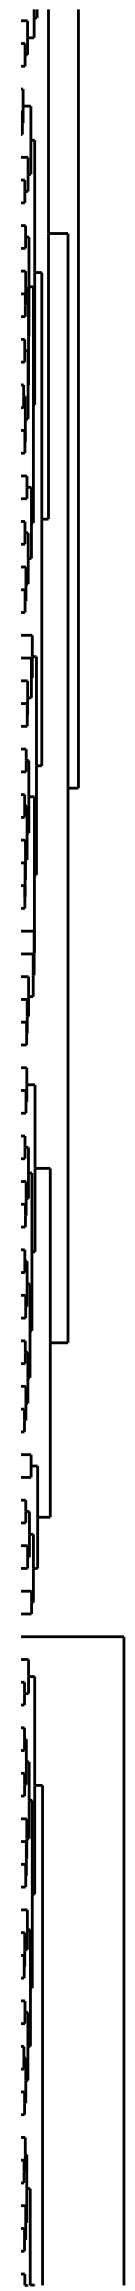

alanine -  
aspartate -  
glutamate -  
phenylalanine -  
glycine -  
histidine -  
isoleucine -  
lysine -  
leucine -  
methionine -  
asparagine -  
proline -  
glutamine -  
arginine -  
serine -  
threonine -  
valine -  
tryptophan -  
tyrosine -

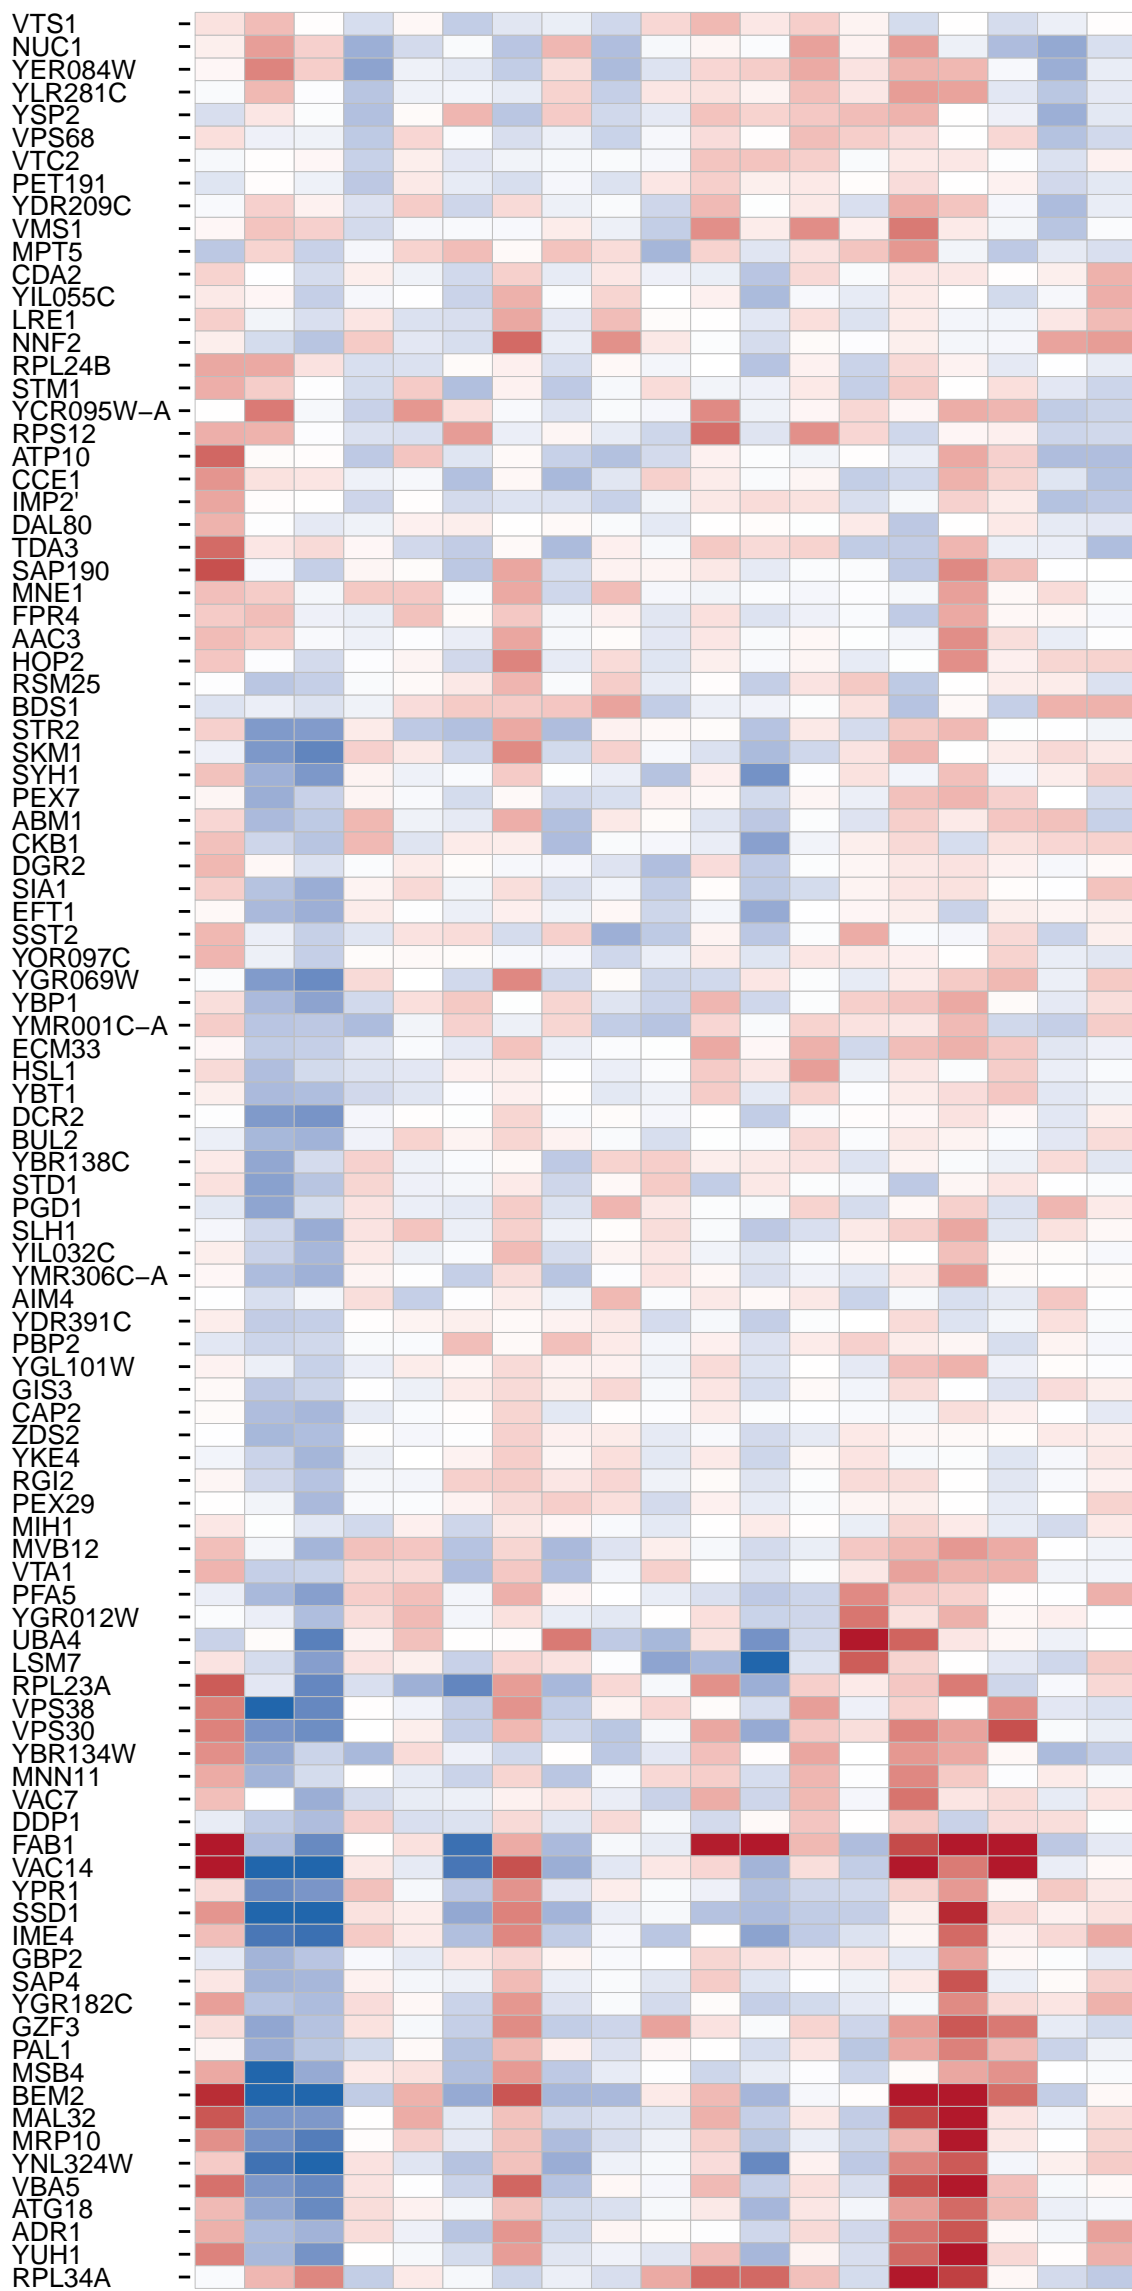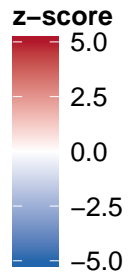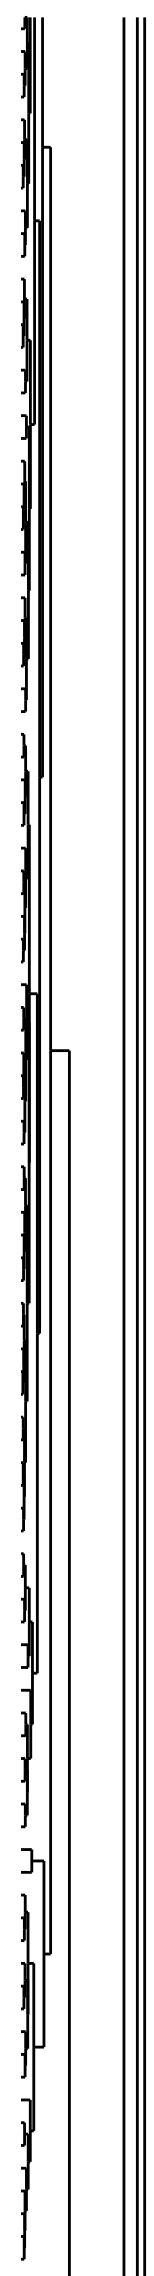

alanine -  
aspartate -  
glutamate -  
phenylalanine -  
glycine -  
histidine -  
isoleucine -  
lysine -  
leucine -  
methionine -  
asparagine -  
proline -  
glutamine -  
arginine -  
serine -  
threonine -  
valine -  
tryptophan -  
tyrosine -

SPT2  
 CHA4  
 HCH1  
 OST3  
 IML3  
 YHR022C  
 YHI9  
 RPS24A  
 RTT109  
 RPS26B  
 YKL063C  
 YLR169W  
 APS1  
 RAD7  
 RAD26  
 CBF1  
 RTK1  
 YDL009C  
 GRX6  
 RNH203  
 MNR2  
 SHH4  
 ADK2  
 RAD24  
 YER121W  
 YGL165C  
 CUP2  
 DCK1  
 TRF5  
 PPS1  
 UPS2  
 YLR149C  
 YLR173W  
 KDX1  
 YLL054C  
 NYV1  
 LCL2  
 YNL165W  
 BNI5  
 MUD1  
 SRL3  
 YJR107W  
 YLR152C  
 YNL040W  
 HEK2  
 PTC3  
 MRS4  
 TEL1  
 PSY1  
 RMD8  
 YPR064W  
 TDA5  
 YDL011C  
 YEL020C  
 YCK3  
 DFG16  
 PDR17  
 IST1  
 FUN14  
 GLG2  
 SPO7  
 EFT2  
 HKR1  
 SIZ1  
 ROY1  
 SCS7  
 IBD2  
 UTR1  
 OSM1  
 ISY1  
 RPA12  
 YBR182C-A  
 OPI9  
 RAD54  
 PCL1  
 SNF11  
 COQ1  
 YDR514C  
 SNF6  
 SNF5  
 SNF2  
 GAL11  
 CUE3  
 PEX25  
 FLC1  
 ECL1  
 NSG2  
 YBR116C  
 SKO1  
 SSB2  
 SML1  
 YML037C  
 SPA2  
 YML084W  
 MSS1  
 GIS4  
 OST6  
 SHE4  
 ZAP1  
 NDE1

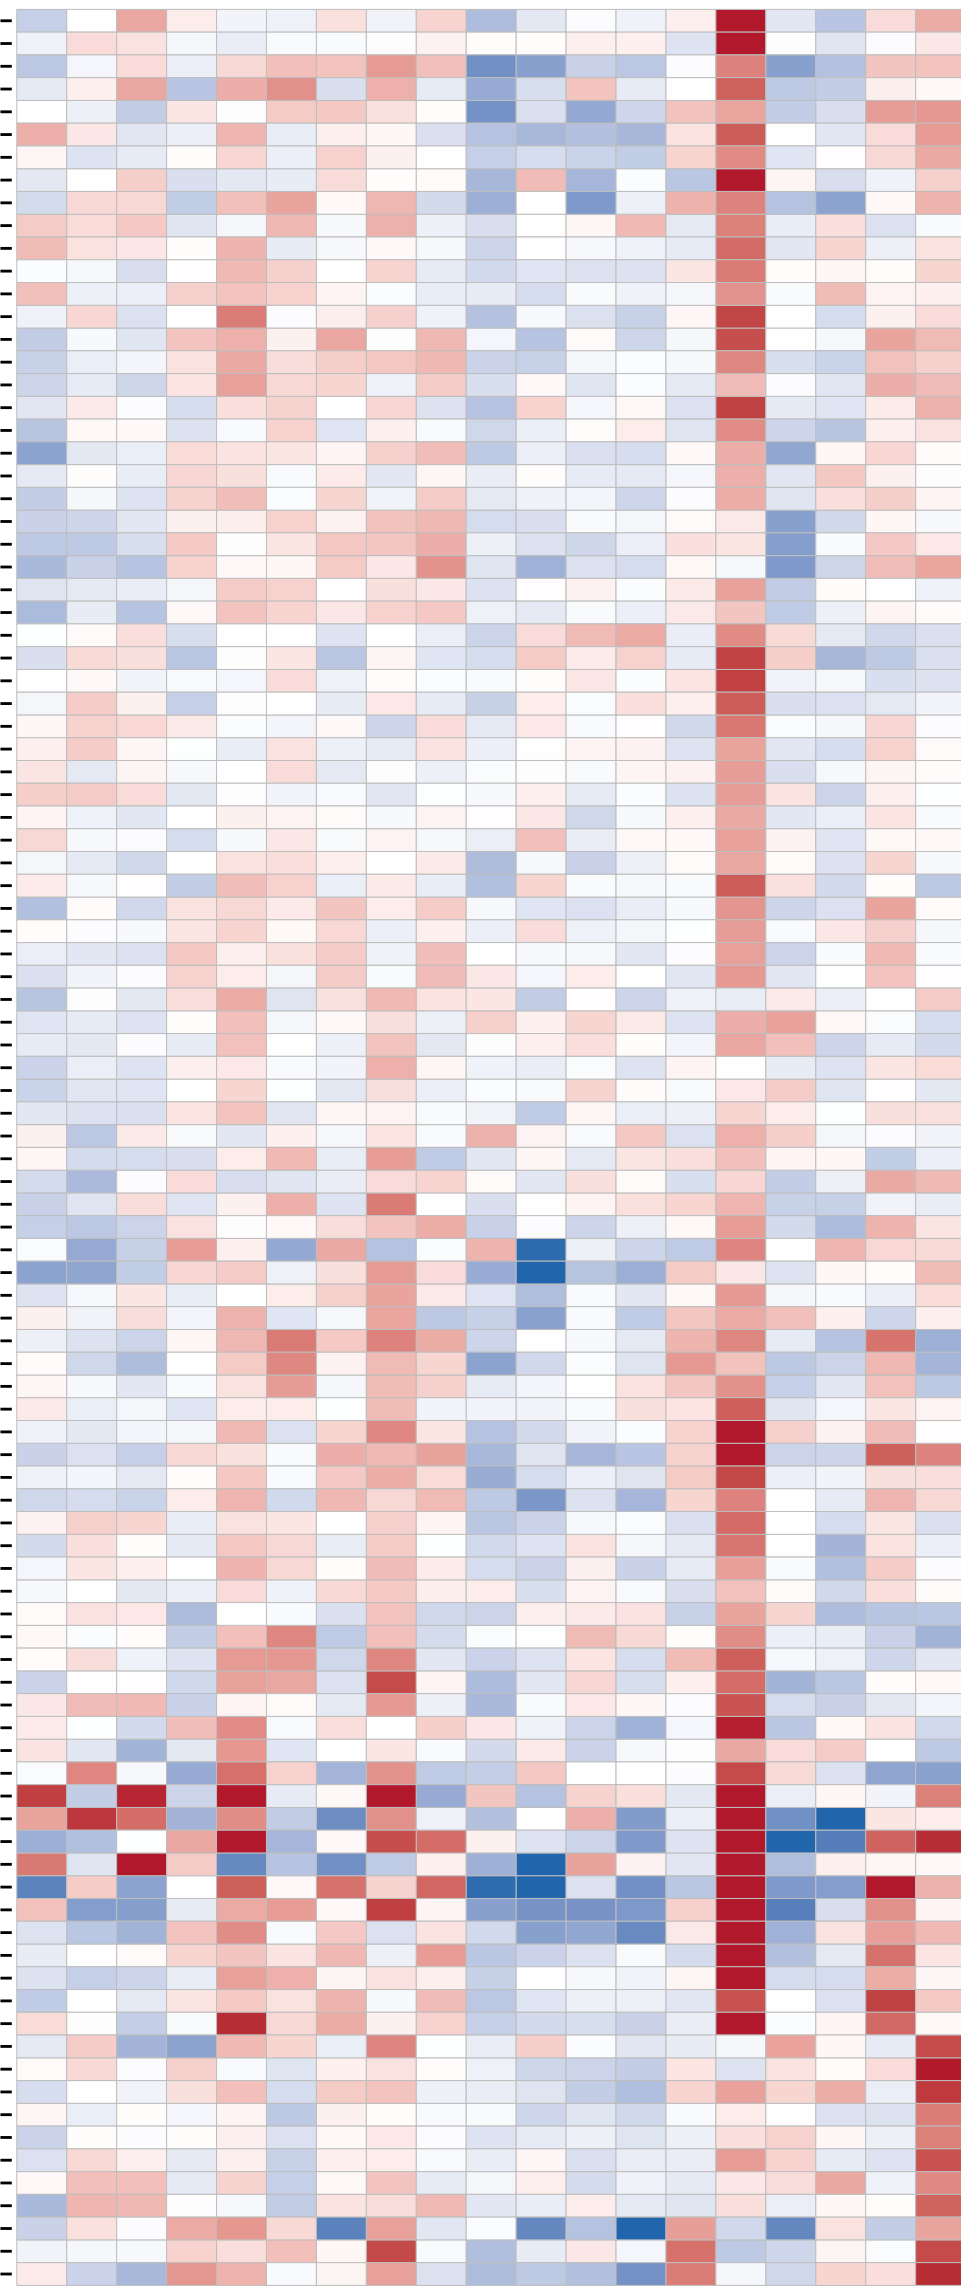

alanine -  
 aspartate -  
 glutamate -  
 phenylalanine -  
 glycine -  
 histidine -  
 isoleucine -  
 lysine -  
 leucine -  
 methionine -  
 asparagine -  
 proline -  
 glutamine -  
 arginine -  
 serine -  
 threonine -  
 valine -  
 tryptophan -  
 tyrosine -

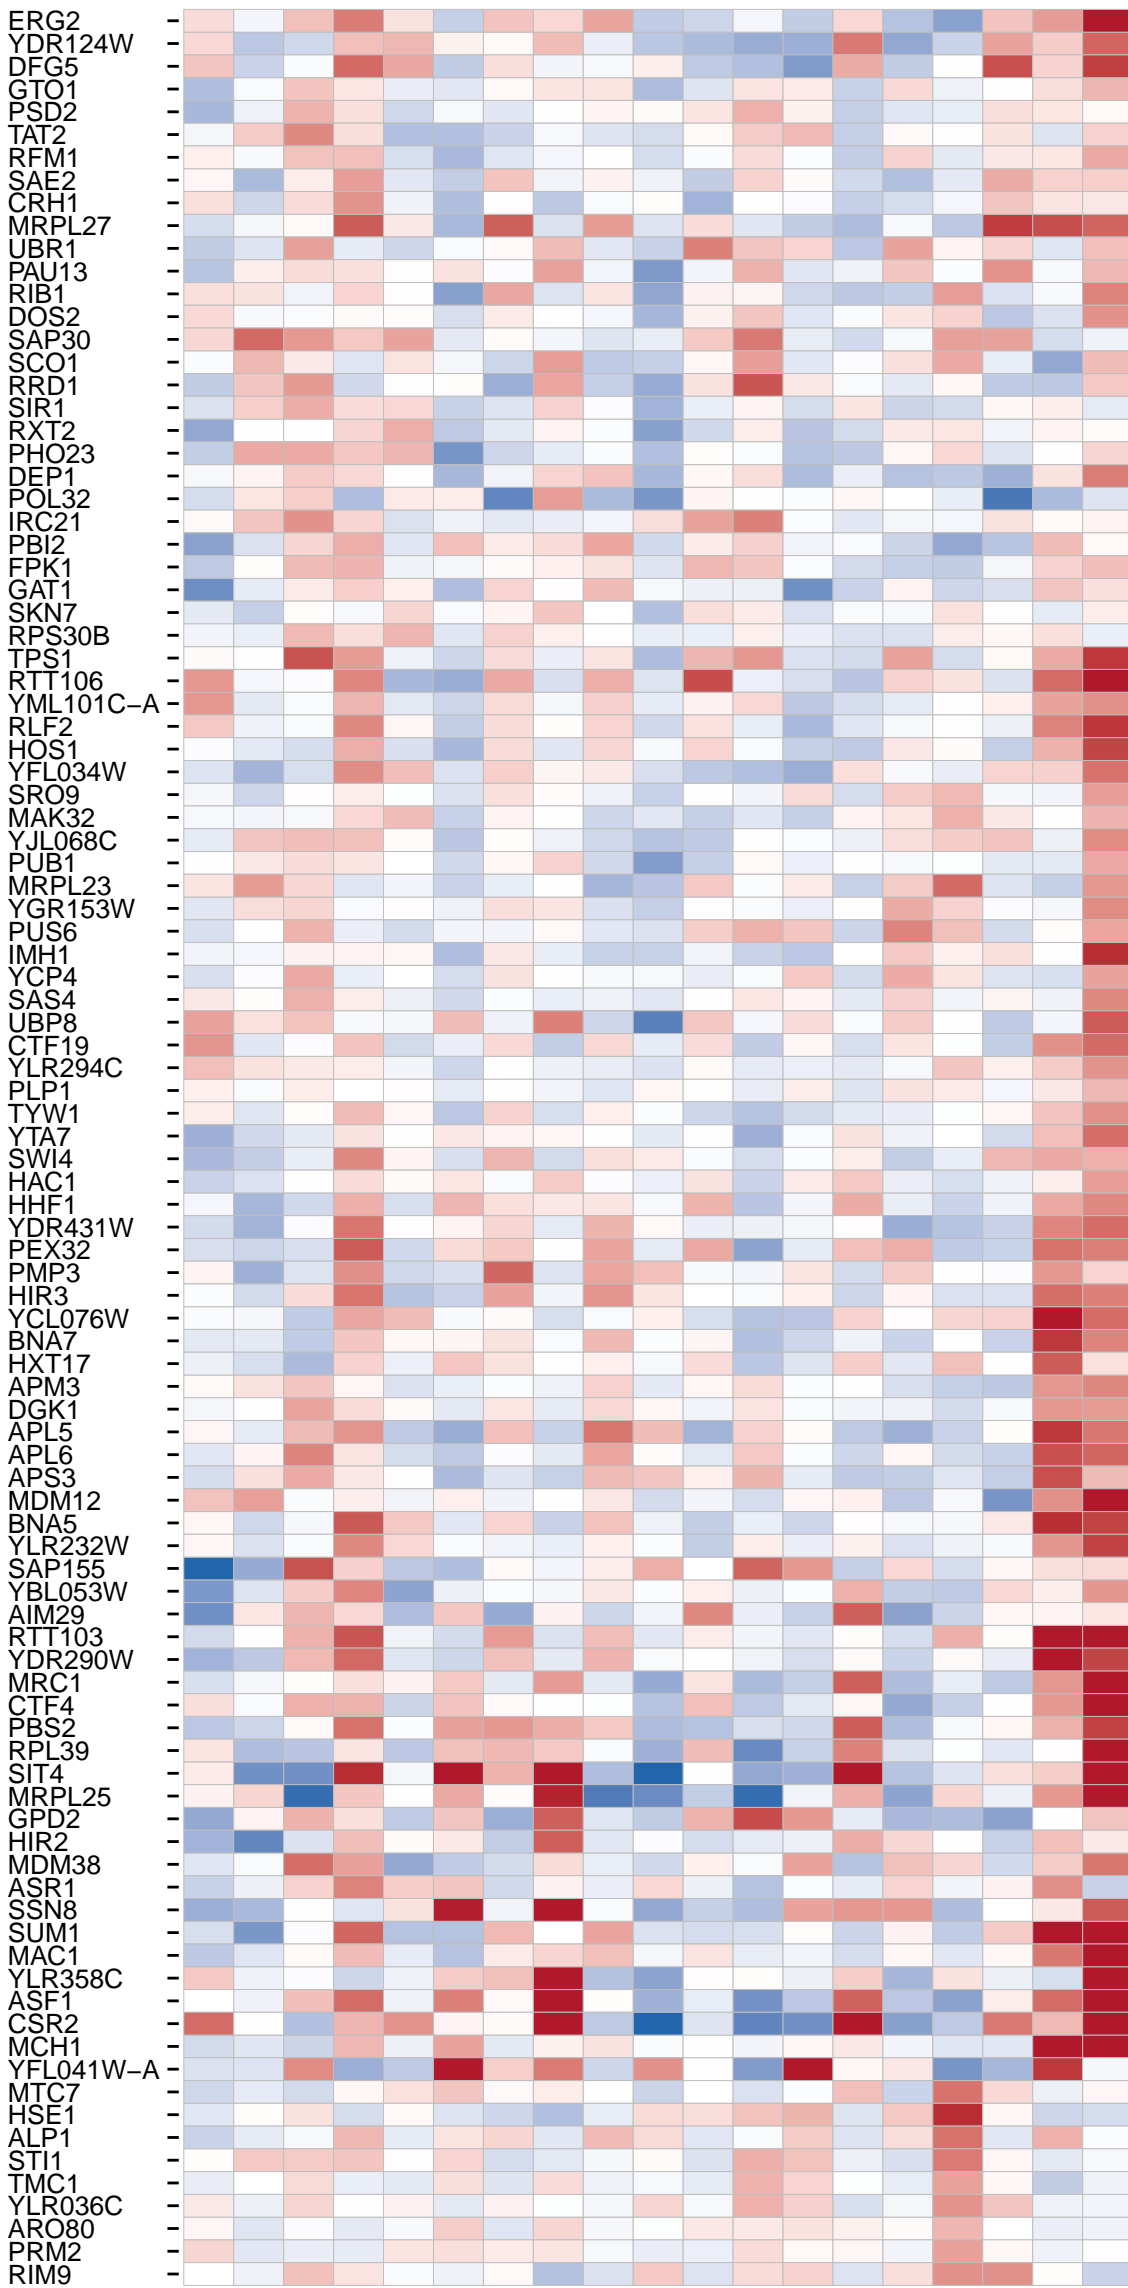

alanine -  
aspartate -  
glutamate -  
phenylalanine -  
glycine -  
histidine -  
isoleucine -  
lysine -  
leucine -  
methionine -  
asparagine -  
proline -  
glutamine -  
arginine -  
serine -  
threonine -  
valine -  
tryptophan -  
tyrosine -

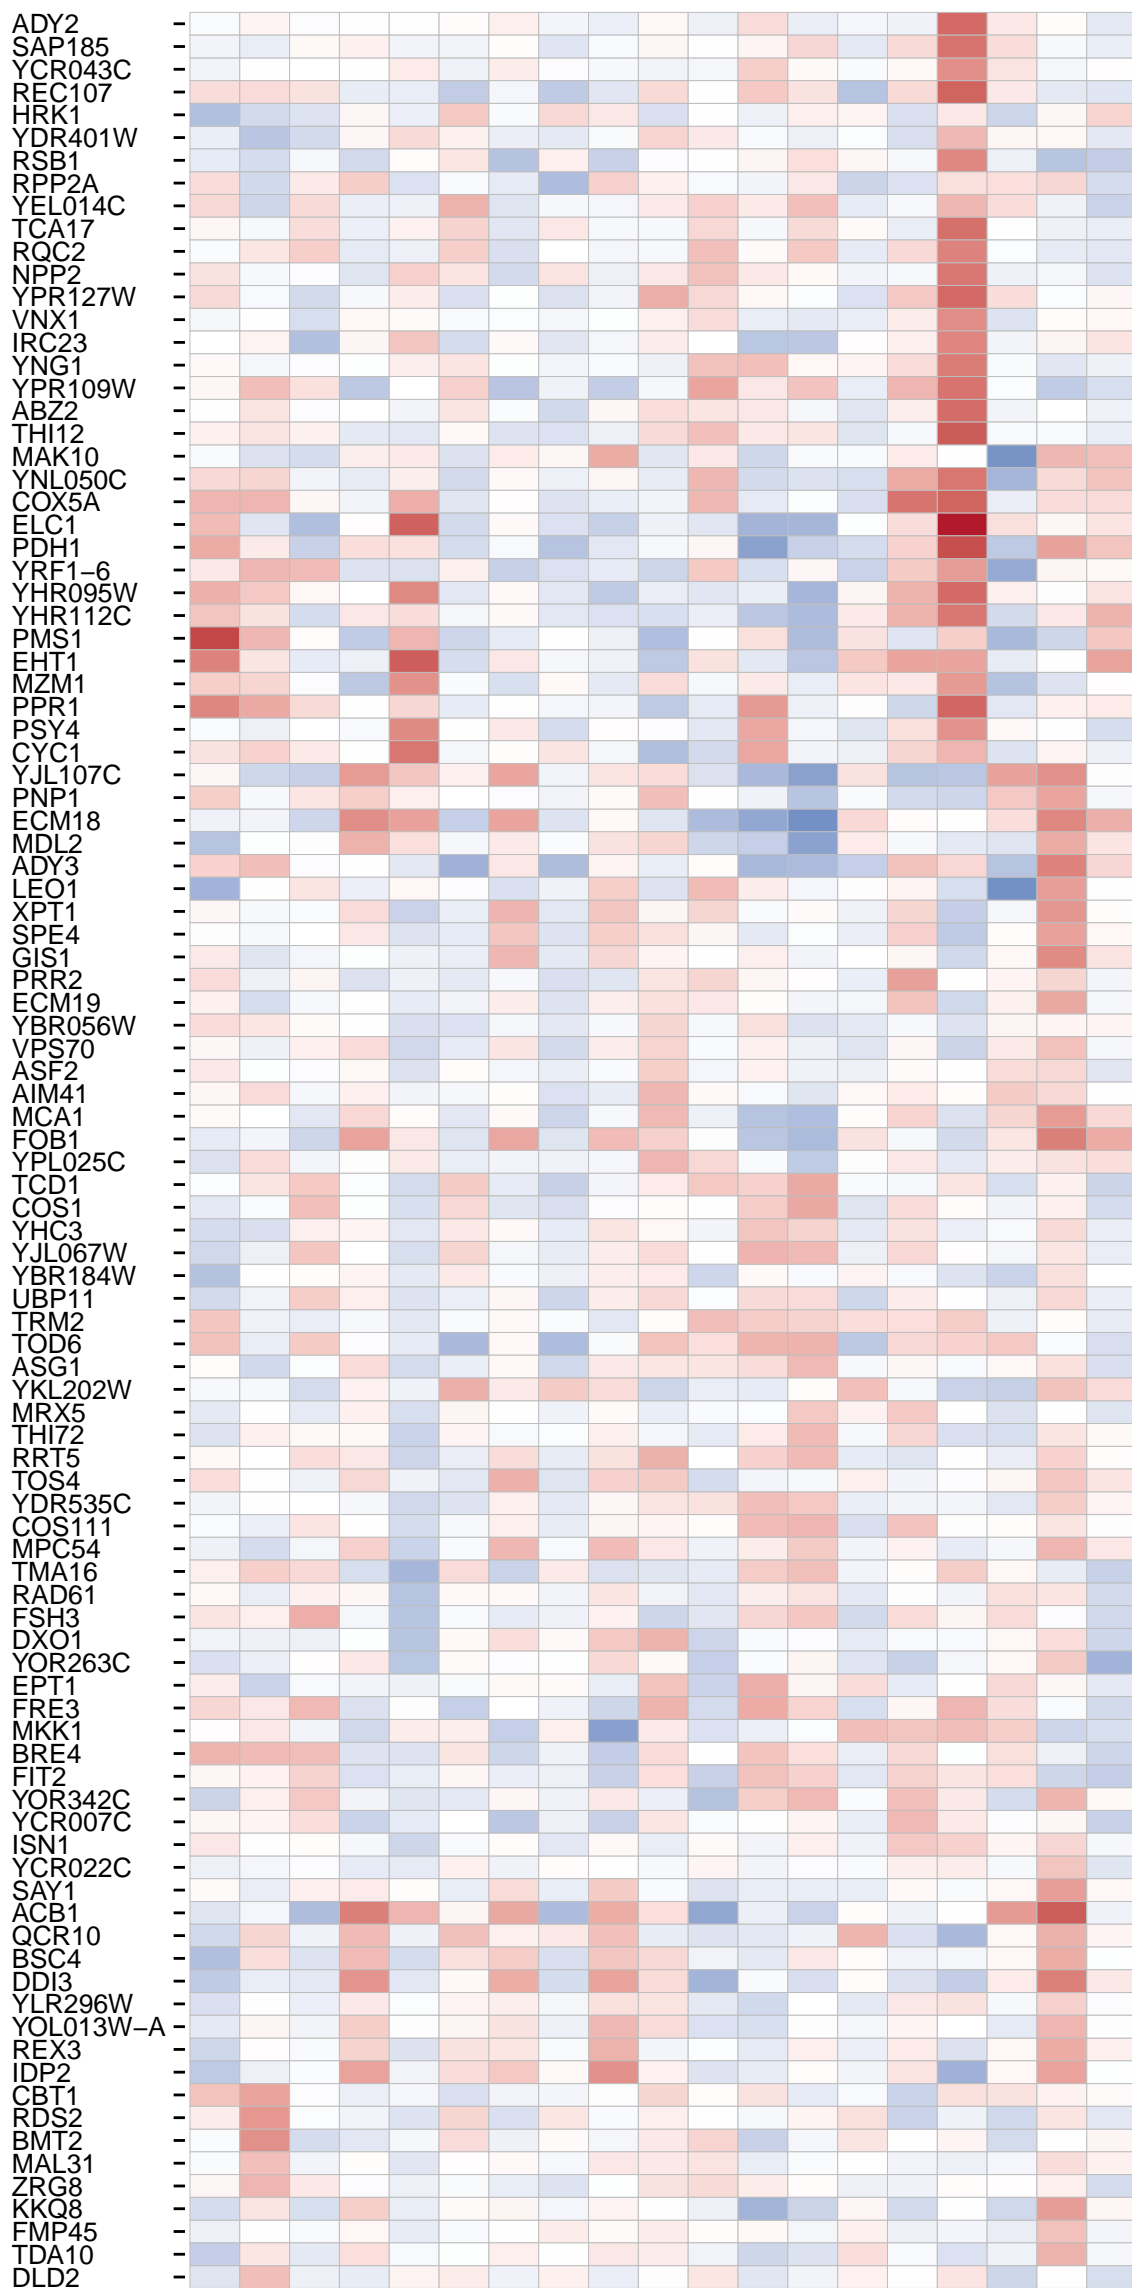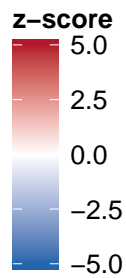

alanine -  
aspartate -  
glutamate -  
phenylalanine -  
glycine -  
histidine -  
isoleucine -  
lysine -  
leucine -  
methionine -  
asparagine -  
proline -  
glutamine -  
arginine -  
serine -  
threonine -  
valine -  
tryptophan -  
tyrosine -

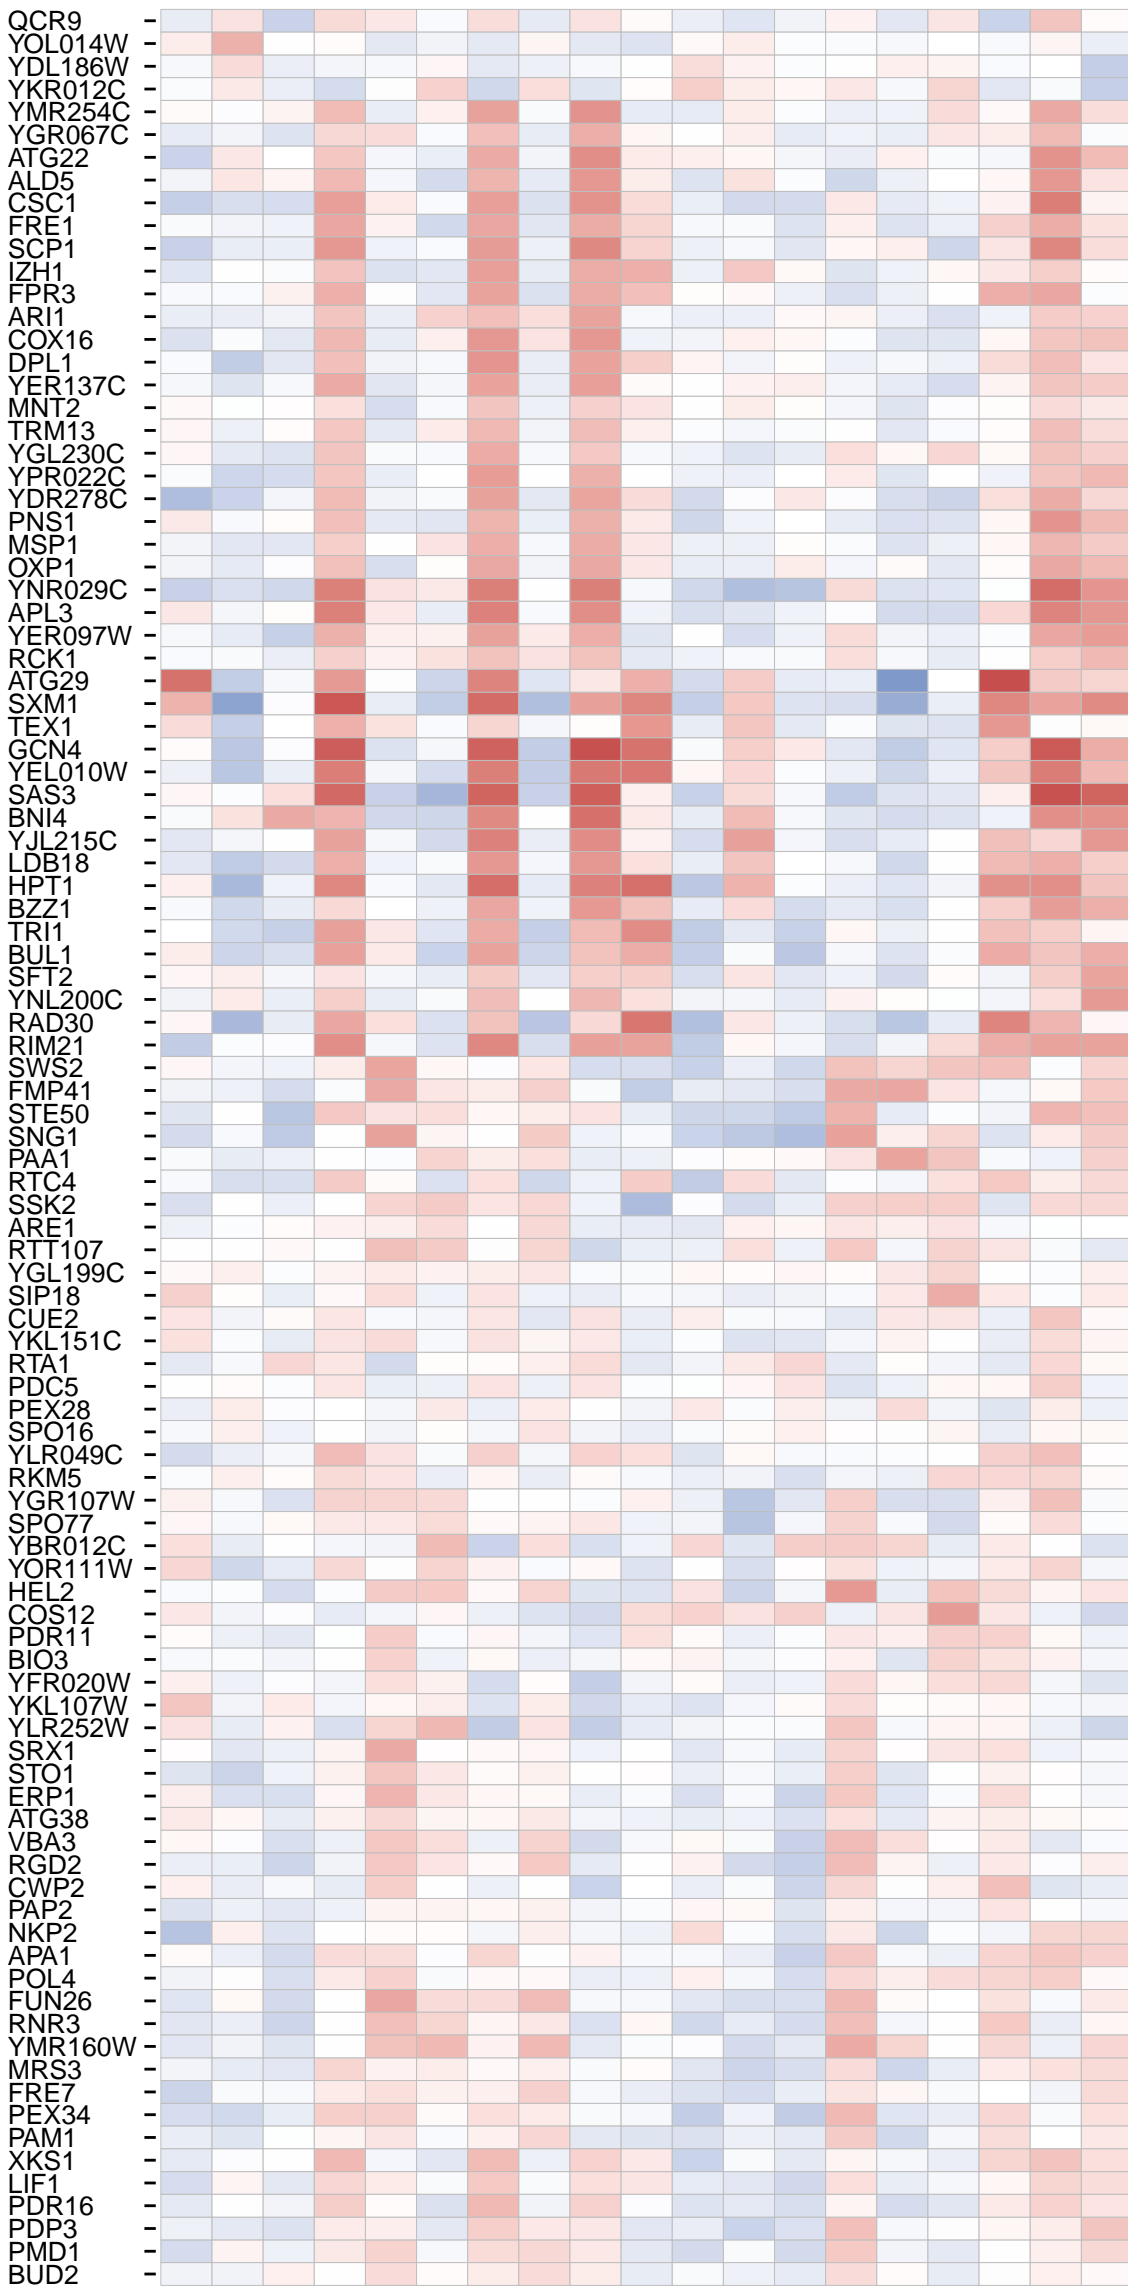

alanine -  
aspartate -  
glutamate -  
phenylalanine -  
glycine -  
histidine -  
isoleucine -  
lysine -  
leucine -  
methionine -  
asparagine -  
proline -  
glutamine -  
arginine -  
serine -  
threonine -  
valine -  
tryptophan -  
tyrosine -

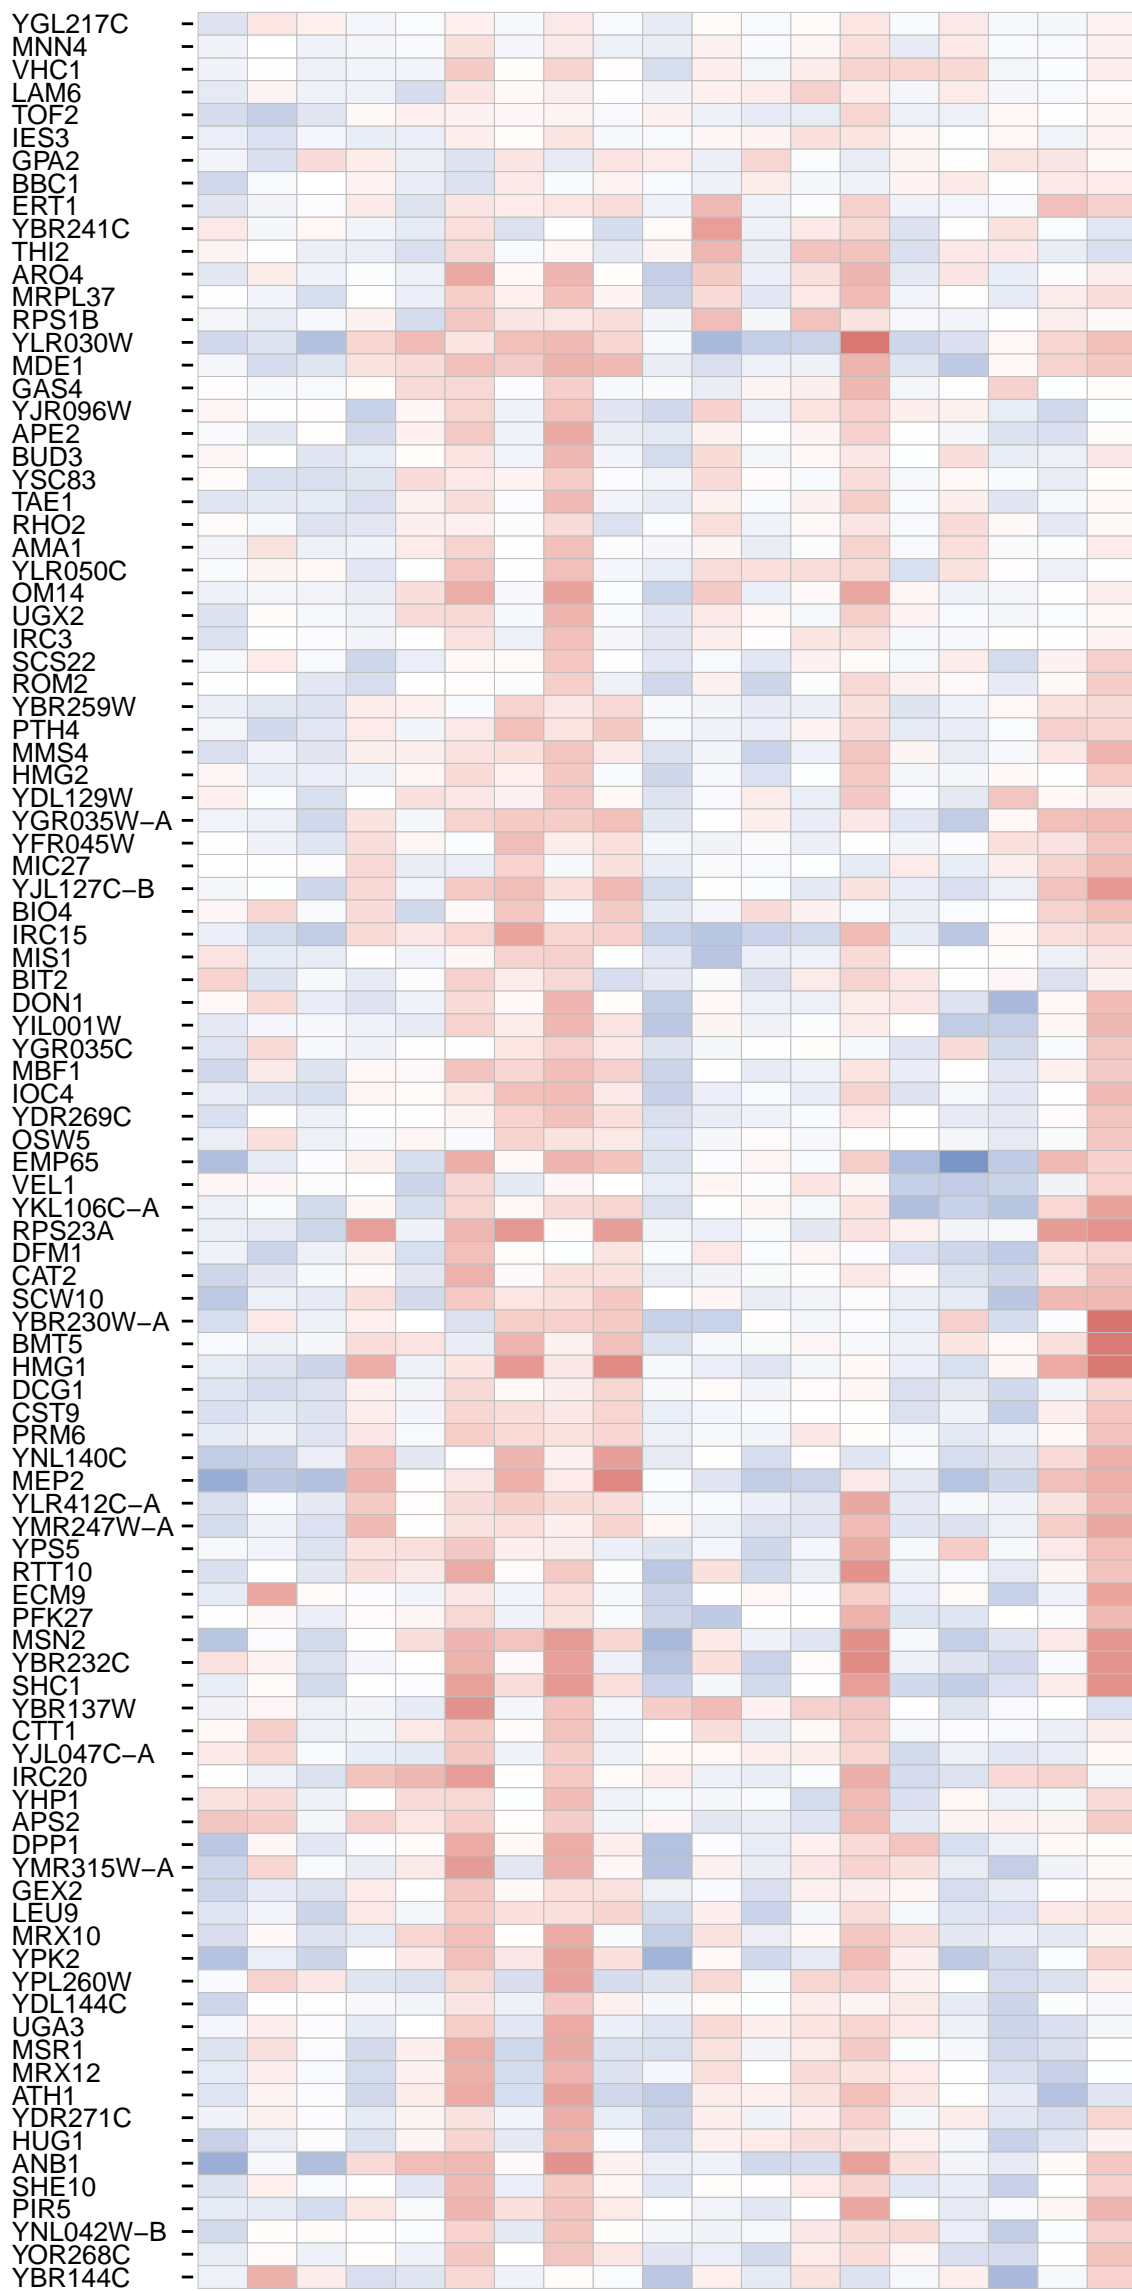

alanine -  
aspartate -  
glutamate -  
phenylalanine -  
glycine -  
histidine -  
isoleucine -  
lysine -  
leucine -  
methionine -  
asparagine -  
proline -  
glutamine -  
arginine -  
serine -  
threonine -  
valine -  
tryptophan -  
tyrosine -

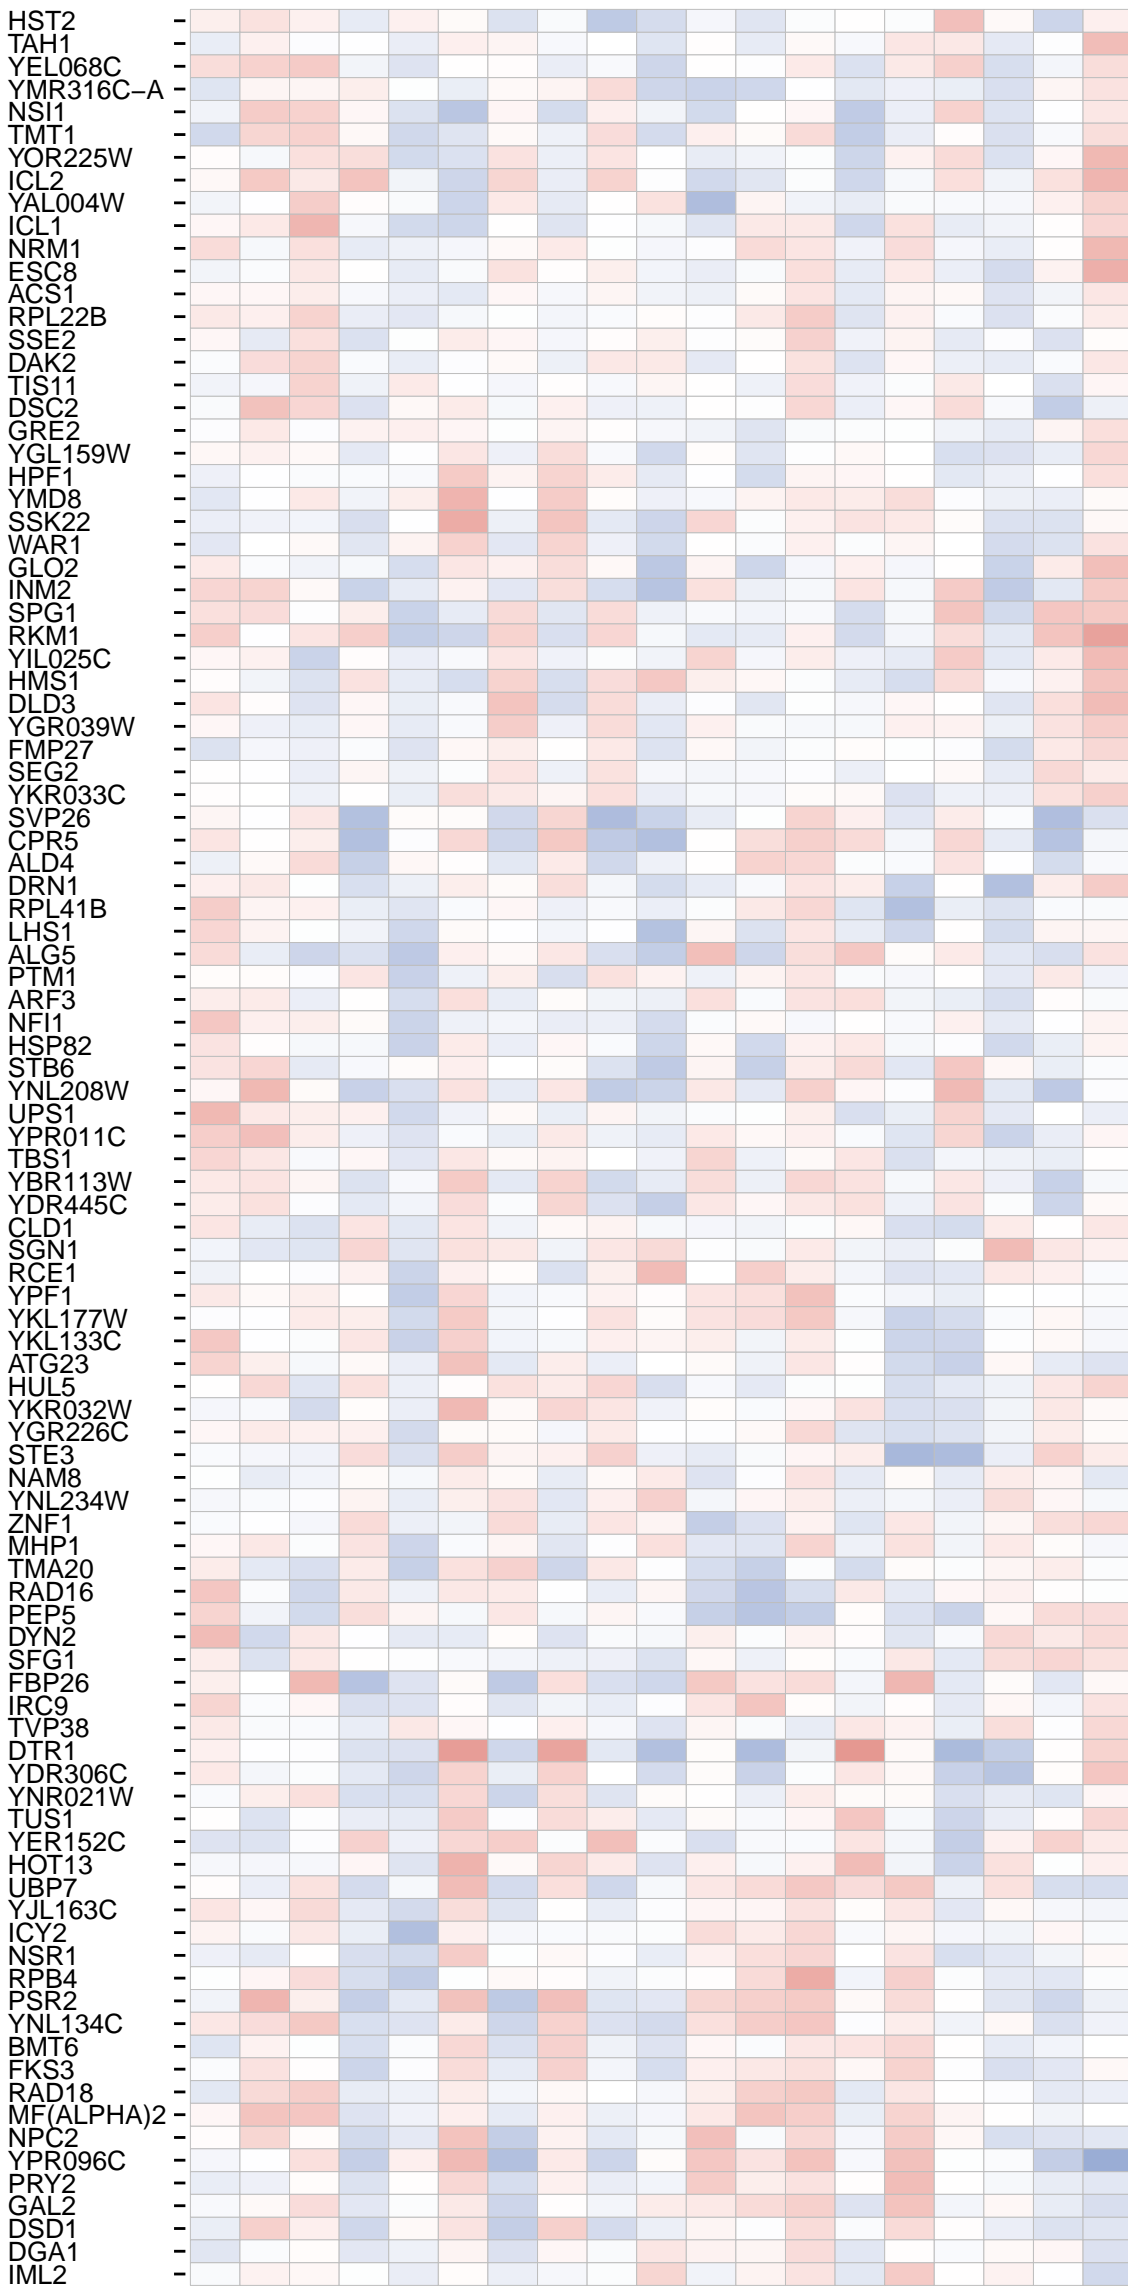

alanine -  
aspartate -  
glutamate -  
phenylalanine -  
glycine -  
histidine -  
isoleucine -  
lysine -  
leucine -  
methionine -  
asparagine -  
proline -  
glutamine -  
arginine -  
serine -  
threonine -  
valine -  
tryptophan -  
tyrosine -



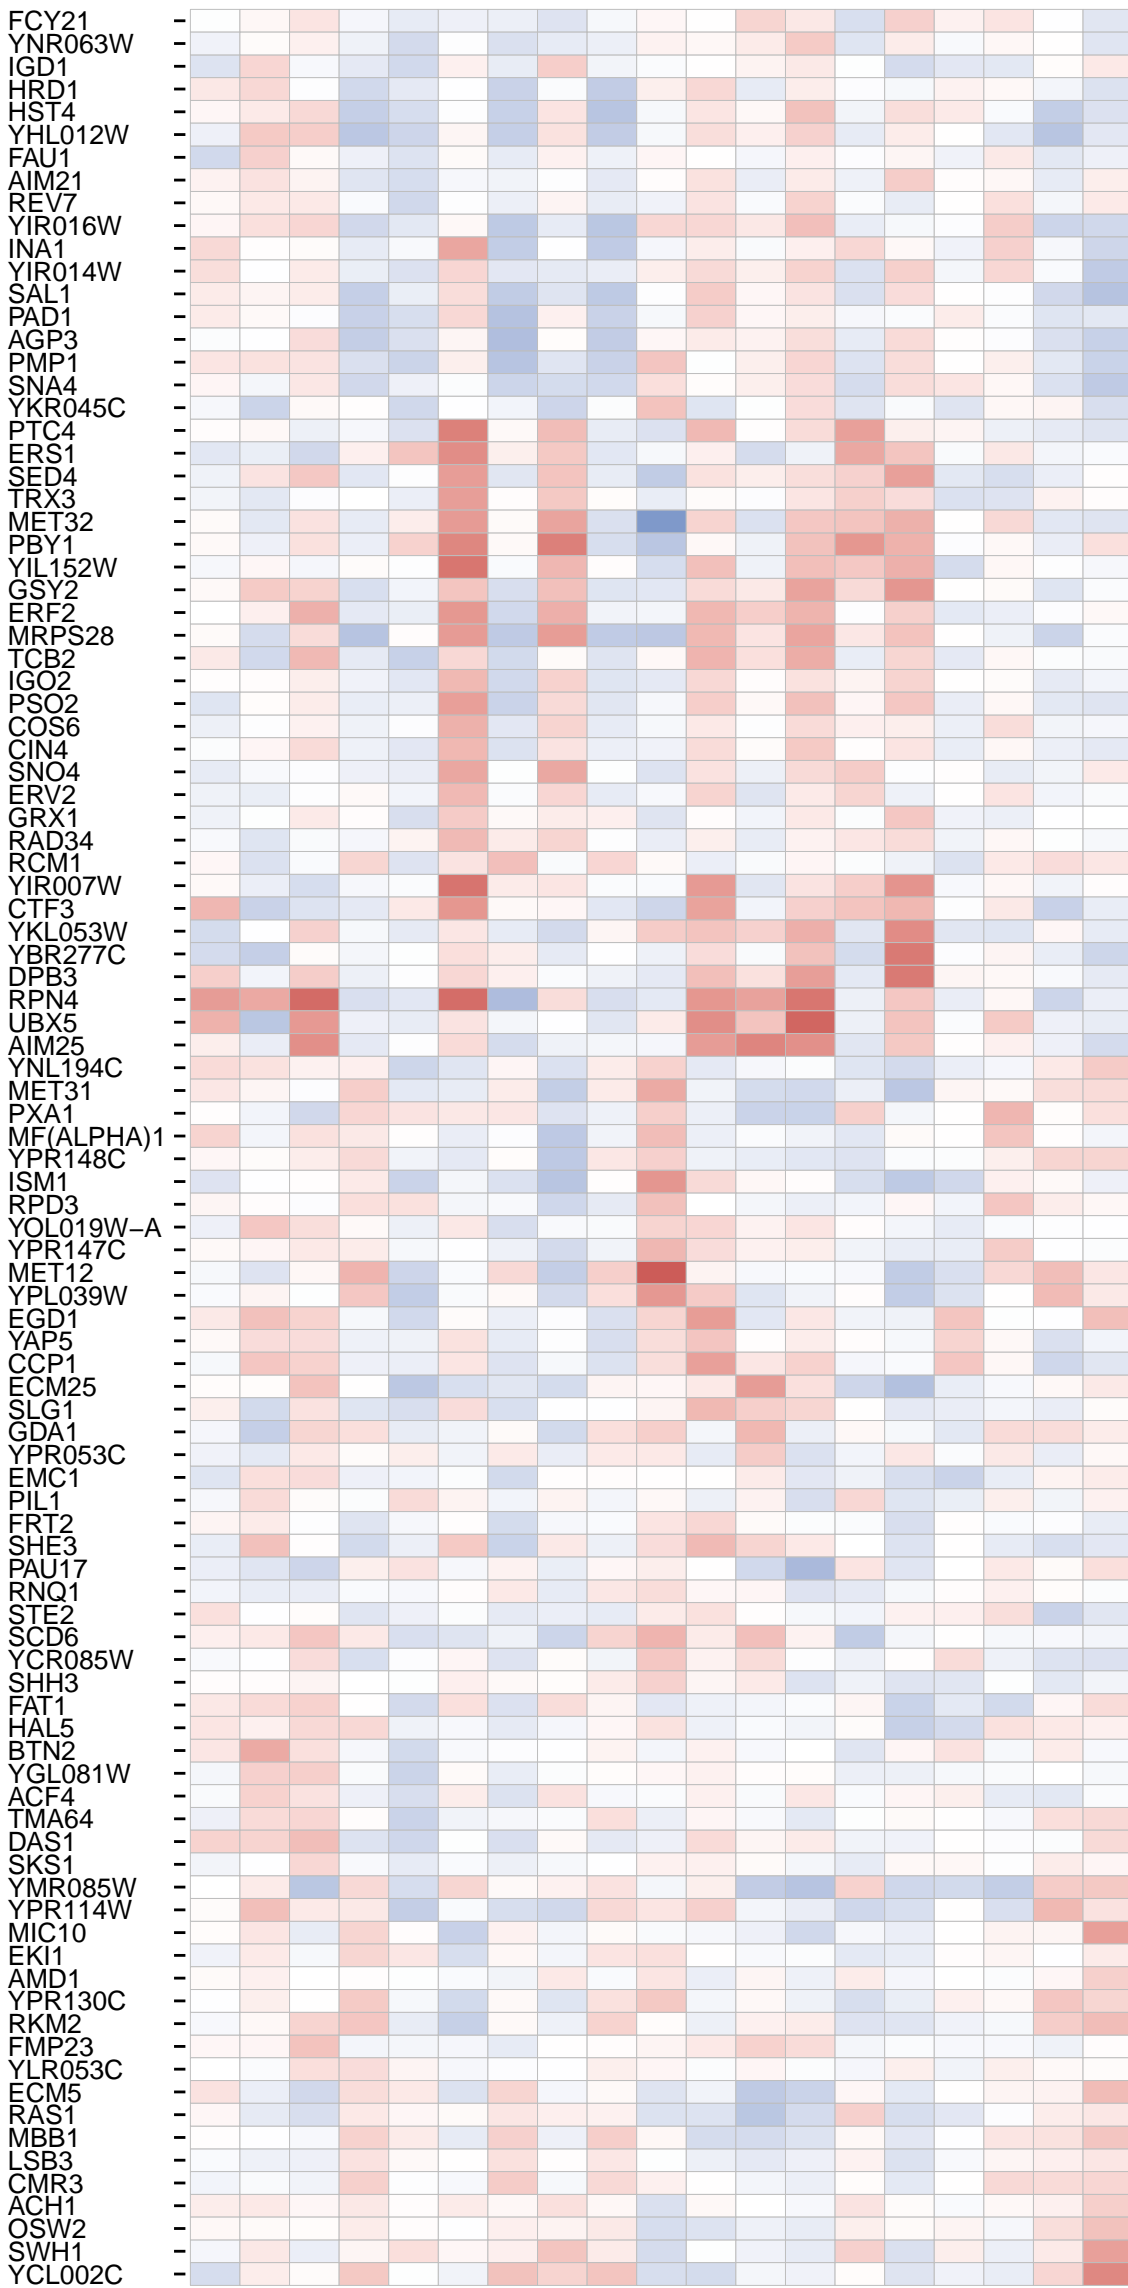

alanine -  
aspartate -  
glutamate -  
phenylalanine -  
glycine -  
histidine -  
isoleucine -  
lysine -  
leucine -  
methionine -  
asparagine -  
proline -  
glutamine -  
arginine -  
serine -  
threonine -  
valine -  
tryptophan -  
tyrosine -

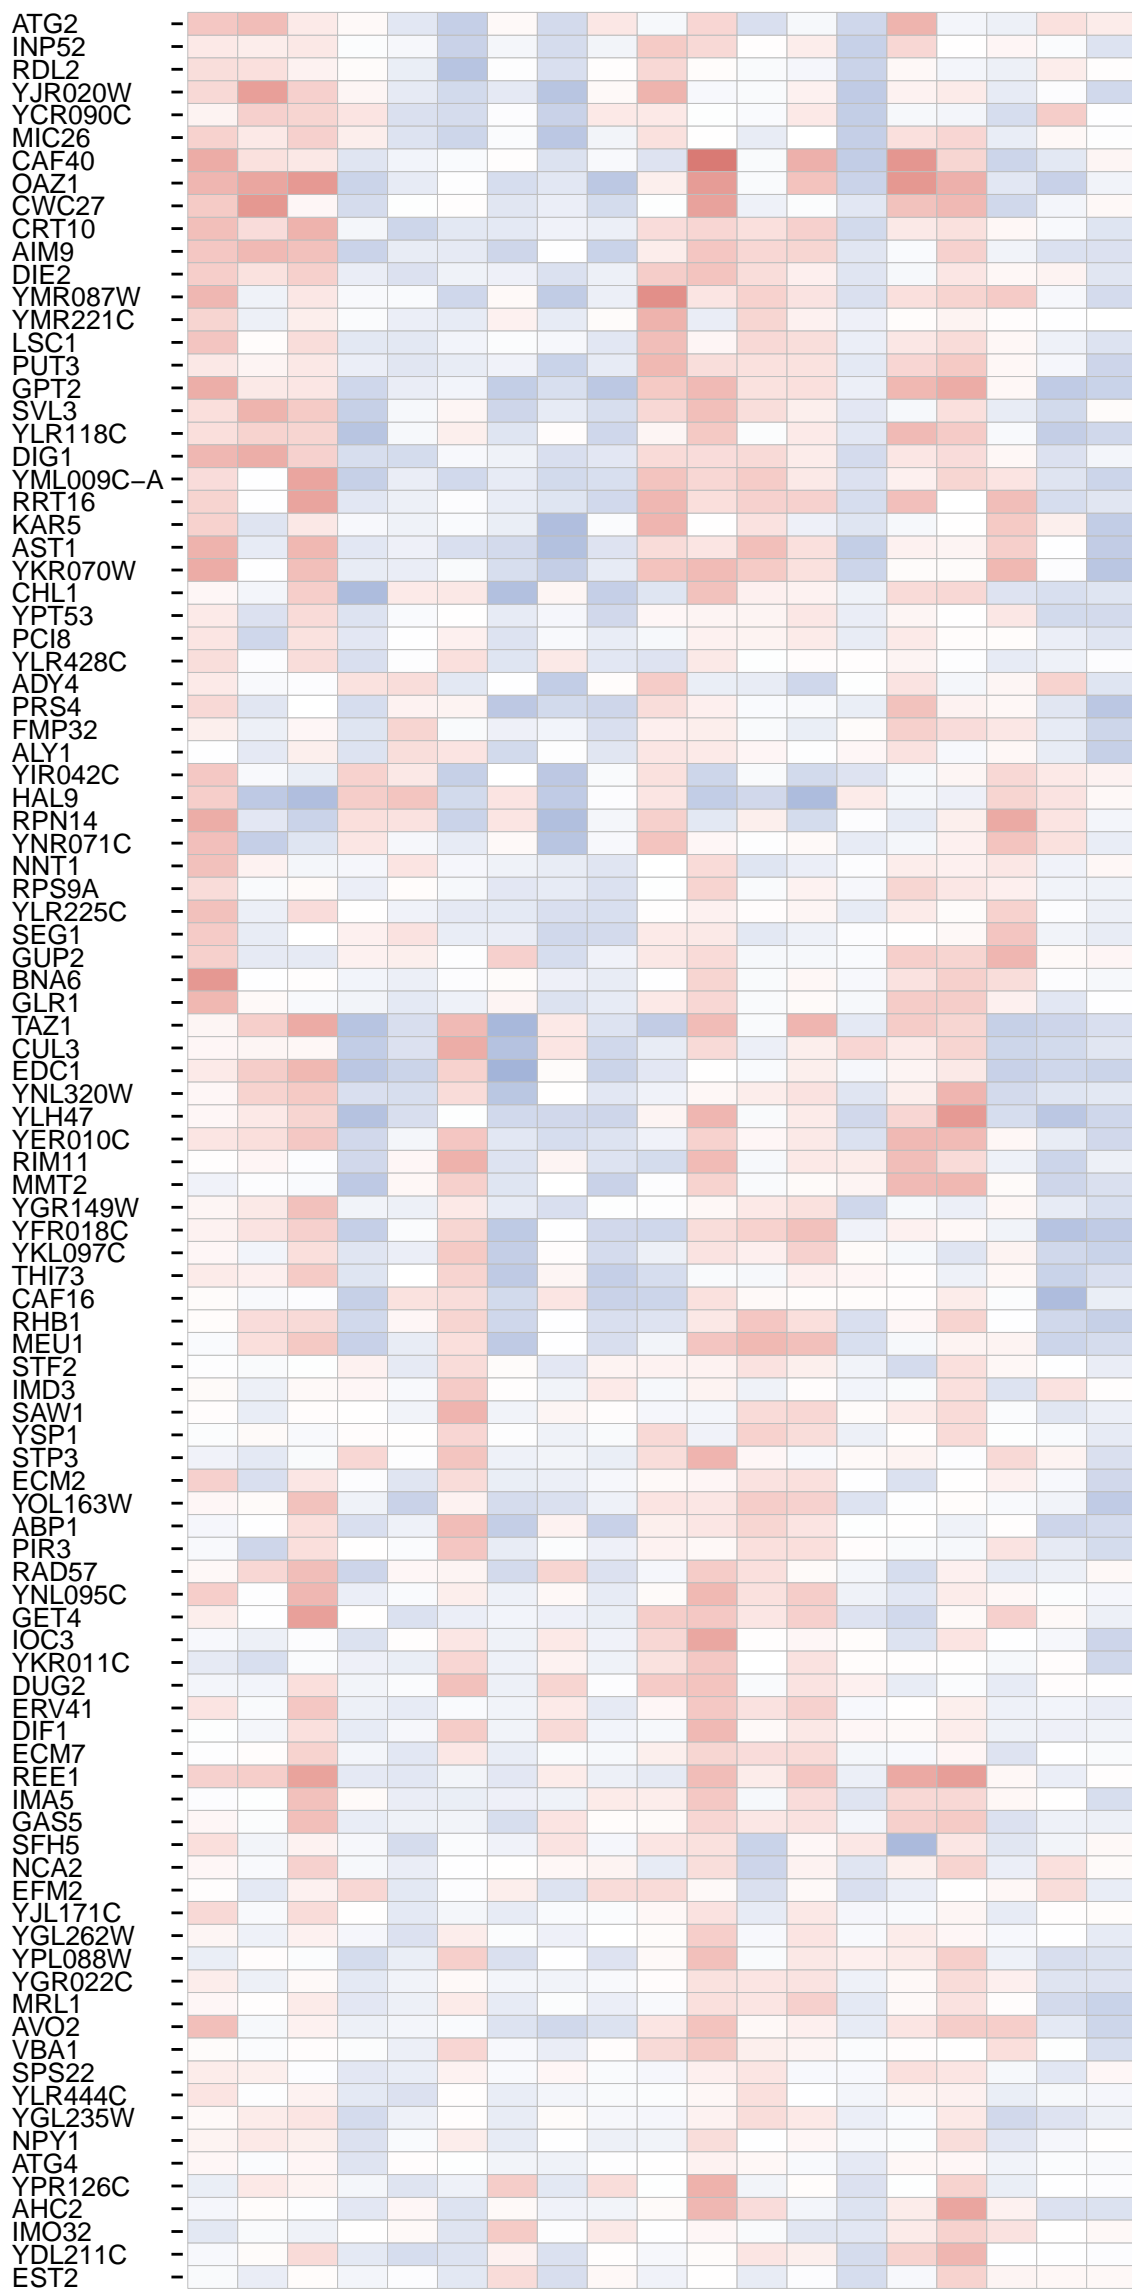

alanine -  
aspartate -  
glutamate -  
phenylalanine -  
glycine -  
histidine -  
isoleucine -  
lysine -  
leucine -  
methionine -  
asparagine -  
proline -  
glutamine -  
arginine -  
serine -  
threonine -  
valine -  
tryptophan -  
tyrosine -

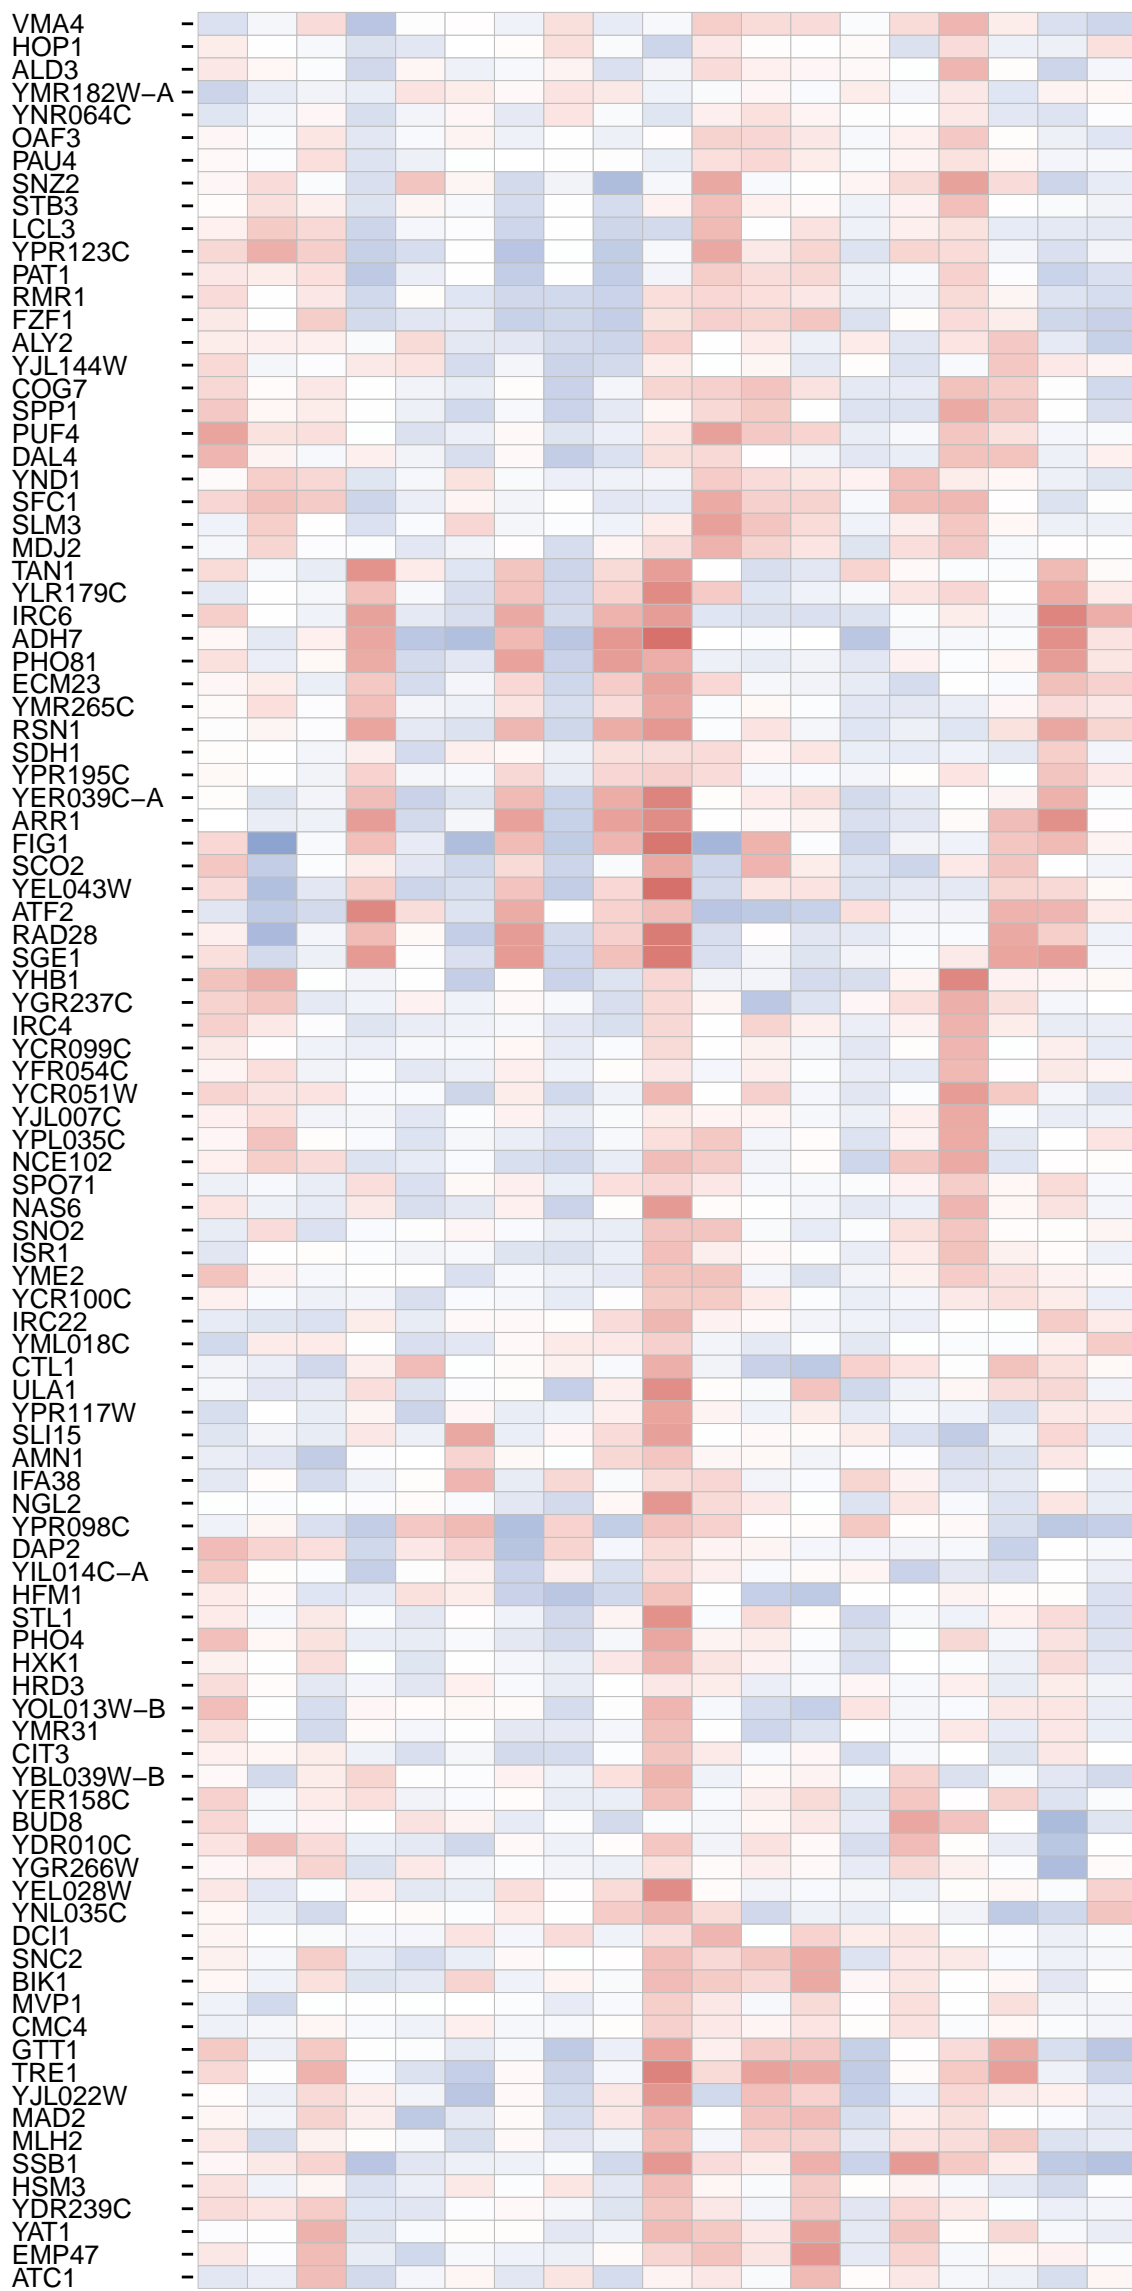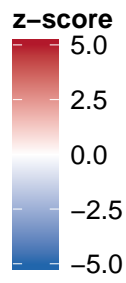

alanine -  
aspartate -  
glutamate -  
phenylalanine -  
glycine -  
histidine -  
isoleucine -  
lysine -  
leucine -  
methionine -  
asparagine -  
proline -  
glutamine -  
arginine -  
serine -  
threonine -  
valine -  
tryptophan -  
tyrosine -

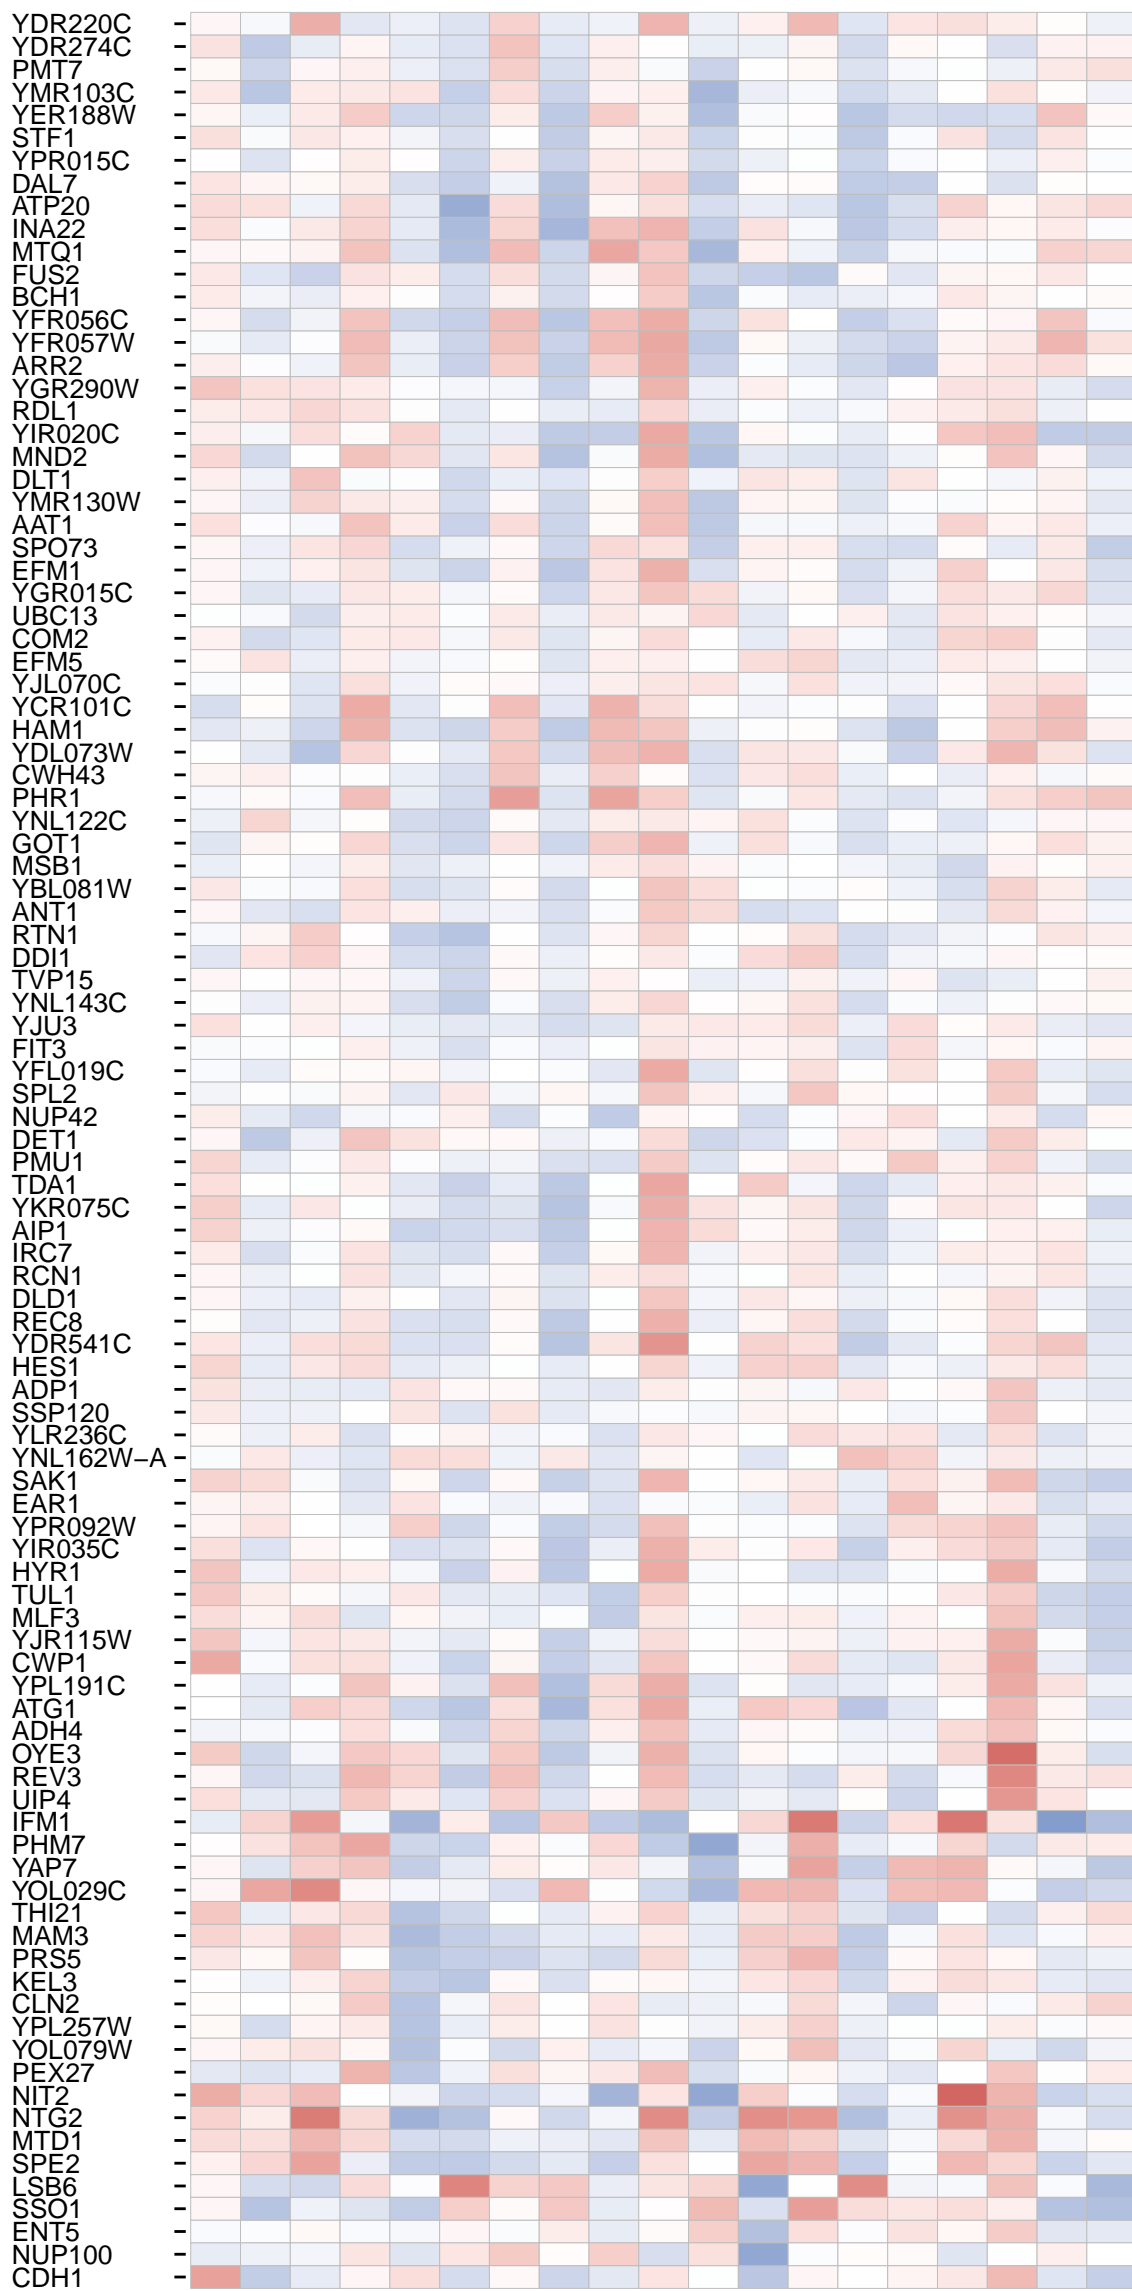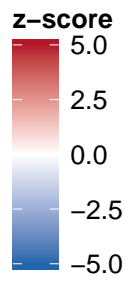

alanine -  
aspartate -  
glutamate -  
phenylalanine -  
glycine -  
histidine -  
isoleucine -  
lysine -  
leucine -  
methionine -  
asparagine -  
proline -  
glutamine -  
arginine -  
serine -  
threonine -  
valine -  
tryptophan -  
tyrosine -

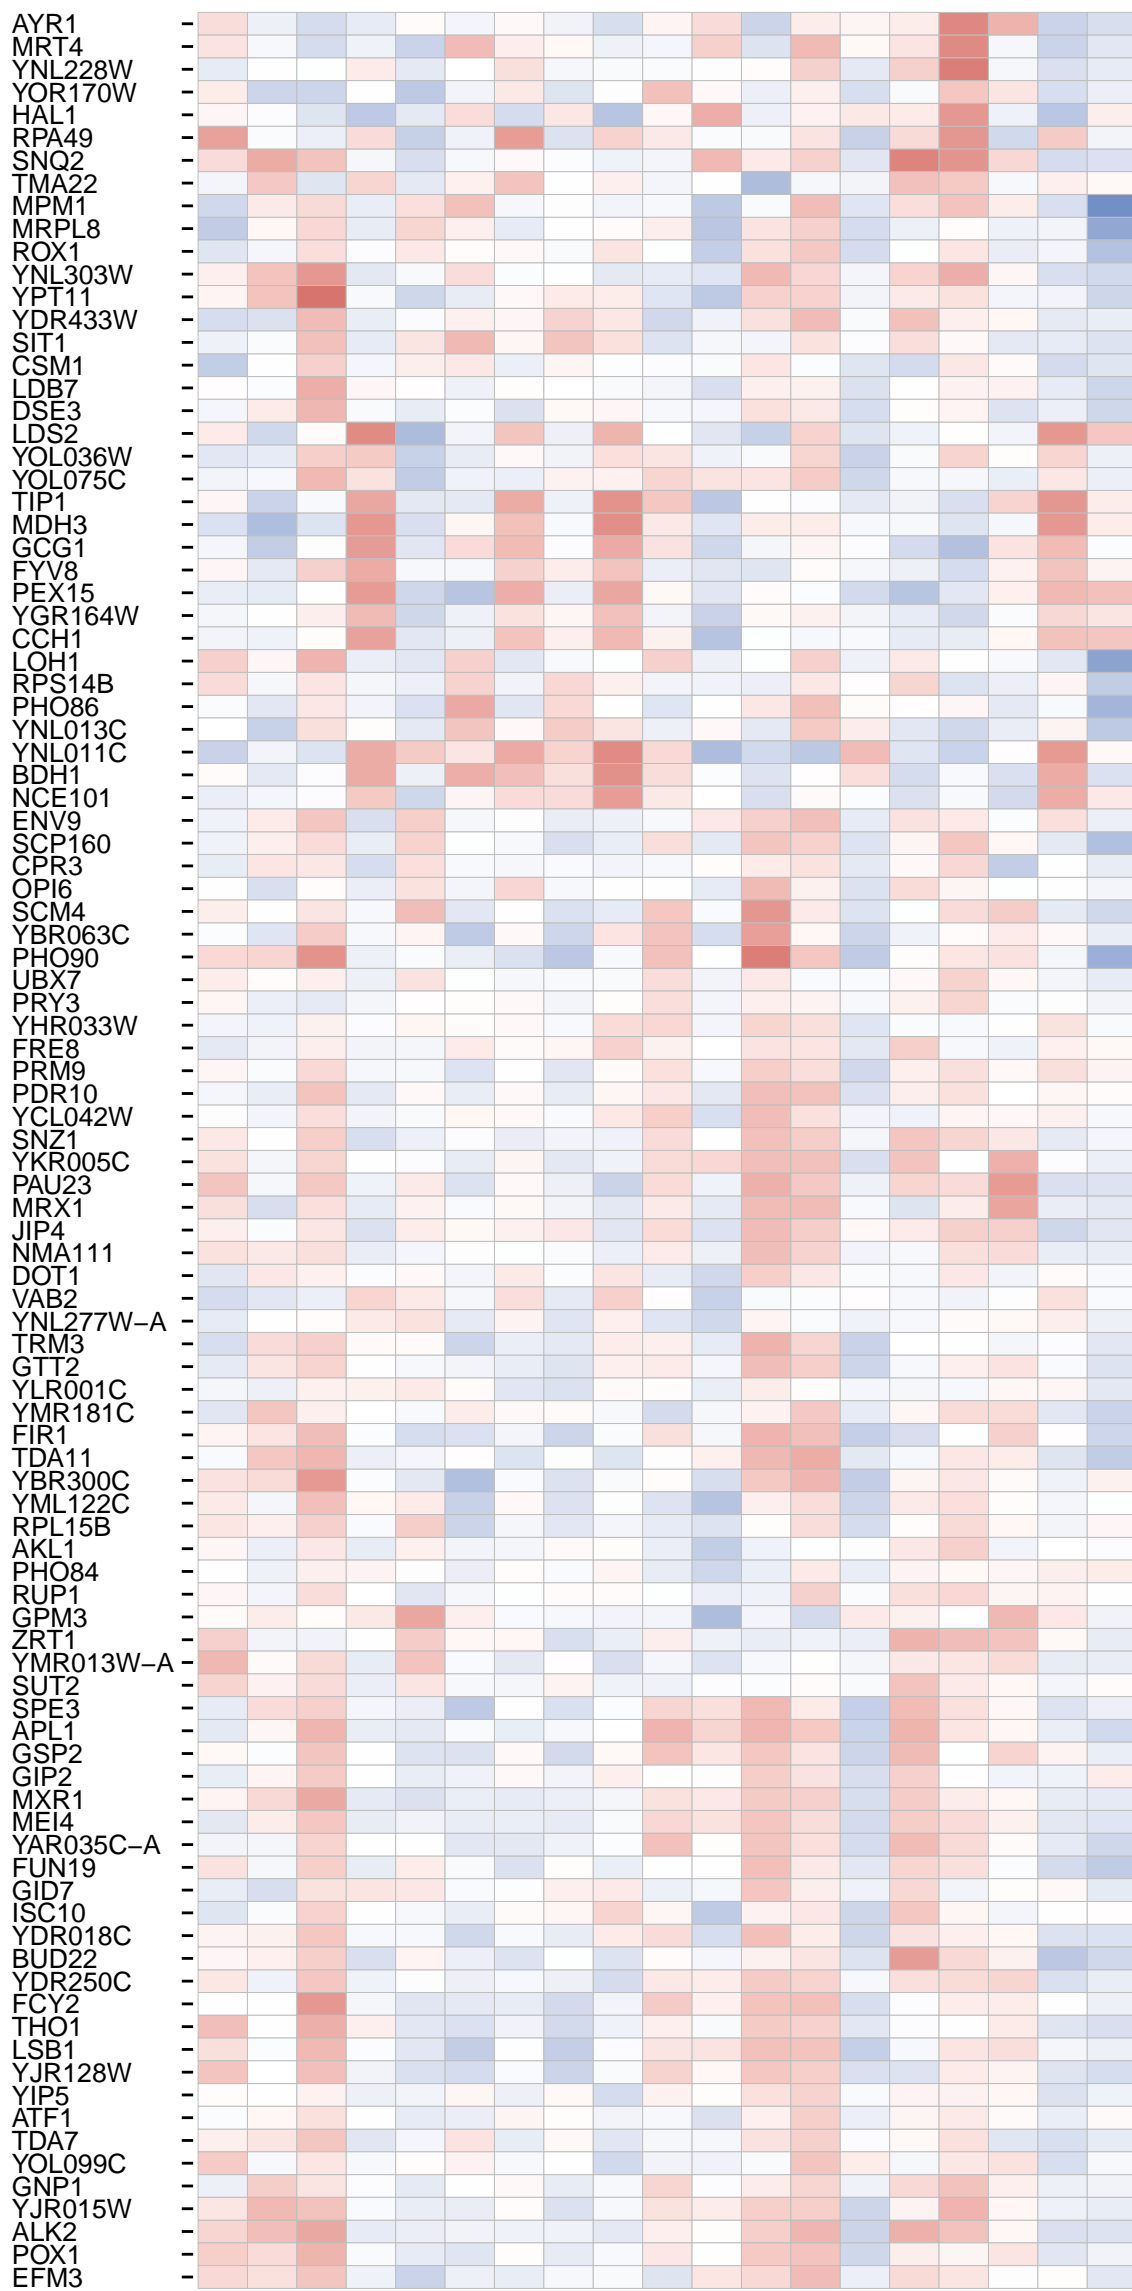

alanine -  
aspartate -  
glutamate -  
phenylalanine -  
glycine -  
histidine -  
isoleucine -  
lysine -  
leucine -  
methionine -  
asparagine -  
proline -  
glutamine -  
arginine -  
serine -  
threonine -  
valine -  
tryptophan -  
tyrosine -

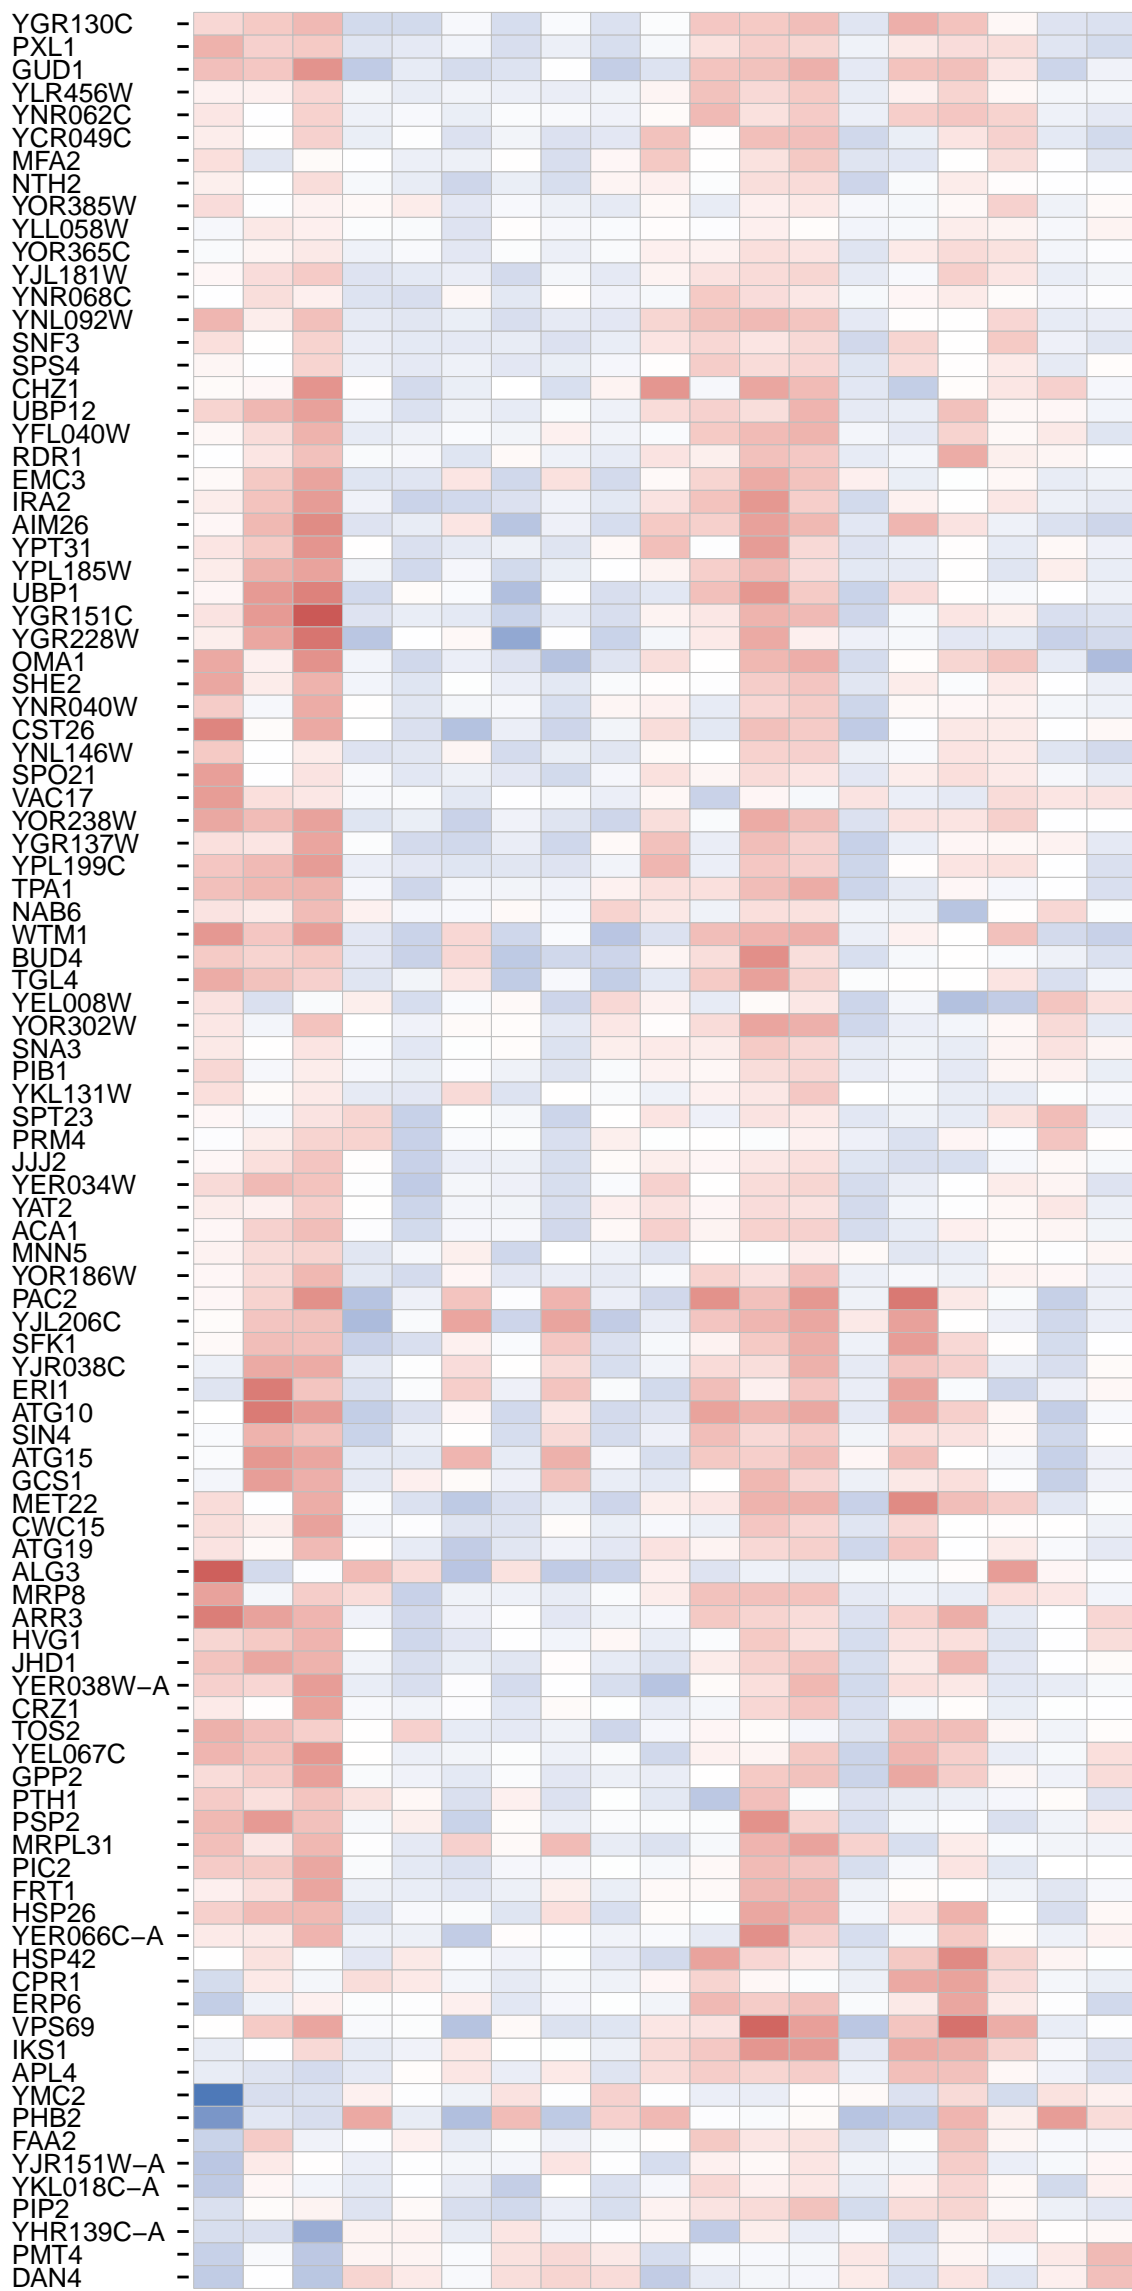

alanine -  
aspartate -  
glutamate -  
phenylalanine -  
glycine -  
histidine -  
isoleucine -  
lysine -  
leucine -  
methionine -  
asparagine -  
proline -  
glutamine -  
arginine -  
serine -  
threonine -  
valine -  
tryptophan -  
tyrosine -

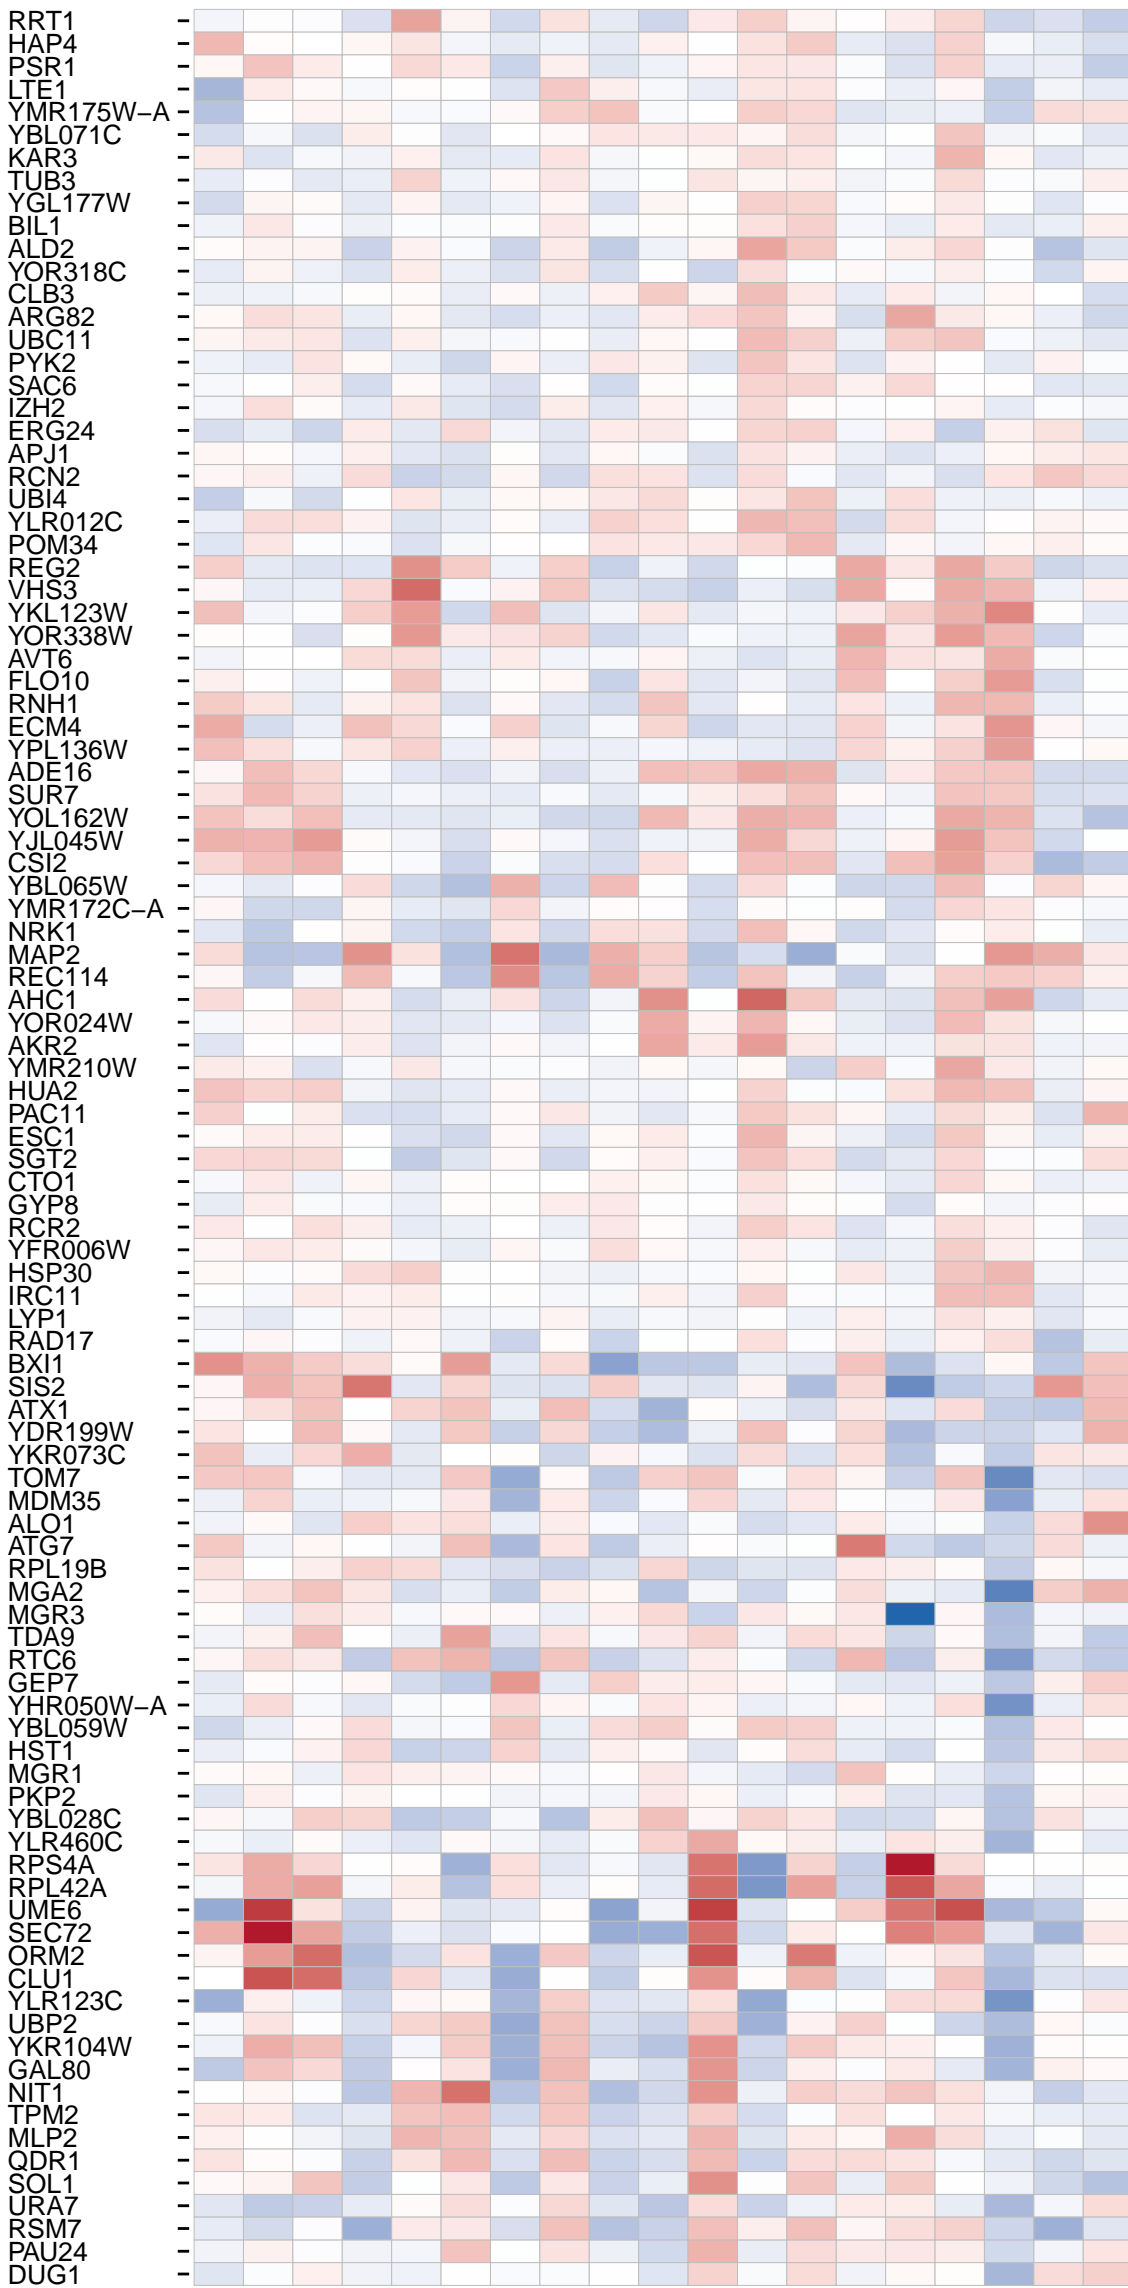

alanine -  
aspartate -  
glutamate -  
phenylalanine -  
glycine -  
histidine -  
isoleucine -  
lysine -  
leucine -  
methionine -  
asparagine -  
proline -  
glutamine -  
arginine -  
serine -  
threonine -  
valine -  
tryptophan -  
tyrosine -





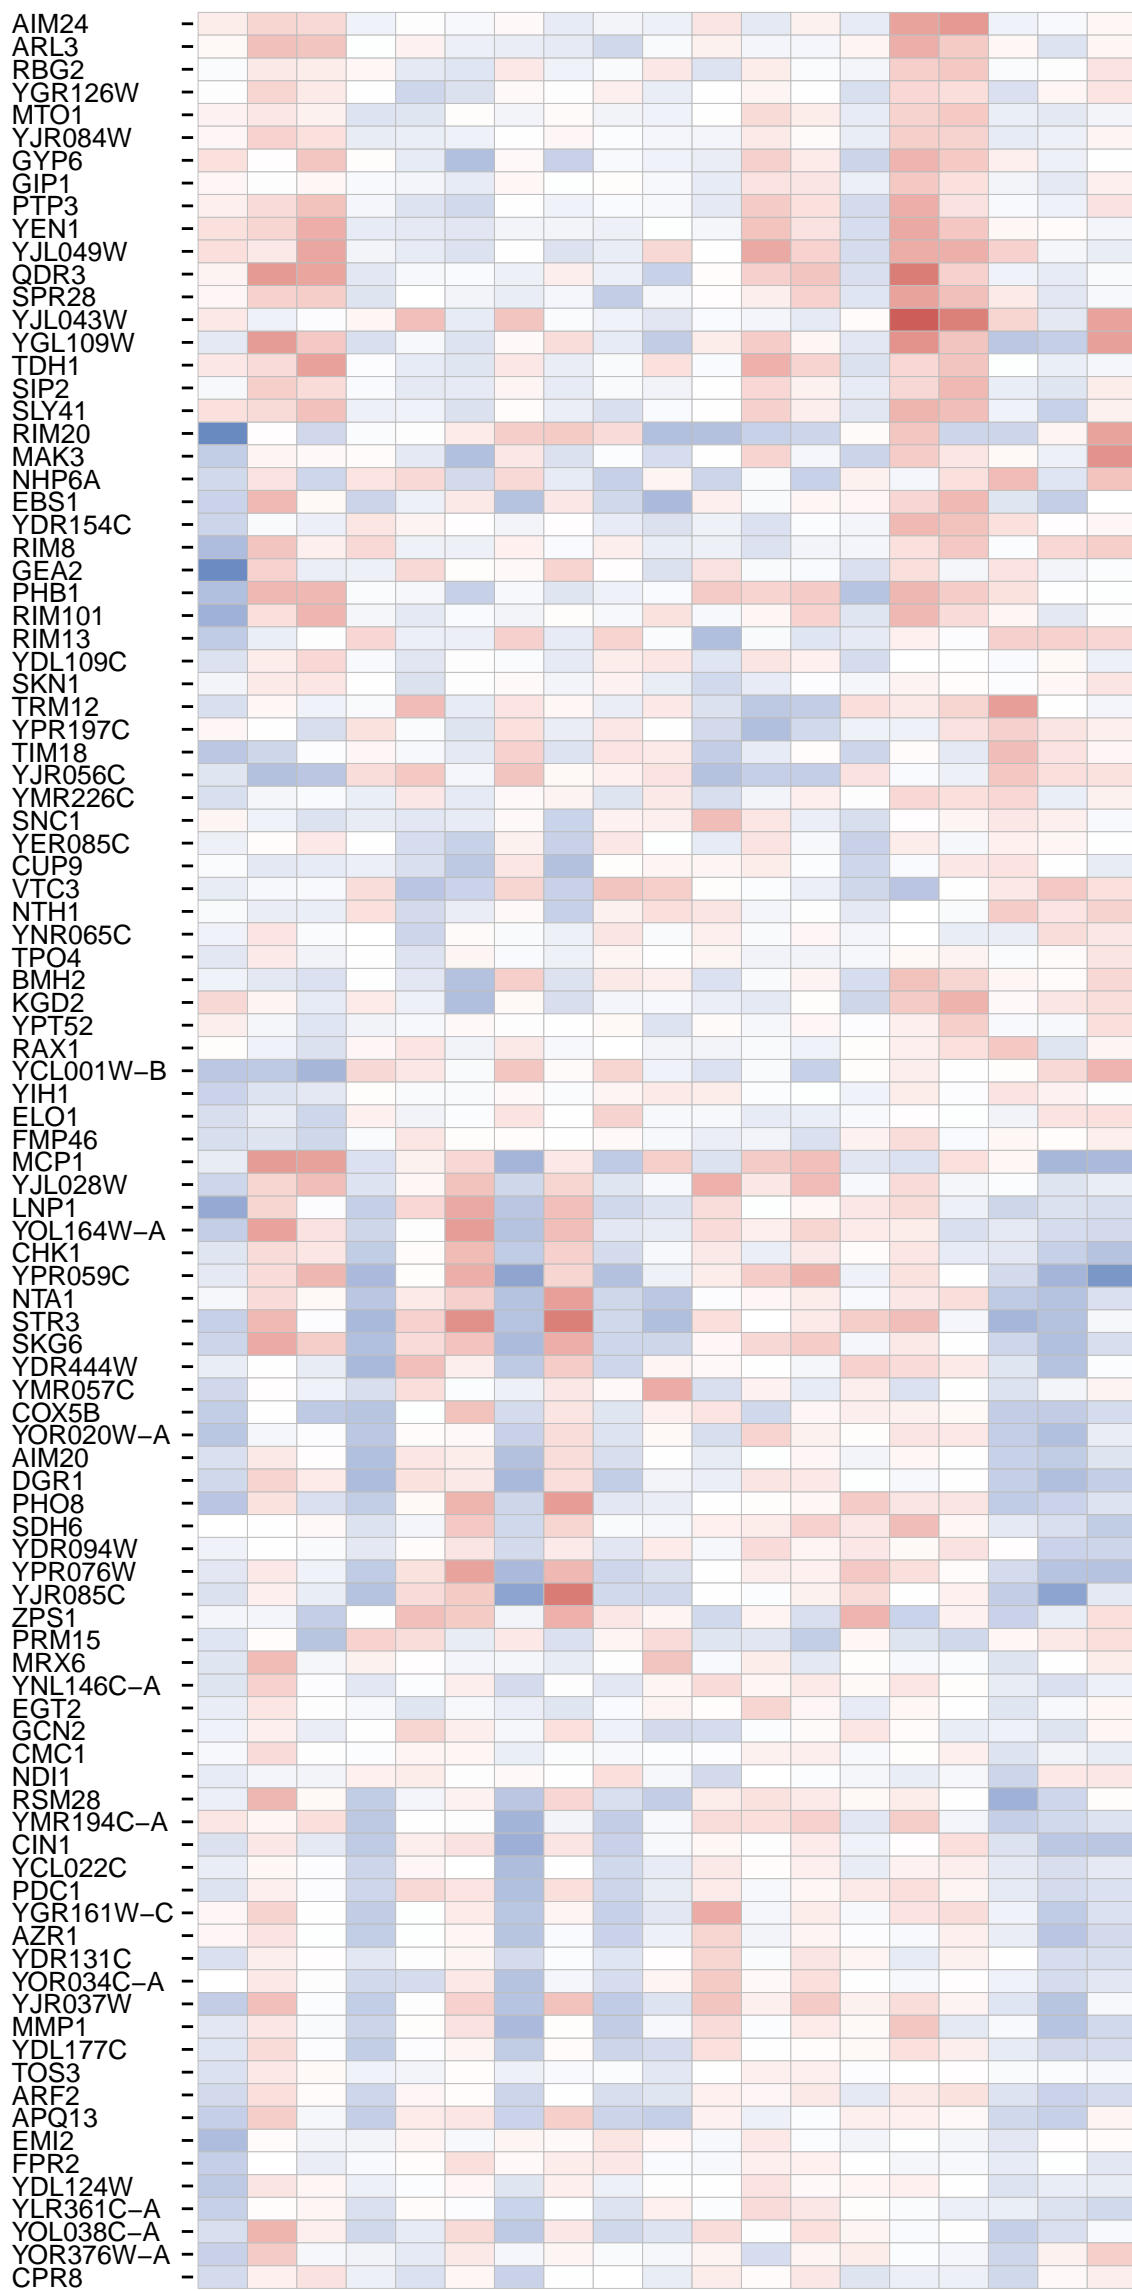

alanine -  
aspartate -  
glutamate -  
phenylalanine -  
glycine -  
histidine -  
isoleucine -  
lysine -  
leucine -  
methionine -  
asparagine -  
proline -  
glutamine -  
arginine -  
serine -  
threonine -  
valine -  
tryptophan -  
tyrosine -

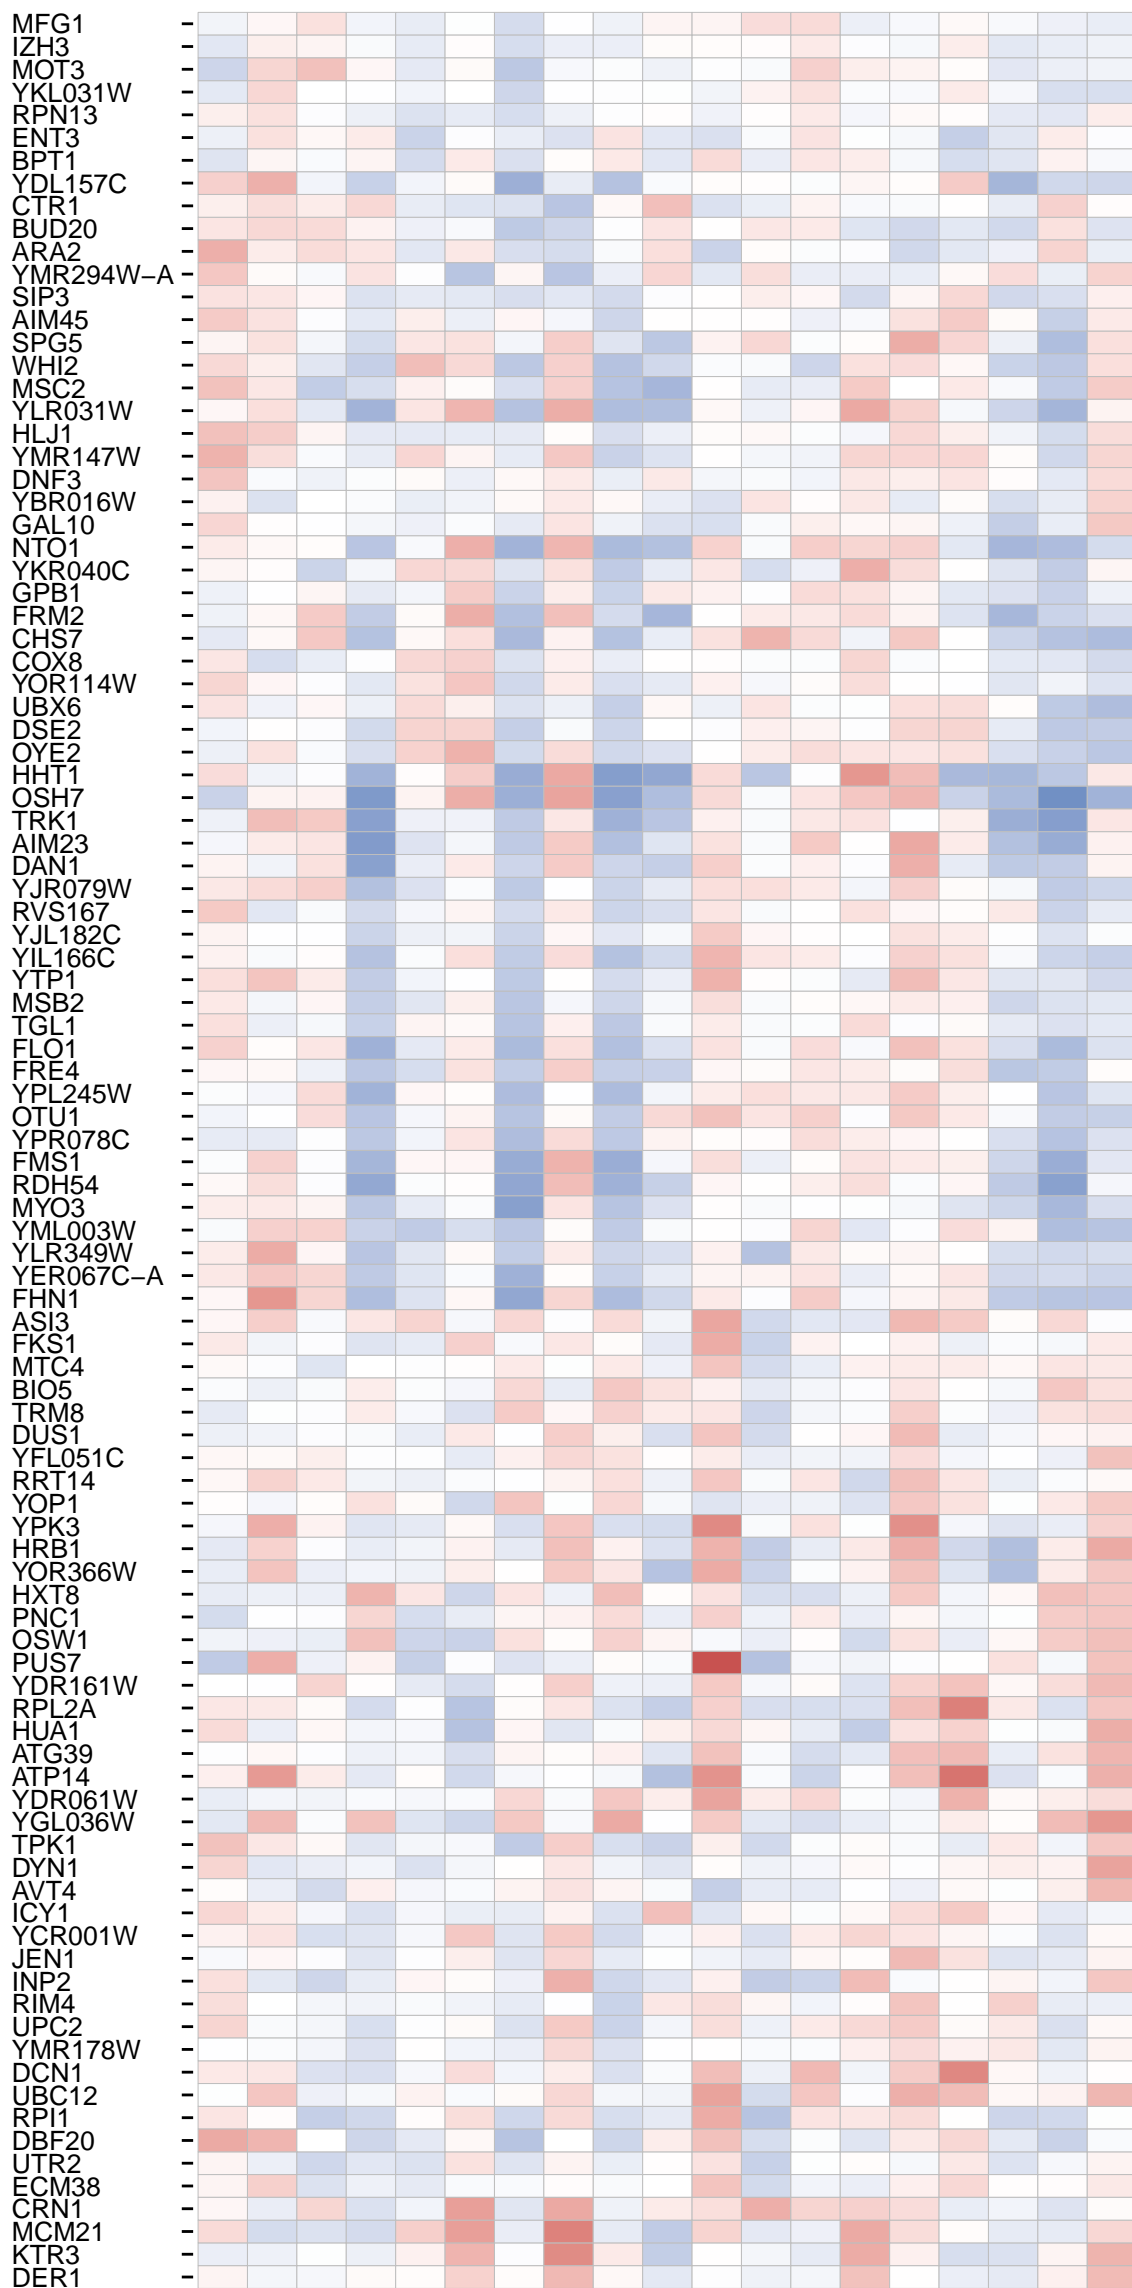

alanine -  
aspartate -  
glutamate -  
phenylalanine -  
glycine -  
histidine -  
isoleucine -  
lysine -  
leucine -  
methionine -  
asparagine -  
proline -  
glutamine -  
arginine -  
serine -  
threonine -  
valine -  
tryptophan -  
tyrosine -

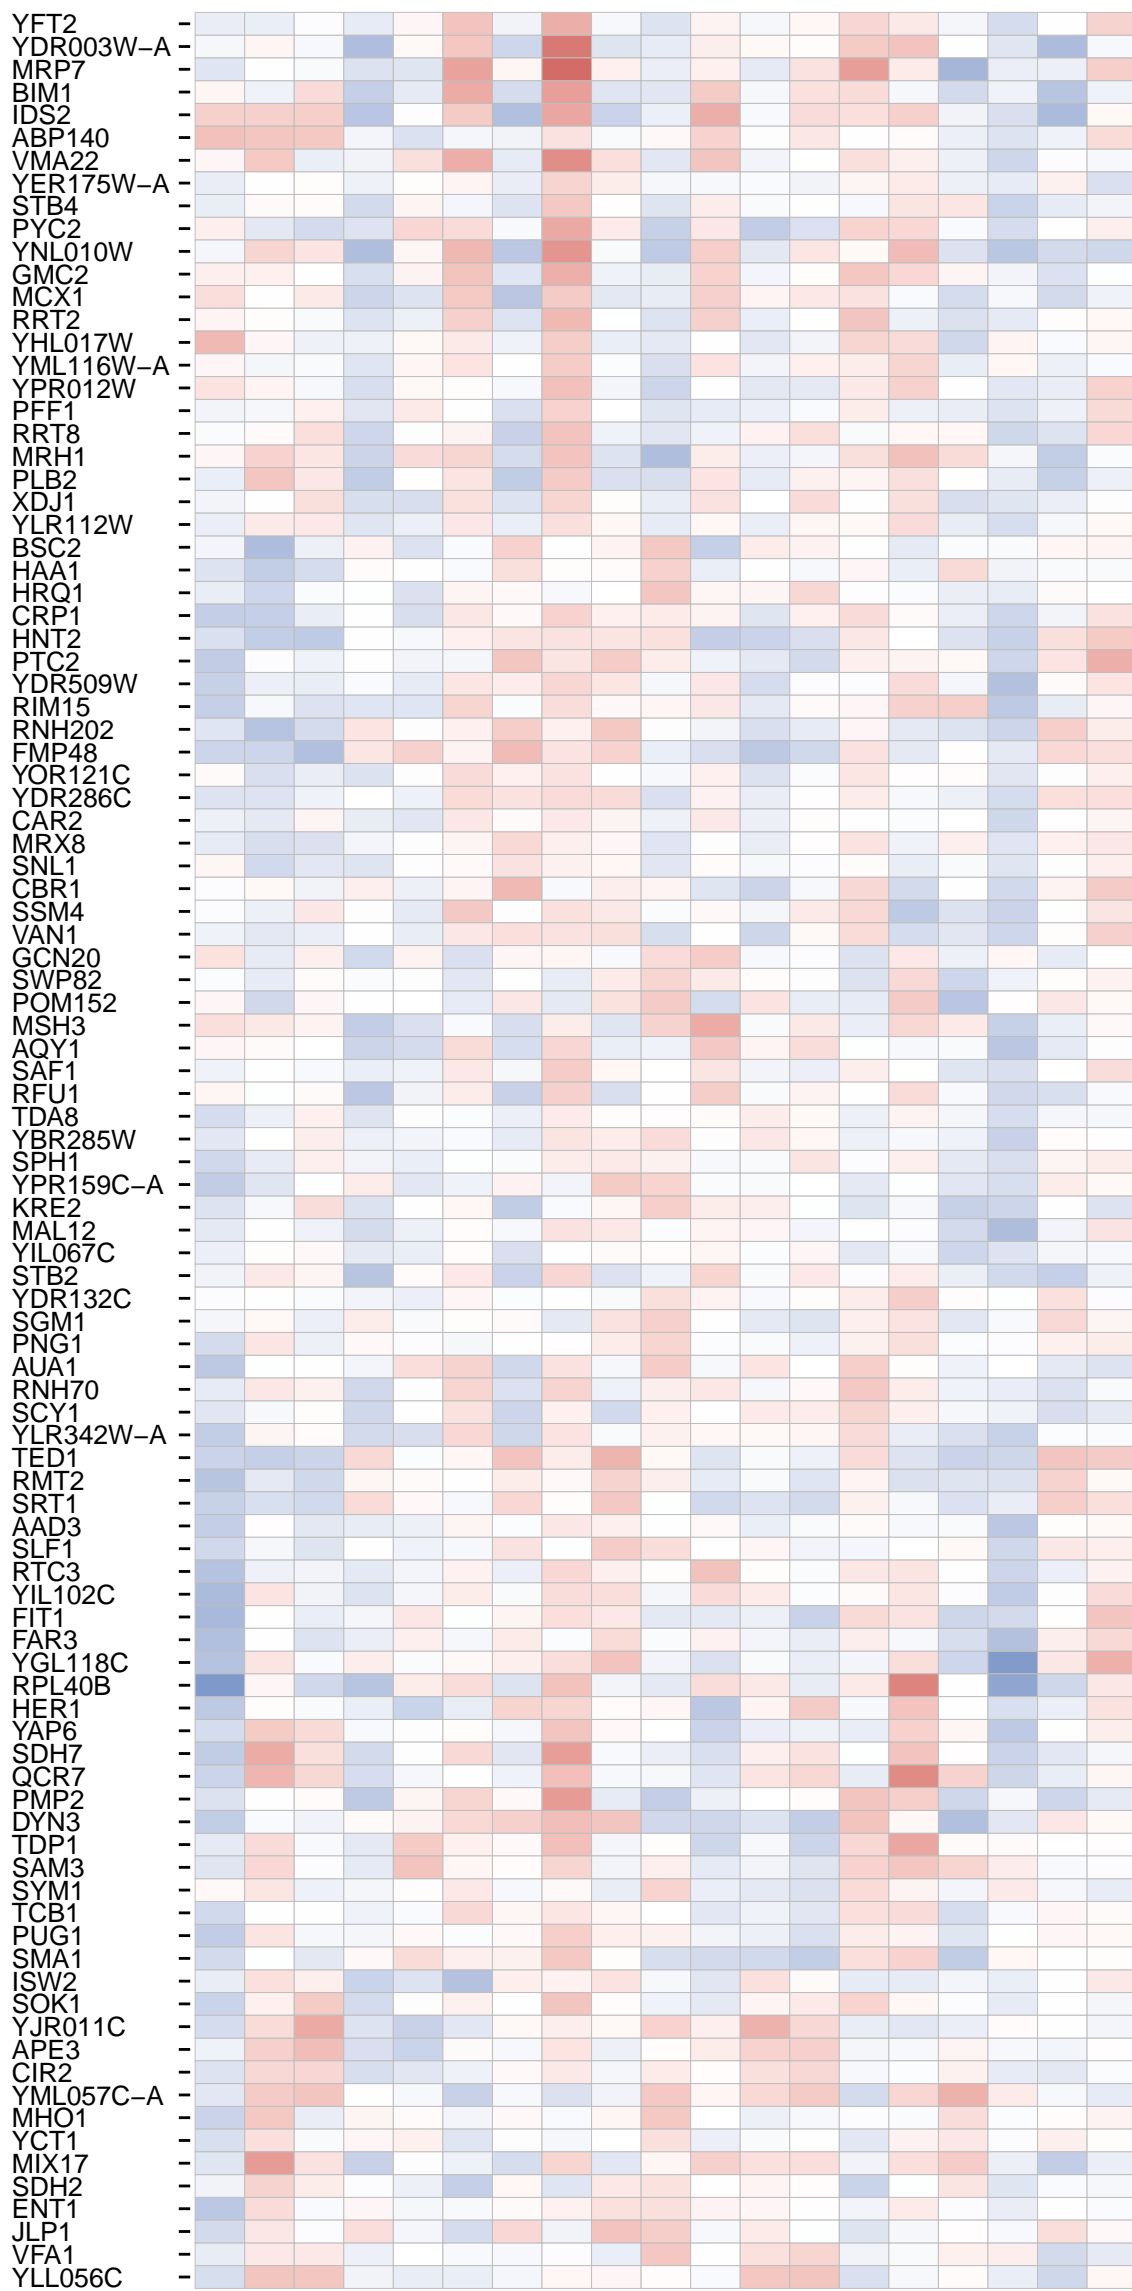

alanine -  
aspartate -  
glutamate -  
phenylalanine -  
glycine -  
histidine -  
isoleucine -  
lysine -  
leucine -  
methionine -  
asparagine -  
proline -  
glutamine -  
arginine -  
serine -  
threonine -  
valine -  
tryptophan -  
tyrosine -

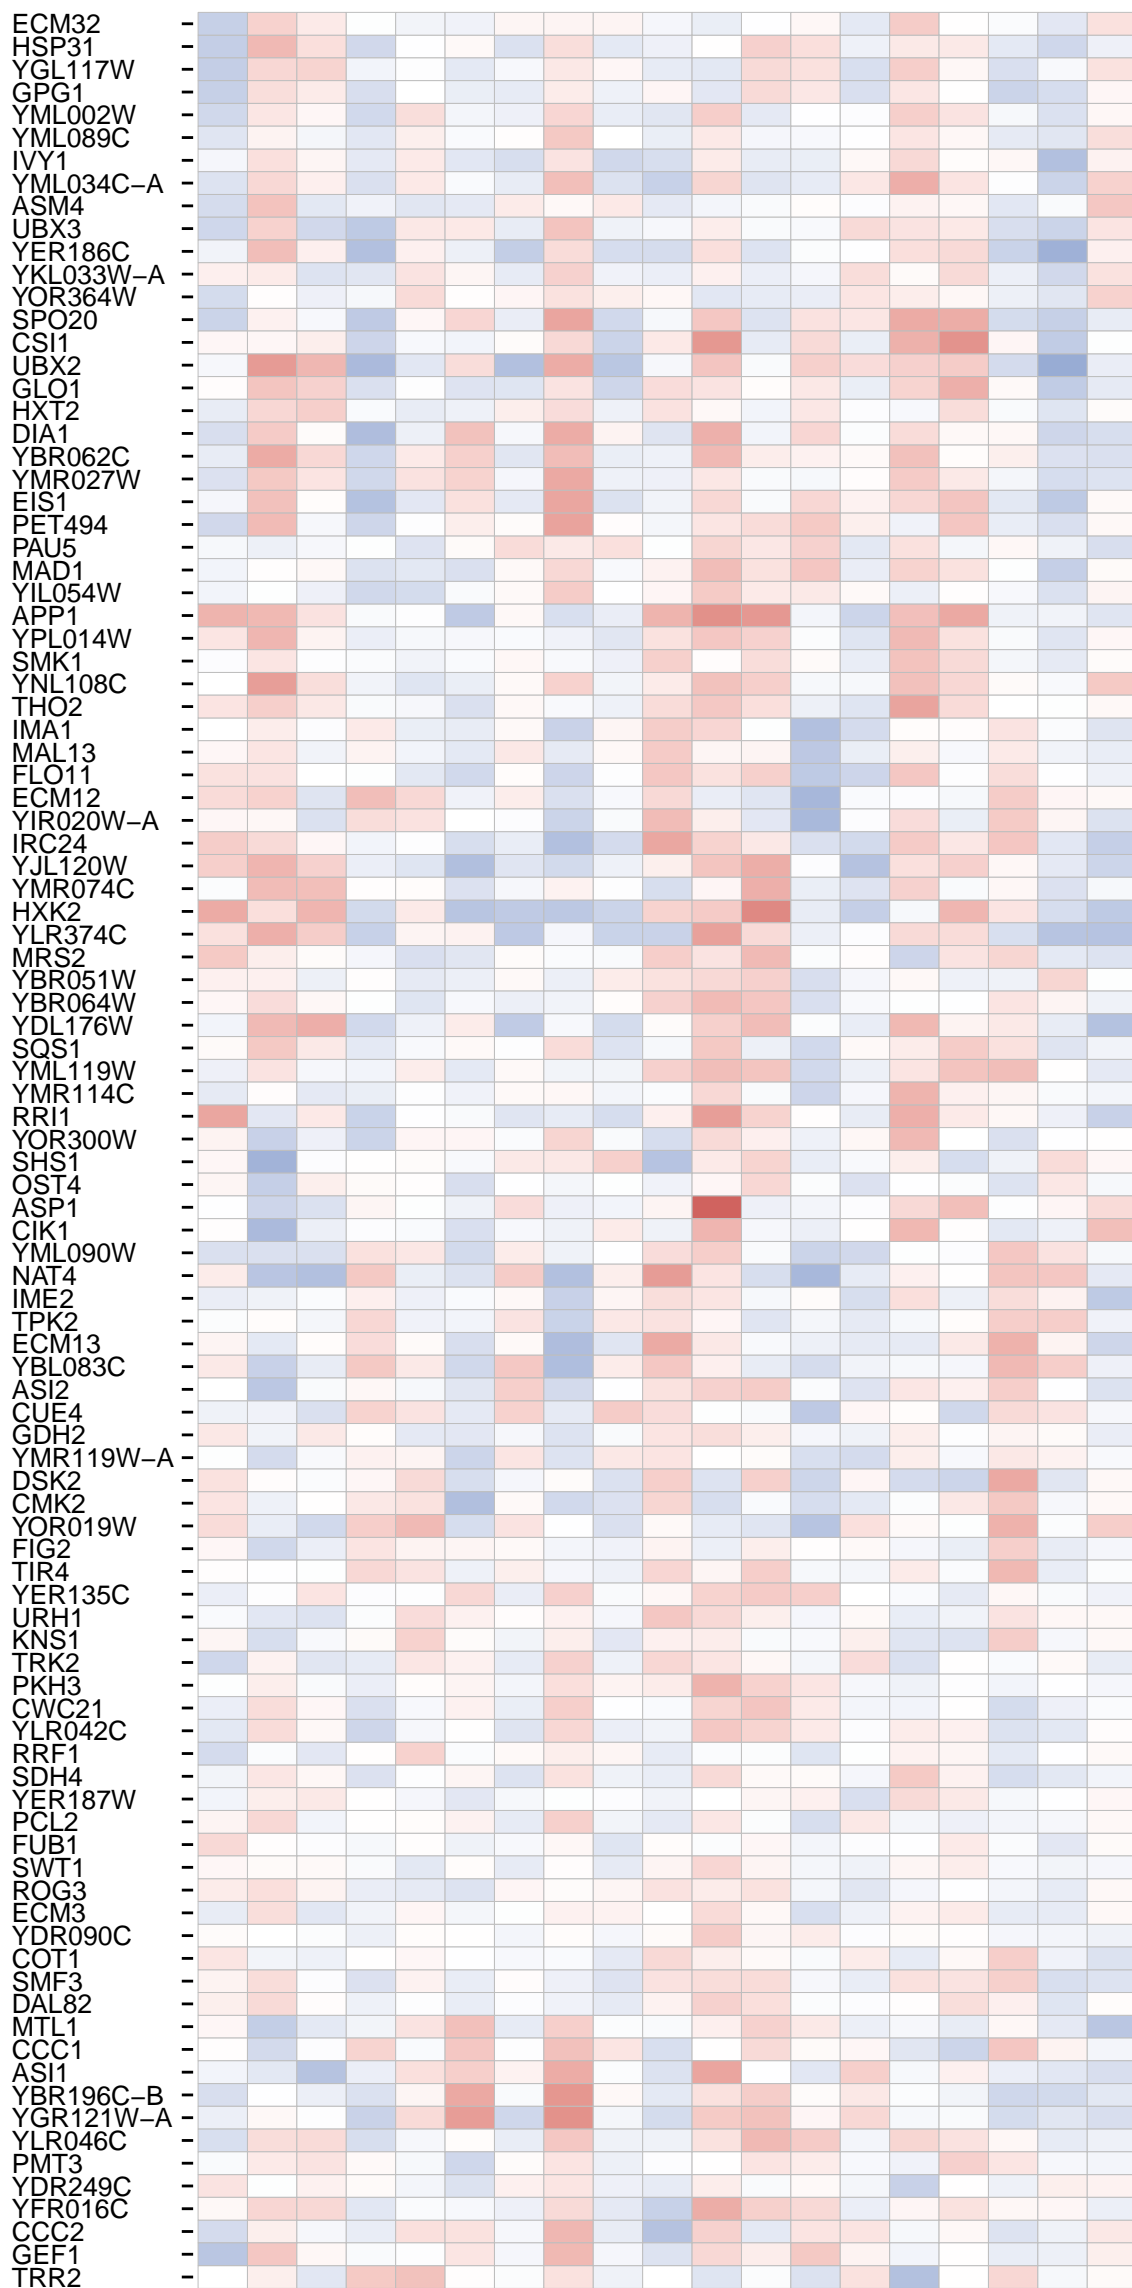

alanine -  
aspartate -  
glutamate -  
phenylalanine -  
glycine -  
histidine -  
isoleucine -  
lysine -  
leucine -  
methionine -  
asparagine -  
proline -  
glutamine -  
arginine -  
serine -  
threonine -  
valine -  
tryptophan -  
tyrosine -

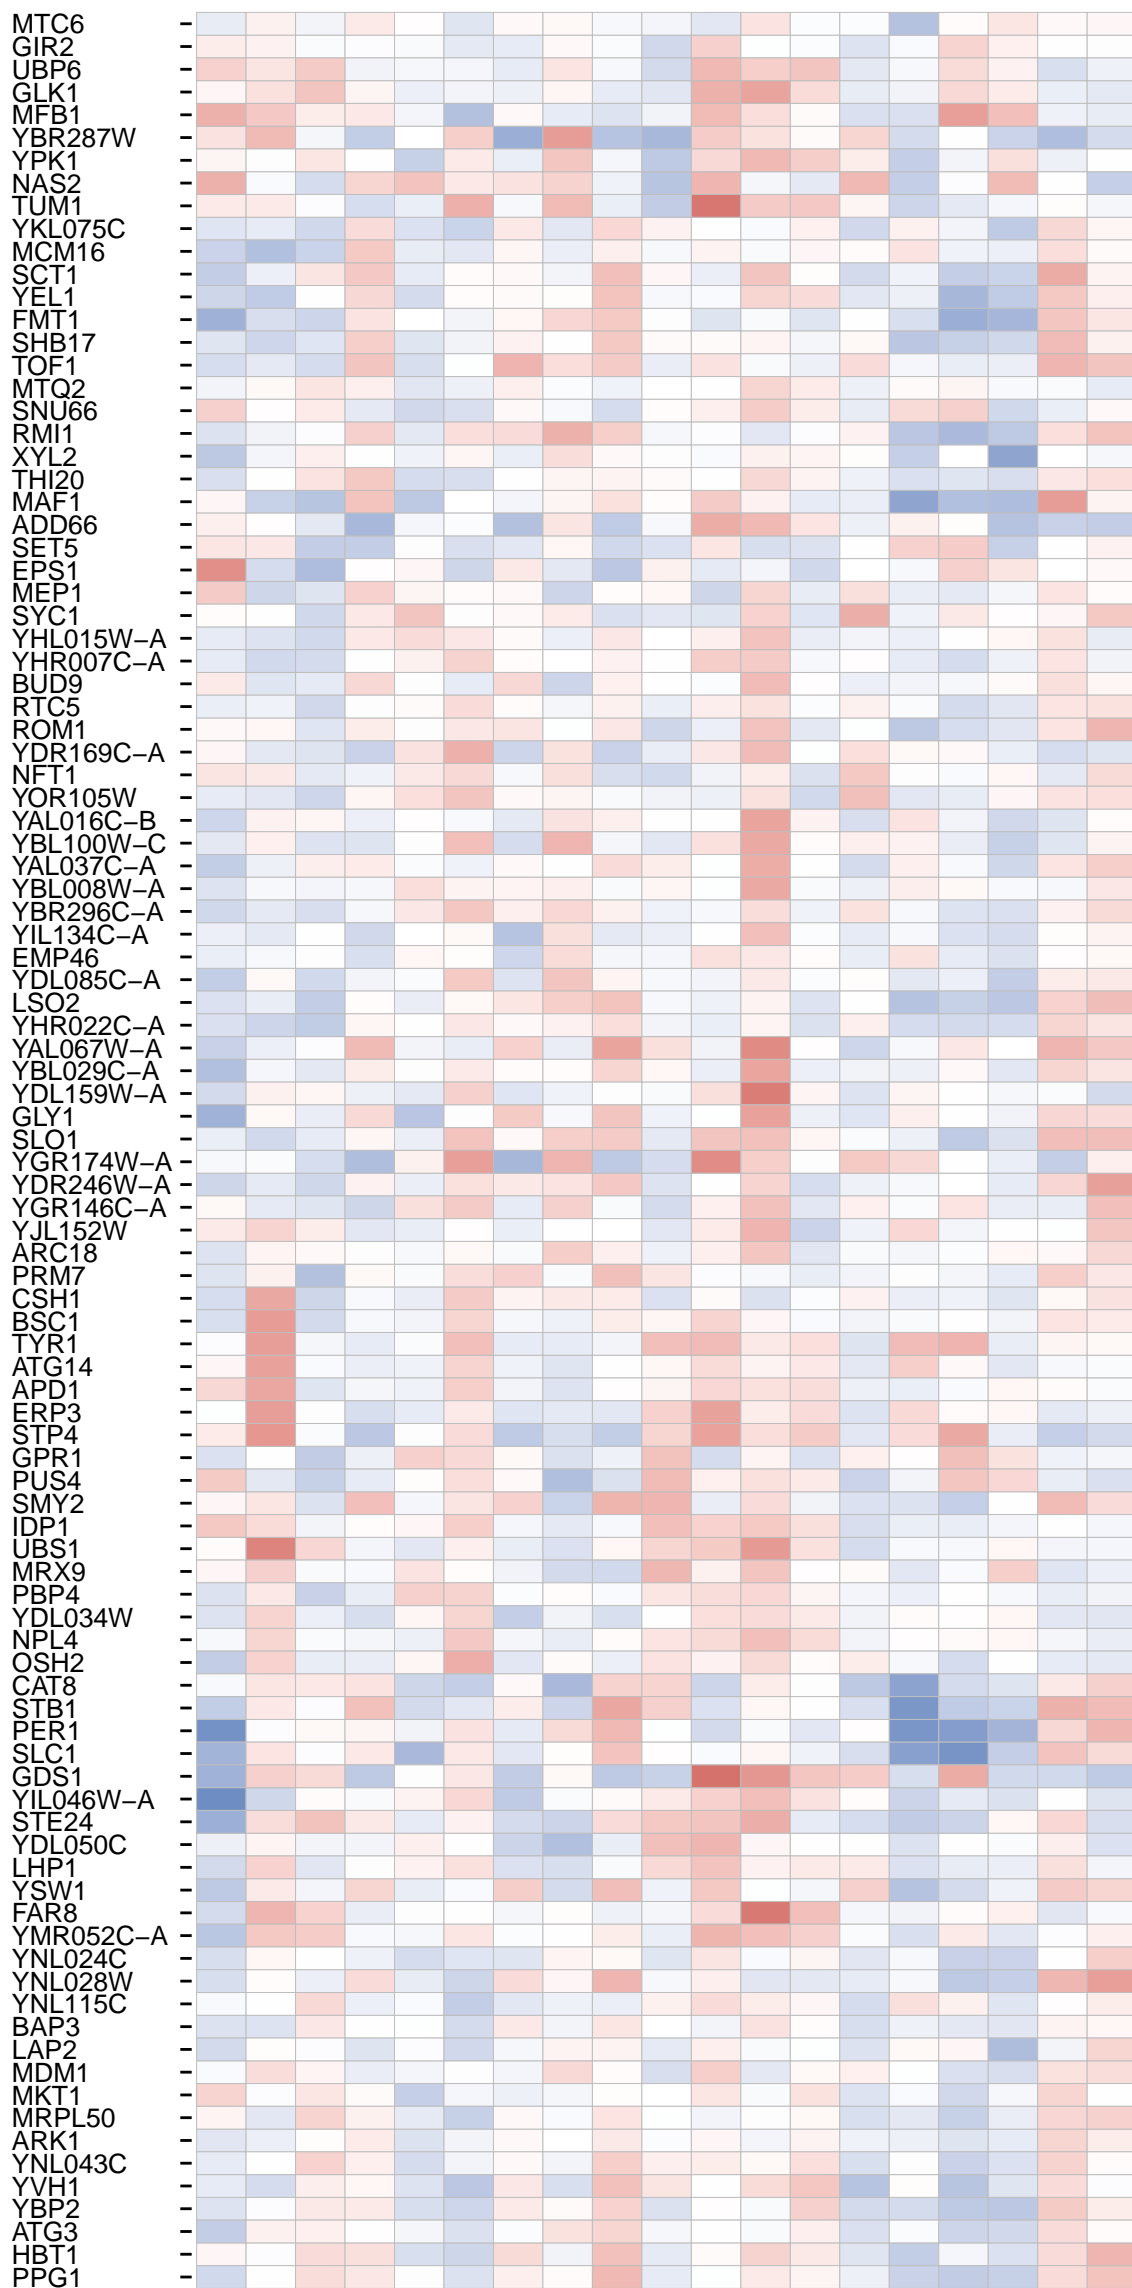

alanine -  
aspartate -  
glutamate -  
phenylalanine -  
glycine -  
histidine -  
isoleucine -  
lysine -  
leucine -  
methionine -  
asparagine -  
proline -  
glutamine -  
arginine -  
serine -  
threonine -  
valine -  
tryptophan -  
tyrosine -

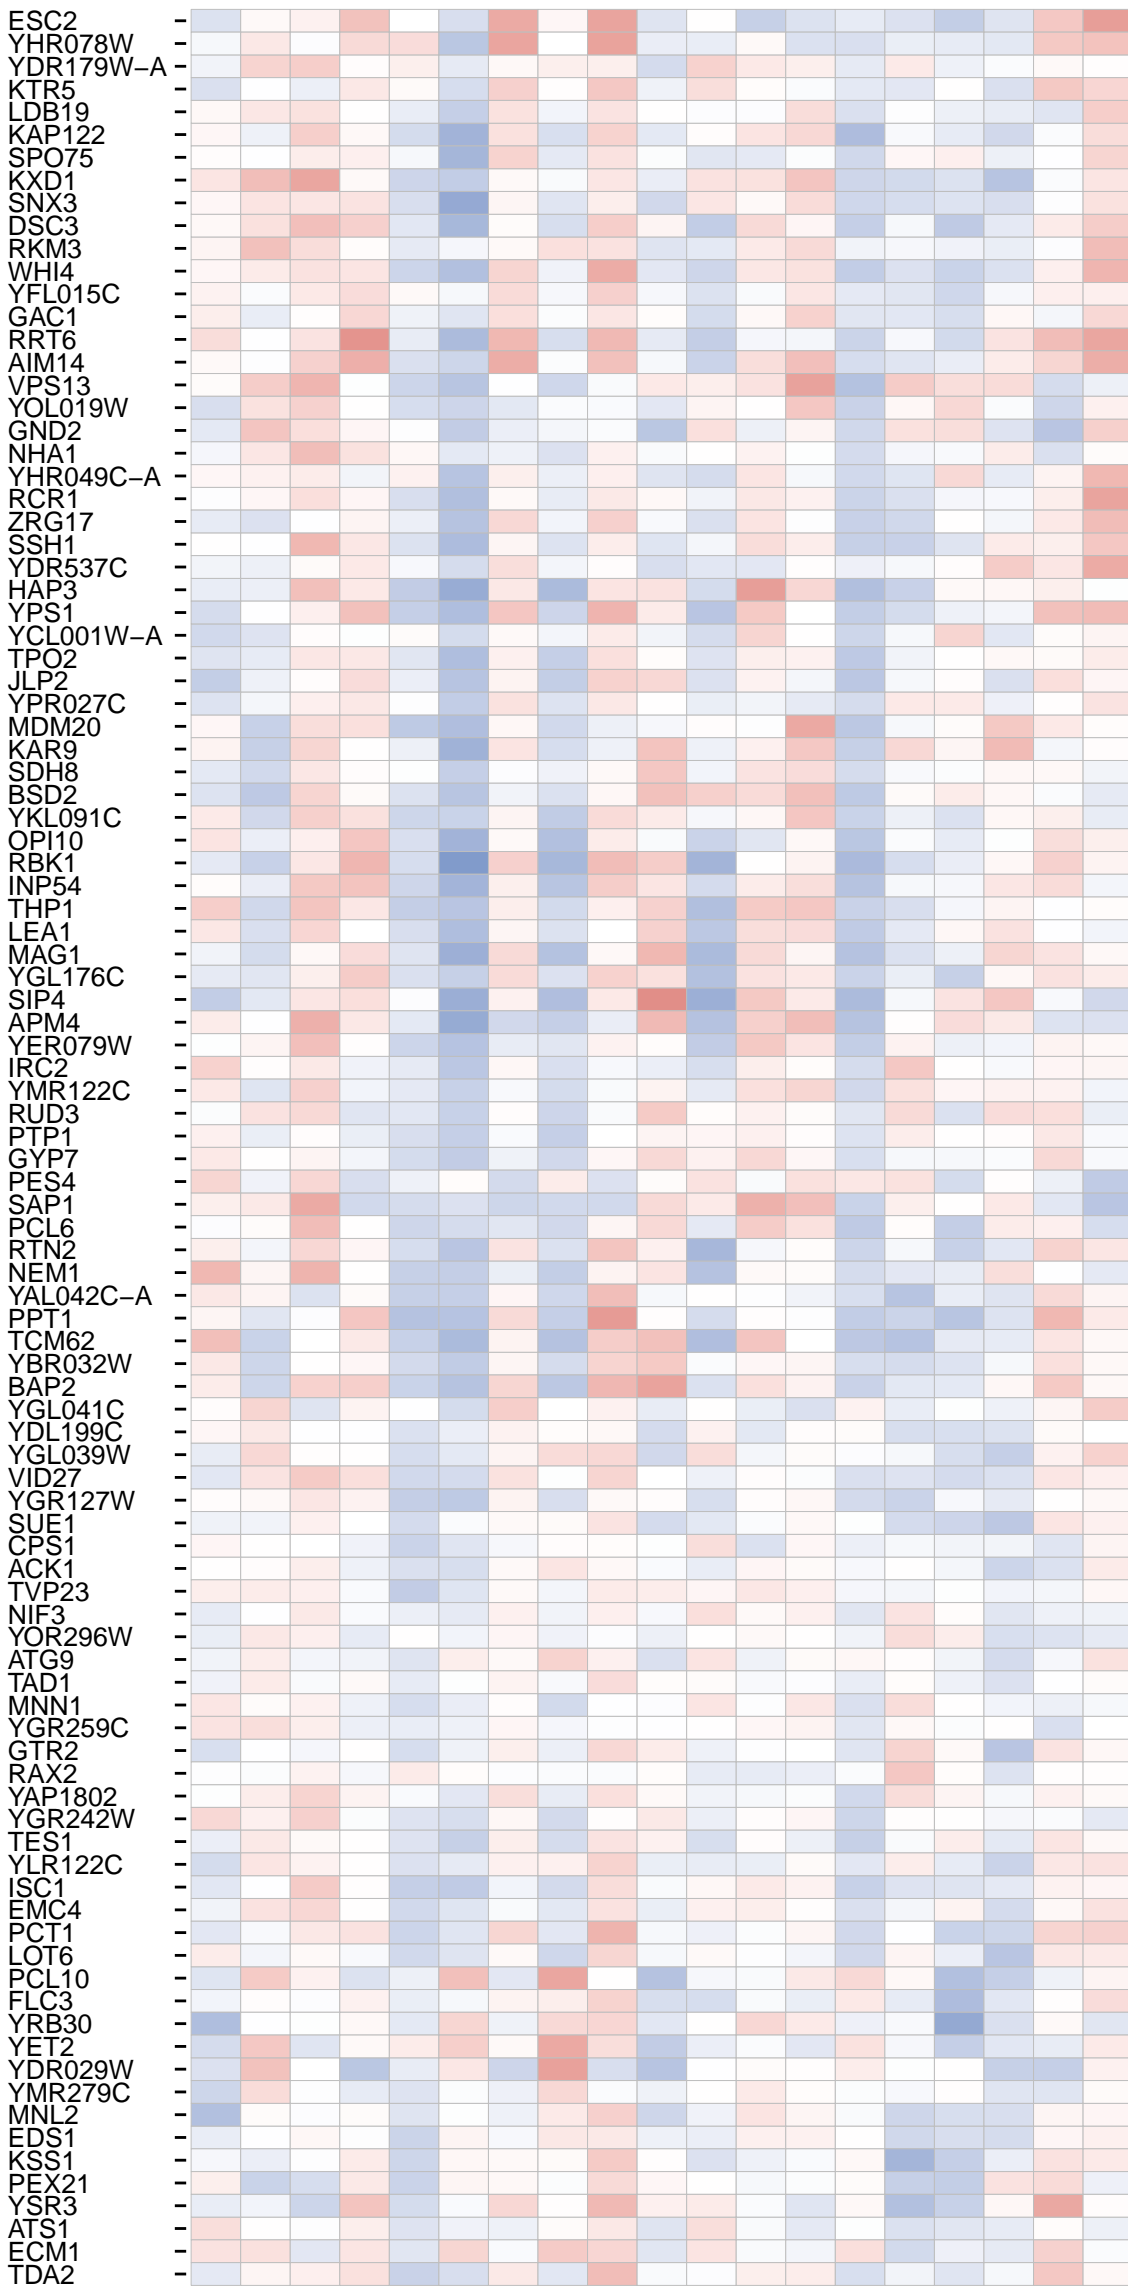

alanine -  
aspartate -  
glutamate -  
phenylalanine -  
glycine -  
histidine -  
isoleucine -  
lysine -  
leucine -  
methionine -  
asparagine -  
proline -  
glutamine -  
arginine -  
serine -  
threonine -  
valine -  
tryptophan -  
tyrosine -

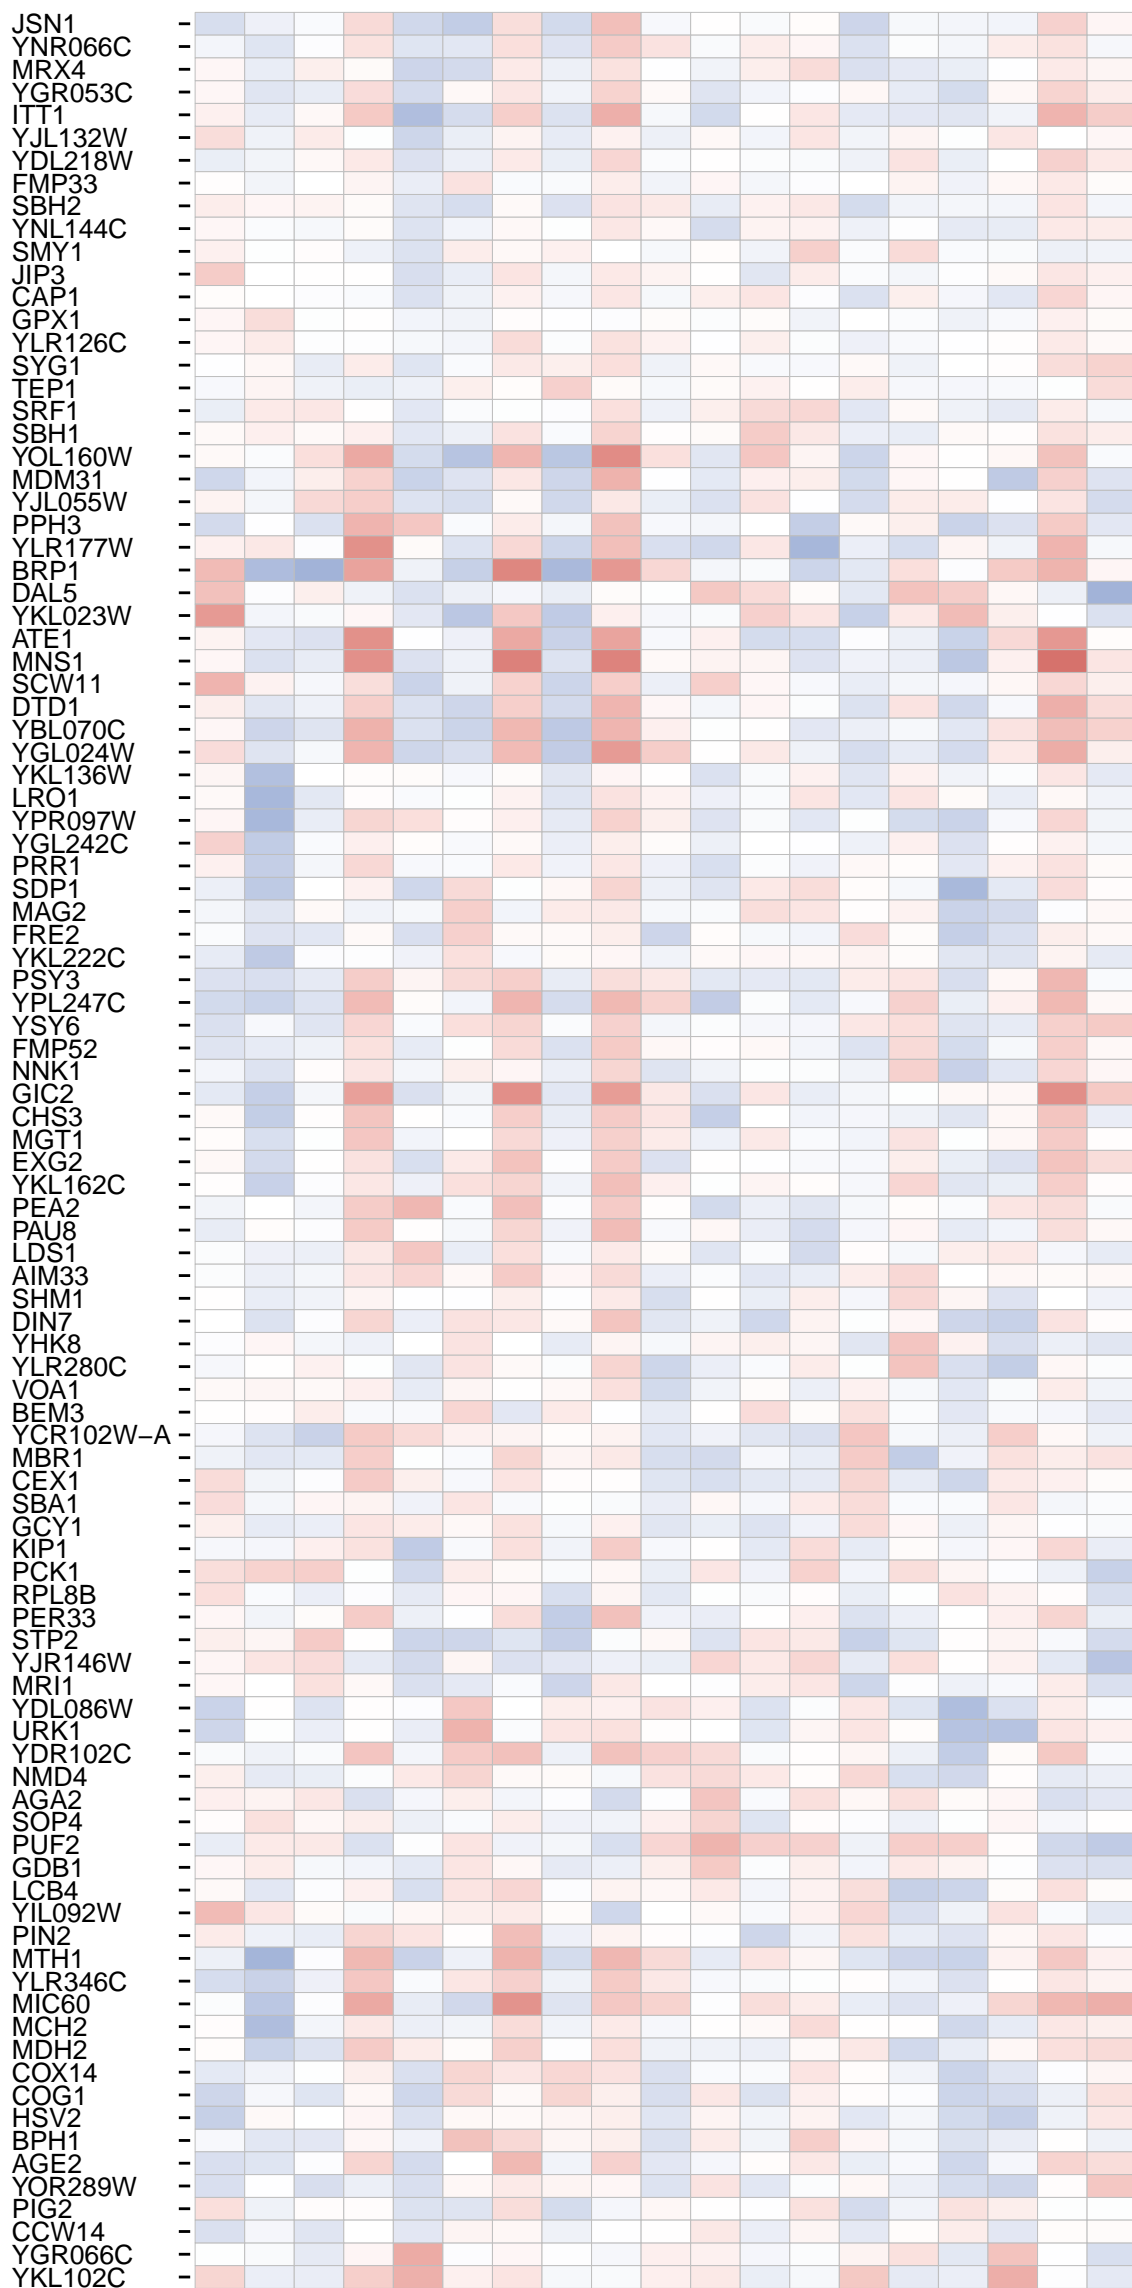

alanine -  
aspartate -  
glutamate -  
phenylalanine -  
glycine -  
histidine -  
isoleucine -  
lysine -  
leucine -  
methionine -  
asparagine -  
proline -  
glutamine -  
arginine -  
serine -  
threonine -  
valine -  
tryptophan -  
tyrosine -

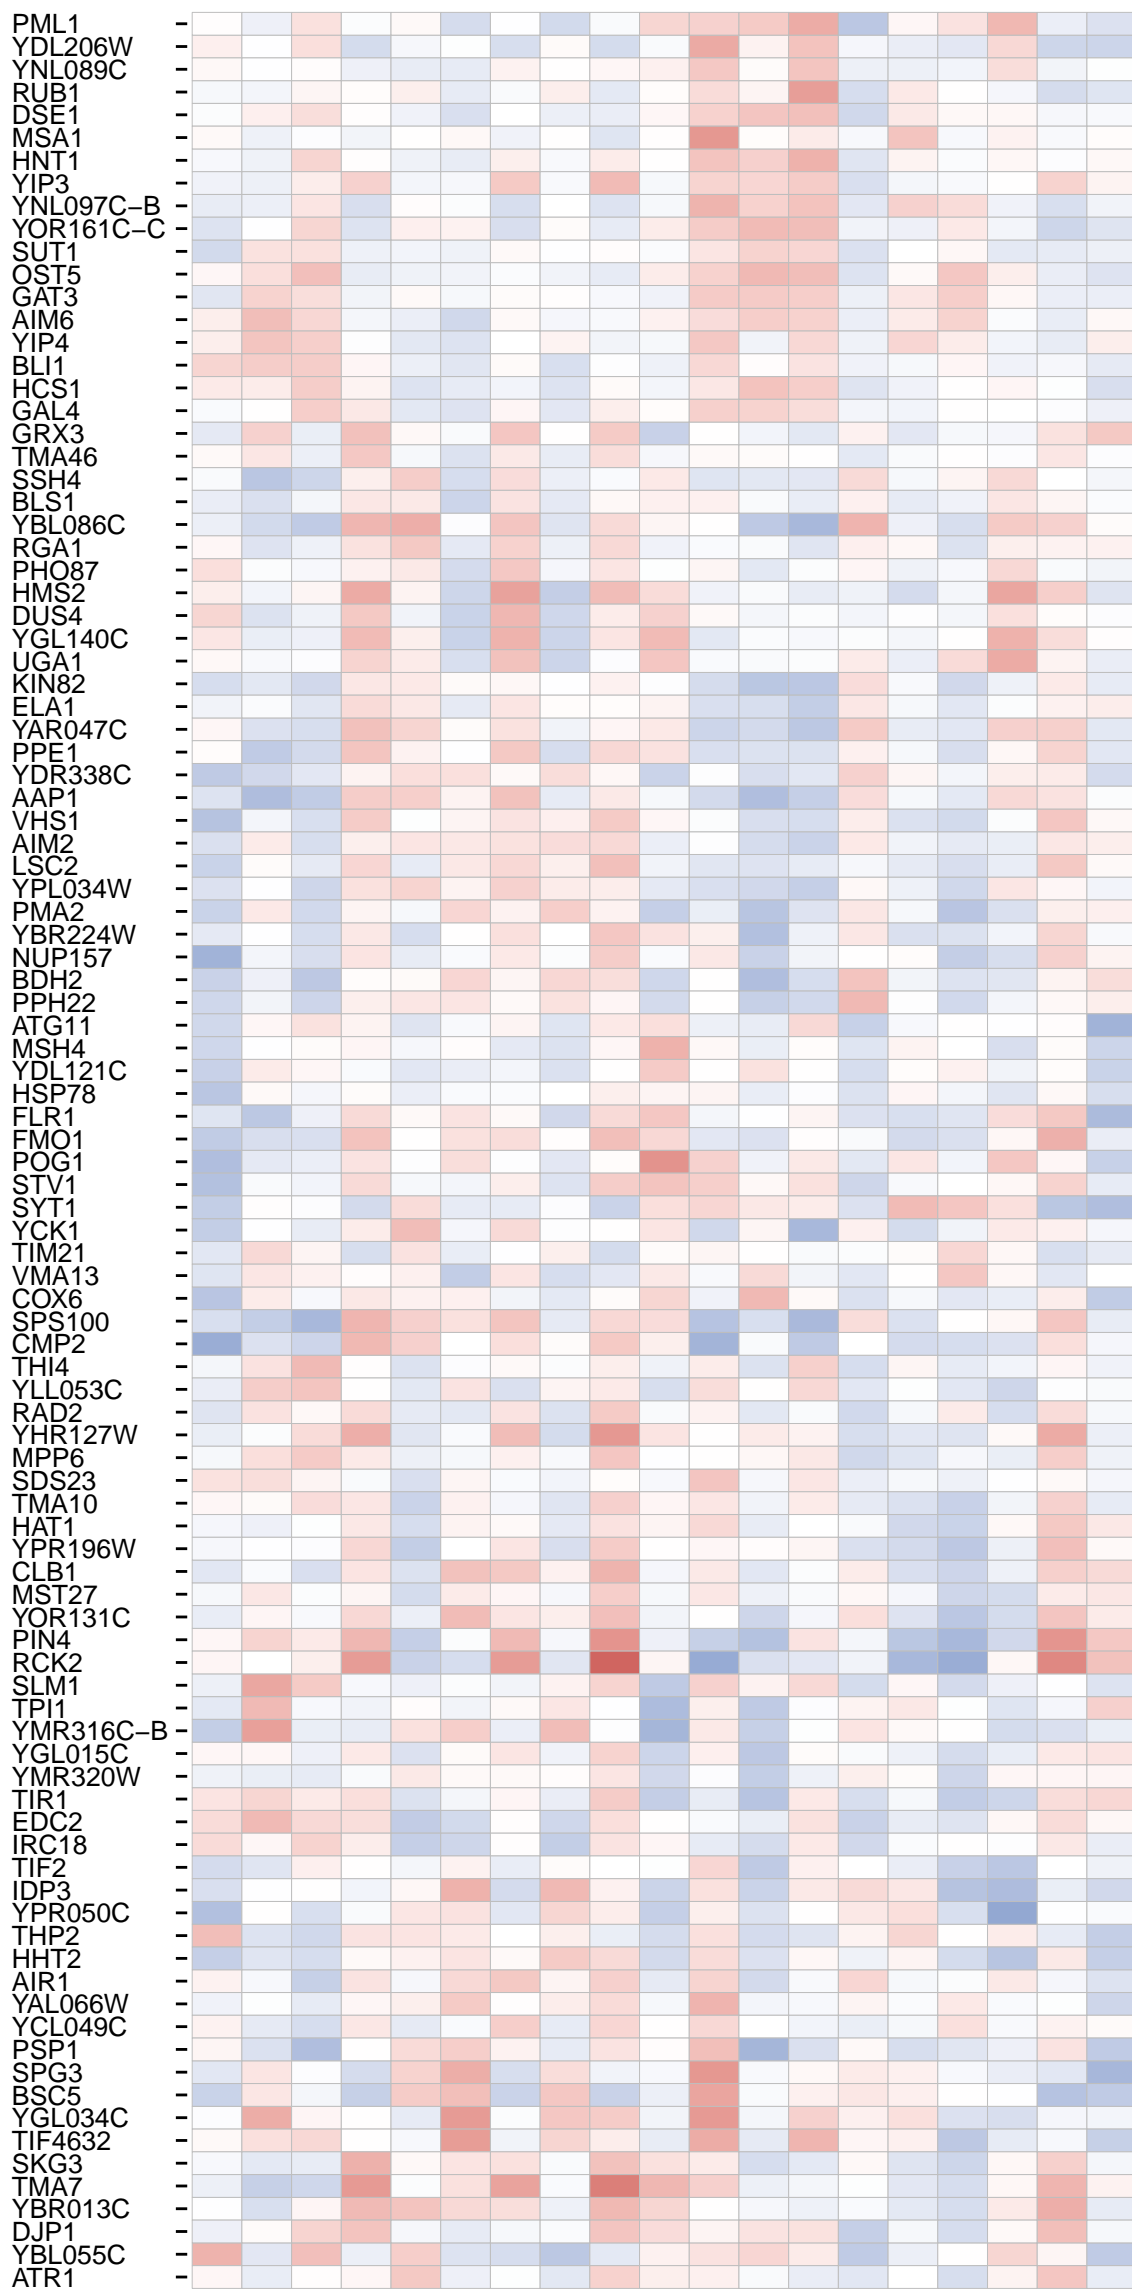

alanine -  
aspartate -  
glutamate -  
phenylalanine -  
glycine -  
histidine -  
isoleucine -  
lysine -  
leucine -  
methionine -  
asparagine -  
proline -  
glutamine -  
arginine -  
serine -  
threonine -  
valine -  
tryptophan -  
tyrosine -



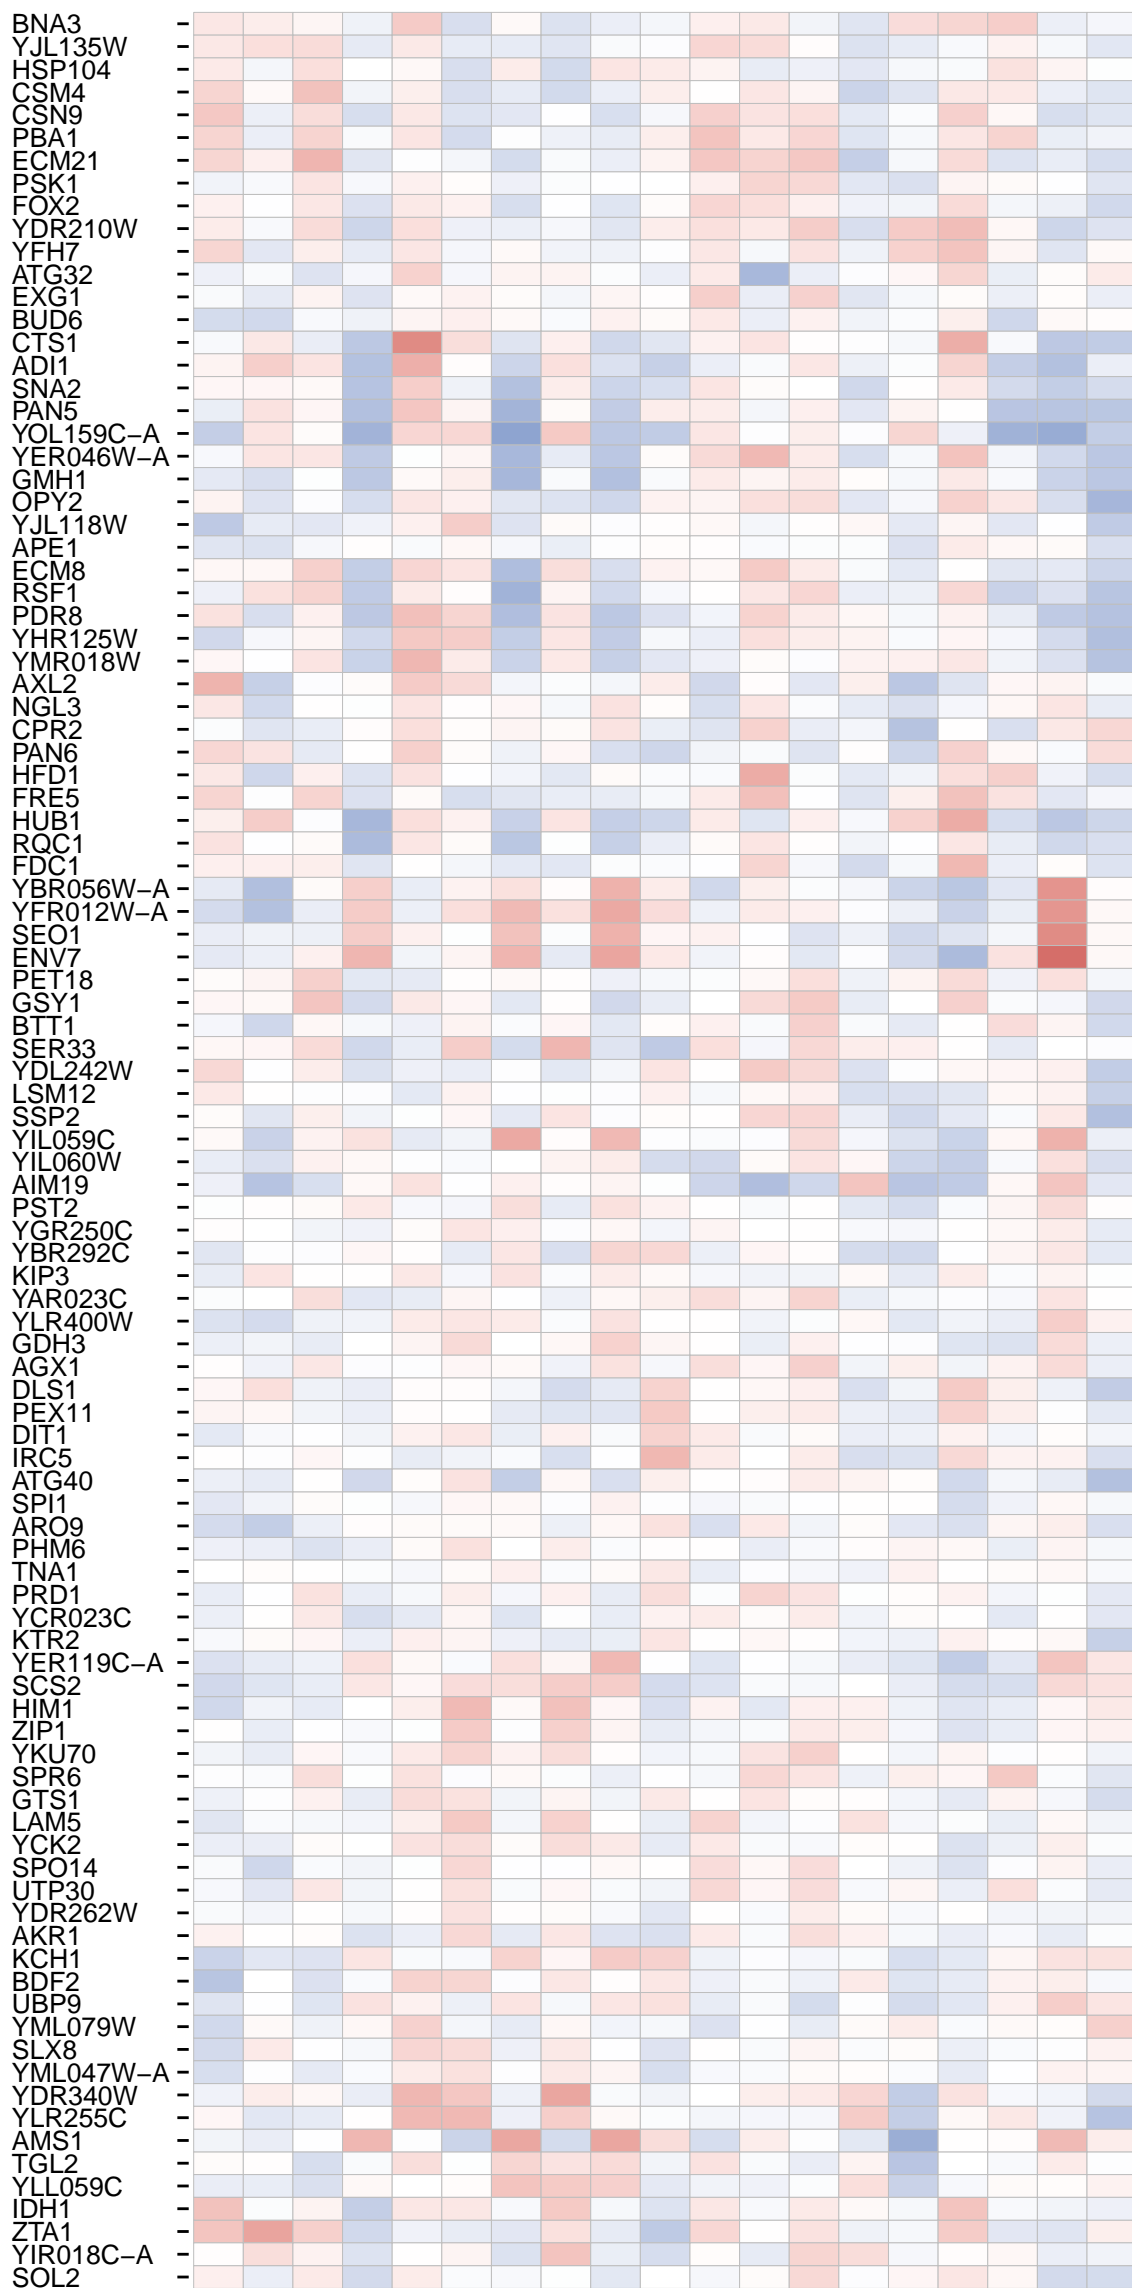

alanine -  
aspartate -  
glutamate -  
phenylalanine -  
glycine -  
histidine -  
isoleucine -  
lysine -  
leucine -  
methionine -  
asparagine -  
proline -  
glutamine -  
arginine -  
serine -  
threonine -  
valine -  
tryptophan -  
tyrosine -

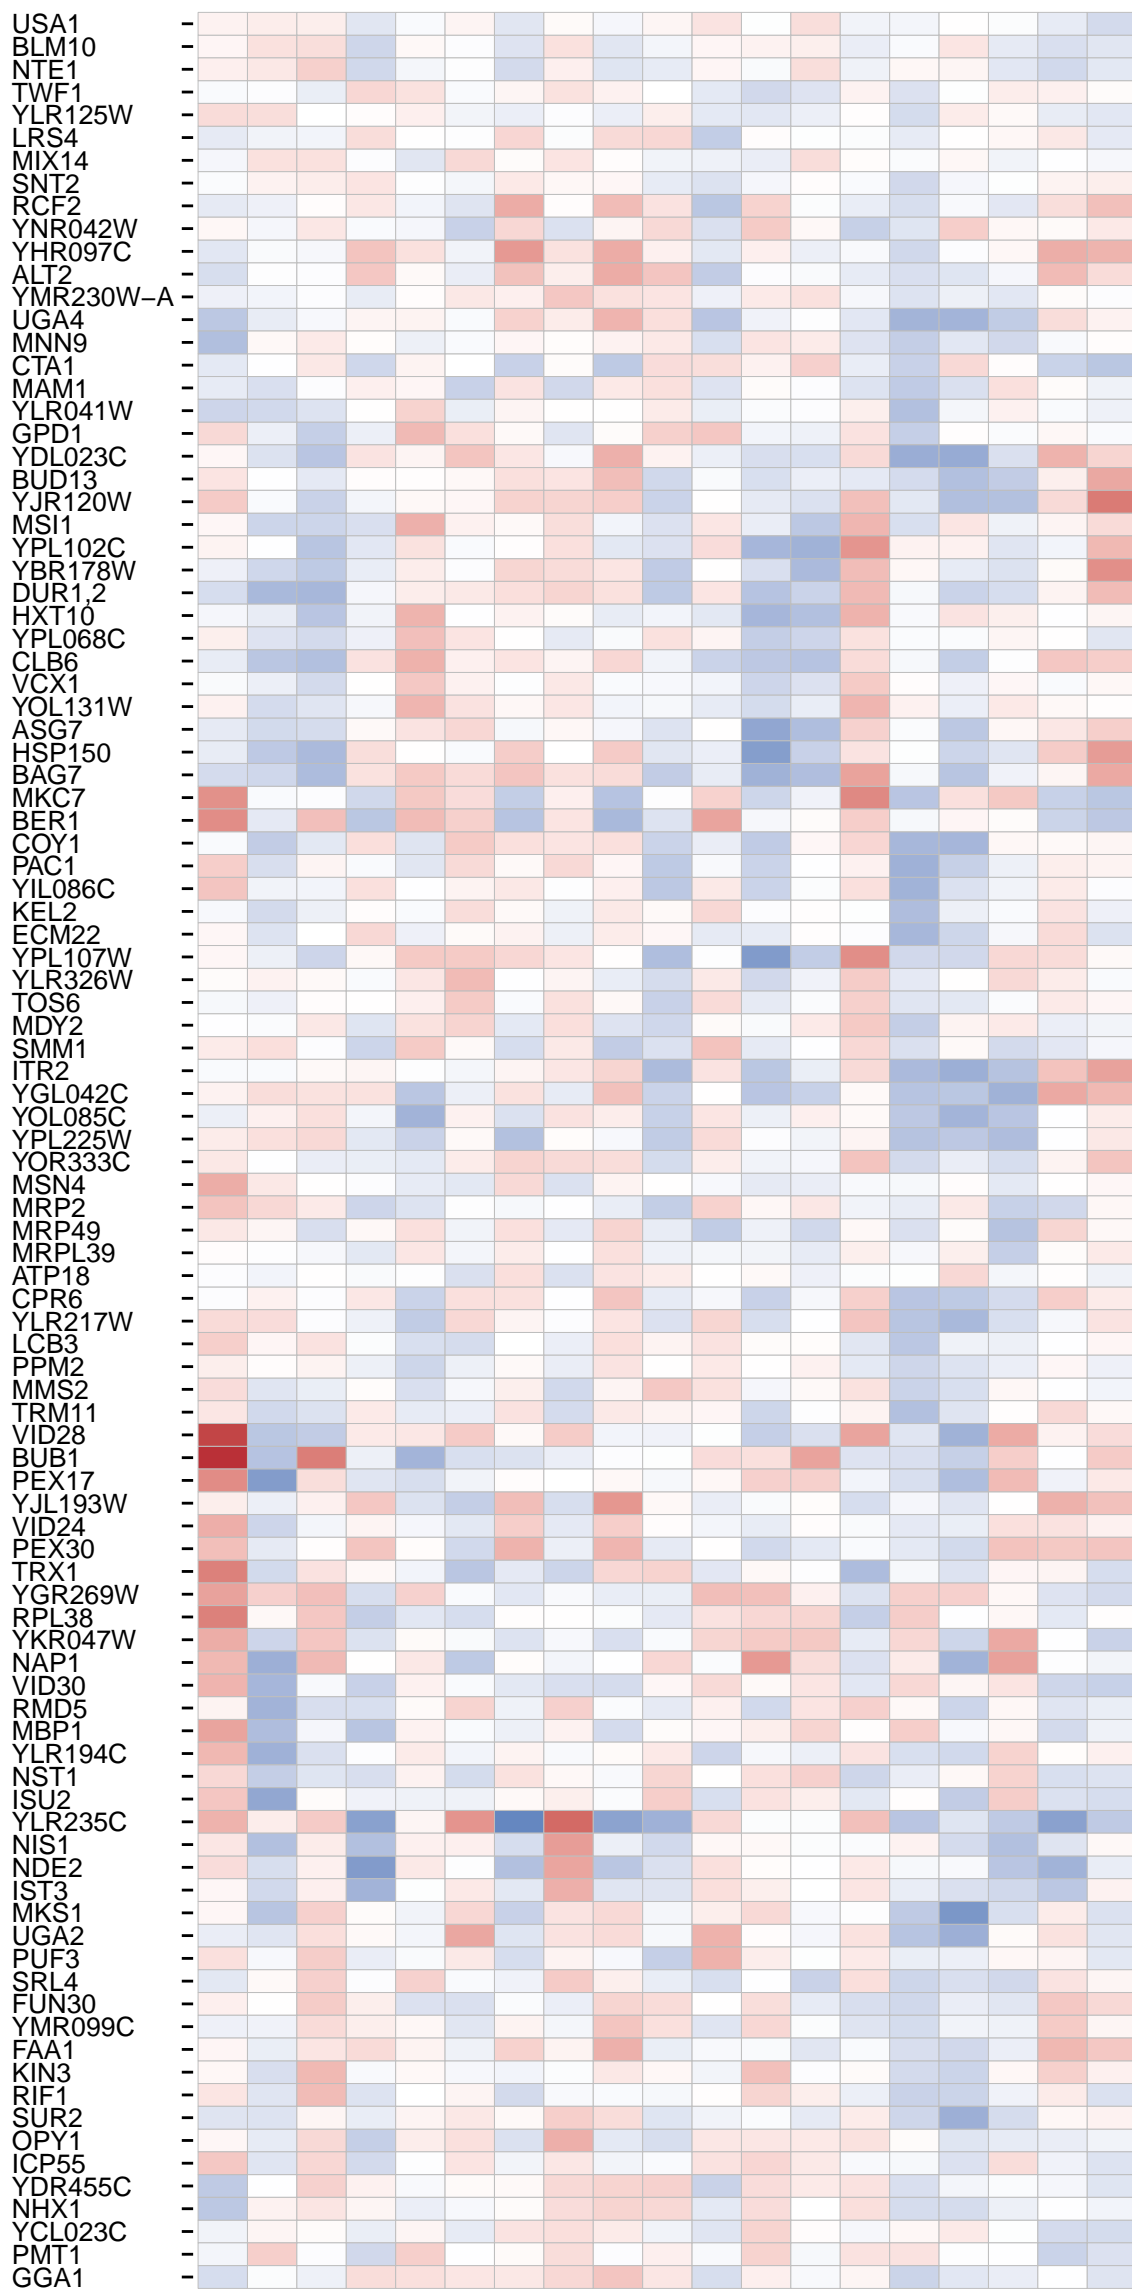

alanine -  
aspartate -  
glutamate -  
phenylalanine -  
glycine -  
histidine -  
isoleucine -  
lysine -  
leucine -  
methionine -  
asparagine -  
proline -  
glutamine -  
arginine -  
serine -  
threonine -  
valine -  
tryptophan -  
tyrosine -

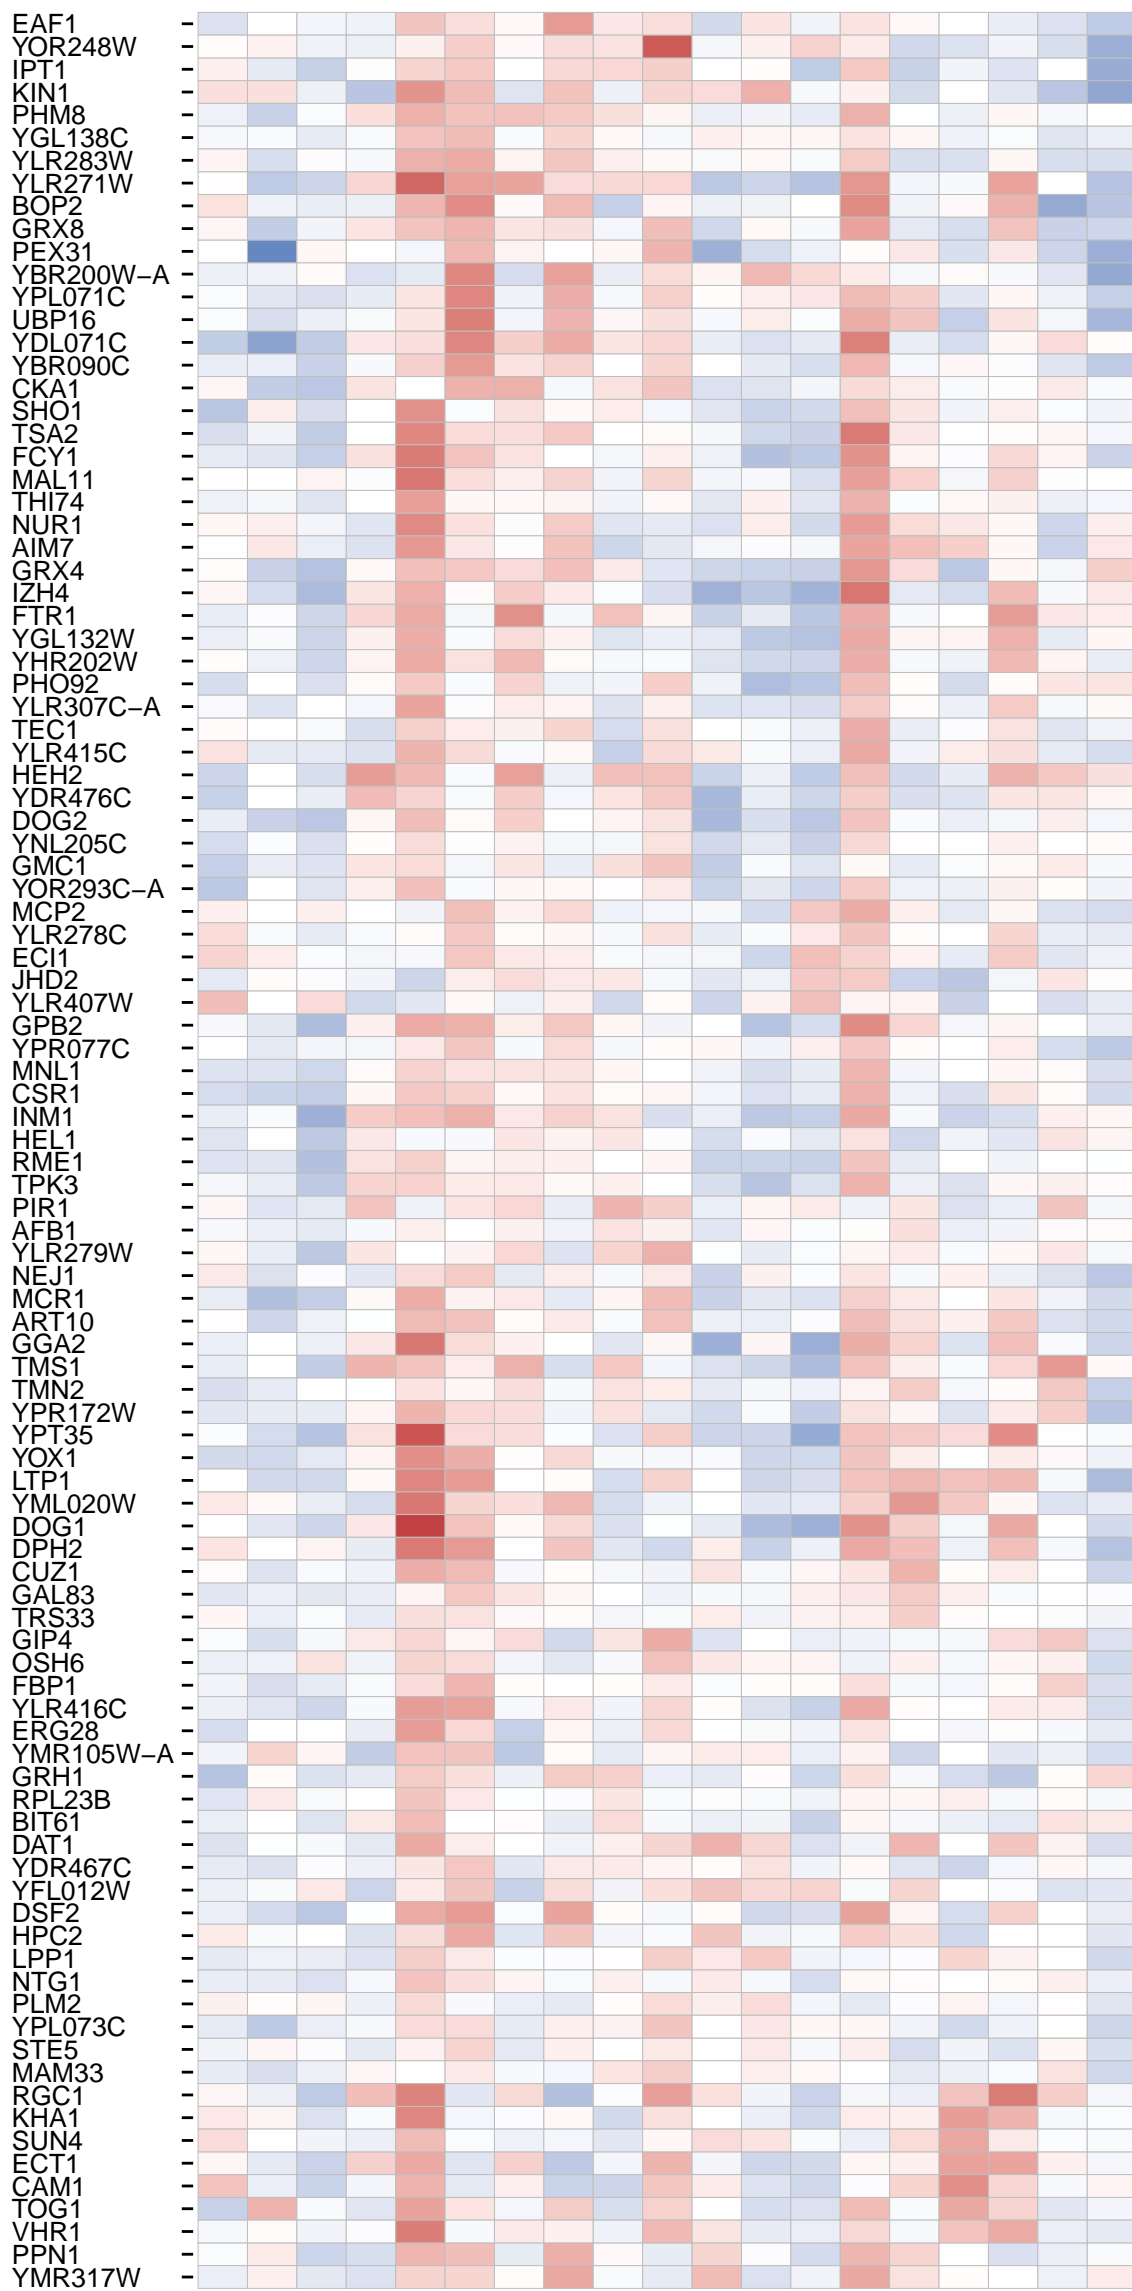

alanine -  
aspartate -  
glutamate -  
phenylalanine -  
glycine -  
histidine -  
isoleucine -  
lysine -  
leucine -  
methionine -  
asparagine -  
proline -  
glutamine -  
arginine -  
serine -  
threonine -  
valine -  
tryptophan -  
tyrosine -

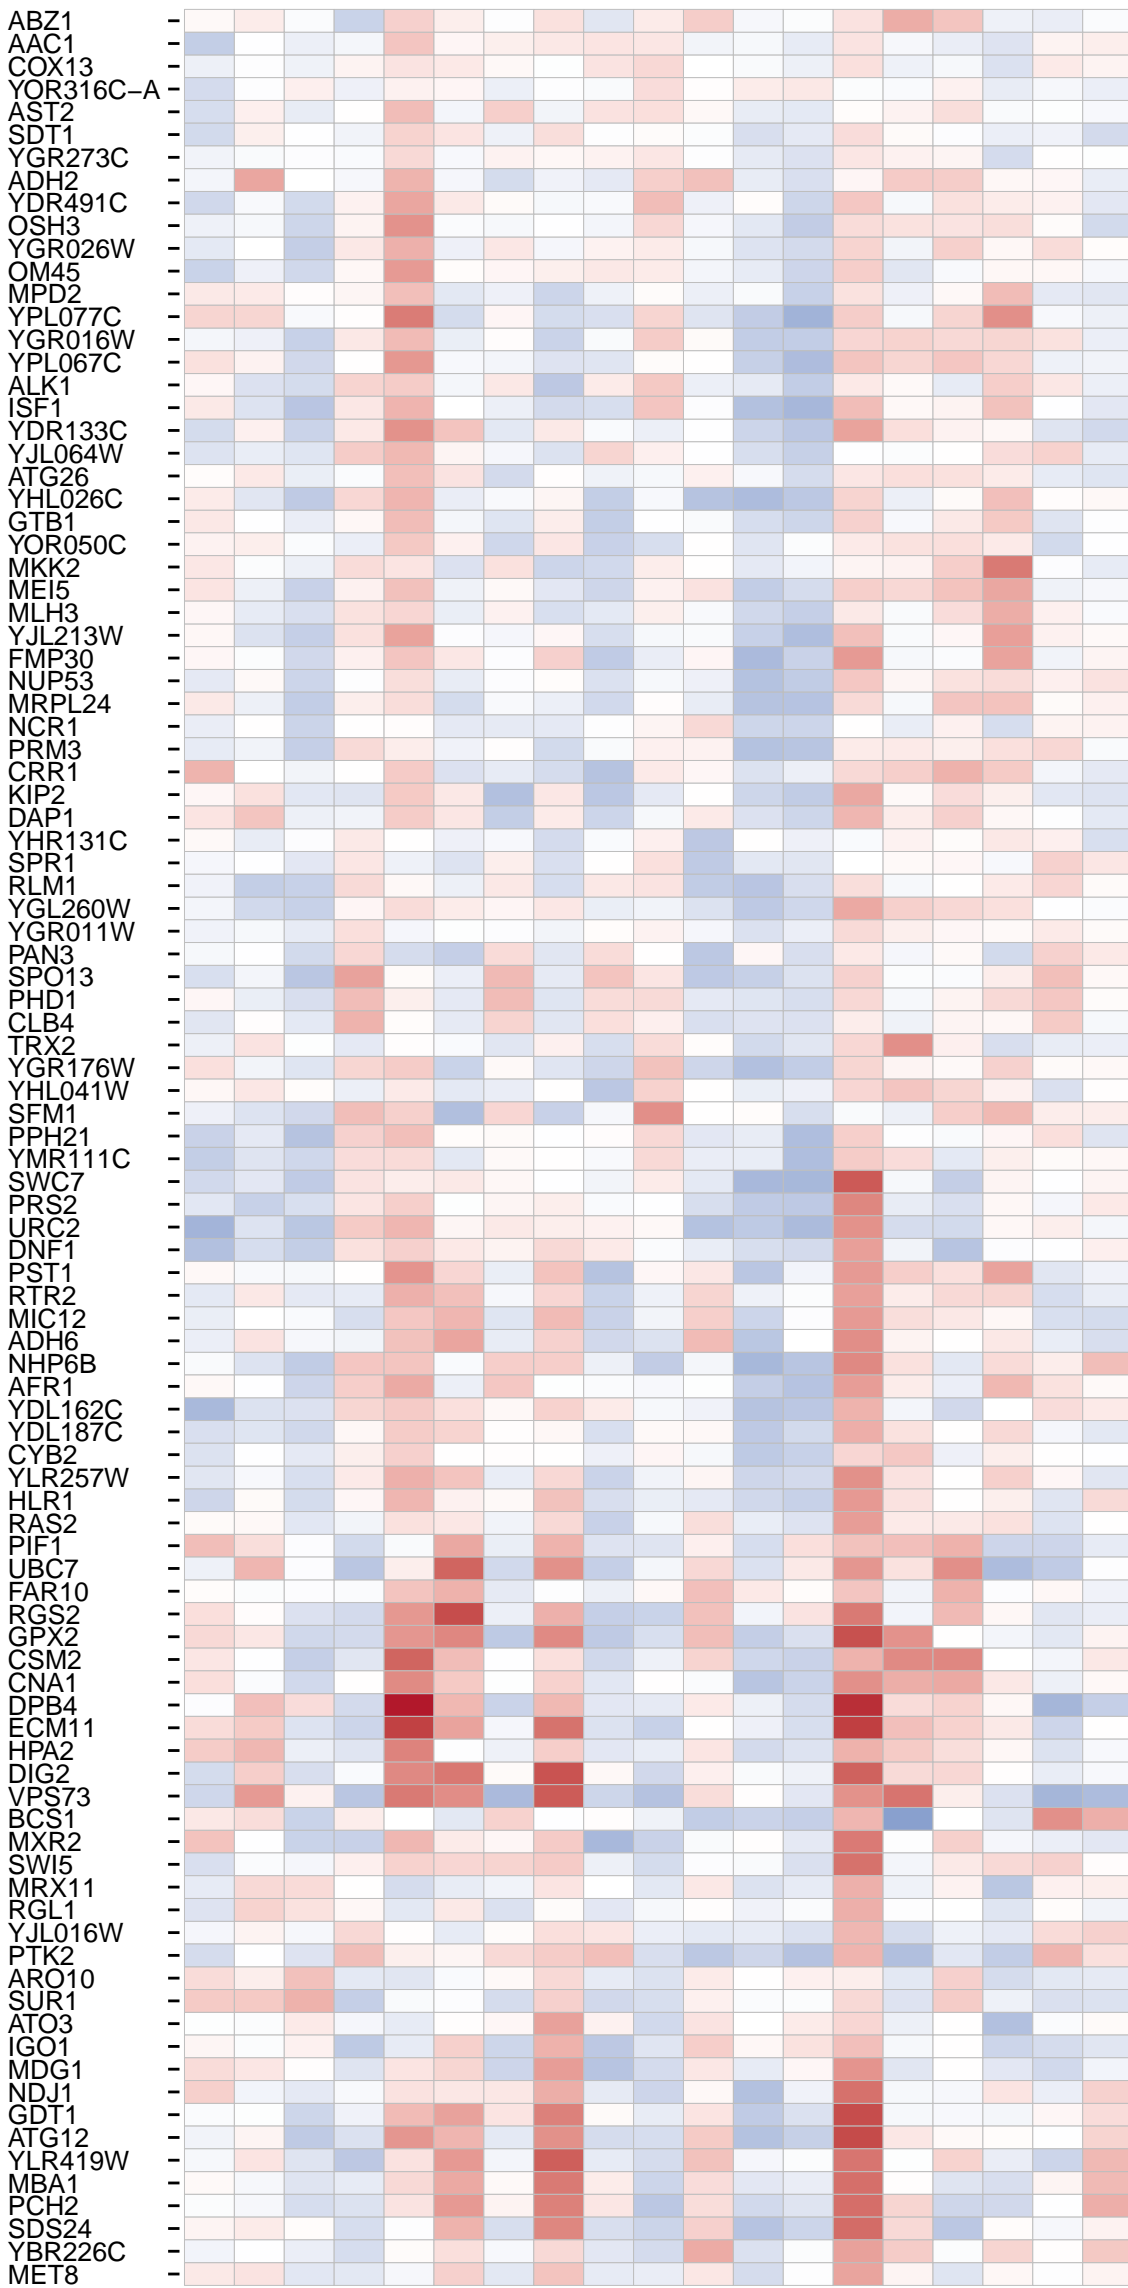

alanine -  
aspartate -  
glutamate -  
phenylalanine -  
glycine -  
histidine -  
isoleucine -  
lysine -  
leucine -  
methionine -  
asparagine -  
proline -  
glutamine -  
arginine -  
serine -  
threonine -  
valine -  
tryptophan -  
tyrosine -

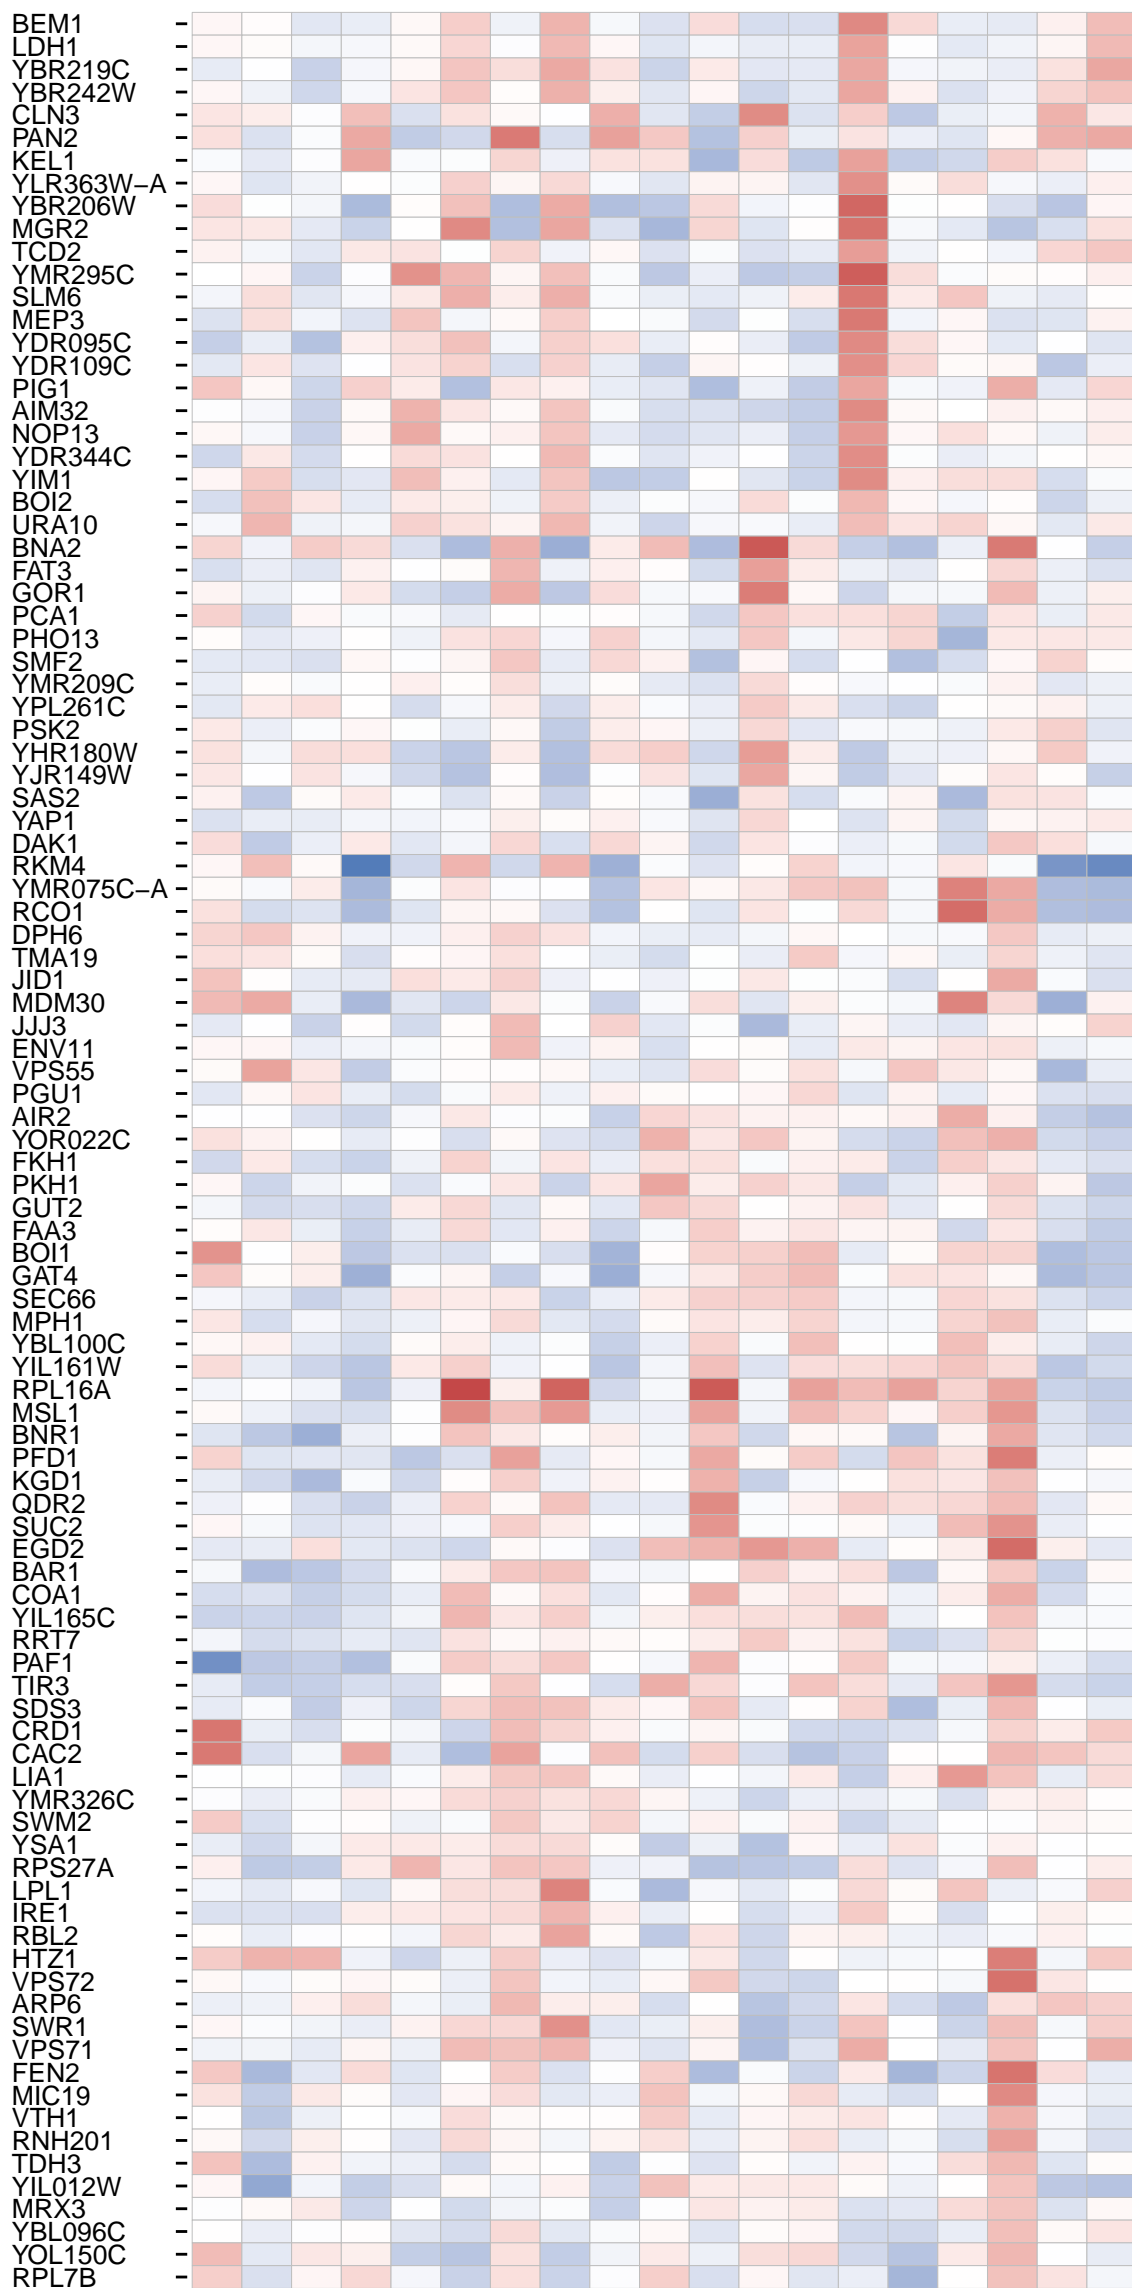

alanine -  
aspartate -  
glutamate -  
phenylalanine -  
glycine -  
histidine -  
isoleucine -  
lysine -  
leucine -  
methionine -  
asparagine -  
proline -  
glutamine -  
arginine -  
serine -  
threonine -  
valine -  
tryptophan -  
tyrosine -

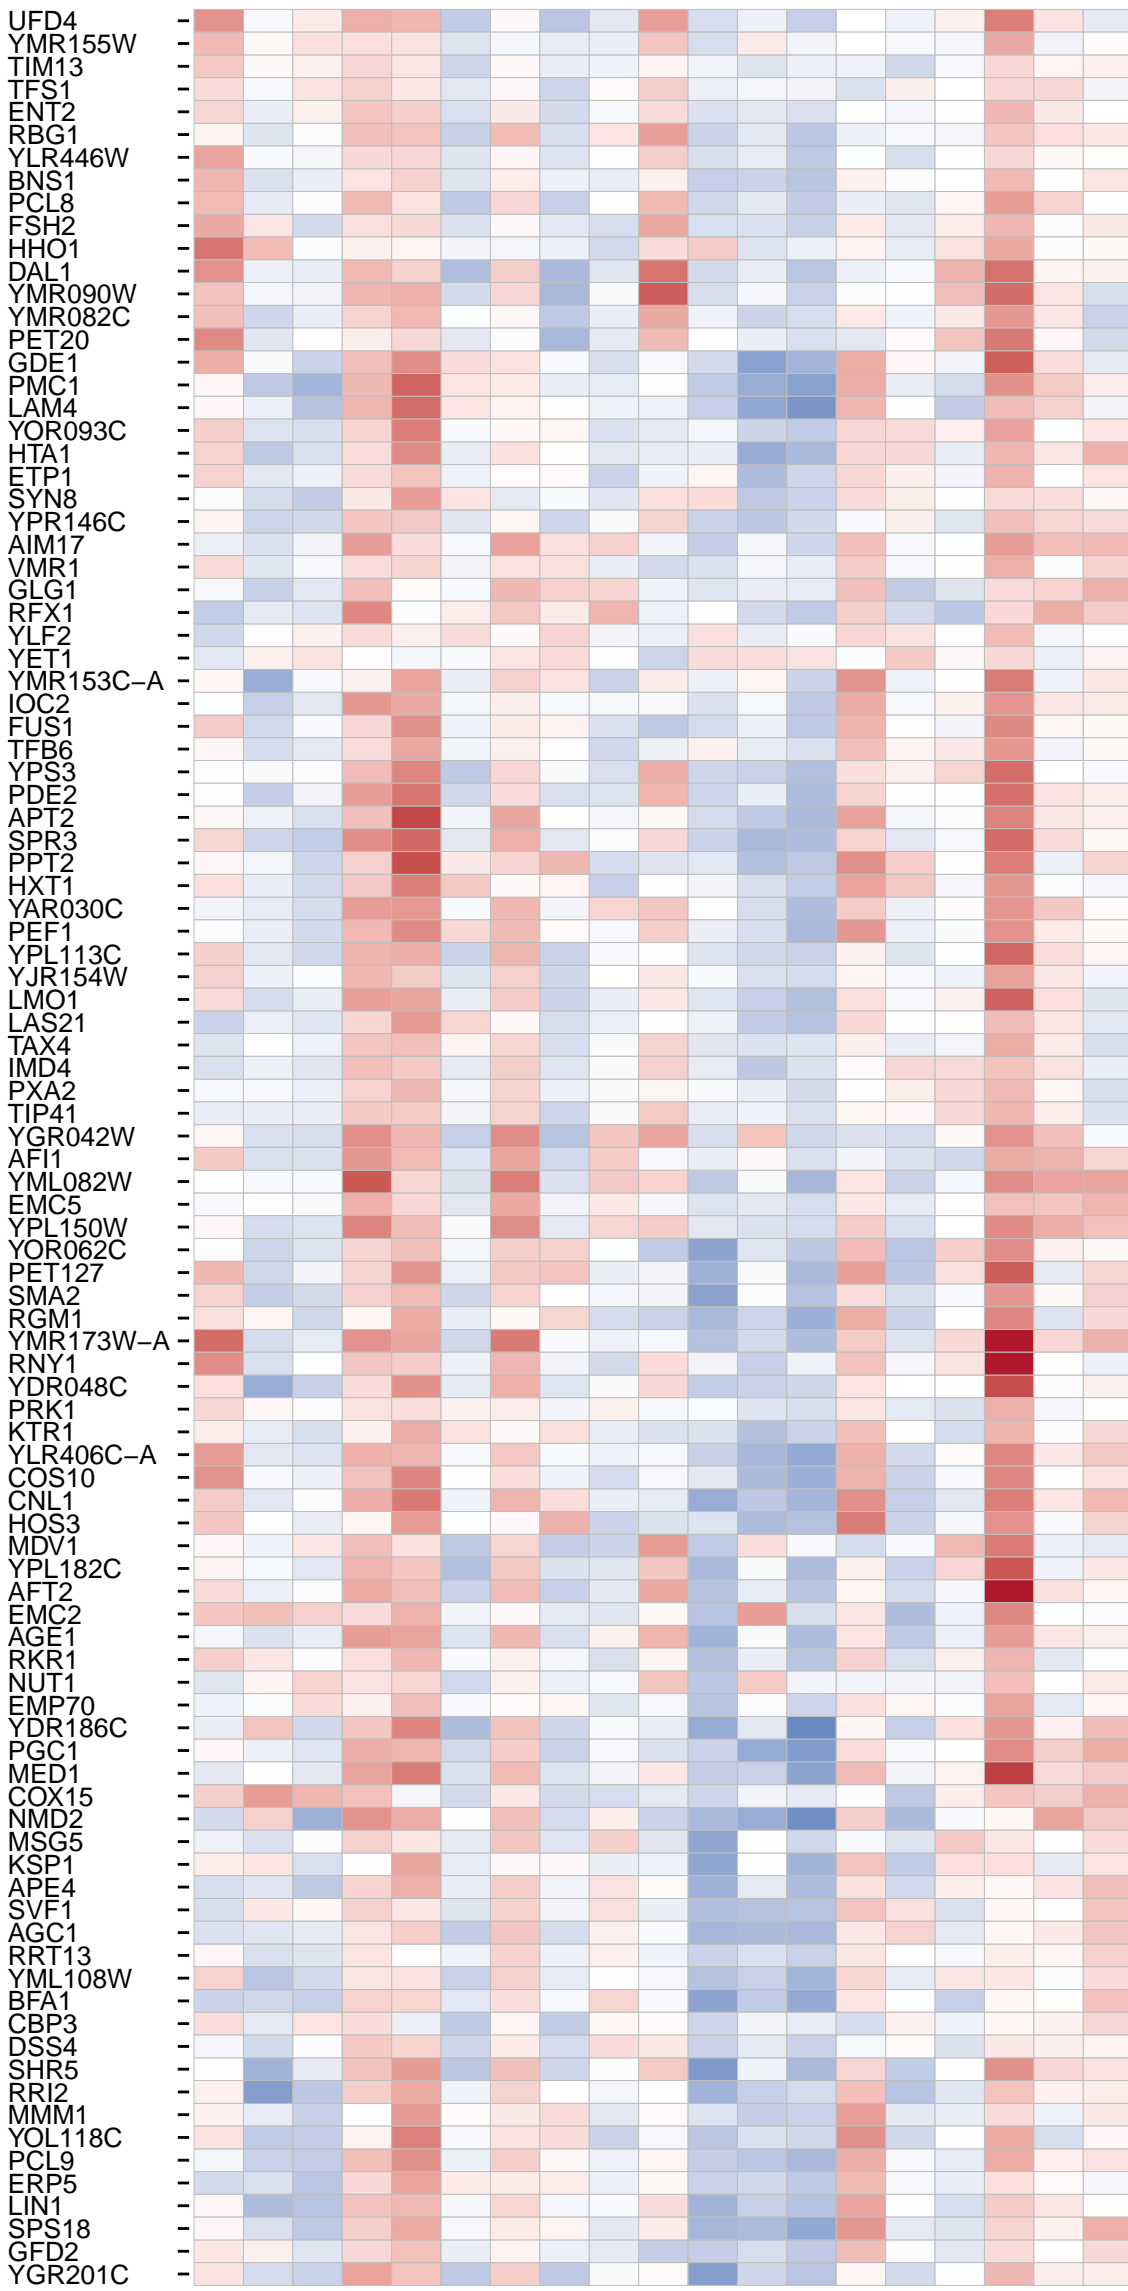

alanine -  
aspartate -  
glutamate -  
phenylalanine -  
glycine -  
histidine -  
isoleucine -  
lysine -  
leucine -  
methionine -  
asparagine -  
proline -  
glutamine -  
arginine -  
serine -  
threonine -  
valine -  
tryptophan -  
tyrosine -

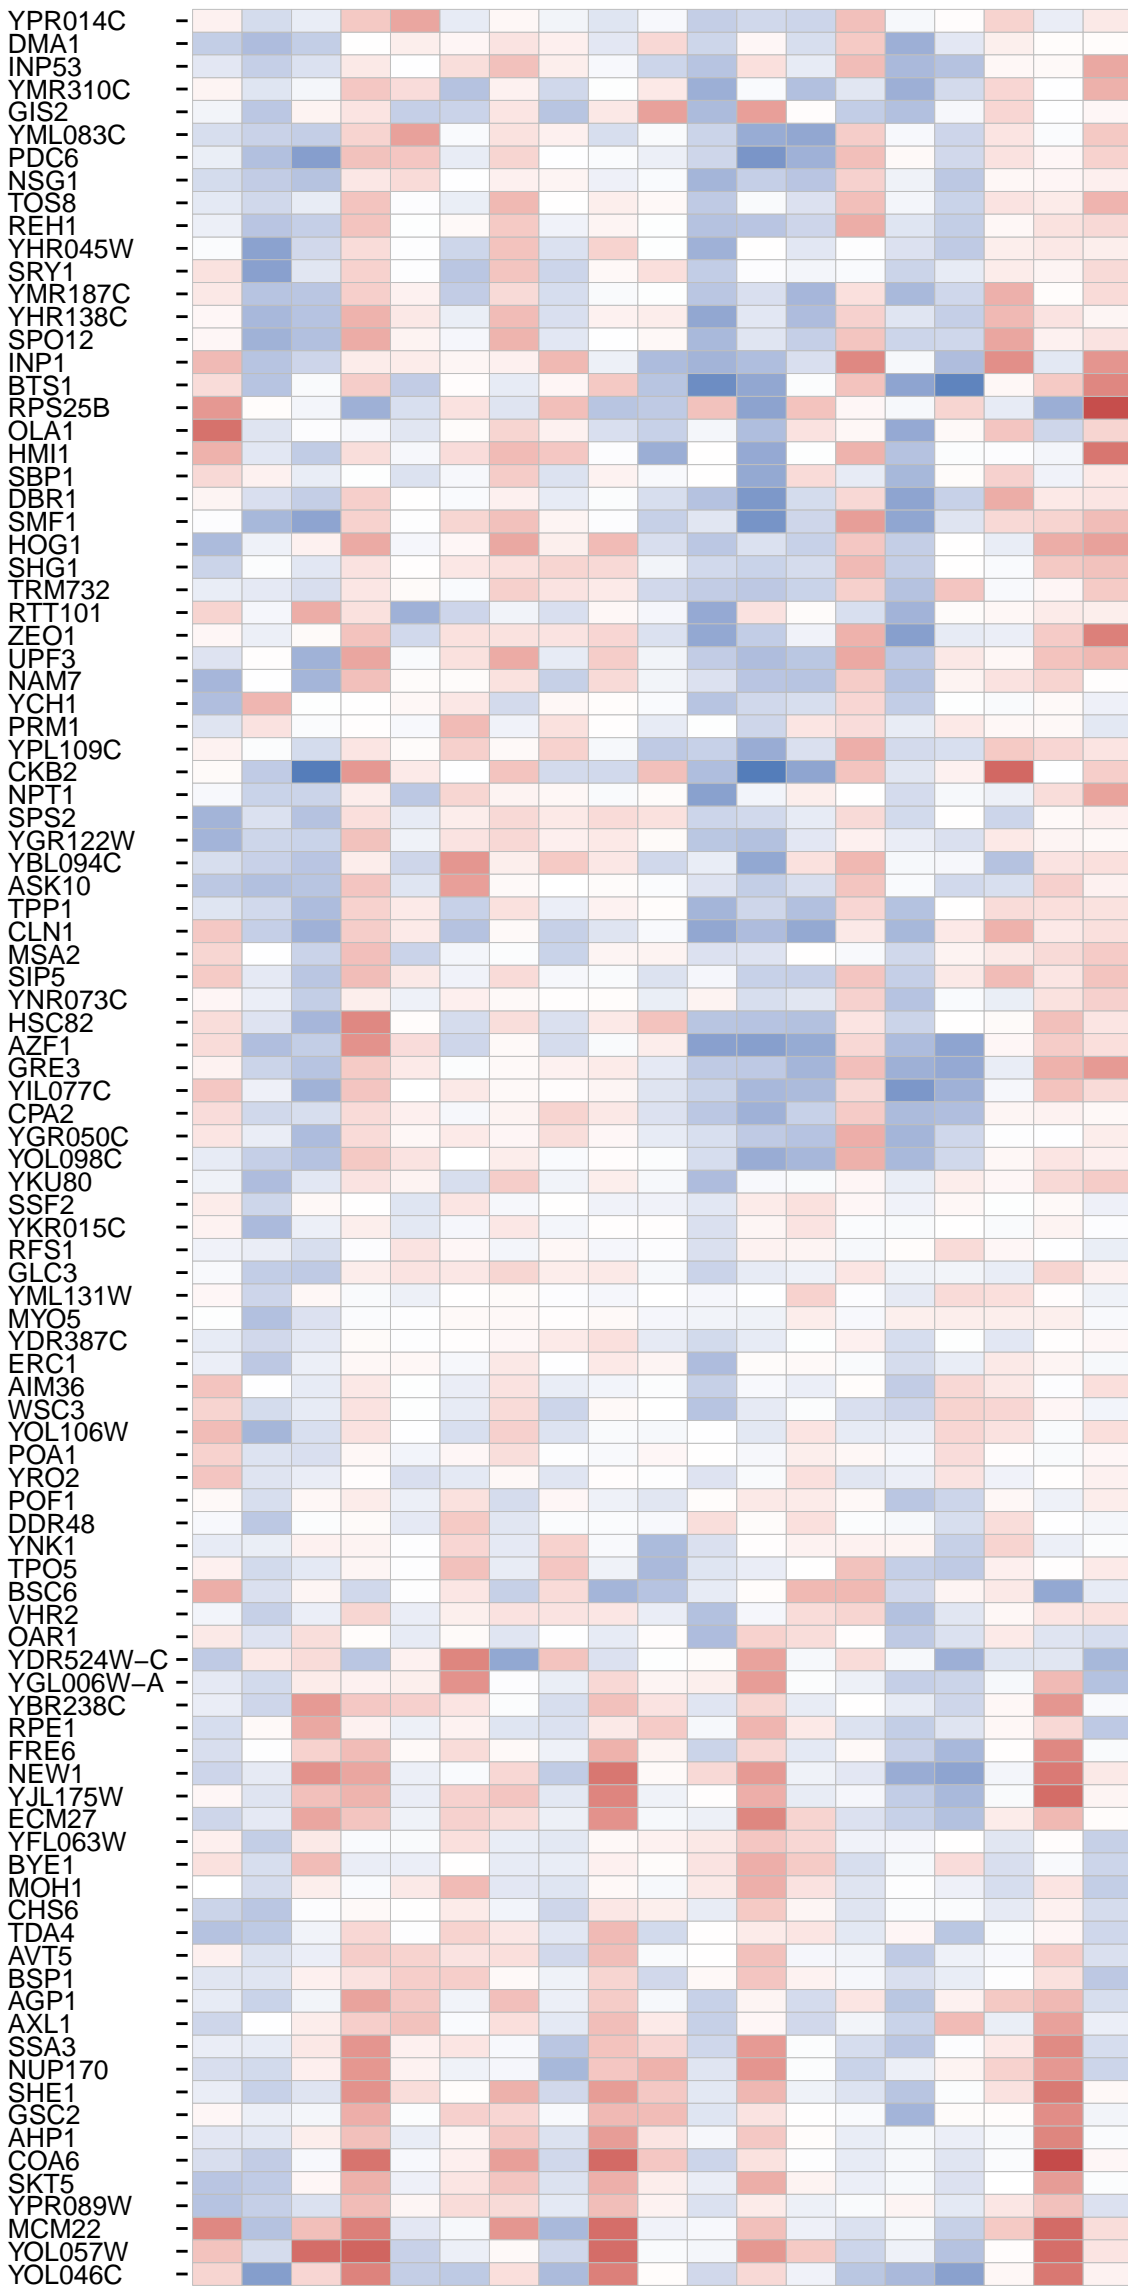

alanine -  
aspartate -  
glutamate -  
phenylalanine -  
glycine -  
histidine -  
isoleucine -  
lysine -  
leucine -  
methionine -  
asparagine -  
proline -  
glutamine -  
arginine -  
serine -  
threonine -  
valine -  
tryptophan -  
tyrosine -

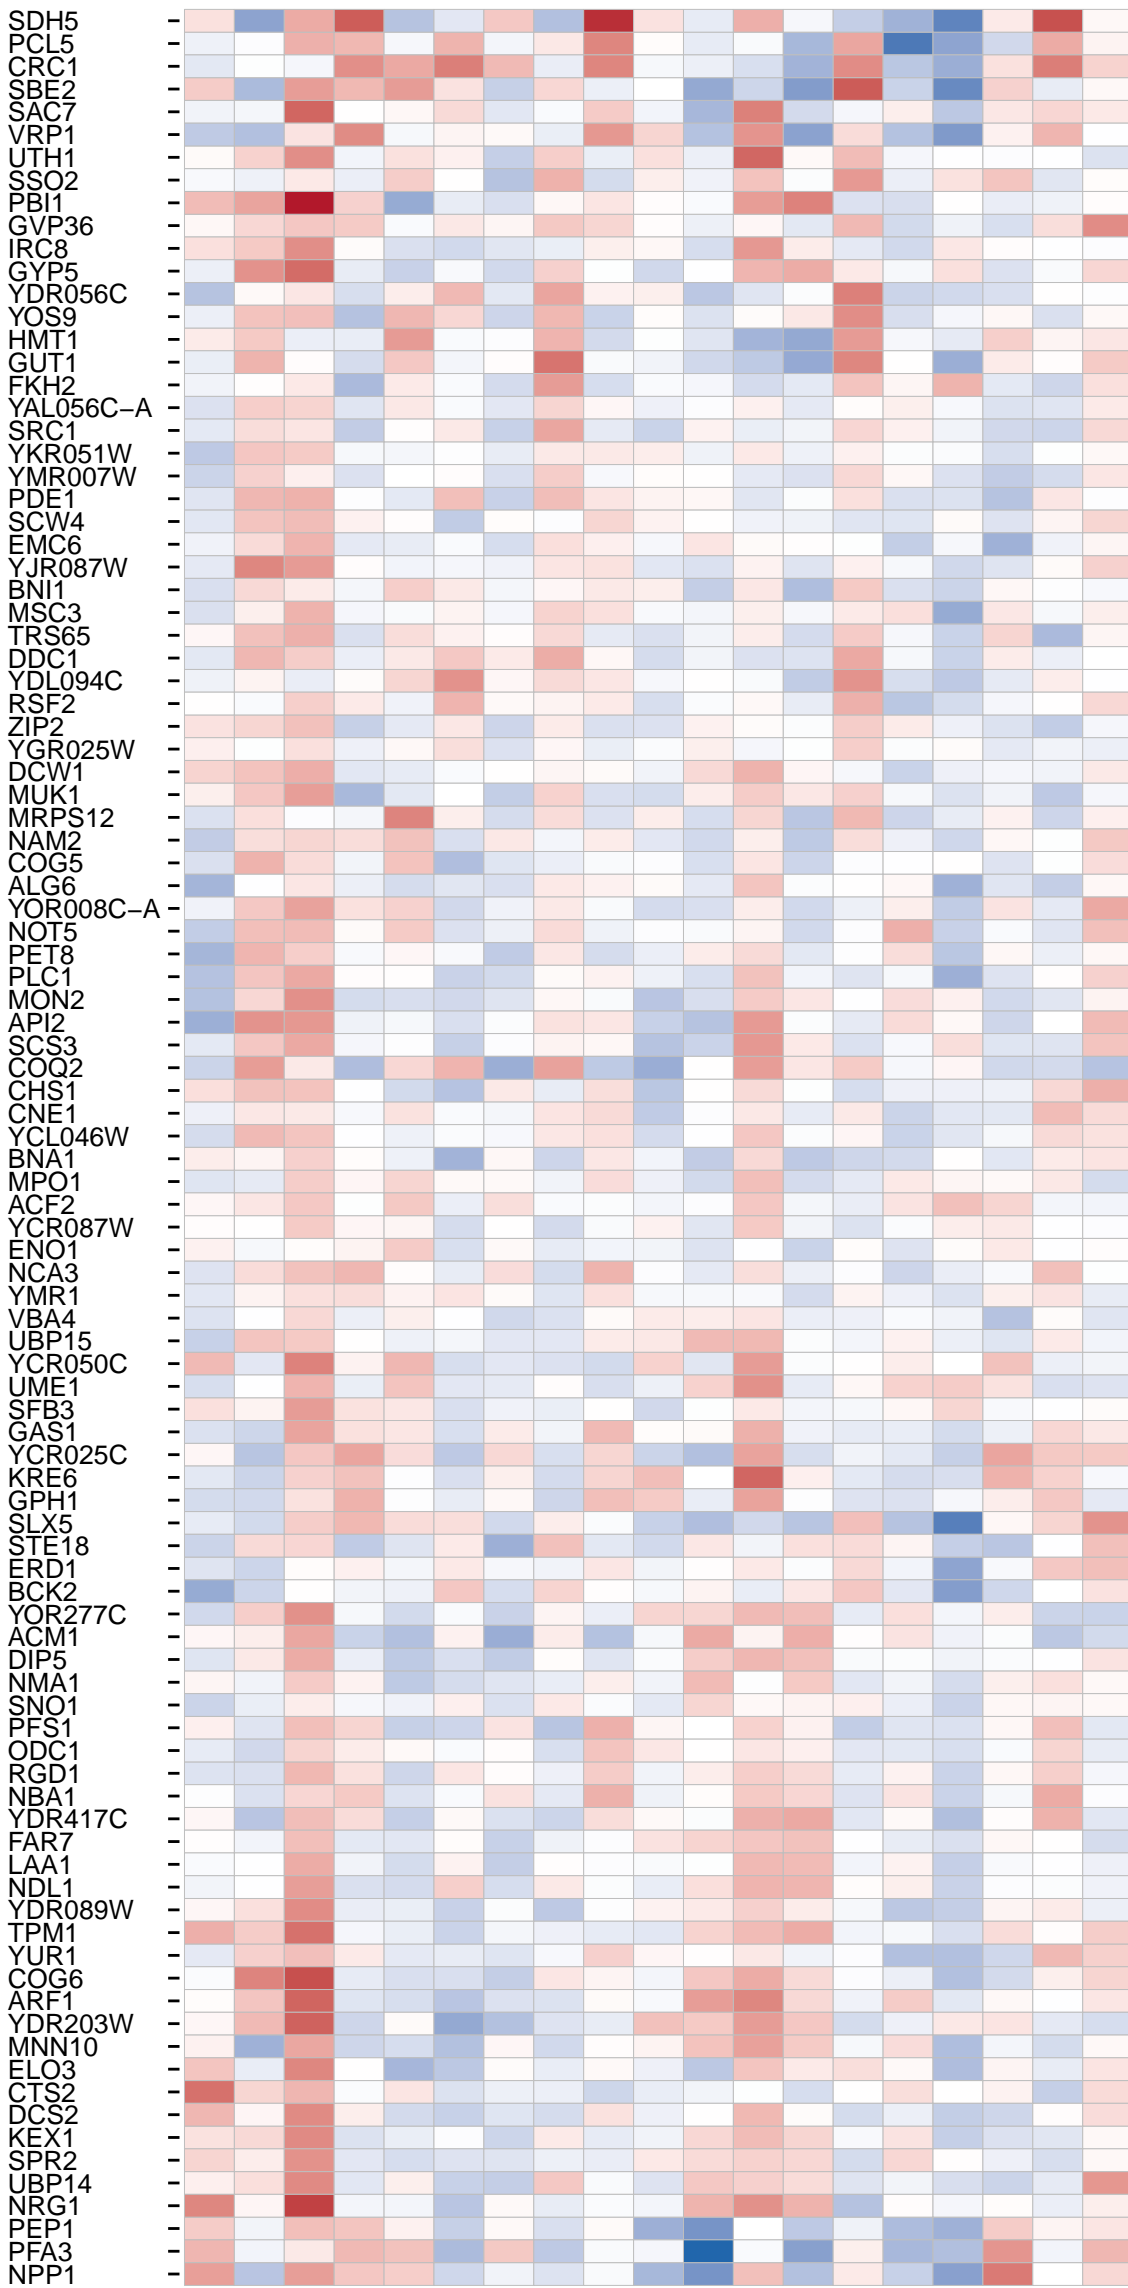

alanine -  
aspartate -  
glutamate -  
phenylalanine -  
glycine -  
histidine -  
isoleucine -  
lysine -  
leucine -  
methionine -  
asparagine -  
proline -  
glutamine -  
arginine -  
serine -  
threonine -  
valine -  
tryptophan -  
tyrosine -



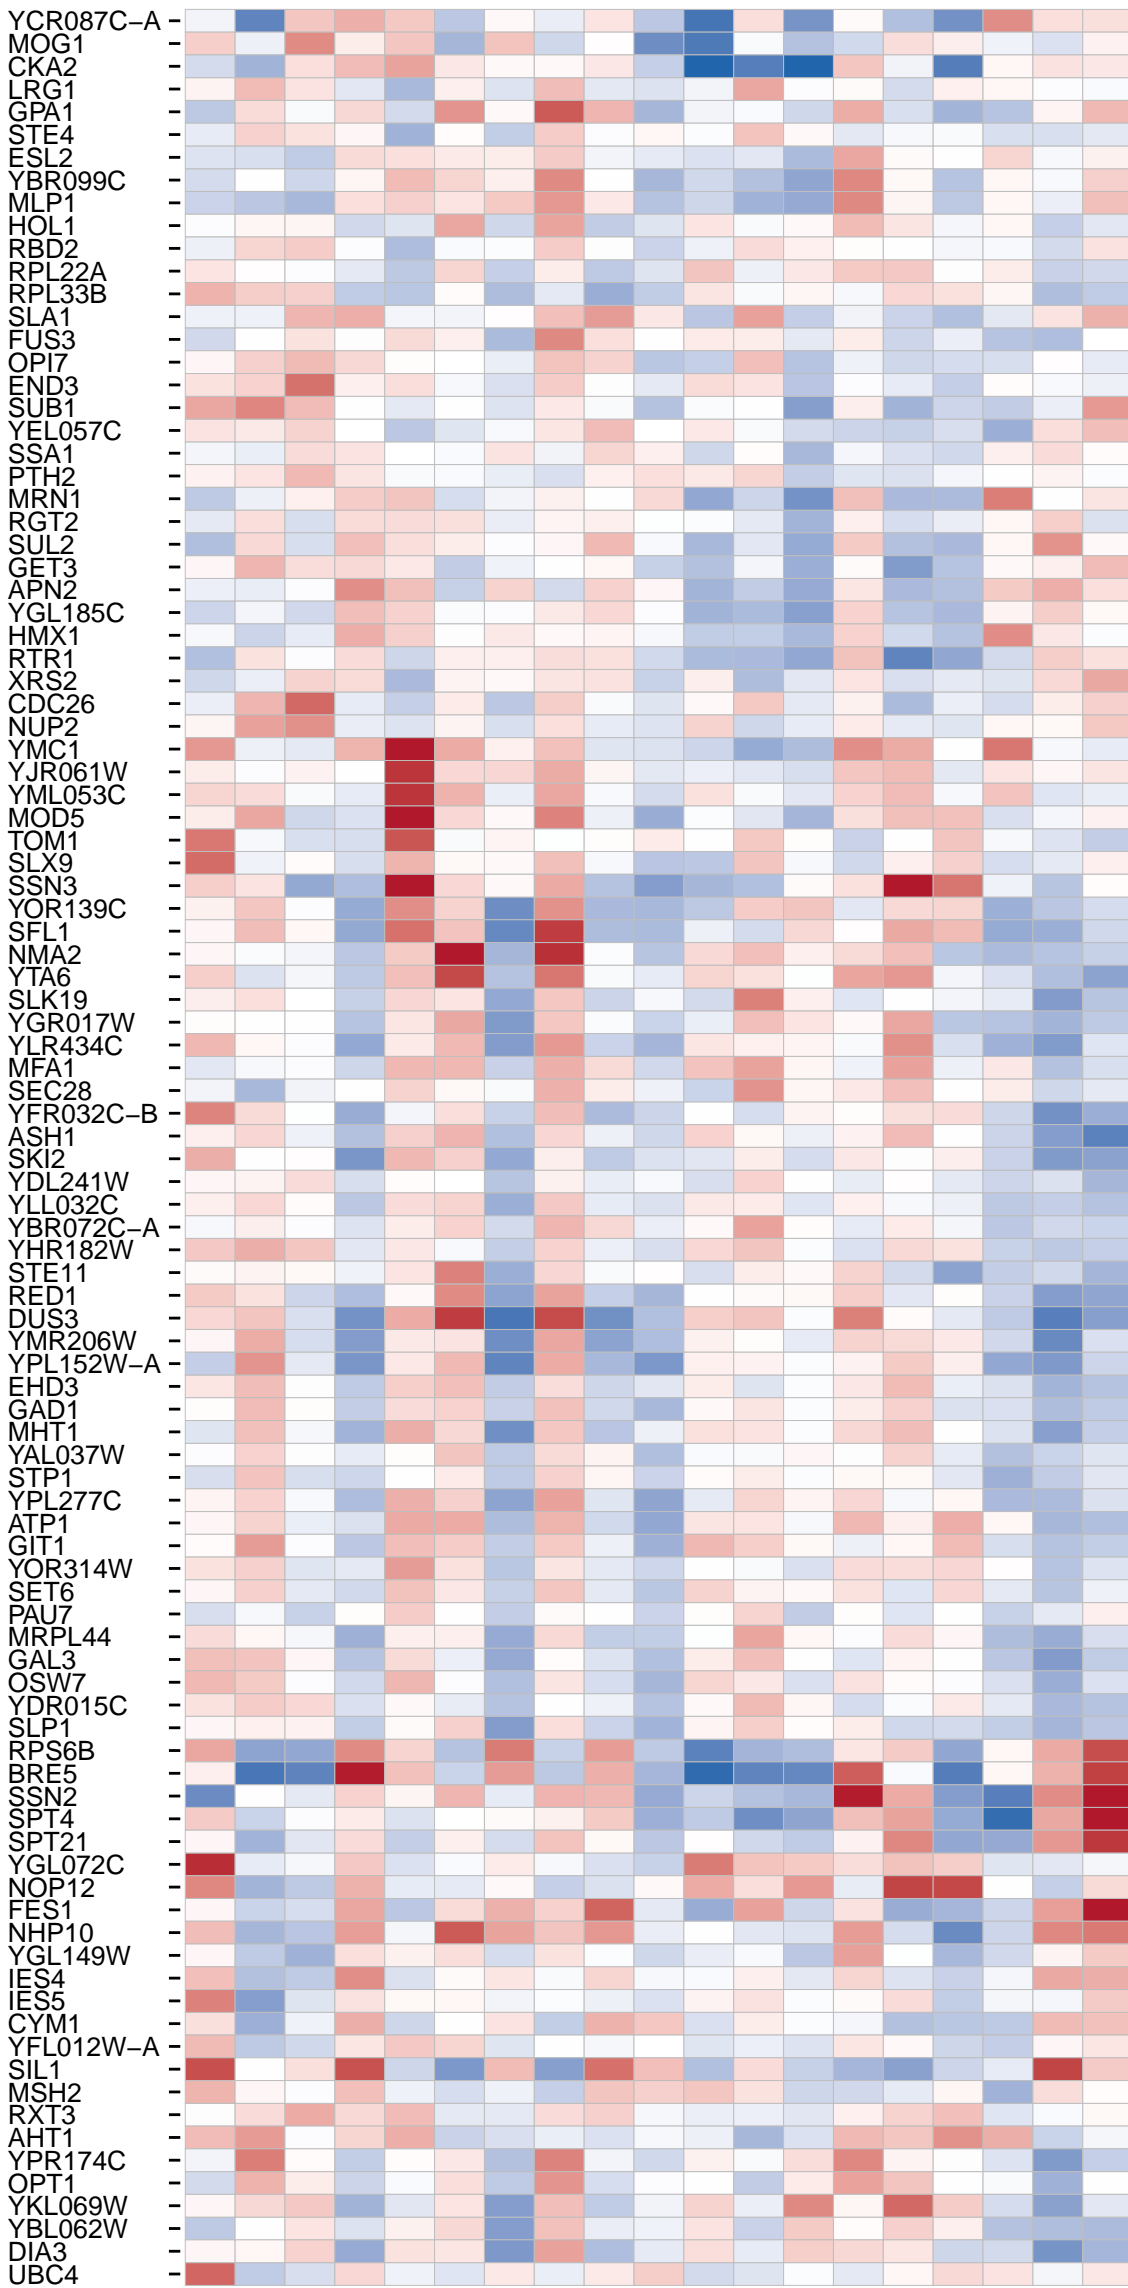

alanine -  
aspartate -  
glutamate -  
phenylalanine -  
glycine -  
histidine -  
isoleucine -  
lysine -  
leucine -  
methionine -  
asparagine -  
proline -  
glutamine -  
arginine -  
serine -  
threonine -  
valine -  
tryptophan -  
tyrosine -

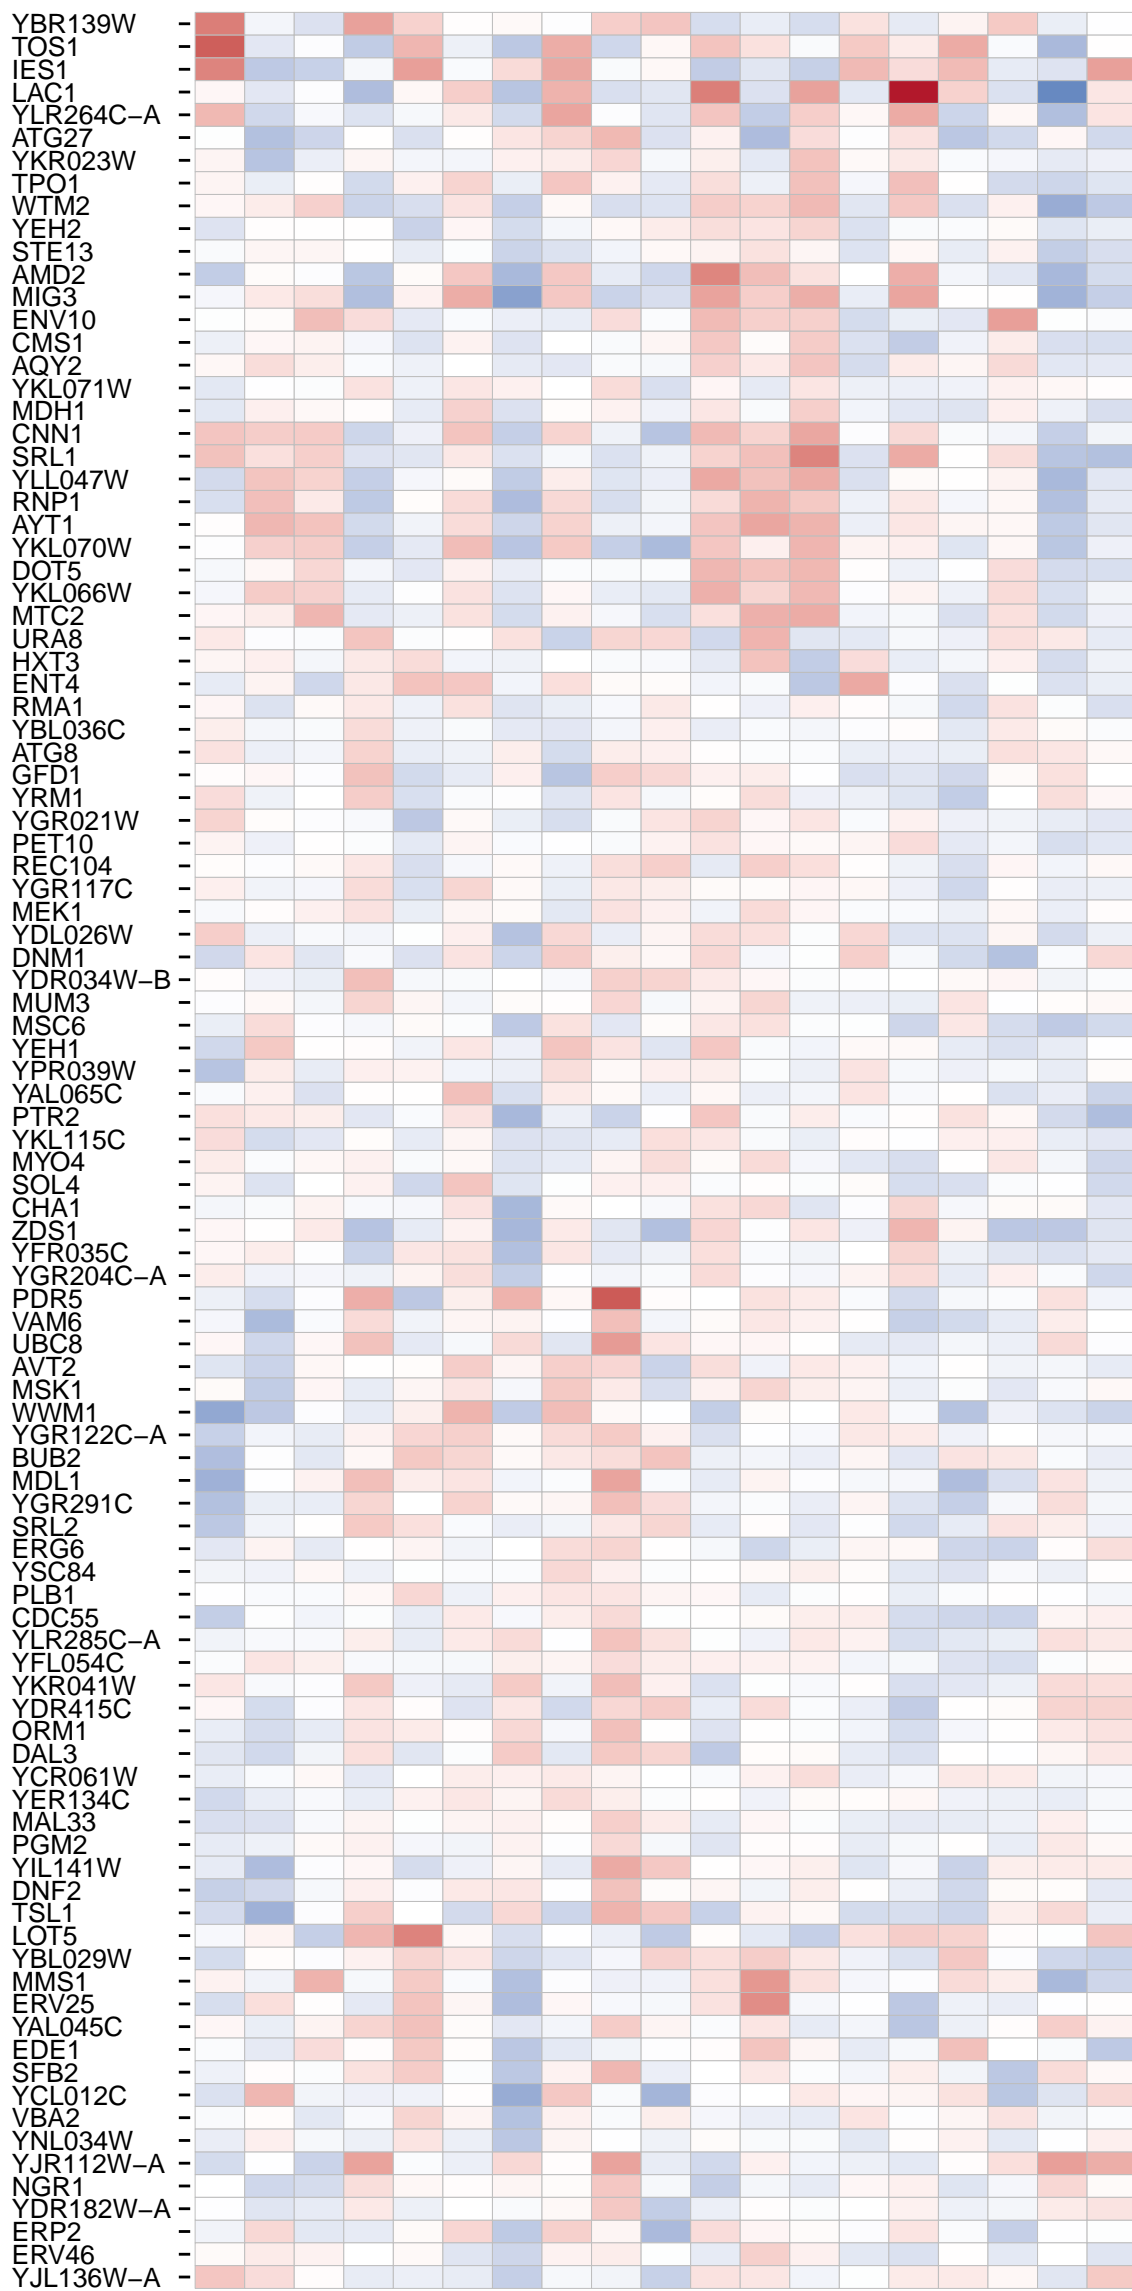

alanine -  
aspartate -  
glutamate -  
phenylalanine -  
glycine -  
histidine -  
isoleucine -  
lysine -  
leucine -  
methionine -  
asparagine -  
proline -  
glutamine -  
arginine -  
serine -  
threonine -  
valine -  
tryptophan -  
tyrosine -

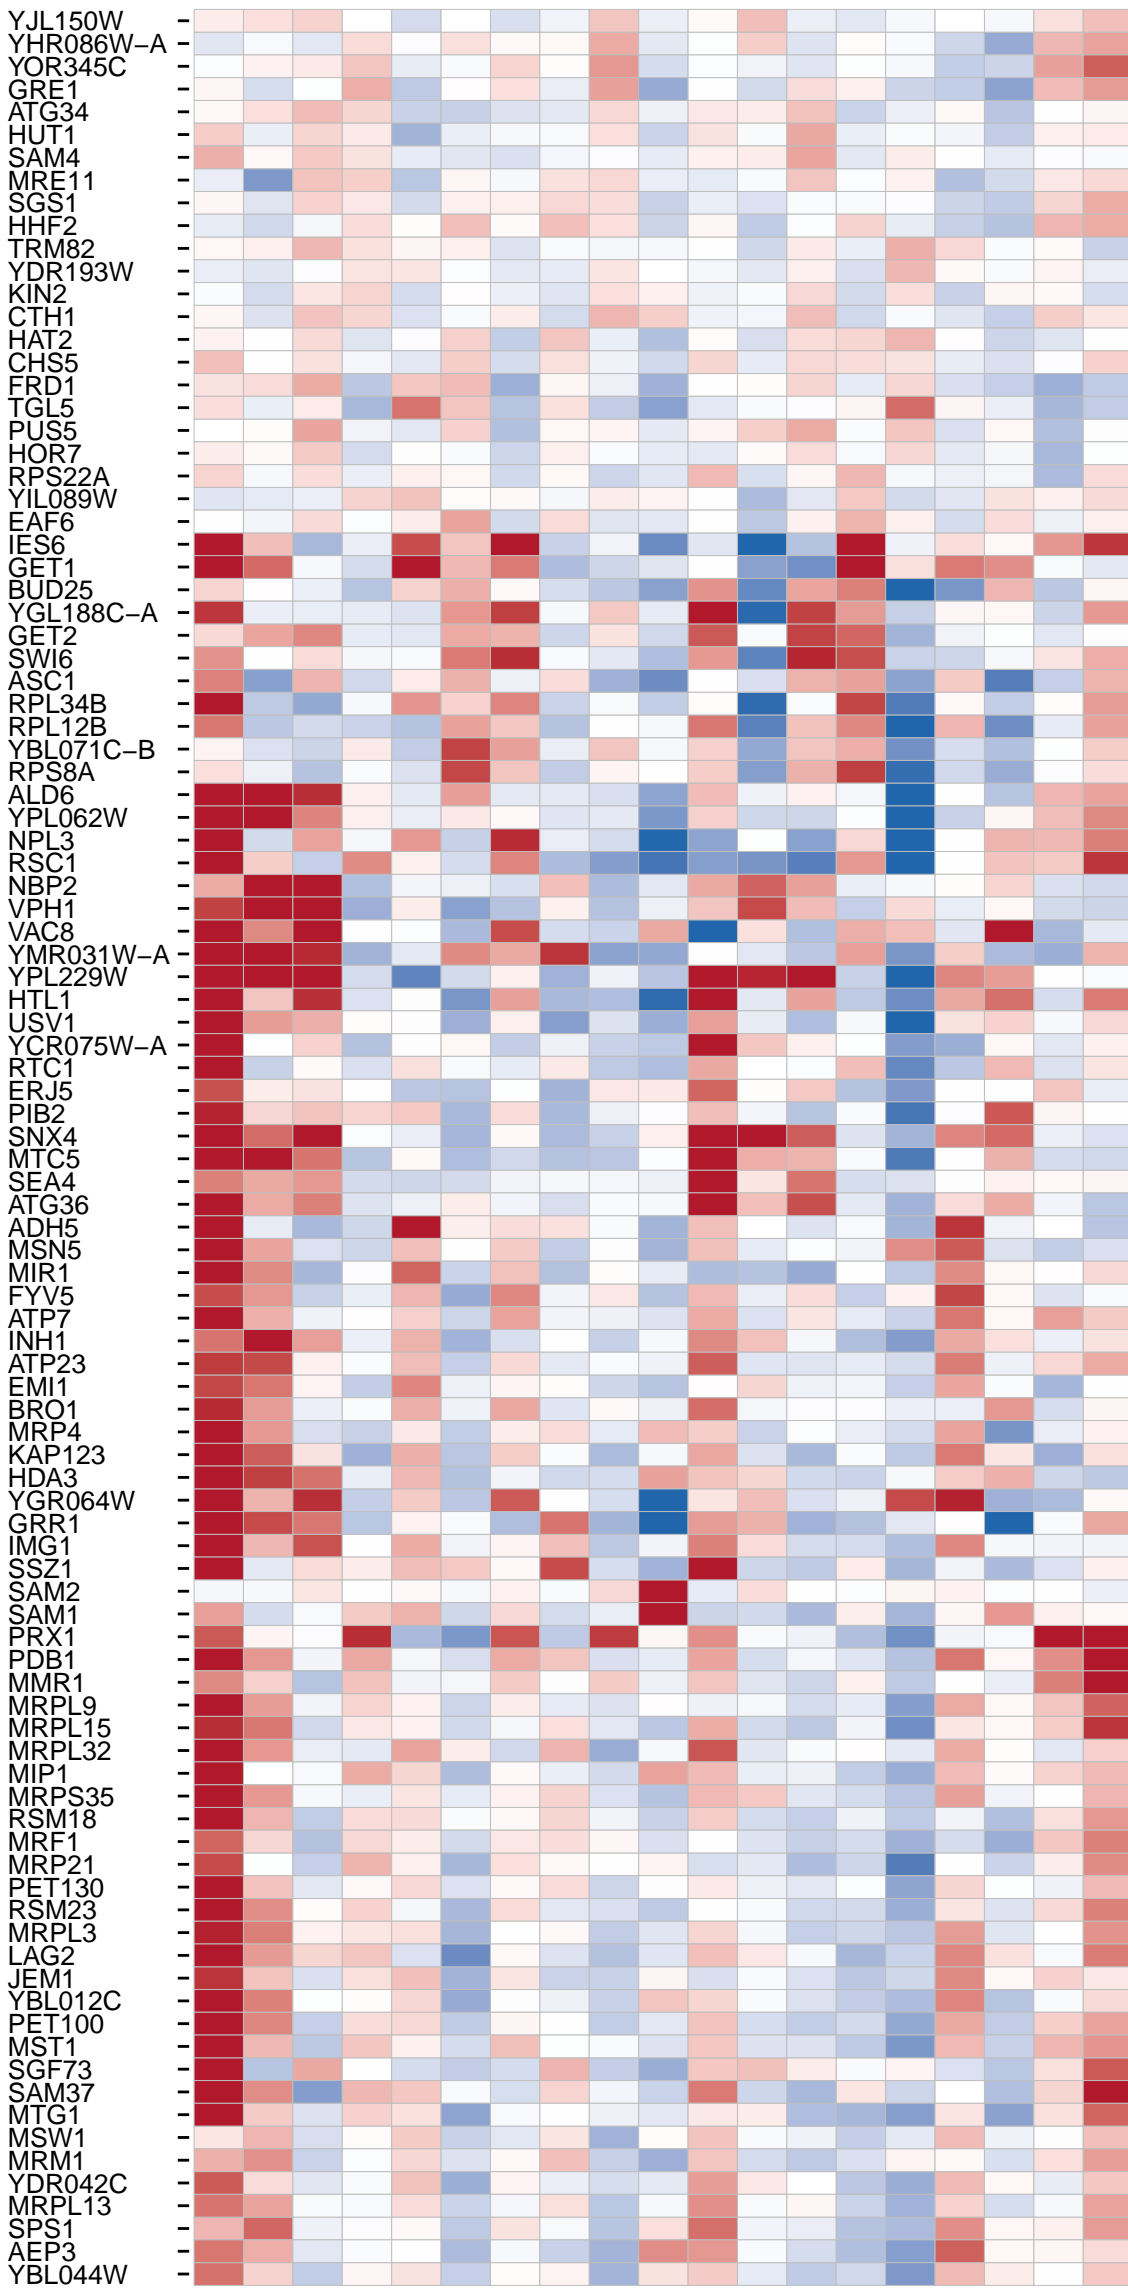

alanine -  
aspartate -  
glutamate -  
phenylalanine -  
glycine -  
histidine -  
isoleucine -  
lysine -  
leucine -  
methionine -  
asparagine -  
proline -  
glutamine -  
arginine -  
serine -  
threonine -  
valine -  
tryptophan -  
tyrosine -

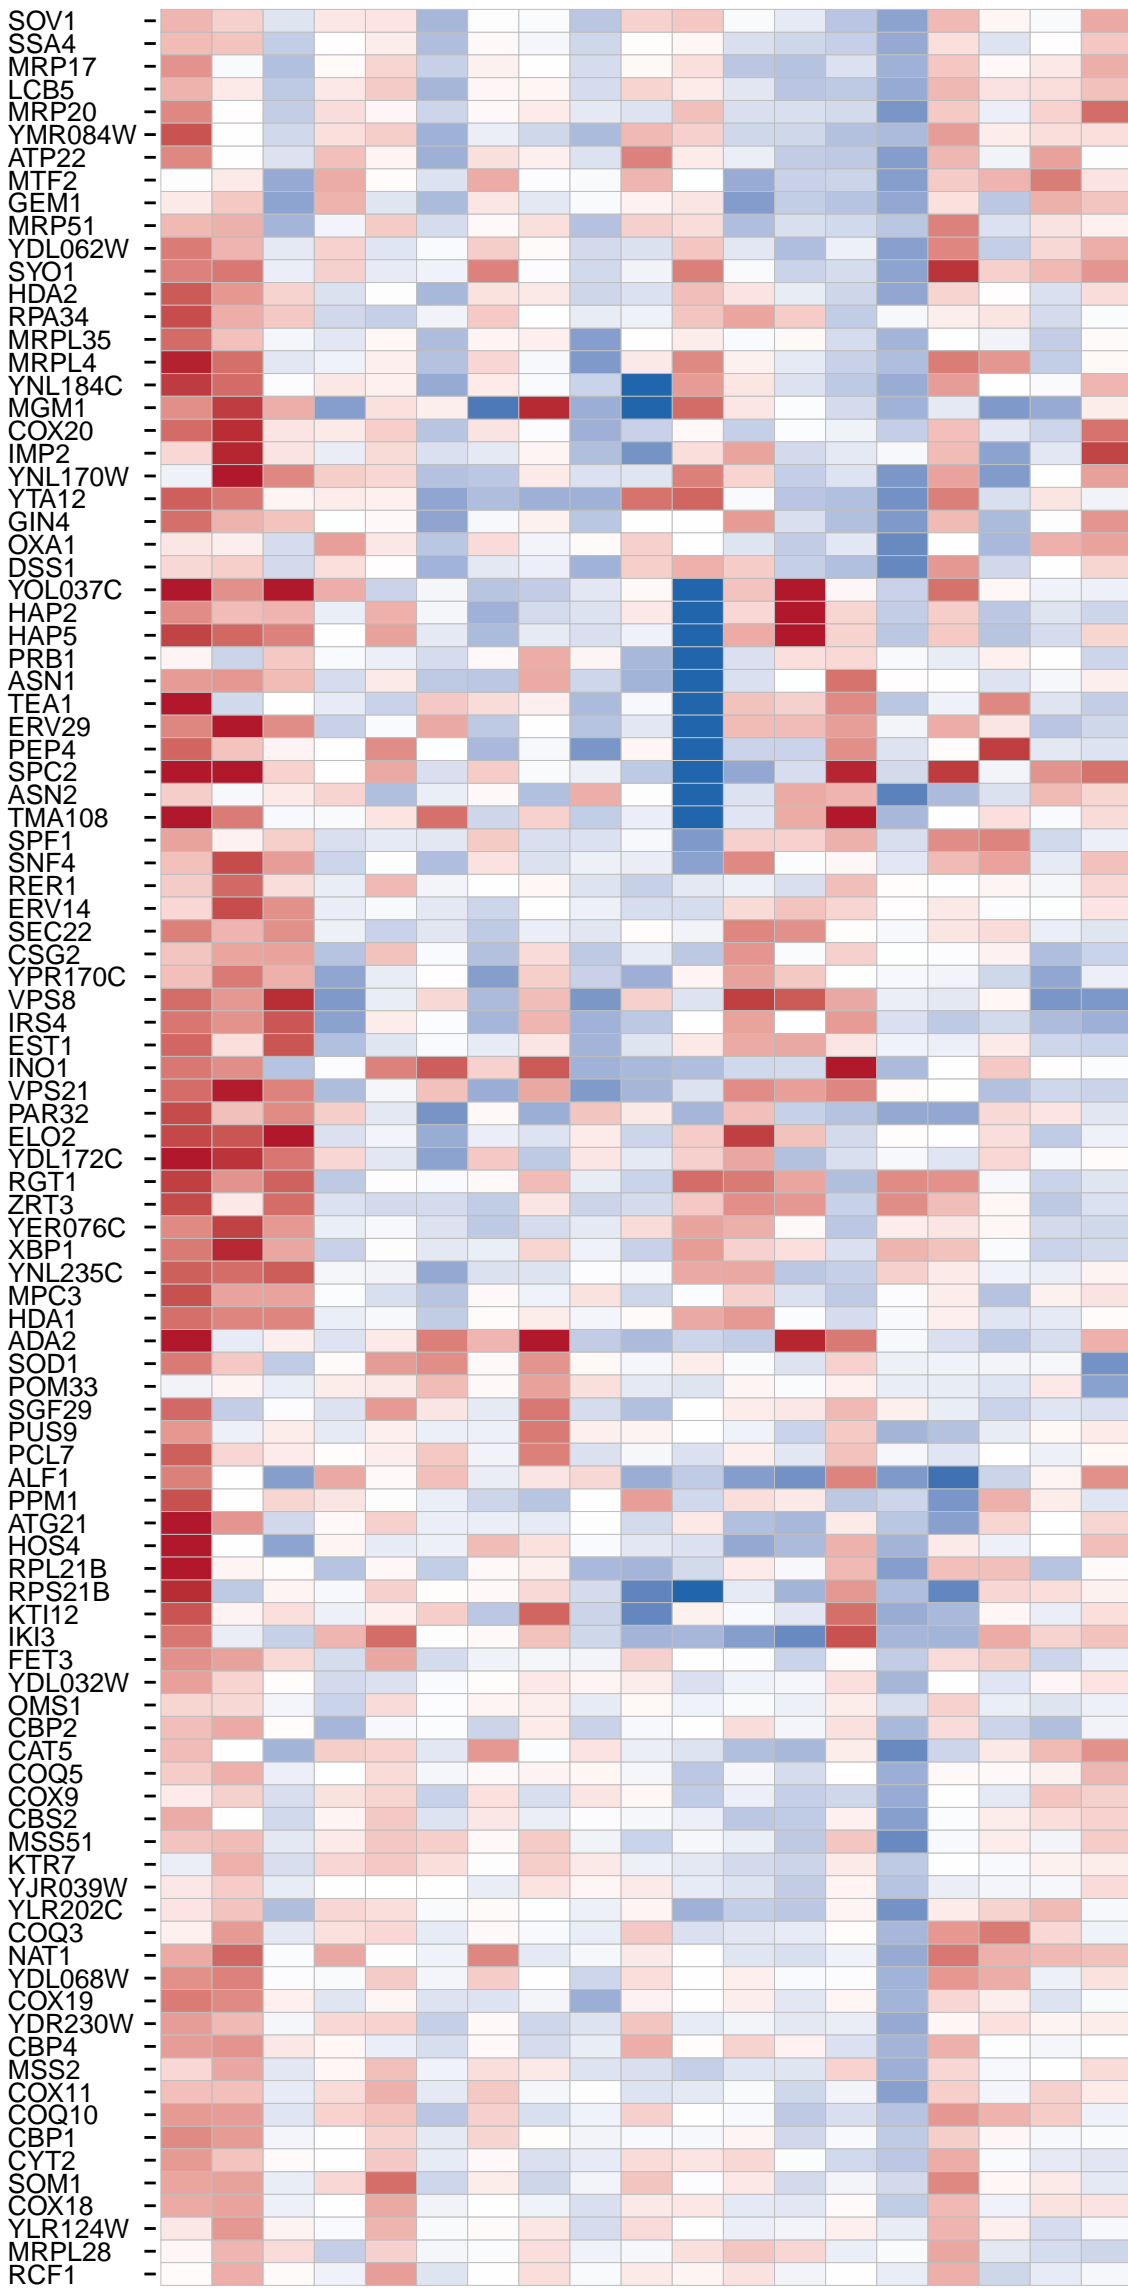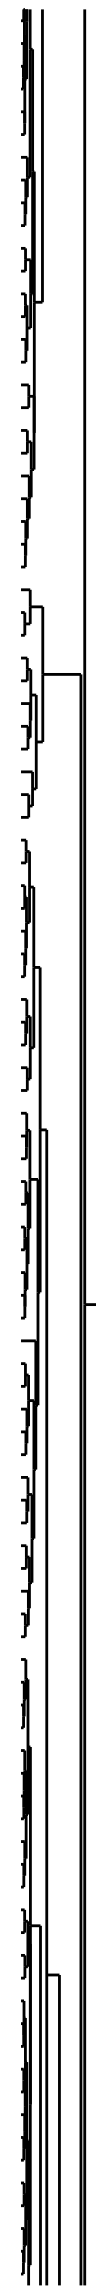

alanine -  
aspartate -  
glutamate -  
phenylalanine -  
glycine -  
histidine -  
isoleucine -  
lysine -  
leucine -  
methionine -  
asparagine -  
proline -  
glutamine -  
arginine -  
serine -  
threonine -  
valine -  
tryptophan -  
tyrosine -

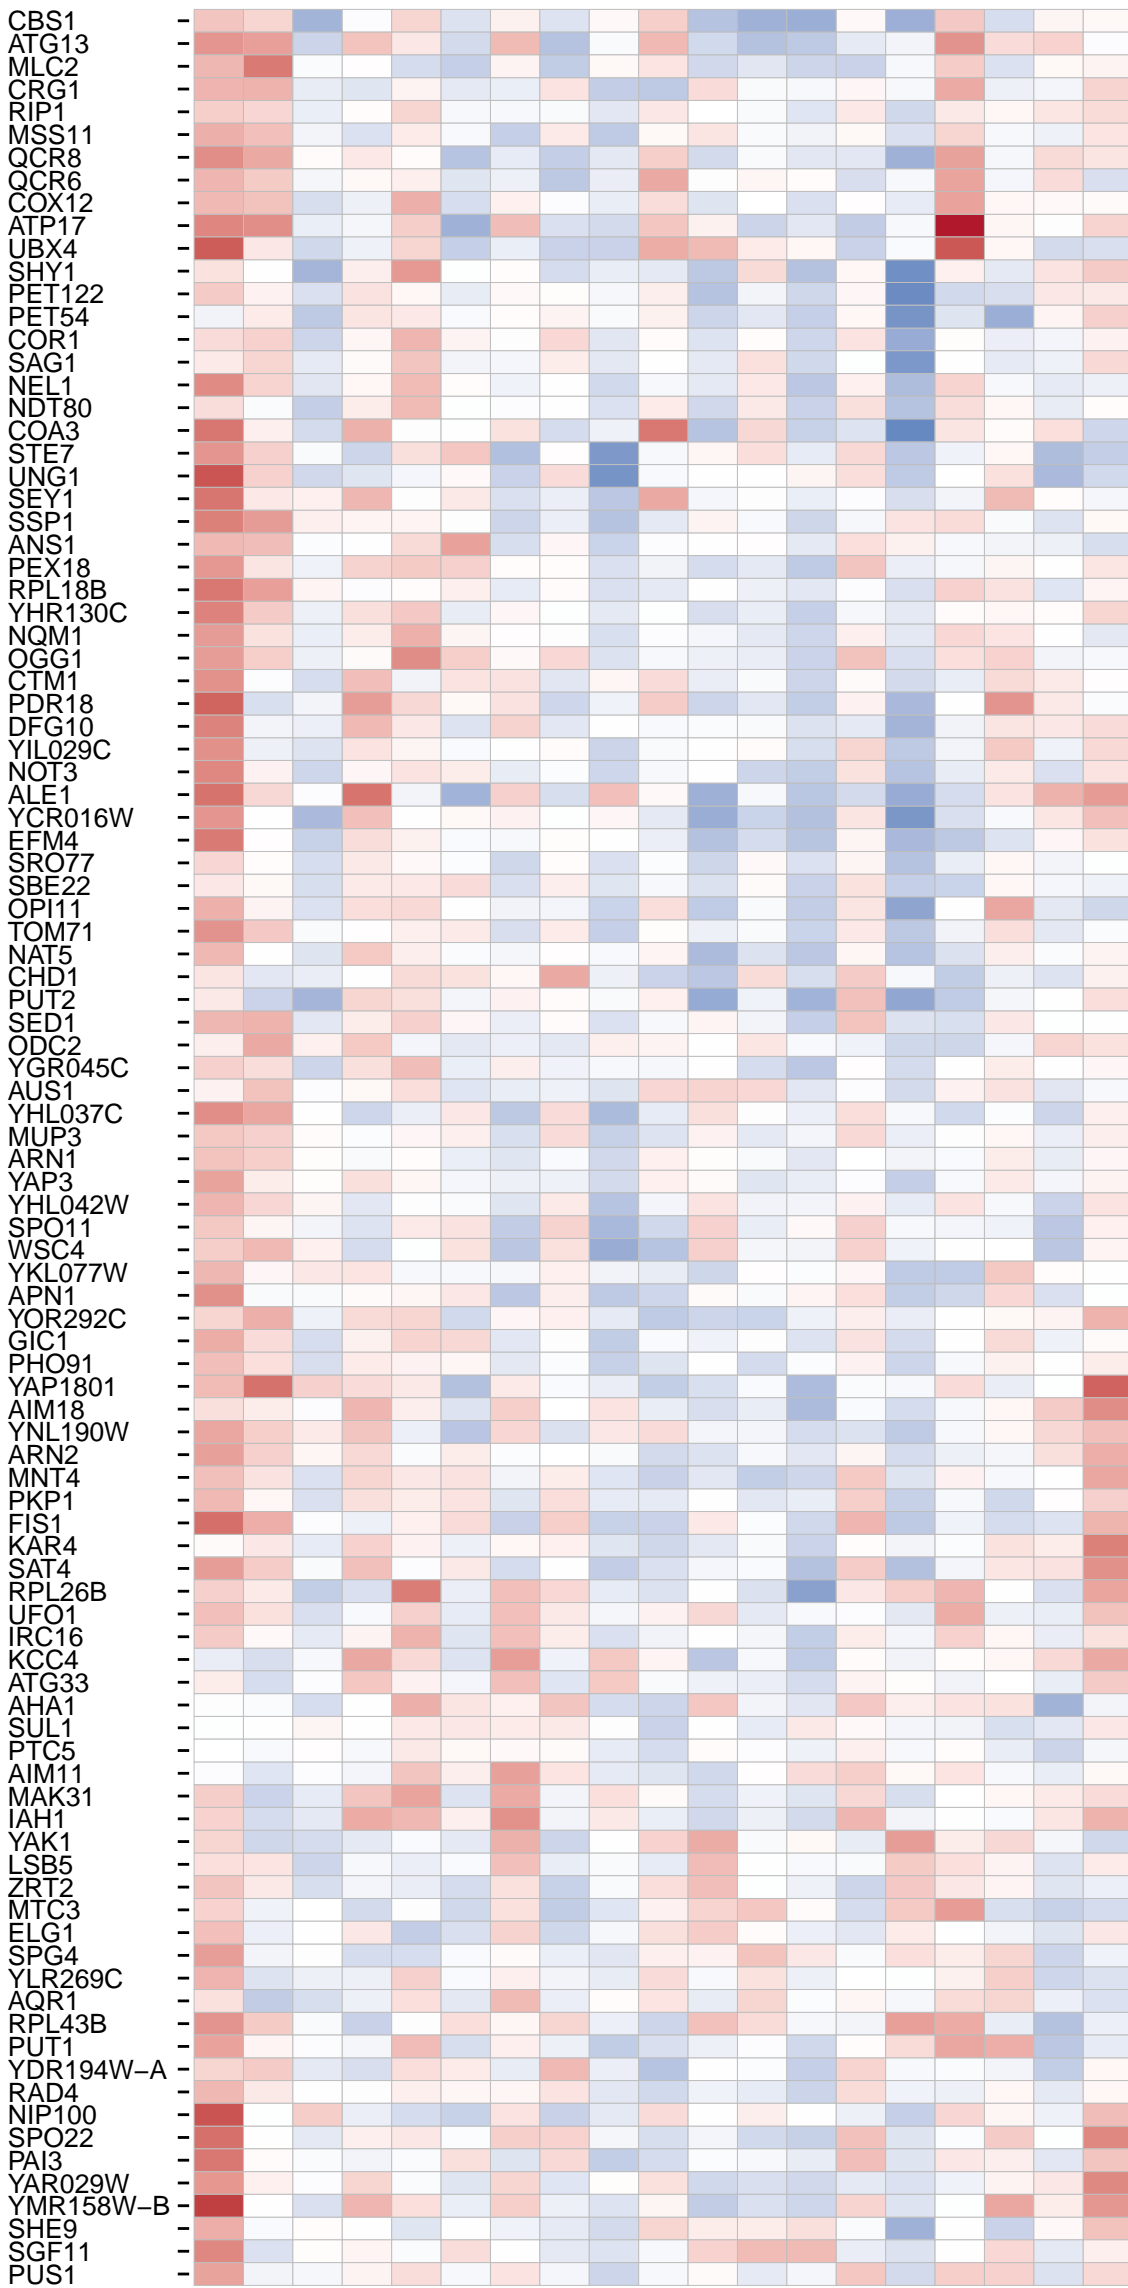

alanine -  
aspartate -  
glutamate -  
phenylalanine -  
glycine -  
histidine -  
isoleucine -  
lysine -  
leucine -  
methionine -  
asparagine -  
proline -  
glutamine -  
arginine -  
serine -  
threonine -  
valine -  
tryptophan -  
tyrosine -

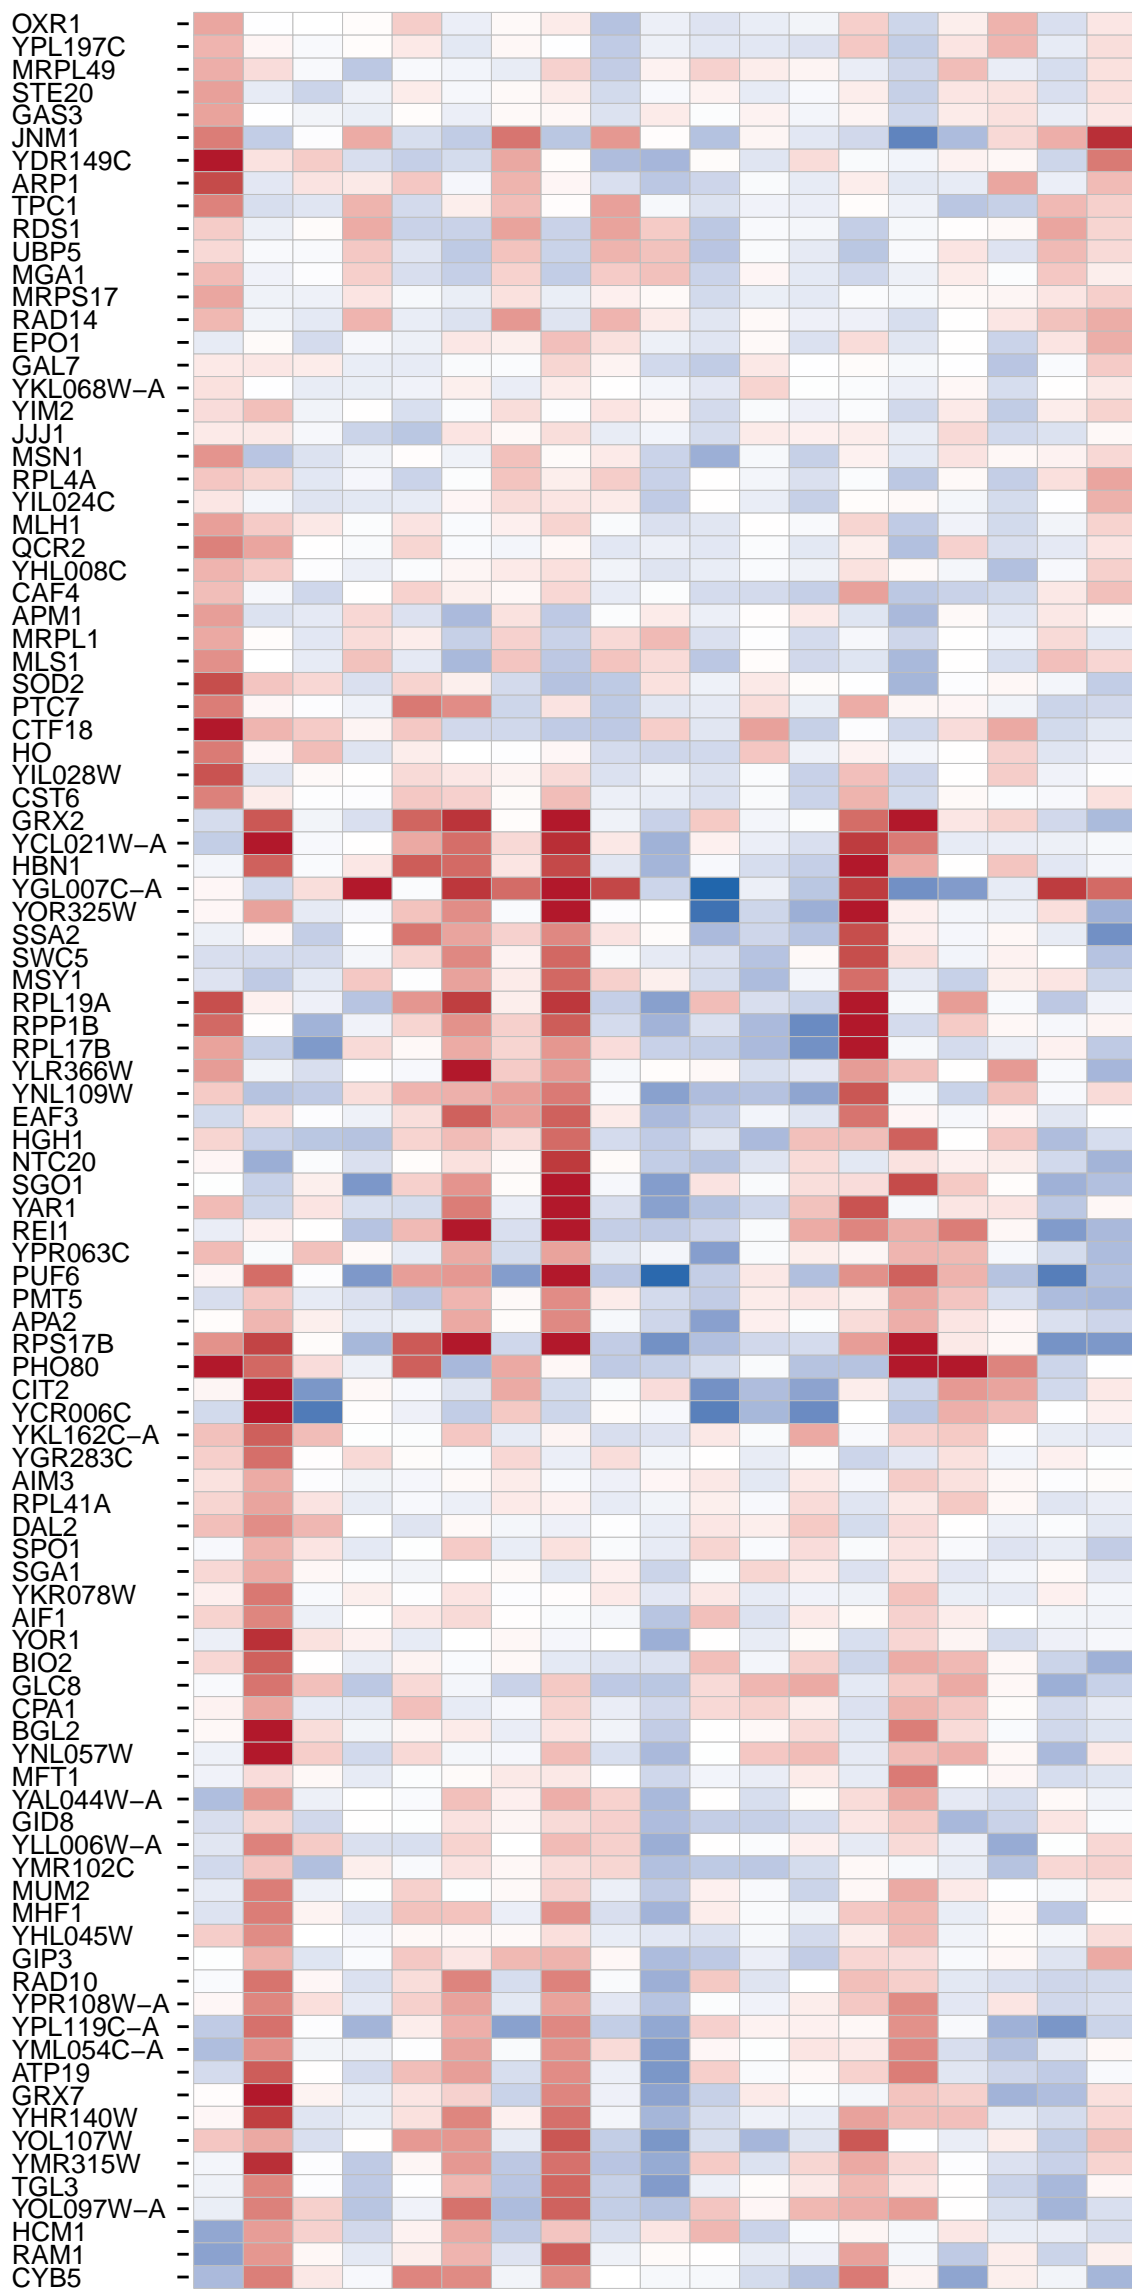

alanine -  
aspartate -  
glutamate -  
phenylalanine -  
glycine -  
histidine -  
isoleucine -  
lysine -  
leucine -  
methionine -  
asparagine -  
proline -  
glutamine -  
arginine -  
serine -  
threonine -  
valine -  
tryptophan -  
tyrosine -

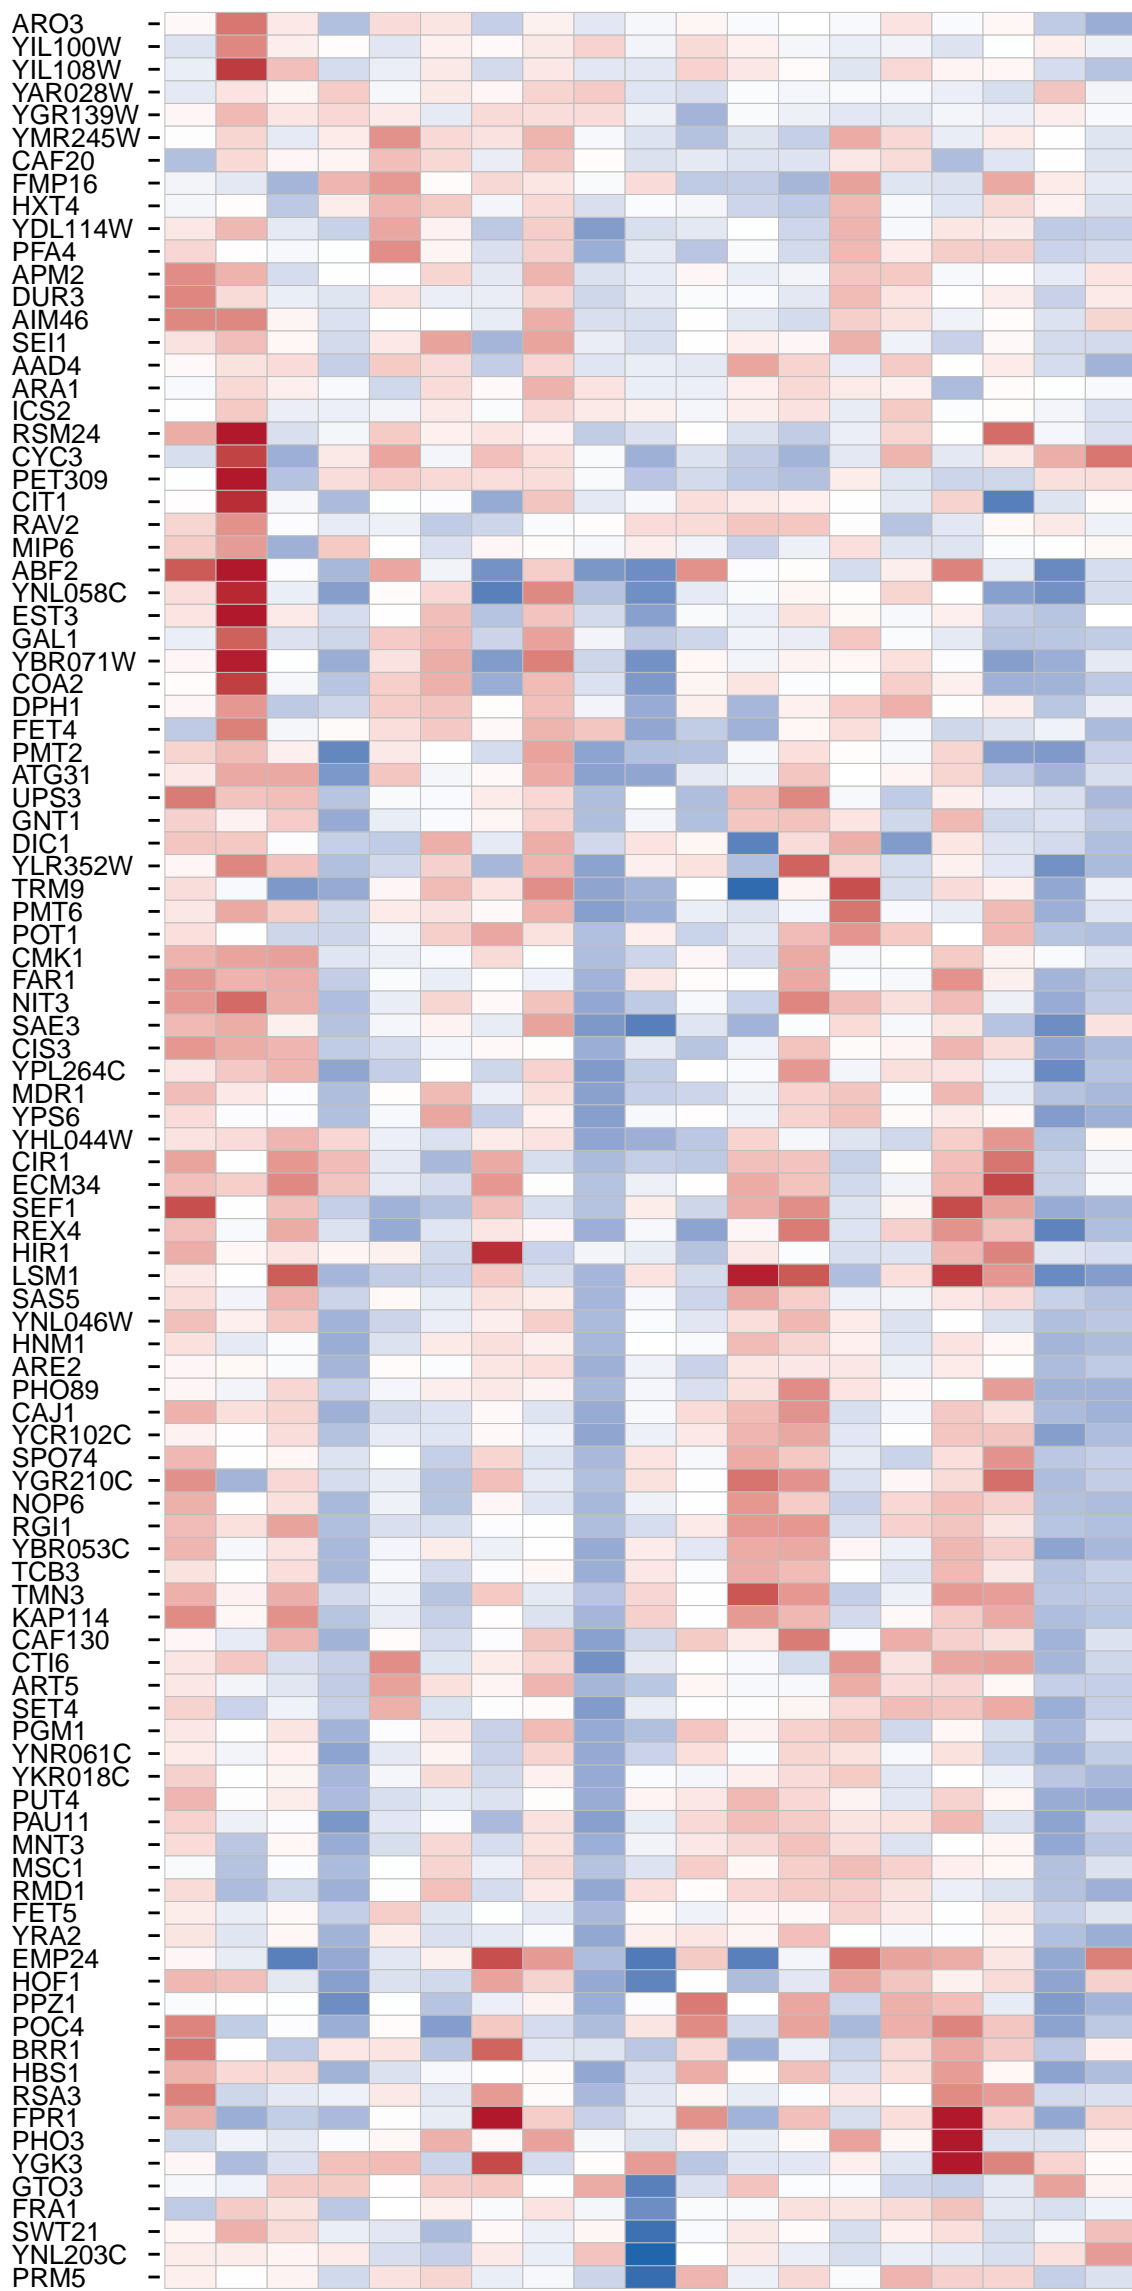

alanine -  
aspartate -  
glutamate -  
phenylalanine -  
glycine -  
histidine -  
isoleucine -  
lysine -  
leucine -  
methionine -  
asparagine -  
proline -  
glutamine -  
arginine -  
serine -  
threonine -  
valine -  
tryptophan -  
tyrosine -

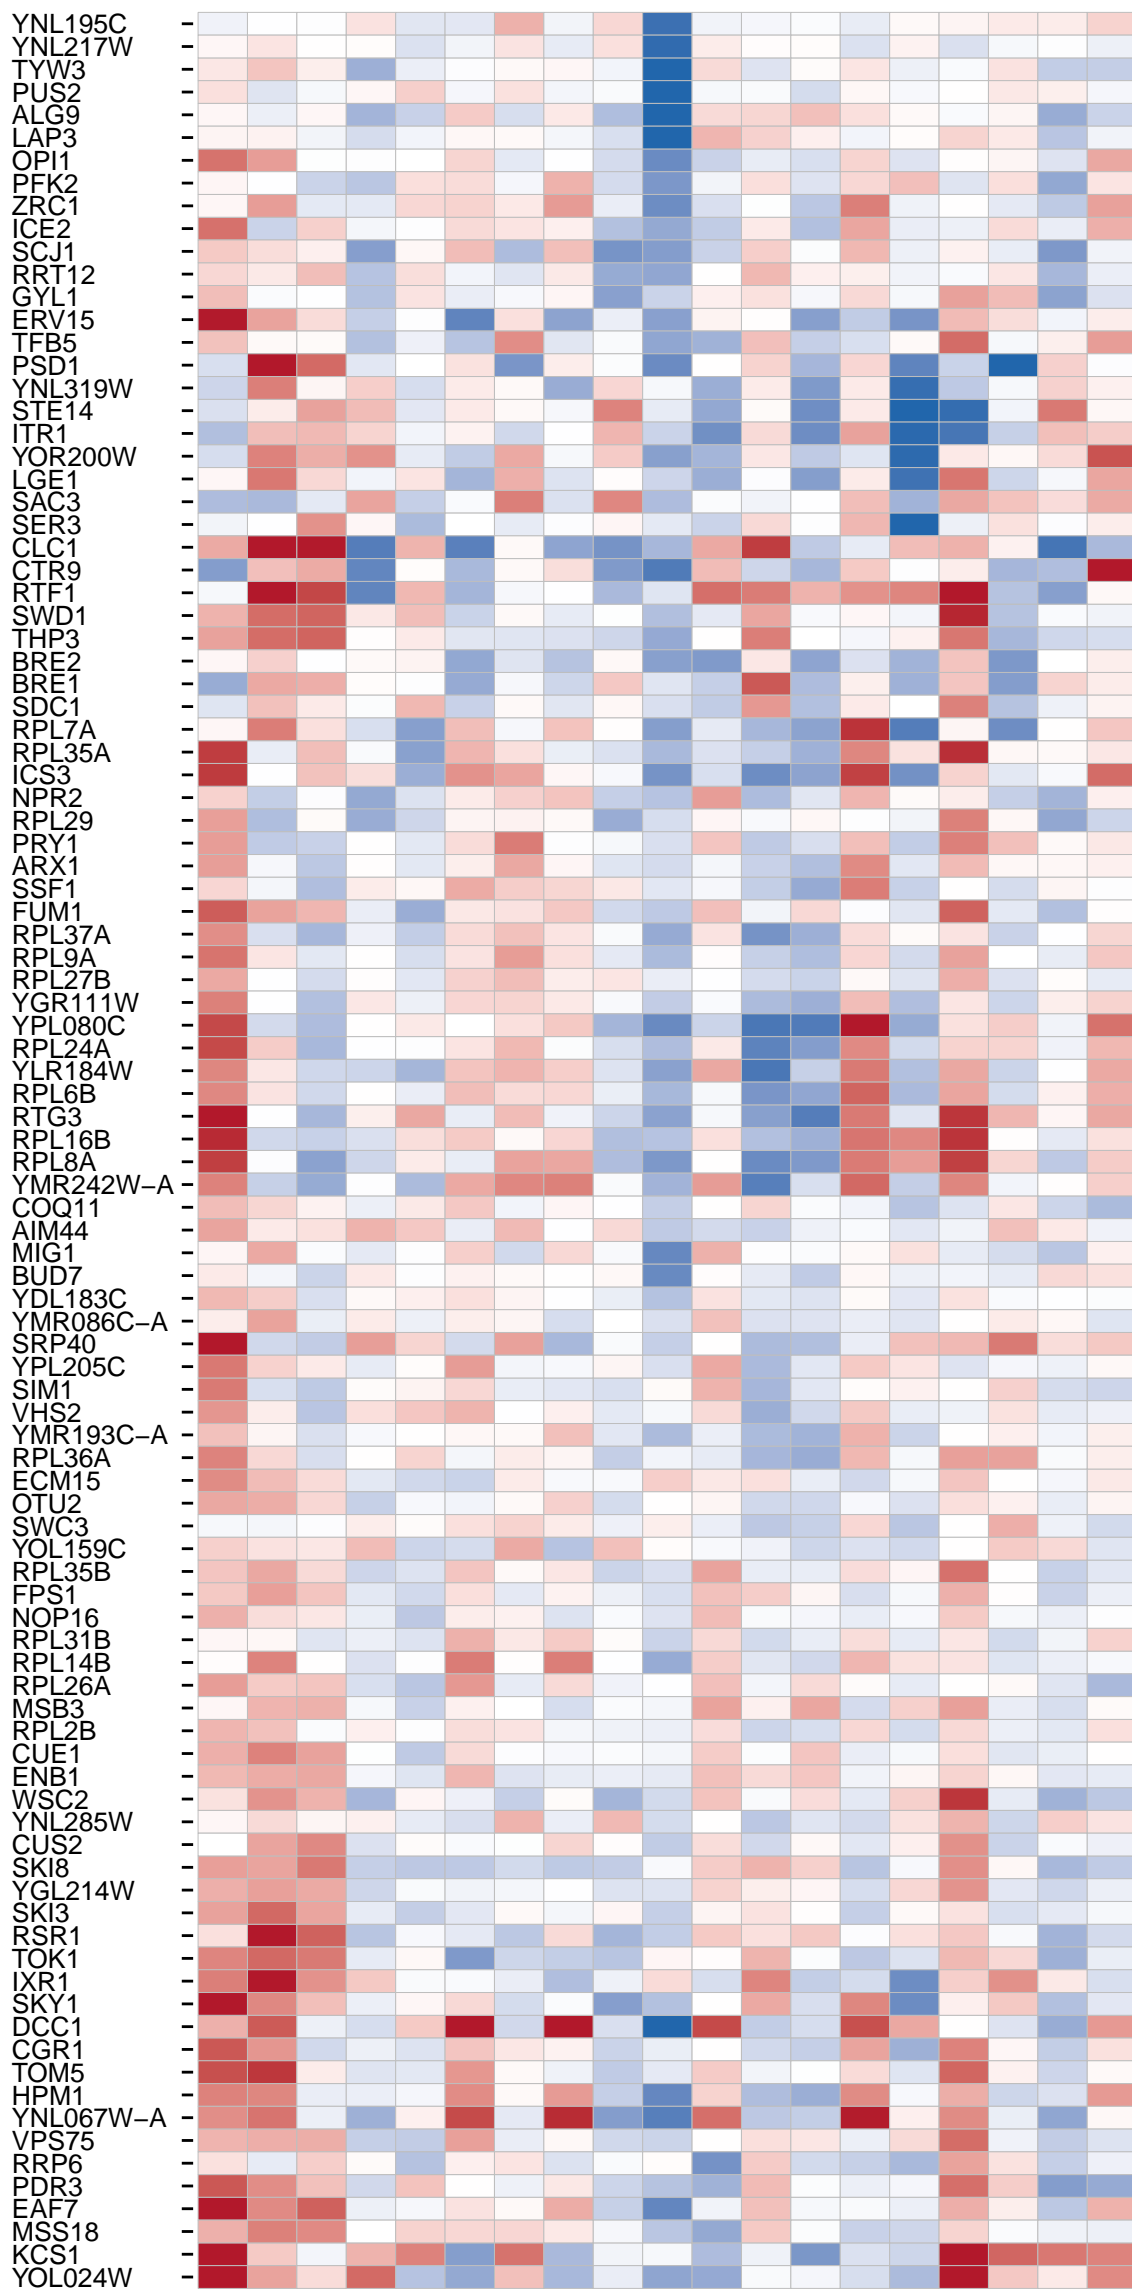

alanine -  
aspartate -  
glutamate -  
phenylalanine -  
glycine -  
histidine -  
isoleucine -  
lysine -  
leucine -  
methionine -  
asparagine -  
proline -  
glutamine -  
arginine -  
serine -  
threonine -  
valine -  
tryptophan -  
tyrosine -



# 280 similarity clusters informative of gene function

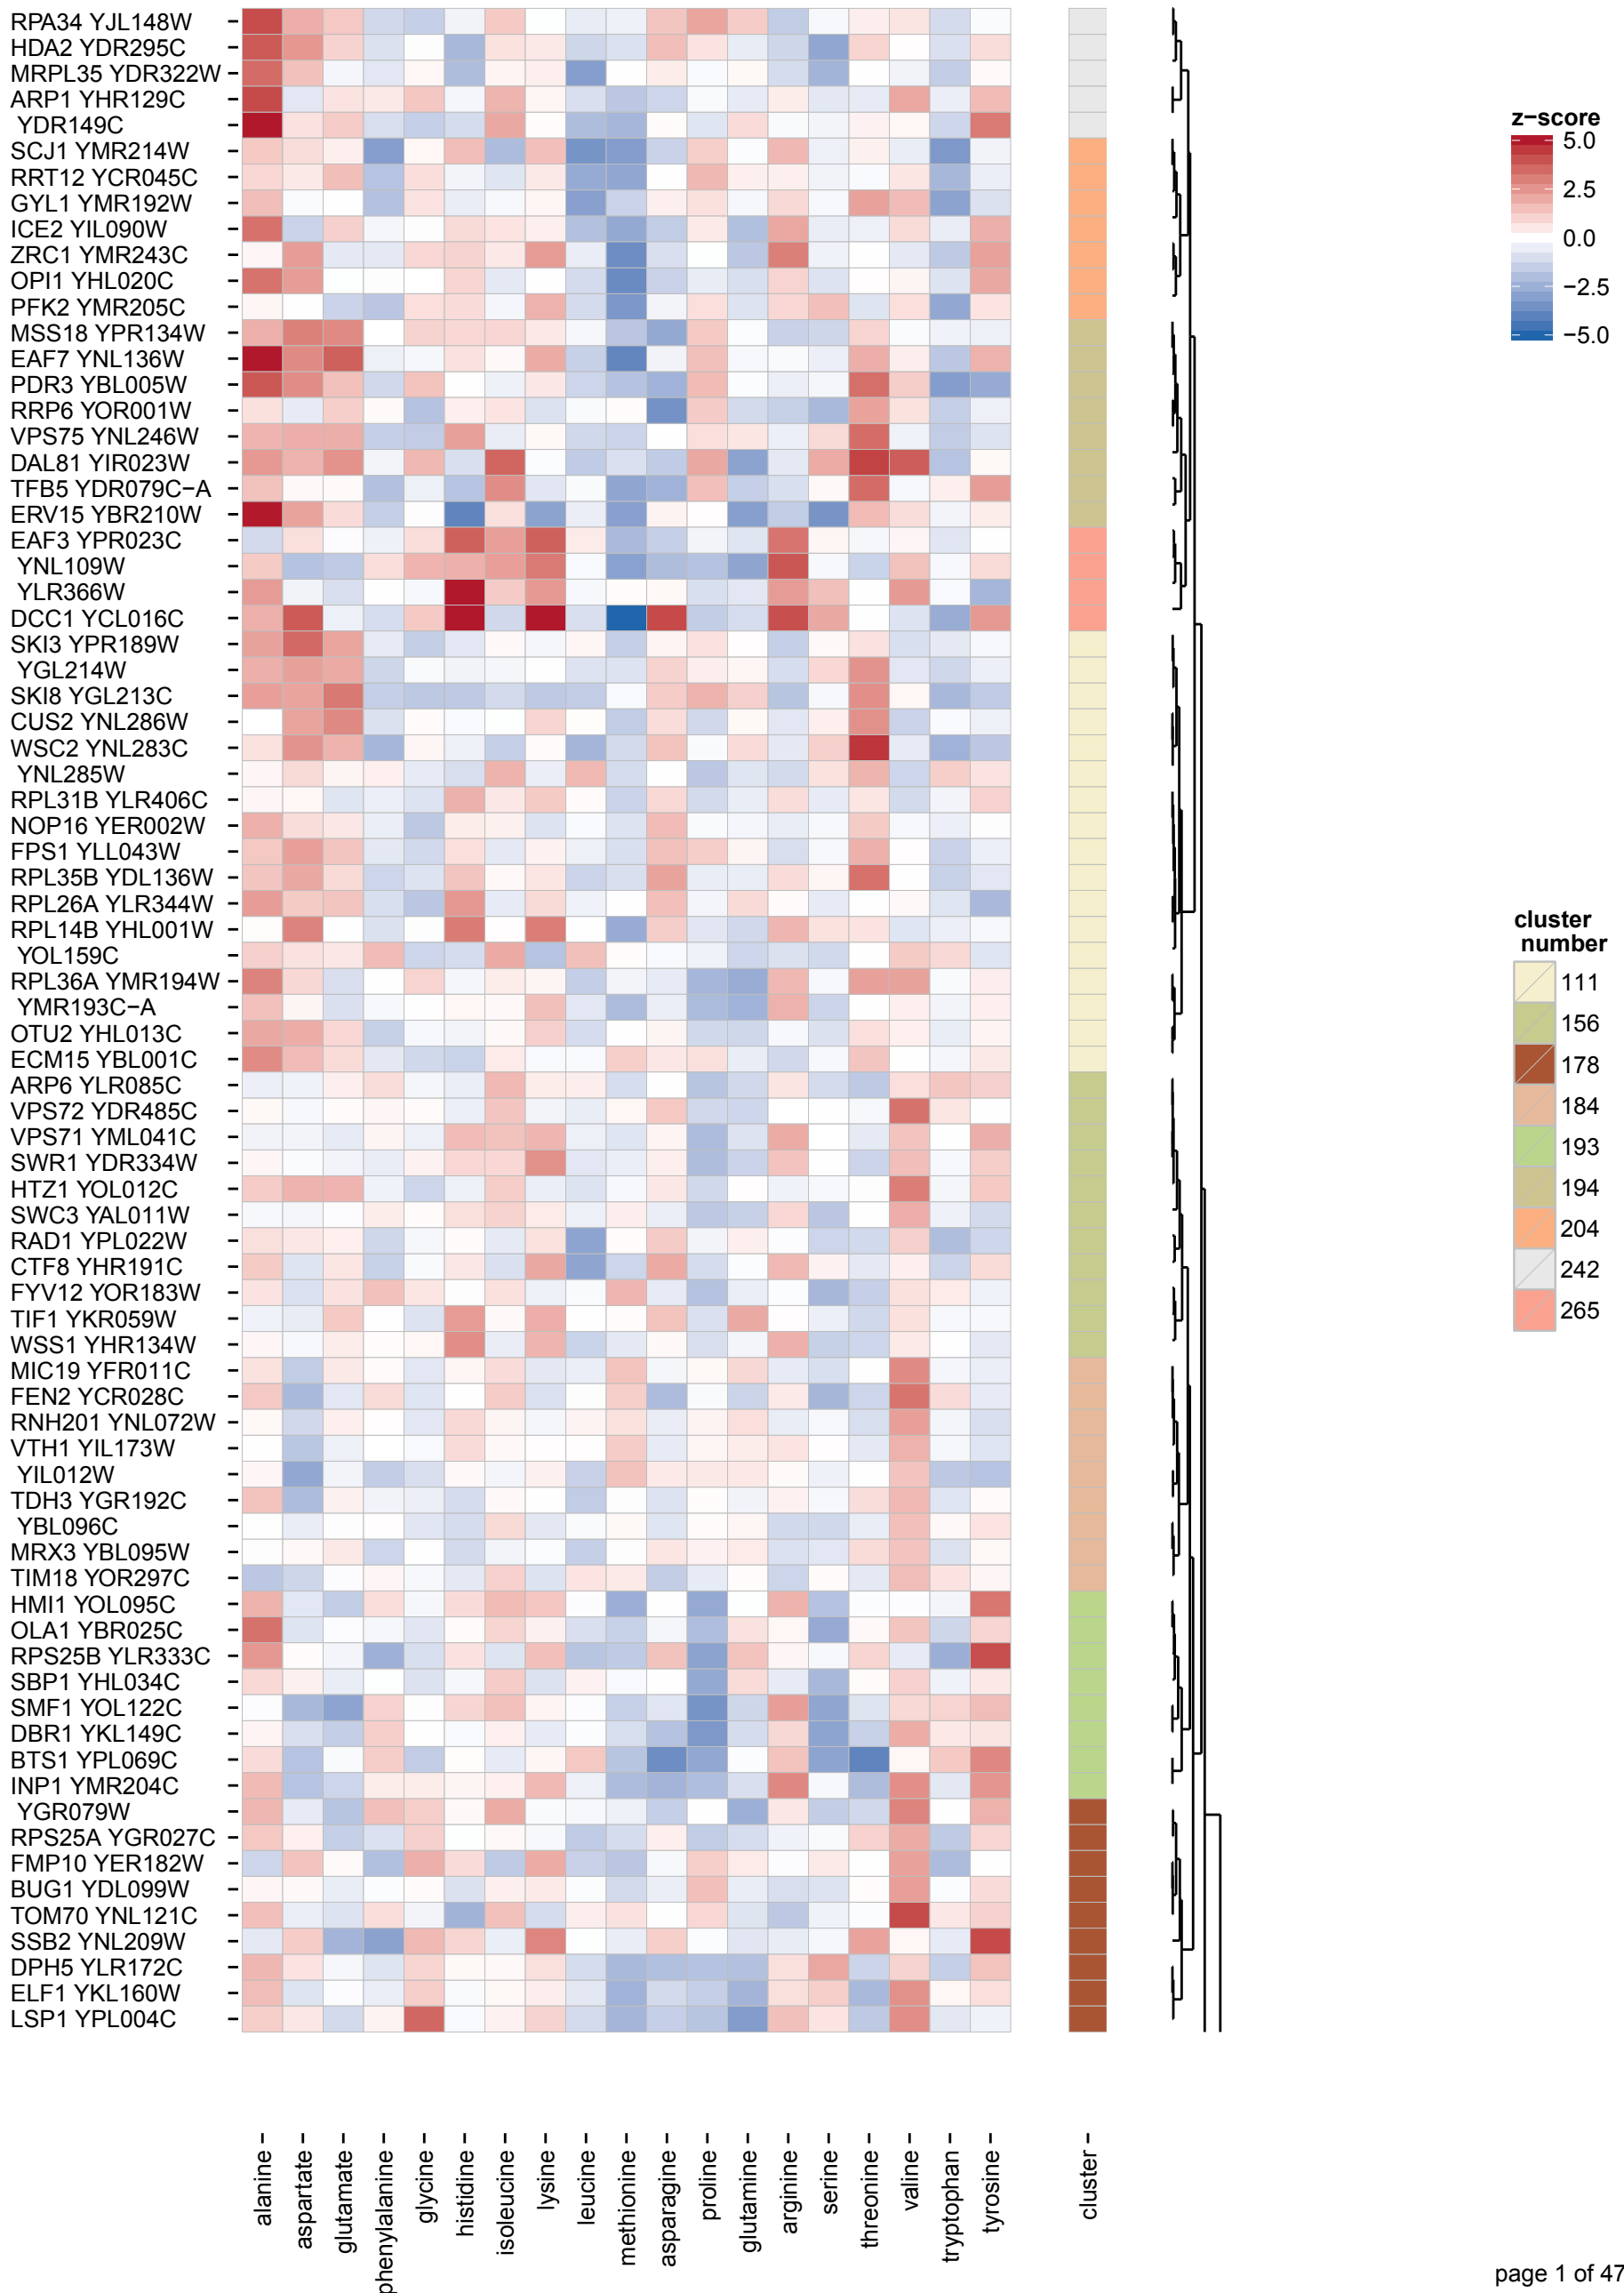

SDC1 YDR469W  
 SWD1 YAR003W  
 THP3 YPR045C  
 BRE2 YLR015W  
 BRE1 YDL074C  
 PSD1 YNL169C  
 RTF1 YGL244W  
 CTR9 YOL145C  
 CLC1 YGR167W  
 LGE1 YPL055C  
 YNL319W  
 YOR200W  
 IXR1 YKL032C  
 PRM5 YIL117C  
 PUS2 YGL063W  
 YNL195C  
 LAP3 YNL239W  
 YNL203C  
 SWT21 YNL187W  
 YNL217W  
 ALG9 YNL219C  
 TYW3 YGL050W  
 BUD7 YOR299W  
 GTO3 YMR251W  
 RPL11B YGR085C  
 NCL1 YBL024W  
 YNL226W  
 REX2 YLR059C  
 BUD28 YLR062C  
 DBP3 YGL078C  
 LRP1 YHR081W  
 RPL37B YDR500C  
 RPP2B YDR382W  
 RPL9B YNL067W  
 RPL36B YPL249C-A  
 RPL31A YDL075W  
 DBP7 YKR024C  
 BUD19 YJL188C  
 YGK3 YOL128C  
 PHO3 YBR092C  
 FPR1 YNL135C  
 RPL6B YLR448W  
 YLR184W  
 RPL24A YGL031C  
 YPL080C  
 RPL16B YNL069C  
 RTG3 YBL103C  
 RPL8A YHL033C  
 YMR242W-A  
 YGR111W  
 RPL27B YDR471W  
 RPL37A YLR185W  
 FUM1 YPL262W  
 RPL9A YGL147C  
 SSF1 YHR066W  
 ARX1 YDR101C  
 YNL067W-A  
 HPM1 YIL110W  
 TOM5 YPR133W-A  
 CGR1 YGL029W  
 ICS3 YJL077C  
 RPL35A YDL191W  
 RPL7A YGL076C  
 RPP1B YDL130W  
 RPL19A YBR084C-A  
 RPL17B YJL177W  
 PRY1 YJL079C  
 RPL29 YFR032C-A  
 NPR2 YEL062W  
 GCV2 YMR189W  
 GCV1 YDR019C  
 ROT2 YBR229C  
 SLX1 YBR228W  
 SIC1 YLR079W  
 PEX8 YGR077C  
 BCH2 YKR027W  
 EAP1 YKL204W  
 PFK1 YGR240C  
 AIM39 YOL053W  
 NPR3 YHL023C  
 HHY1 YEL059W  
 PHO85 YPL031C  
 MDM32 YOR147W  
 COQ6 YGR255C  
 RAD23 YEL037C  
 MSS116 YDR194C  
 TSR3 YOR006C  
 TMA23 YMR269W  
 HSP12 YFL014W  
 YME1 YPR024W  
 YDR524C-B  
 YBR085C-A  
 RTG2 YGL252C  
 MDM10 YAL010C  
 FLX1 YIL134W  
 SPT3 YDR392W  
 MRPS8 YMR158W  
 PIM1 YBL022C  
 MRPS16 YPL013C  
 ATP12 YJL180C

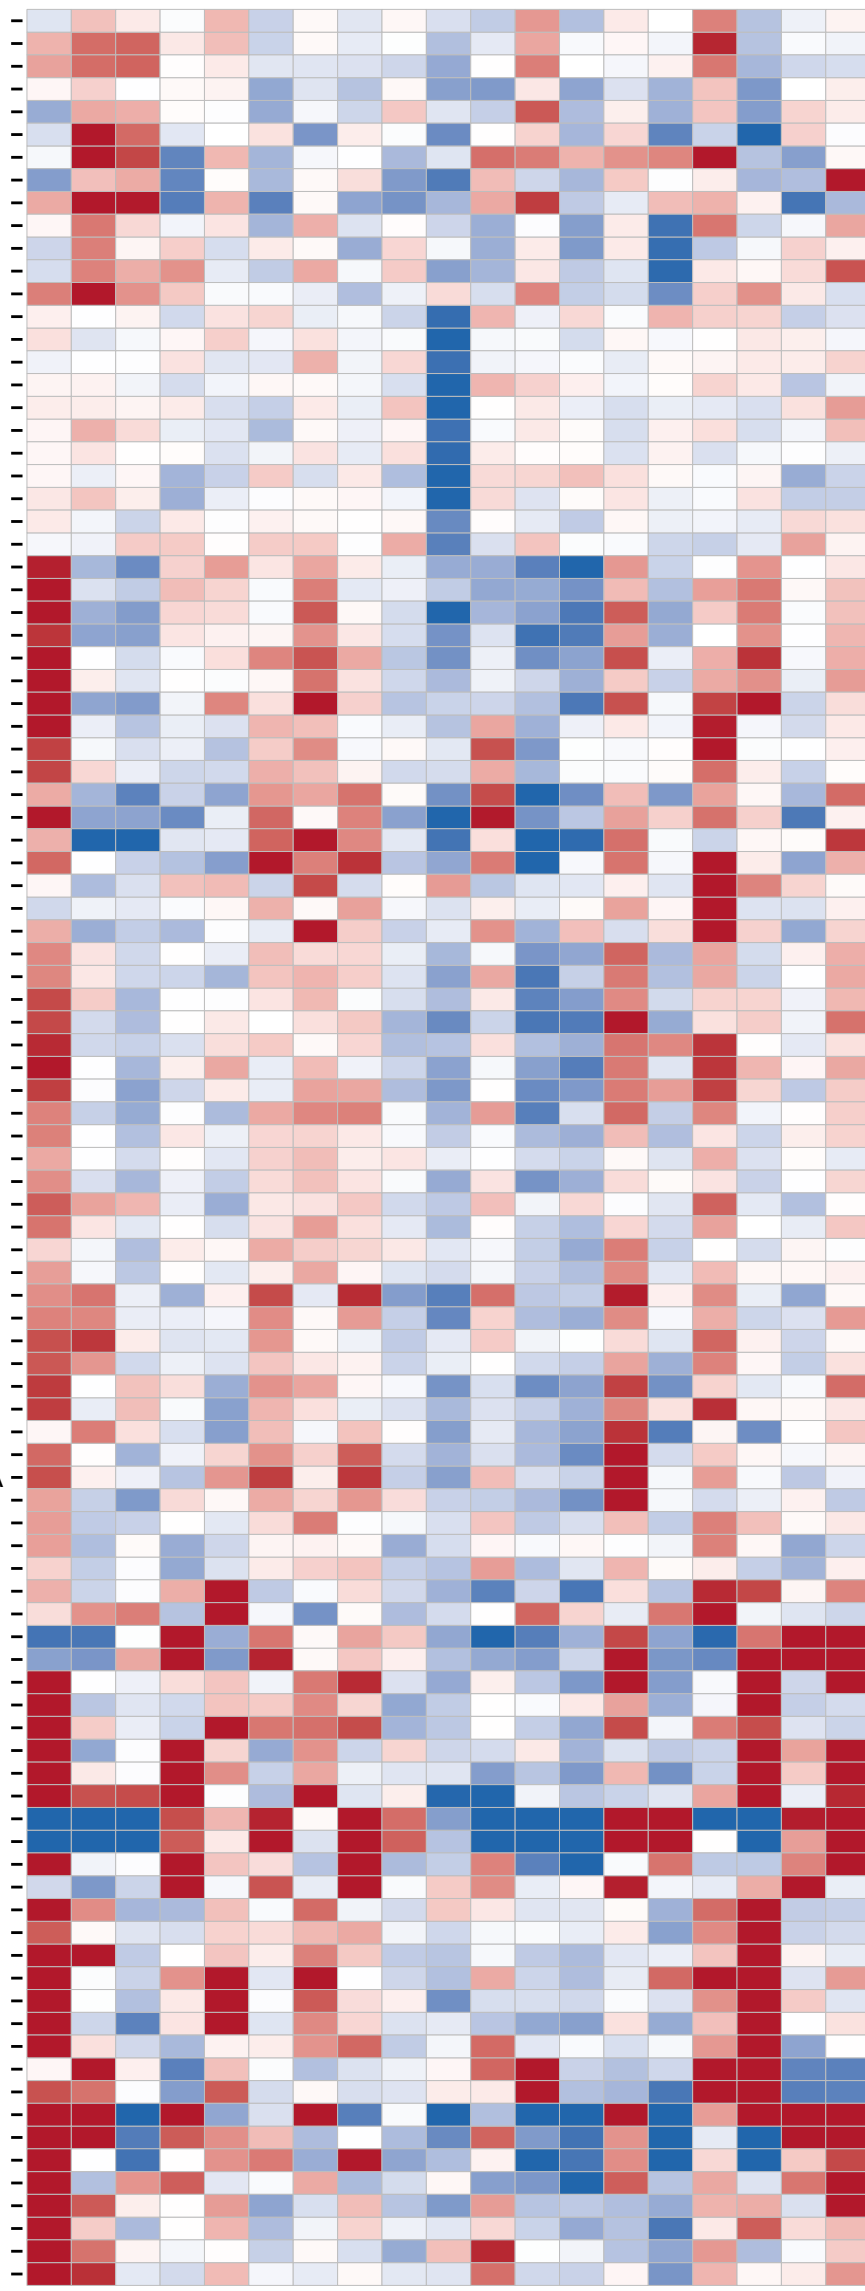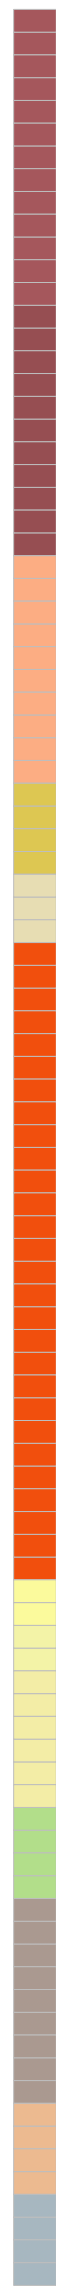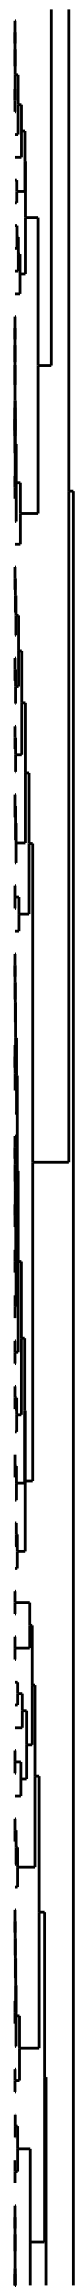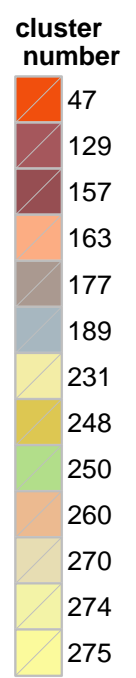

alanine -  
 aspartate -  
 glutamate -  
 phenylalanine -  
 glycine -  
 histidine -  
 isoleucine -  
 lysine -  
 leucine -  
 methionine -  
 asparagine -  
 proline -  
 glutamine -  
 arginine -  
 serine -  
 threonine -  
 valine -  
 tryptophan -  
 tyrosine -  
 cluster -

PCP1 YGR101W  
 IRC19 YLL033W  
 OCT1 YKL134C  
 ATP11 YNL315C  
 RIC1 YLR039C  
 VPS61 YDR136C  
 PEP12 YOR036W  
 VPS35 YJL154C  
 PEP8 YJL053W  
 VPS3 YDR495C  
 VPS63 YLR261C  
 VPS52 YDR484W  
 LST7 YGR057C  
 SLM4 YBR077C  
 LST4 YKL176C  
 MEH1 YKR007W  
 GTR1 YML121W  
 SEH1 YGL100W  
 TCO89 YPL180W  
 OCA1 YNL099C  
 HTD2 YHR067W  
 PDA1 YER178W  
 PDX1 YGR193C  
 YBR221W-A  
 LAT1 YNL071W  
 LIP2 YLR239C  
 LPD1 YFL018C  
 AIM22 YJL046W  
 CEM1 YER061C  
 GCV3 YAL044C  
 TAF14 YPL129W  
 MTM1 YGR257C  
 MDJ1 YFL016C  
 HFA1 YMR207C  
 MPC2 YHR162W  
 MRPL51 YPR100W  
 ADH3 YMR083W  
 AIM1 YAL046C  
 PTC6 YCR079W  
 GSH2 YOL049W  
 NFU1 YKL040C  
 UBA3 YPR066W  
 PEP4 YPL154C  
 ERV29 YGR284C  
 TMA108 YIL137C  
 ASN2 YGR124W  
 SPC2 YML055W  
 ASN1 YPR145W  
 PRB1 YEL060C  
 TEA1 YOR337W  
 YOL037C  
 HAP2 YGL237C  
 HAP5 YOR358W  
 URE2 YNL229C  
 CSR2 YPR030W  
 ASF1 YJL115W  
 SSN8 YNL025C  
 YLR358C  
 MRPL25 YGR076C  
 SIT4 YDL047W  
 YFL041W-A  
 MCH1 YDL054C  
 ARO8 YGL202W  
 RNR1 YER070W  
 YDR115W  
 RNR4 YGR180C  
 MDM34 YGL219C  
 YGL218W  
 PTC1 YDL006W  
 XRN1 YGL173C  
 BNA4 YBL098W  
 UGO1 YDR470C  
 DHH1 YDL160C  
 NUM1 YDR150W  
 TIF4631 YGR162W  
 RAI1 YGL246C  
 GEP4 YHR100C  
 GIM3 YNL153C  
 PAC10 YGR078C  
 YPQ1 YOL092W  
 RPP1A YDL081C  
 DIA2 YOR080W  
 RPL13B YMR142C  
 SAM1 YLR180W  
 SAM2 YDR502C  
 SFA1 YDL168W  
 CMR1 YDL156W  
 ARG7 YMR062C  
 SFP1 YLR403W  
 DEF1 YKL054C  
 PRE9 YGR135W  
 UMP1 YBR173C  
 HSL7 YBR133C  
 SHP1 YBL058W  
 ECM31 YBR176W  
 RPL21A YBR191W  
 PEP7 YDR323C  
 IPK1 YDR315C  
 YGL041C-B  
 VIP1 YLR410W

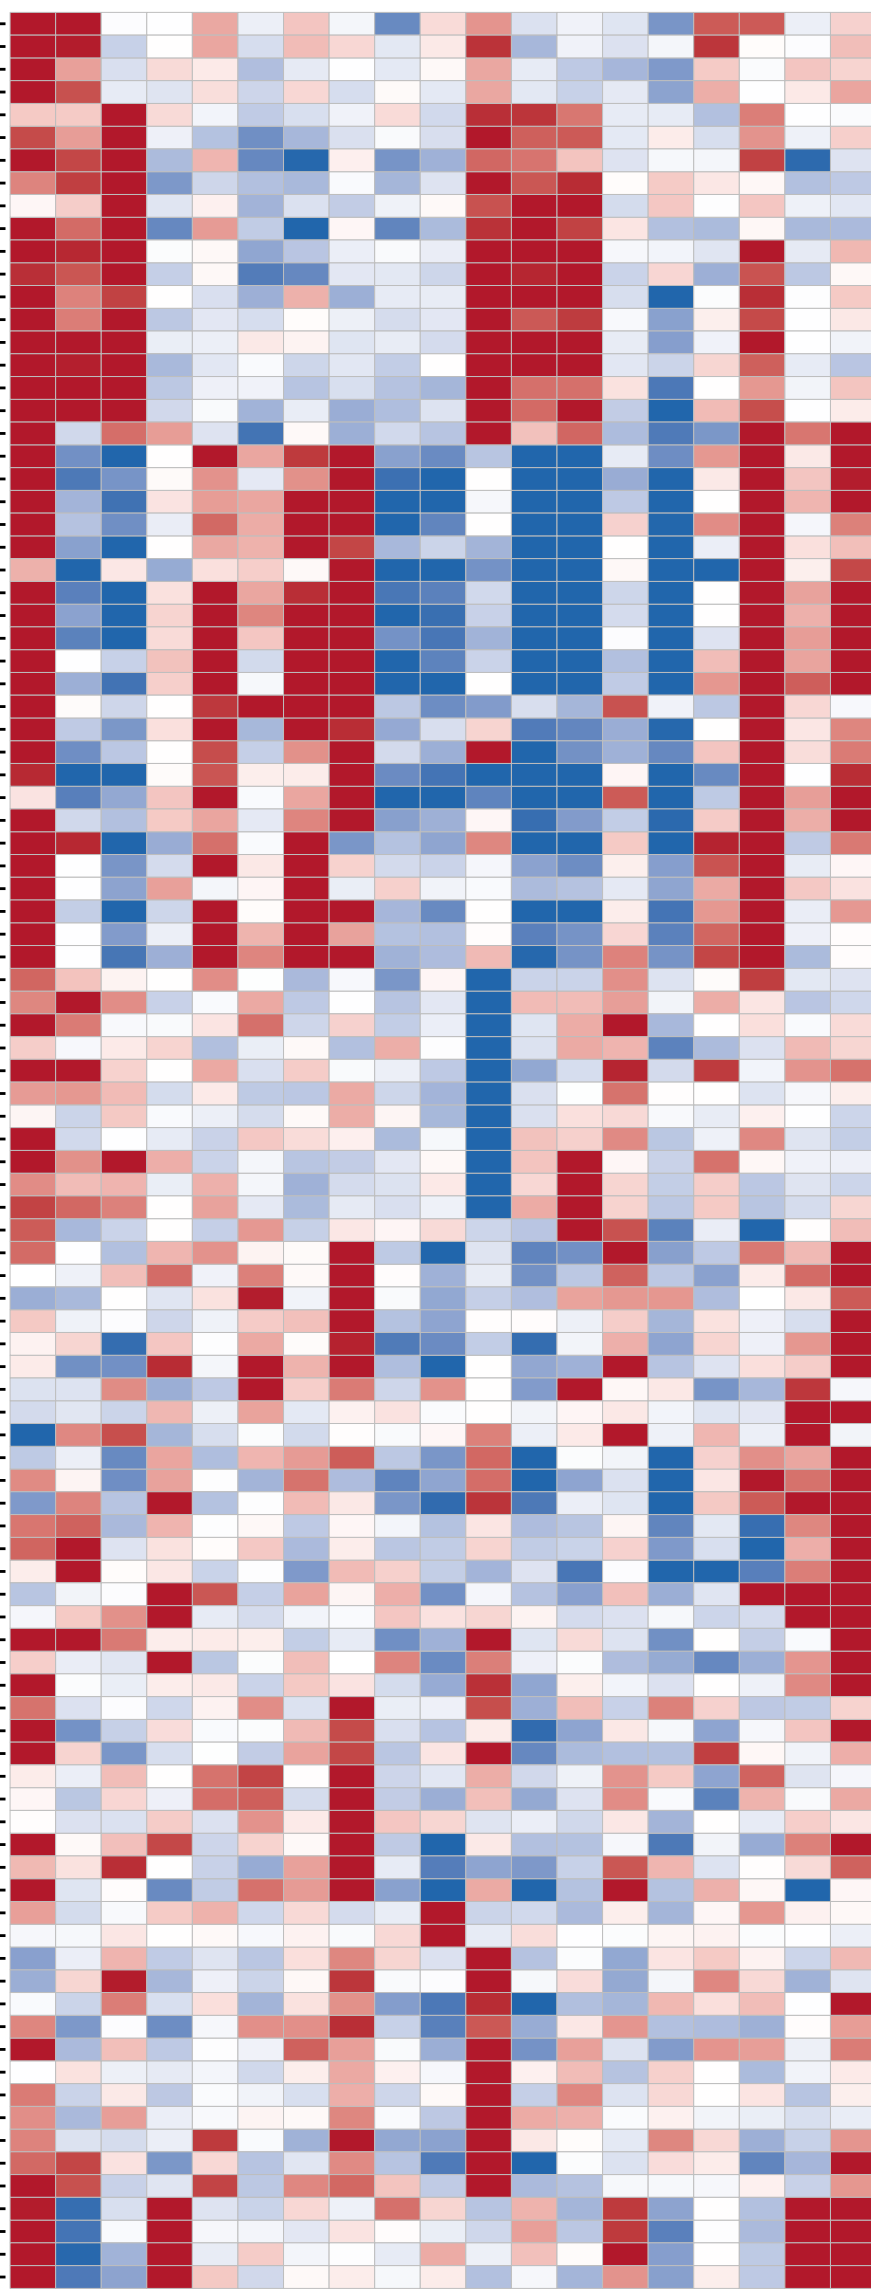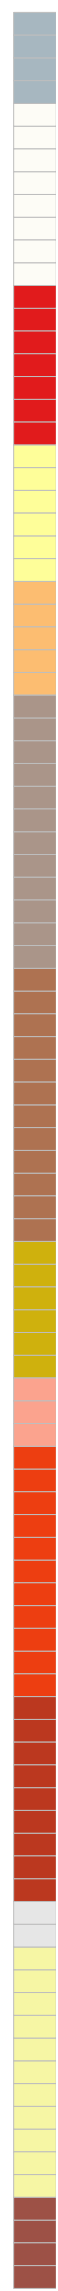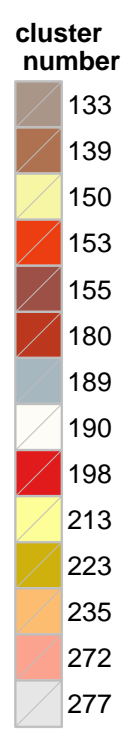

alanine -  
 aspartate -  
 glutamate -  
 phenylalanine -  
 glycine -  
 histidine -  
 isoleucine -  
 lysine -  
 leucine -  
 methionine -  
 asparagine -  
 proline -  
 glutamine -  
 arginine -  
 serine -  
 threonine -  
 valine -  
 tryptophan -  
 tyrosine -  
 cluster -

PRS3 YHL011C  
 SWA2 YDR320C  
 POR2 YIL114C  
 PFK26 YIL107C  
 HUR1 YGL168W  
 PMR1 YGL167C  
 MAP1 YLR244C  
 TRM44 YPL030W  
 ILV6 YCL009C  
 LEU3 YLR451W  
 MRPS5 YBR251W  
 SKP2 YNL311C  
 TPN1 YGL186C  
 OAC1 YKL120W  
 YDJ1 YNL064C  
 HEM25 YDL119C  
 YDL118W  
 YLR282C  
 YJR111C  
 RSC1 YGR056W  
 NPL3 YDR432W  
 YPL062W  
 ALD6 YPL061W  
 GET1 YGL020C  
 IES6 YEL044W  
 GRR1 YJR090C  
 SSZ1 YHR064C  
 IMG1 YCR046C  
 YGR064W  
 RTC1 YOL138C  
 YCR075W-A  
 ERJ5 YFR041C  
 PIB2 YGL023C  
 ATG36 YJL185C  
 SEA4 YBL104C  
 USV1 YPL230W  
 HTL1 YCR020W-B  
 YPL229W  
 SNX4 YJL036W  
 MTC5 YDR128W  
 YOR309C  
 MUD2 YKL074C  
 ADA2 YDR448W  
 MRP4 YHL004W  
 ADH5 YBR145W  
 ATP7 YKL016C  
 MIR1 YJR077C  
 MSN5 YDR335W  
 FYV5 YCL058C  
 HDA3 YPR179C  
 KAP123 YER110C  
 BRO1 YPL084W  
 EMI1 YDR512C  
 YGL188C-A  
 RPS8A YBL072C  
 SWI6 YLR182W  
 RPL34B YIL052C  
 GET2 YER083C  
 BUD25 YER014C-A  
 RPL12B YDR418W  
 YBL071C-B  
 ASC1 YMR116C  
 VPS17 YOR132W  
 TEF4 YKL081W  
 VPS41 YDR080W  
 CCZ1 YBR131W  
 MON1 YGL124C  
 VPS5 YOR069W  
 OPT2 YPR194C  
 MCH5 YOR306C  
 VAM3 YOR106W  
 YPT7 YML001W  
 VAM7 YGL212W  
 TOP1 YOL006C  
 NPR1 YNL183C  
 GLN3 YER040W  
 REF2 YDR195W  
 RBS1 YDL189W  
 AVT1 YJR001W  
 HUL4 YJR036C  
 ADK1 YDR226W  
 SRB8 YCR081W  
 DEG1 YFL001W  
 REG1 YDR028C  
 RAD51 YER095W  
 DOT6 YER088C  
 TOP3 YLR234W  
 STE23 YLR389C  
 GAT2 YMR136W  
 TRM7 YBR061C  
 ALT1 YLR089C  
 PHO2 YDL106C  
 ELP6 YMR312W  
 KTI11 YBL071W-A  
 COA4 YLR218C  
 BUD30 YDL151C  
 ADE17 YMR120C  
 FSF1 YOR271C  
 LEU4 YNL104C  
 RAD33 YML011C

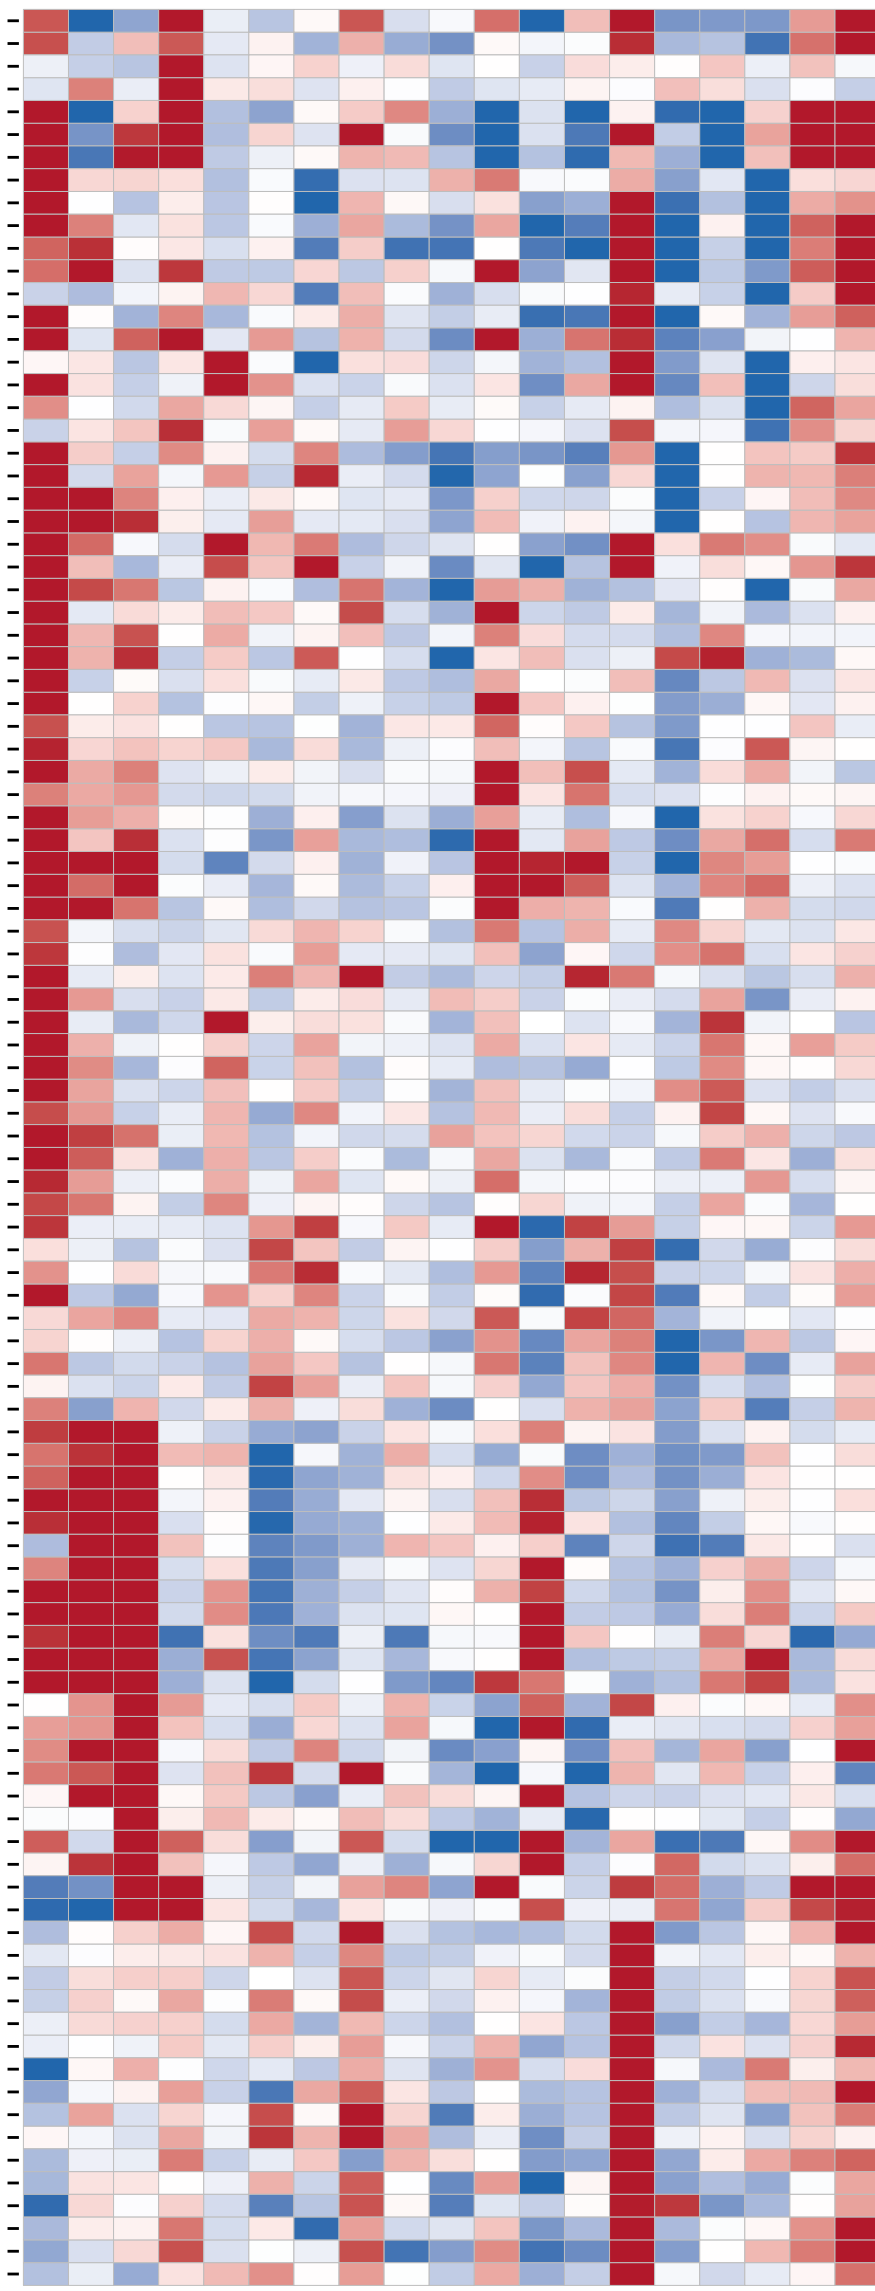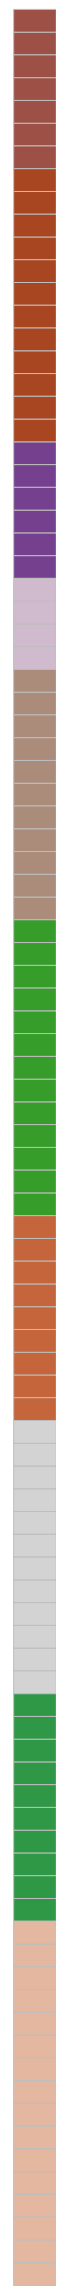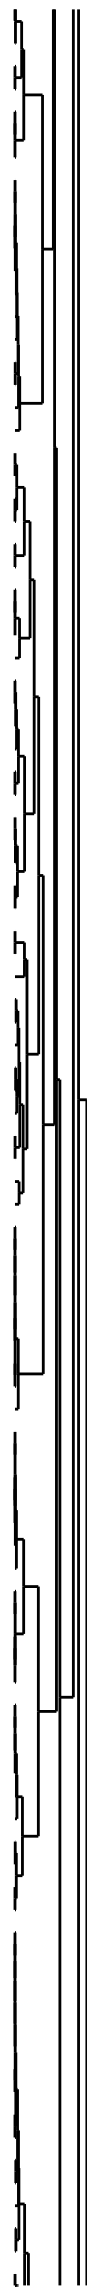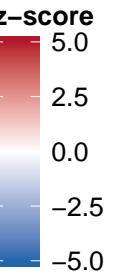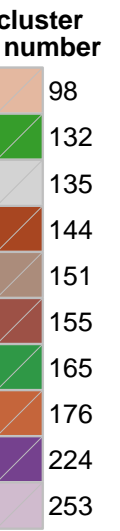

alanine -  
 aspartate -  
 glutamate -  
 phenylalanine -  
 glycine -  
 histidine -  
 isoleucine -  
 lysine -  
 leucine -  
 methionine -  
 asparagine -  
 proline -  
 glutamine -  
 arginine -  
 serine -  
 threonine -  
 valine -  
 tryptophan -  
 tyrosine -  
 cluster -

YLR365W  
 UBP3 YER151C  
 CSE2 YNR010W  
 ACO2 YJL200C  
 LYS14 YDR034C  
 LYS20 YDL182W  
 SWI5 YDR146C  
 MXR2 YCL033C  
 BCS1 YDR375C  
 COX23 YHR116W  
 GUF1 YLR289W  
 GCN3 YKR026C  
 SSK1 YLR006C  
 CLG1 YGL215W  
 MNN2 YBR015C  
 TRM10 YOL093W  
 FUR4 YBR021W  
 YLR334C  
 YIL002W-A  
 CGI121 YML036W  
 CSM3 YMR048W  
 YNL120C  
 NCS2 YNL119W  
 PAM17 YKR065C  
 UIP5 YKR044W  
 BEM4 YPL161C  
 URM1 YIL008W  
 NCS6 YGL211W  
 GAP1 YKR039W  
 ELP3 YPL086C  
 IKI1 YHR187W  
 YHM2 YMR241W  
 TRM1 YDR120C  
 ARG81 YML099C  
 YPQ2 YDR352W  
 YML099W-A  
 ARG80 YMR042W  
 YGR018C  
 LYS21 YDL131W  
 PML39 YML107C  
 LOS1 YKL205W  
 ARC1 YGL105W  
 BUD27 YFL023W  
 RIT1 YMR283C  
 ELP2 YGR200C  
 SCH9 YHR205W  
 AIM29 YKR074W  
 YBL053W  
 SAP155 YFR040W  
 CIN2 YPL241C  
 YOR376W  
 RAD6 YGL058W  
 GDH1 YOR375C  
 SER3 YER081W  
 SAC3 YDR159W  
 YOR283W  
 CTP1 YBR291C  
 TPS2 YDR074W  
 YNL296W  
 YML009W-B  
 TSA1 YML028W  
 TAL1 YLR354C  
 MET2 YNL277W  
 GPP1 YIL053W  
 MCK1 YNL307C  
 AFT1 YGL071W  
 SNF4 YGL115W  
 SPF1 YEL031W  
 YHI9 YHR029C  
 RTK1 YDL025C  
 GRX6 YDL010W  
 YDL009C  
 YHR022C  
 IML3 YBR107C  
 RAD7 YJR052W  
 RAD26 YJR035W  
 CBF1 YJR060W  
 OST3 YOR085W  
 HCH1 YNL281W  
 YBR116C  
 MUD1 YBR119W  
 RTT109 YLL002W  
 CHA4 YLR098C  
 SPT2 YER161C  
 RPL34A YER056C-A  
 RPS24A YER074W  
 APS1 YLR170C  
 YLR169W  
 RPS26B YER131W  
 YKL063C  
 SCS7 YMR272C  
 SIZ1 YDR409W  
 ROY1 YMR258C  
 HKR1 YDR420W  
 GLG2 YJL137C  
 FUN14 YAL008W  
 EFT2 YDR385W  
 SPO7 YAL009W  
 OSM1 YJR051W  
 UTR1 YJR049C

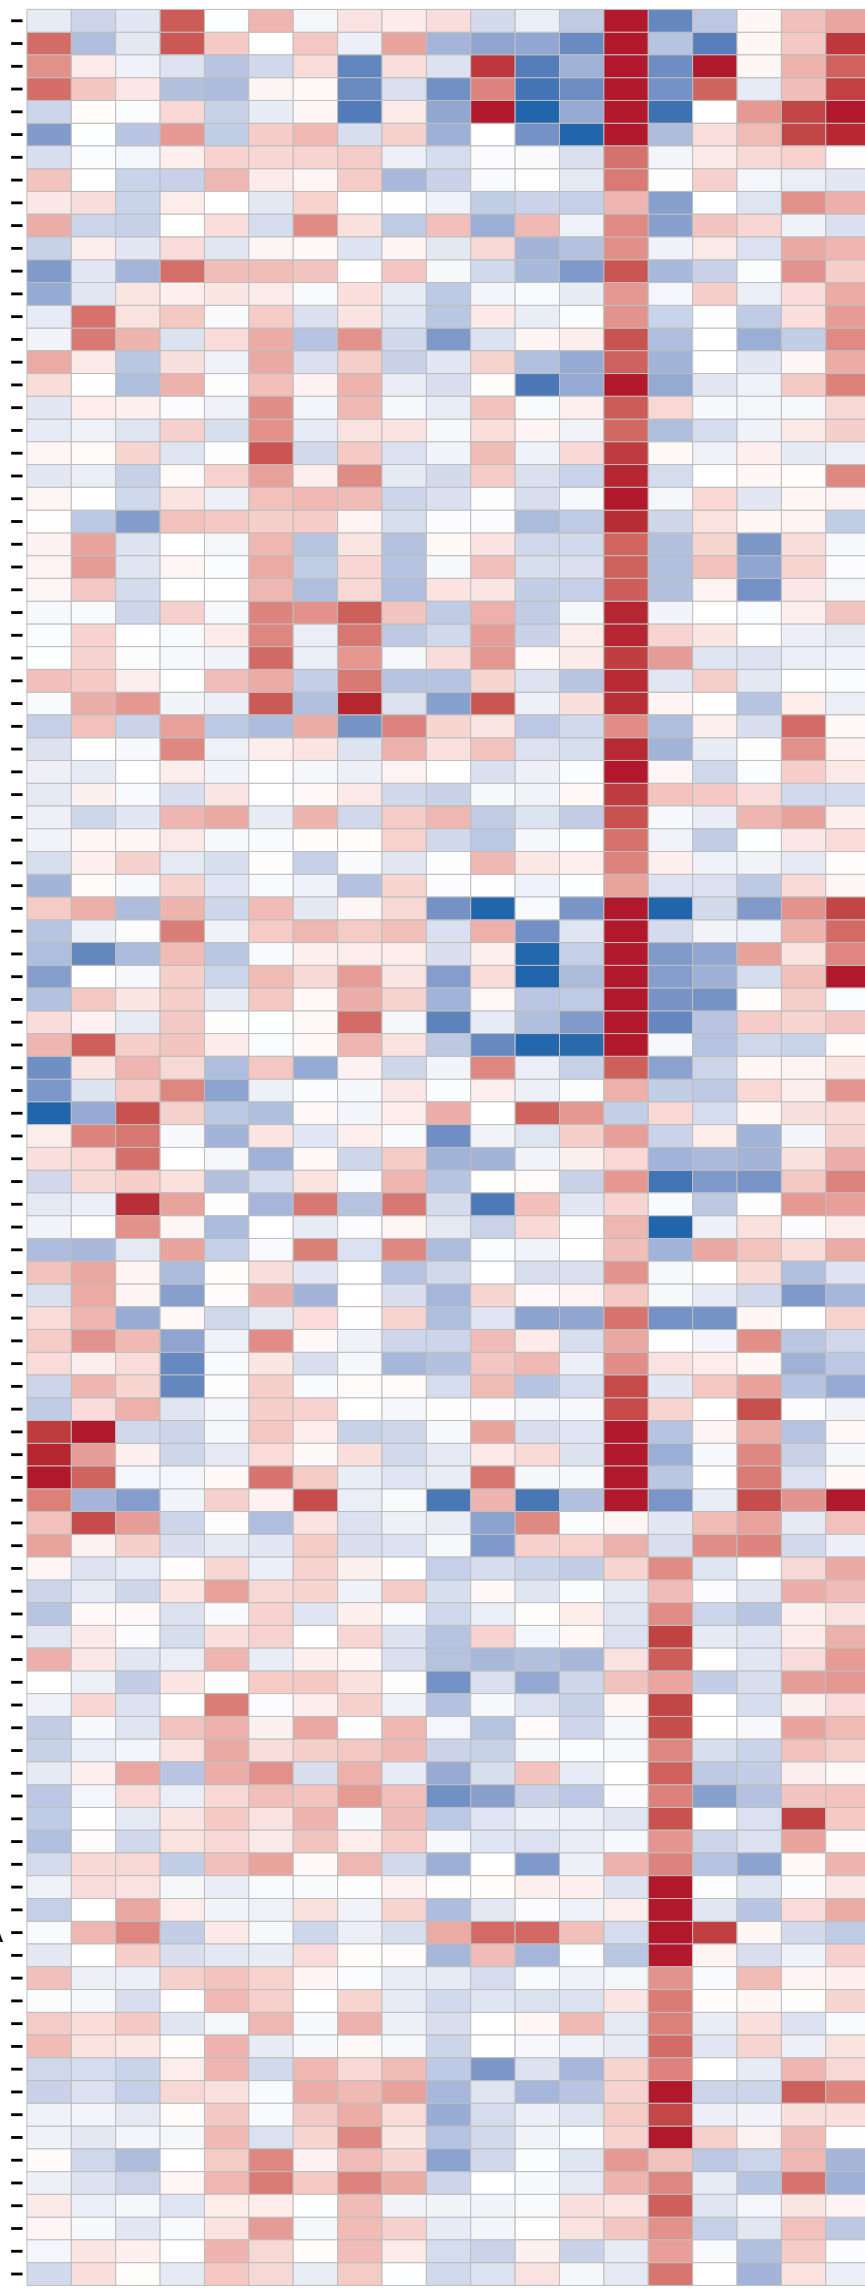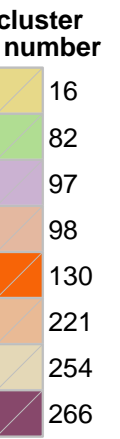

alanine -  
 aspartate -  
 glutamate -  
 phenylalanine -  
 glycine -  
 histidine -  
 isoleucine -  
 lysine -  
 leucine -  
 methionine -  
 asparagine -  
 proline -  
 glutamine -  
 arginine -  
 serine -  
 threonine -  
 valine -  
 tryptophan -  
 tyrosine -  
 cluster -

IBD2 YNL164C  
 PCL1 YNL289W  
 RAD54 YGL163C  
 SNF11 YDR073W  
 NSG2 YNL156C  
 ECL1 YGR146C  
 SKO1 YNL167C  
 FLC1 YPL221W  
 PEX25 YPL112C  
 GAL11 YOL051W  
 CUE3 YGL110C  
 YRR1 YOR162C  
 SNF2 YOR290C  
 SNF5 YBR289W  
 SNF6 YHL025W  
 VPS73 YGL104C  
 YDR514C  
 OPI9 YLR338W  
 YBR182C-A  
 RPA12 YJR063W  
 ISY1 YJR050W  
 YML020W  
 BNI5 YNL166C  
 YNL165W  
 YLR152C  
 YJR107W  
 SRL3 YKR091W  
 YLR173W  
 YLR149C  
 LCL2 YLR104W  
 NYV1 YLR093C  
 KDX1 YKL161C  
 YLL054C  
 TRF5 YNL299W  
 PPS1 YBR276C  
 UPS2 YLR168C  
 DCK1 YLR422W  
 SSU1 YPL092W  
 YBR174C  
 MSH6 YDR097C  
 CLB2 YPR119W  
 RPL43A YPR043W  
 PEX5 YDR244W  
 PEX19 YDL065C  
 PEX10 YDR265W  
 PEX14 YGL153W  
 PEX4 YGR133W  
 PEX2 YJL210W  
 PEX1 YKL197C  
 PEX13 YLR191W  
 PEX6 YNL329C  
 YJL211C  
 PEX22 YAL055W  
 PEX12 YMR026C  
 HOC1 YJR075W  
 PEX3 YDR329C  
 BUB3 YOR026W  
 YGL152C  
 SUS1 YBR111W-A  
 VPS28 YPL065W  
 DID4 YKL002W  
 VPS24 YKL041W  
 DOA4 YDR069C  
 OPI8 YKR035C  
 YNR005C  
 VPS27 YNR006W  
 DOA1 YKL213C  
 DCV1 YFR012W  
 VPS25 YJR102C  
 STP22 YCL008C  
 DID2 YKR035W-A  
 VPS60 YDR486C  
 SRN2 YLR119W  
 VPS20 YMR077C  
 SNF7 YLR025W  
 SNF8 YPL002C  
 ZDS2 YML109W  
 CAP2 YIL034C  
 YIL032C  
 GBP2 YCL011C  
 SLH1 YGR271W  
 PGD1 YGL025C  
 YMR001C-A  
 YBP1 YBR216C  
 DCR2 YLR361C  
 BUL2 YML111W  
 HSL1 YKL101W  
 ECM33 YBR078W  
 YBT1 YLL048C  
 YMR306C-A  
 SKM1 YOL113W  
 STR2 YJR130C  
 YGR069W  
 SYH1 YPL105C  
 ABM1 YJR108W  
 PEX7 YDR142C  
 SIA1 YOR137C  
 MNN11 YJL183W  
 YBR134W  
 VPS30 YPL120W

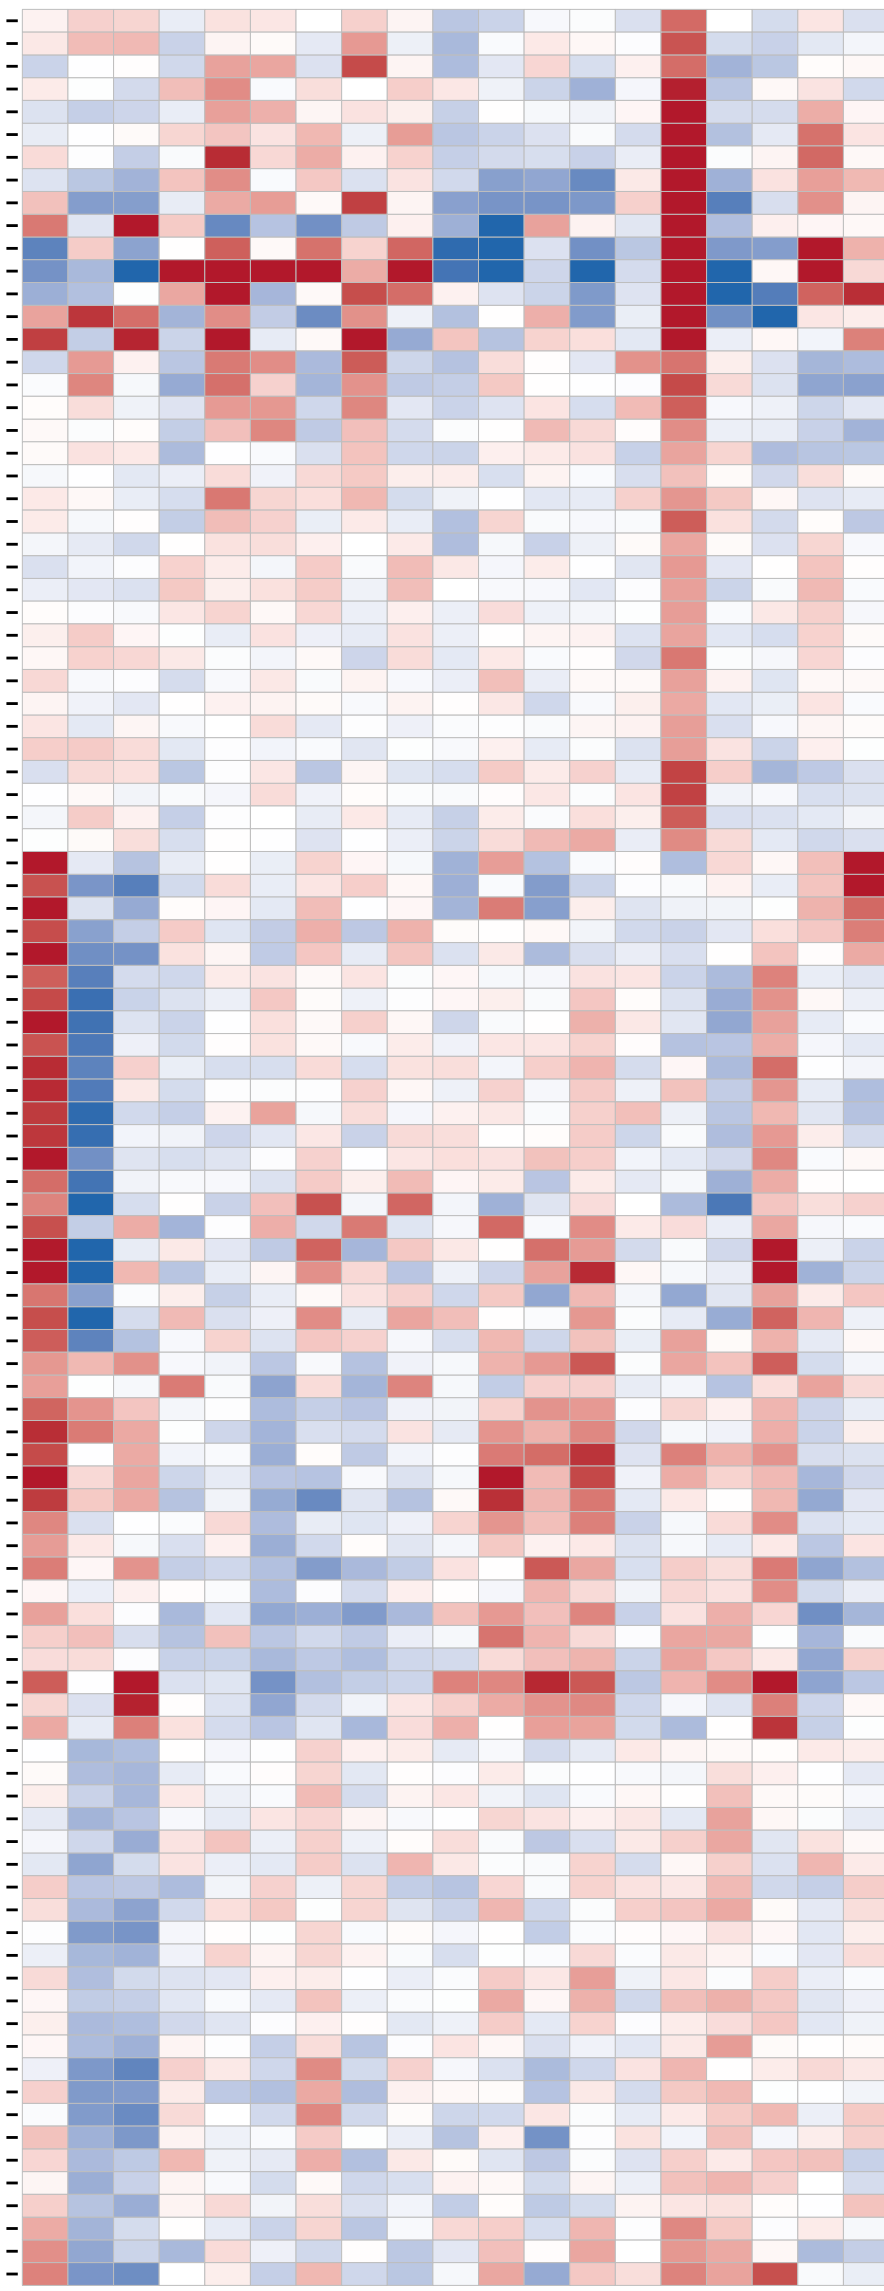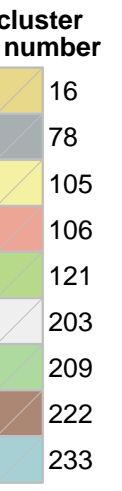

alanine -  
 aspartate -  
 glutamate -  
 phenylalanine -  
 glycine -  
 histidine -  
 isoleucine -  
 lysine -  
 leucine -  
 methionine -  
 asparagine -  
 proline -  
 glutamine -  
 arginine -  
 serine -  
 threonine -  
 valine -  
 tryptophan -  
 tyrosine -  
 cluster -

VPS38 YLR360W  
 VAC7 YNL054W  
 DDP1 YOR163W  
 COQ1 YBR003W  
 GZF3 YJL110C  
 PAL1 YDR348C  
 MSB4 YOL112W  
 YPR1 YDR368W  
 YGR182C  
 SAP4 YGL229C  
 YNL324W  
 ADR1 YDR216W  
 MRP10 YDL045W-A  
 MAL32 YBR299W  
 YUH1 YJR099W  
 VBA5 YKR105C  
 ATG18 YFR021W  
 IME4 YGL192W  
 SSD1 YDR293C  
 BEM2 YER155C  
 VAC14 YLR386W  
 FAB1 YFR019W  
 RPL20B YOR312C  
 WHI3 YNL197C  
 CDC10 YCR002C  
 YPK9 YOR291W  
 EOS1 YNL080C  
 NVJ1 YHR195W  
 YGR125W  
 YIL058W  
 GPM2 YDL021W  
 HOT1 YMR172W  
 LDB16 YCL005W  
 REV1 YOR346W  
 DSE4 YNR067C  
 RDI1 YDL135C  
 HNT3 YOR258W  
 MRM2 YGL136C  
 DUF1 YOL087C  
 NRG2 YBR066C  
 VPS64 YDR200C  
 YKL147C  
 AVT3 YKL146W  
 YML096W  
 PDR12 YPL058C  
 SLM2 YNL047C  
 SNN1 YNL086W  
 ATX2 YOR079C  
 YDR426C  
 YMR262W  
 CAF120 YNL278W  
 NKP1 YDR383C  
 AEP2 YMR282C  
 HXT14 YNL318C  
 PPZ2 YDR436W  
 YVC1 YOR087W  
 HPA3 YEL066W  
 UTR4 YEL038W  
 YOR041C  
 YEA6 YEL006W  
 LPX1 YOR084W  
 CUE5 YOR042W  
 YNL338W  
 CUR1 YPR158W  
 TDA6 YPR157W  
 PET111 YMR257C  
 MRPS9 YBR146W  
 ETT1 YOR051C  
 CAD1 YDR423C  
 ECM10 YEL030W  
 YOR055W  
 YSP3 YOR003W  
 CAN1 YEL063C  
 GTT3 YEL017W  
 AFG1 YEL052W  
 CYC7 YEL039C  
 ELP4 YPL101W  
 PAU2 YEL049W  
 YOR015W  
 DIT2 YDR402C  
 MUS81 YDR386W  
 YEL023C  
 RPL12A YEL054C  
 CYC2 YOR037W  
 KTR6 YPL053C  
 MIT1 YEL007W  
 TPO3 YPR156C  
 PRC1 YMR297W  
 FIG4 YNL325C  
 MDM36 YPR083W  
 YOR053W  
 BOR1 YNL275W  
 URN1 YPR152C  
 YOR082C  
 ERP4 YOR016C  
 SKI7 YOR076C  
 PIN3 YPR154W  
 CIN5 YOR028C  
 MID1 YNL291C  
 LCL1 YPL056C

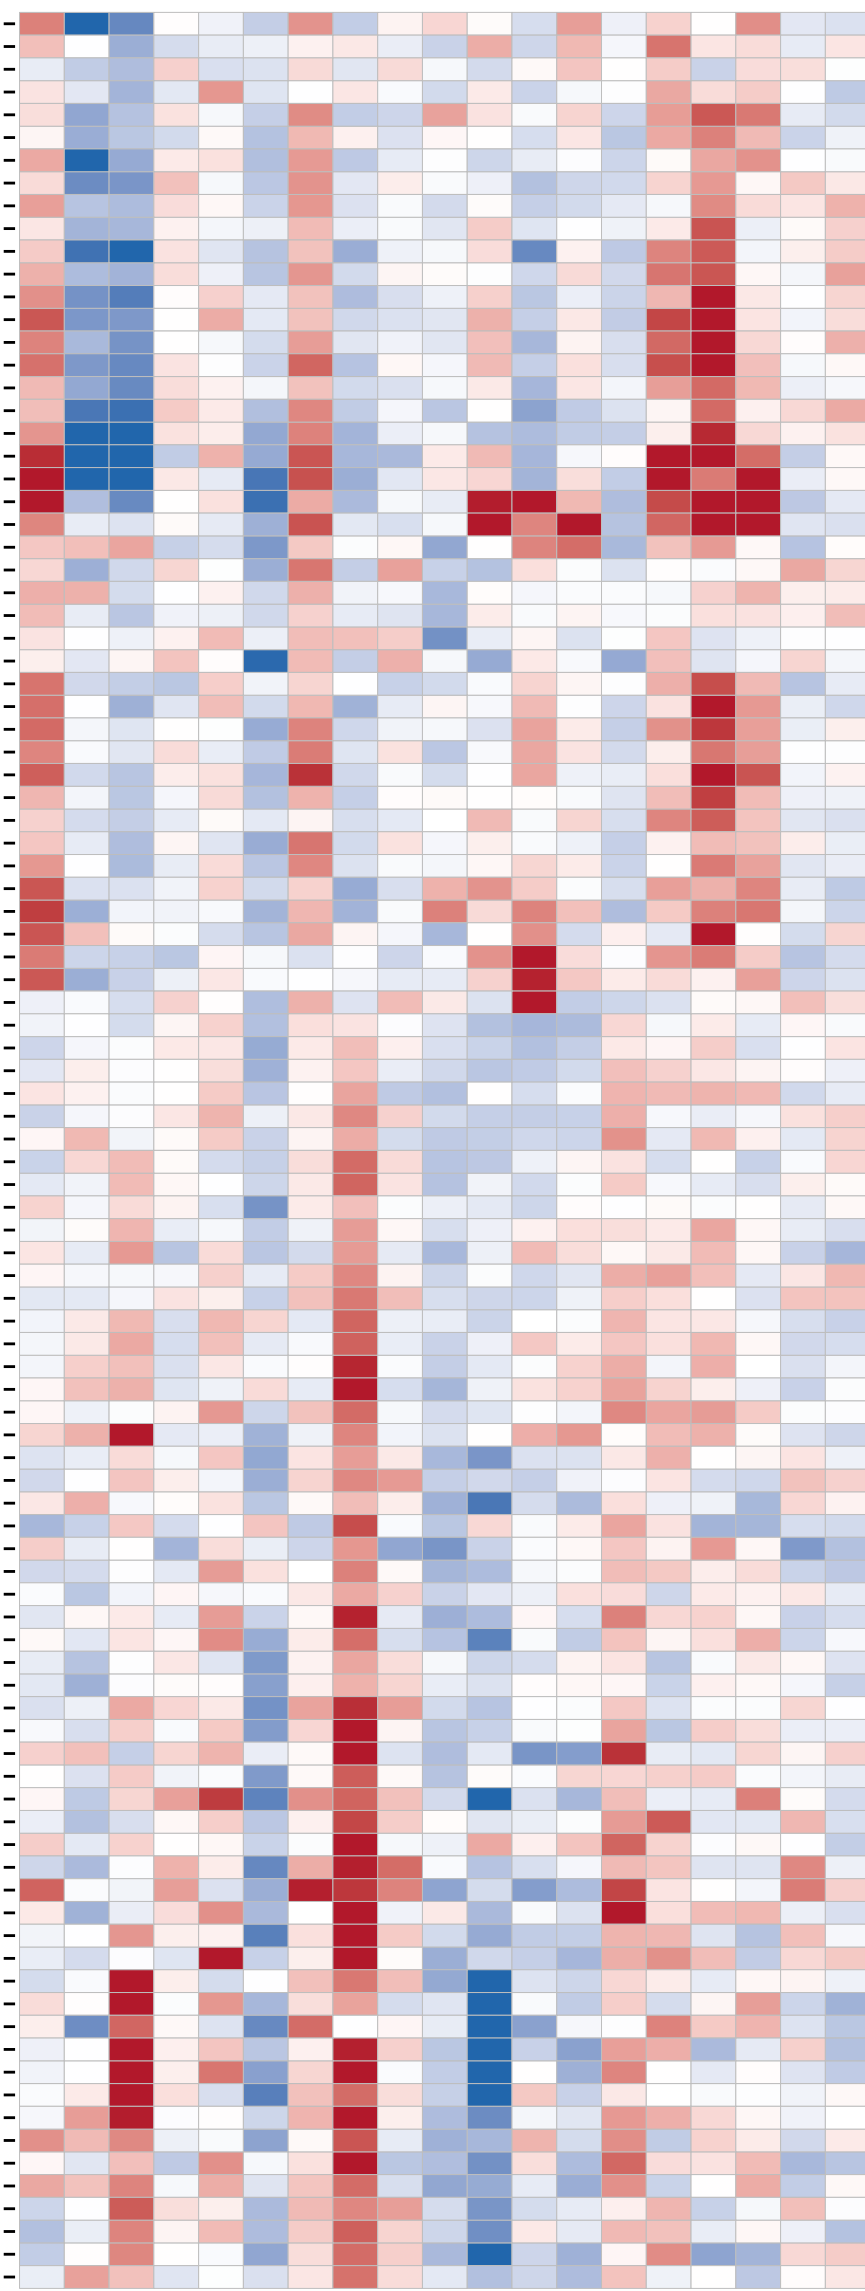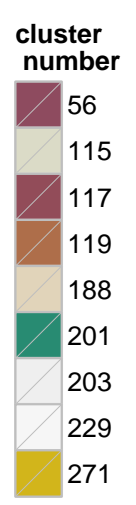

alanine -  
 aspartate -  
 glutamate -  
 phenylalanine -  
 glycine -  
 histidine -  
 isoleucine -  
 lysine -  
 leucine -  
 methionine -  
 asparagine -  
 proline -  
 glutamine -  
 arginine -  
 serine -  
 threonine -  
 valine -  
 tryptophan -  
 tyrosine -  
 cluster -

CLA4 YNL298W  
 PDR15 YDR406W  
 HBN1 YCL026C-B  
 YCL021W-A  
 GRX2 YDR513W  
 MSY1 YPL097W  
 SWC5 YBR231C  
 SSA2 YLL024C  
 YOR325W  
 YPR063C  
 REI1 YBR267W  
 APA2 YDR530C  
 PMT5 YDL093W  
 PUF6 YDR496C  
 YAR1 YPL239W  
 SGO1 YOR073W  
 NTC20 YBR188C  
 PHO80 YOL001W  
 RPS17B YDR447C  
 HGH1 YGR187C  
 CLB5 YPR120C  
 RAD55 YDR076W  
 TPS3 YMR261C  
 MME1 YMR166C  
 OCA2 YNL056W  
 OCA5 YHL029C  
 SIW14 YNL032W  
 OCA6 YDR067C  
 OCA4 YCR095C  
 ETR1 YBR026C  
 YEL025C  
 SIP1 YDR422C  
 YMR304C-A  
 MPA43 YNL249C  
 TIR2 YOR010C  
 LEM3 YNL323W  
 POC4 YPL144W  
 PPZ1 YML016C  
 RPB9 YGL070C  
 RSA3 YLR221C  
 HBS1 YKR084C  
 BRR1 YPR057W  
 GCN1 YGL195W  
 NUP84 YDL116W  
 SIN3 YOL004W  
 CDC73 YLR418C  
 RGI1 YER067W  
 NOP6 YDL213C  
 SPO74 YGL170C  
 KAP114 YGL241W  
 CAJ1 YER048C  
 YCR102C  
 YGR210C  
 TMN3 YER113C  
 TCB3 YML072C  
 YBR053C  
 ARE2 YNR019W  
 HNM1 YGL077C  
 SAS5 YOR213C  
 YNL046W  
 SET4 YJL105W  
 ART5 YGR068C  
 CTI6 YPL181W  
 CAF130 YGR134W  
 LSM1 YJL124C  
 SEF1 YBL066C  
 REX4 YOL080C  
 HIR1 YBL008W  
 YPL264C  
 CIS3 YJL158C  
 POT1 YIL160C  
 NIT3 YLR351C  
 FAR1 YJL157C  
 CMK1 YFR014C  
 MDR1 YGR100W  
 PHO89 YBR296C  
 GNT1 YOR320C  
 UPS3 YDR185C  
 ATG31 YDR022C  
 PMT2 YAL023C  
 PMT6 YGR199W  
 SAE3 YHR079C-A  
 YPS6 YIR039C  
 RKM4 YDR257C  
 YLR352W  
 DIC1 YLR348C  
 TRM9 YML014W  
 PUT4 YOR348C  
 YKR018C  
 RMD1 YDL001W  
 YRA2 YKL214C  
 YNR061C  
 PGM1 YKL127W  
 FET5 YFL041W  
 MSC1 YML128C  
 MNT3 YIL014W  
 PAU11 YGL261C  
 ECM34 YHL043W  
 CIR1 YGR207C  
 YHL044W

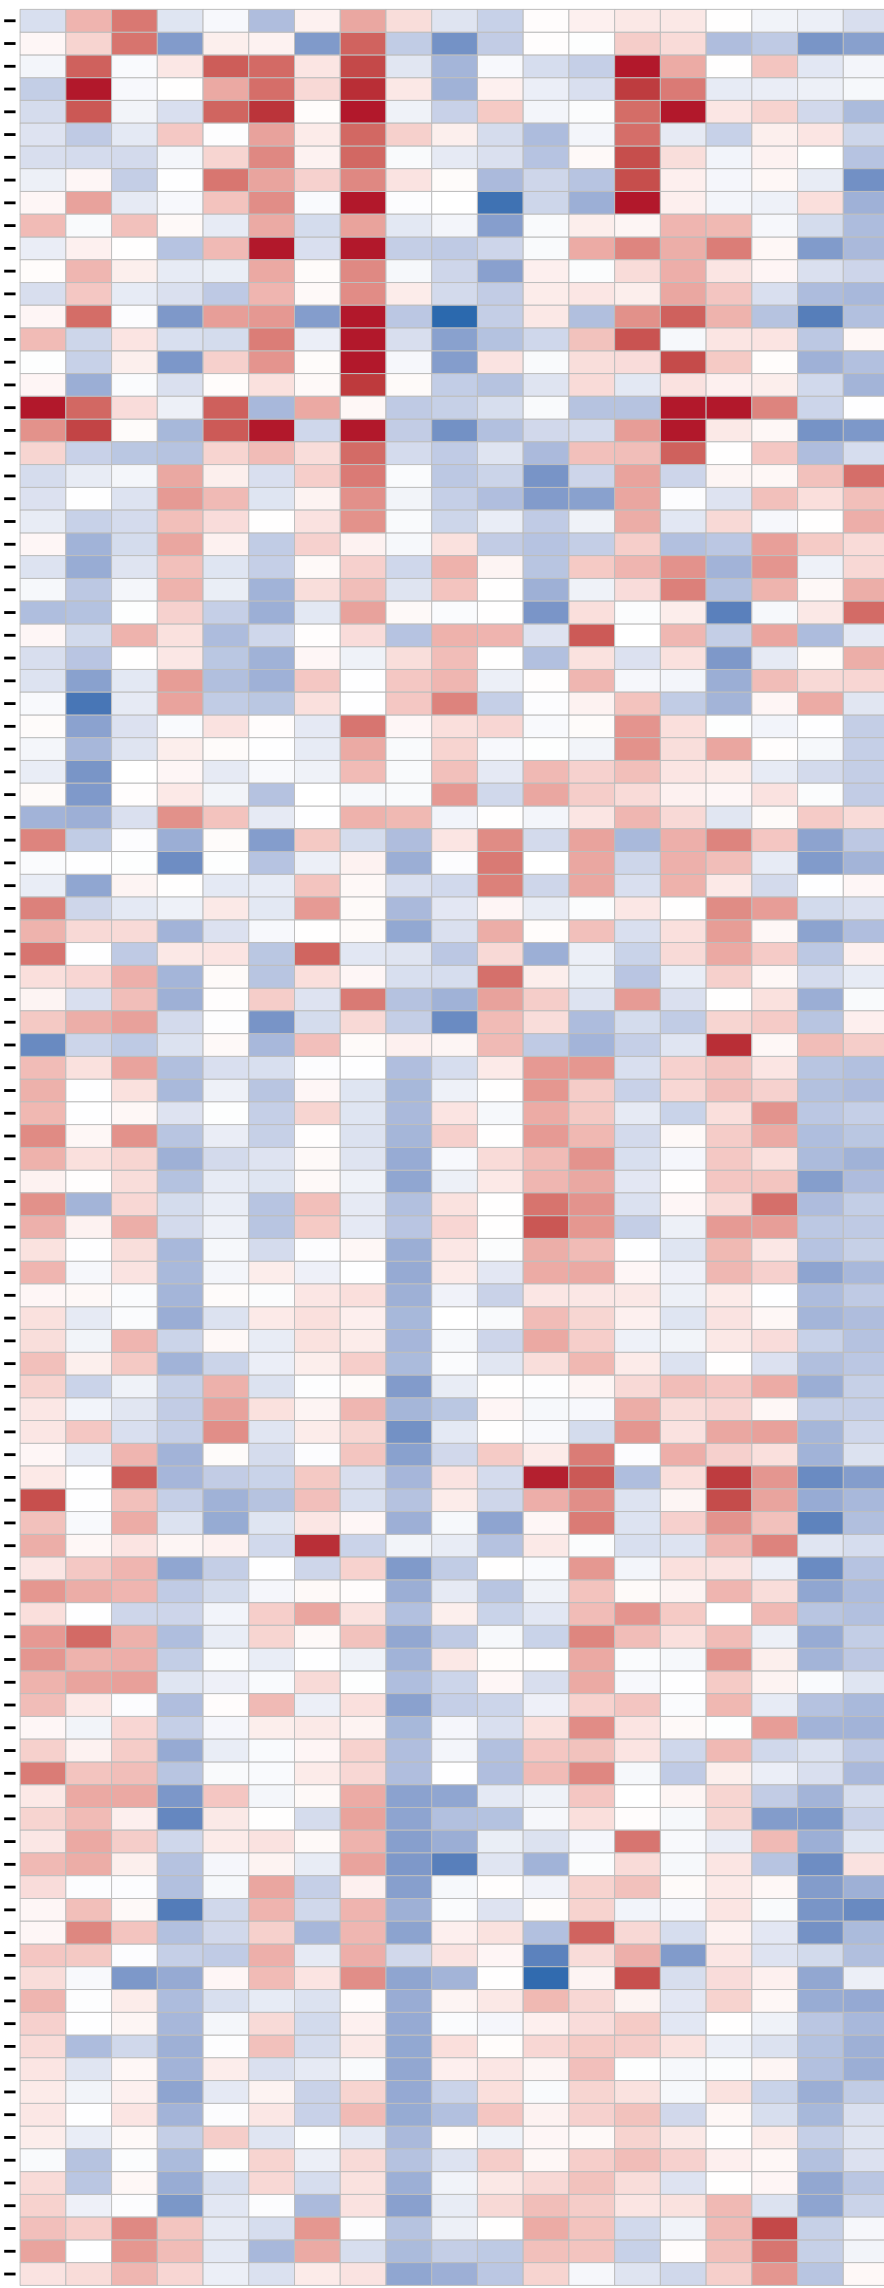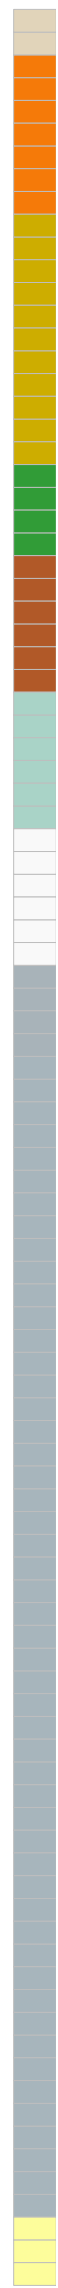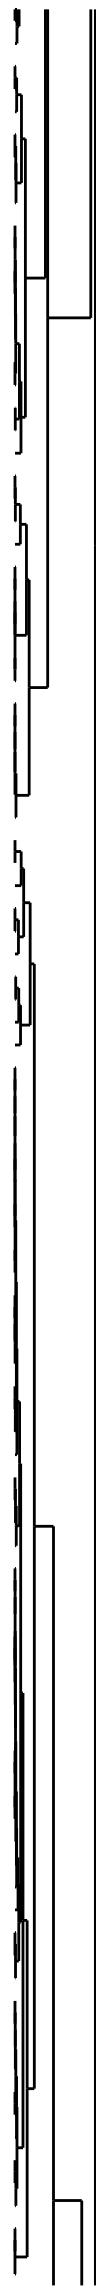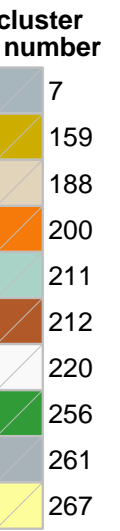

alanine -  
 aspartate -  
 glutamate -  
 phenylalanine -  
 glycine -  
 histidine -  
 isoleucine -  
 lysine -  
 leucine -  
 methionine -  
 asparagine -  
 proline -  
 glutamine -  
 arginine -  
 serine -  
 threonine -  
 valine -  
 tryptophan -  
 tyrosine -  
 cluster -



QDR2 YIL121W  
 SDS3 YIL084C  
 COA1 YIL157C  
 SUC2 YIL162W  
 TIR3 YIL011W  
 PAF1 YBR279W  
 BNR1 YIL159W  
 KGD1 YIL125W  
 BAR1 YIL015W  
 PFD1 YJL179W  
 RRT7 YLL030C  
 YIL165C  
 HOS2 YGL194C  
 SNT1 YCR033W  
 SET3 YKR029C  
 SIF2 YBR103W  
 YJL119C  
 YJL169W  
 SET2 YJL168C  
 EGD2 YHR193C  
 AVT7 YIL088C  
 MSL1 YIR009W  
 RPL16A YIL133C  
 YPR071W  
 YLL044W  
 VPS1 YKR001C  
 RPL1B YGL135W  
 SRV2 YNL138W  
 RCO1 YMR075W  
 YMR075C-A  
 LOA1 YPR139C  
 NUP120 YKL057C  
 RPS10A YOR293W  
 IRC25 YLR021W  
 LOC1 YFR001W  
 YBR225W  
 CTK3 YML112W  
 GON7 YJL184W  
 FUI1 YBL042C  
 YBR197C  
 HCR1 YLR192C  
 YPT10 YBR264C  
 UAF30 YOR295W  
 BFR1 YOR198C  
 TSR2 YLR435W  
 LSM6 YDR378C  
 FIN1 YDR130C  
 HOF1 YMR032W  
 EMP24 YGL200C  
 ARP8 YOR141C  
 RPS27B YHR021C  
 BUD31 YCR063W  
 NAT3 YPR131C  
 RPS16A YMR143W  
 EFG1 YGR271C-A  
 BUD23 YCR047C  
 LTV1 YKL143W  
 SPT10 YJL127C  
 MOT2 YER068W  
 RPS7A YOR096W  
 RRP8 YDR083W  
 RPL20A YMR242C  
 RPS29A YLR388W  
 RPS0A YGR214W  
 YGL088W  
 FMP25 YLR077W  
 RPS18A YDR450W  
 RPL14A YKL006W  
 HIT1 YJR055W  
 RSA1 YPL193W  
 HMO1 YDR174W  
 RPS9B YBR189W  
 RPS11B YBR048W  
 RPS16B YDL083C  
 IRC13 YOR235W  
 RPS19B YNL302C  
 RPS18B YML026C  
 MUP1 YGR055W  
 RPS19A YOL121C  
 RPS10B YMR230W  
 RPS21A YKR057W  
 TGS1 YPL157W  
 RPS14A YCR031C  
 RPS1A YLR441C  
 RPA14 YDR156W  
 FYV7 YLR068W  
 CPR7 YJR032W  
 APQ12 YIL040W  
 SEM1 YDR363W-A  
 PHO5 YBR093C  
 RPS28B YLR264W  
 YGR054W  
 RPS28A YOR167C  
 RPS22B YLR367W  
 RPS7B YNL096C  
 RPS0B YLR048W  
 YGR160W  
 RPS17A YML024W  
 RPS4B YHR203C  
 ULS1 YOR191W

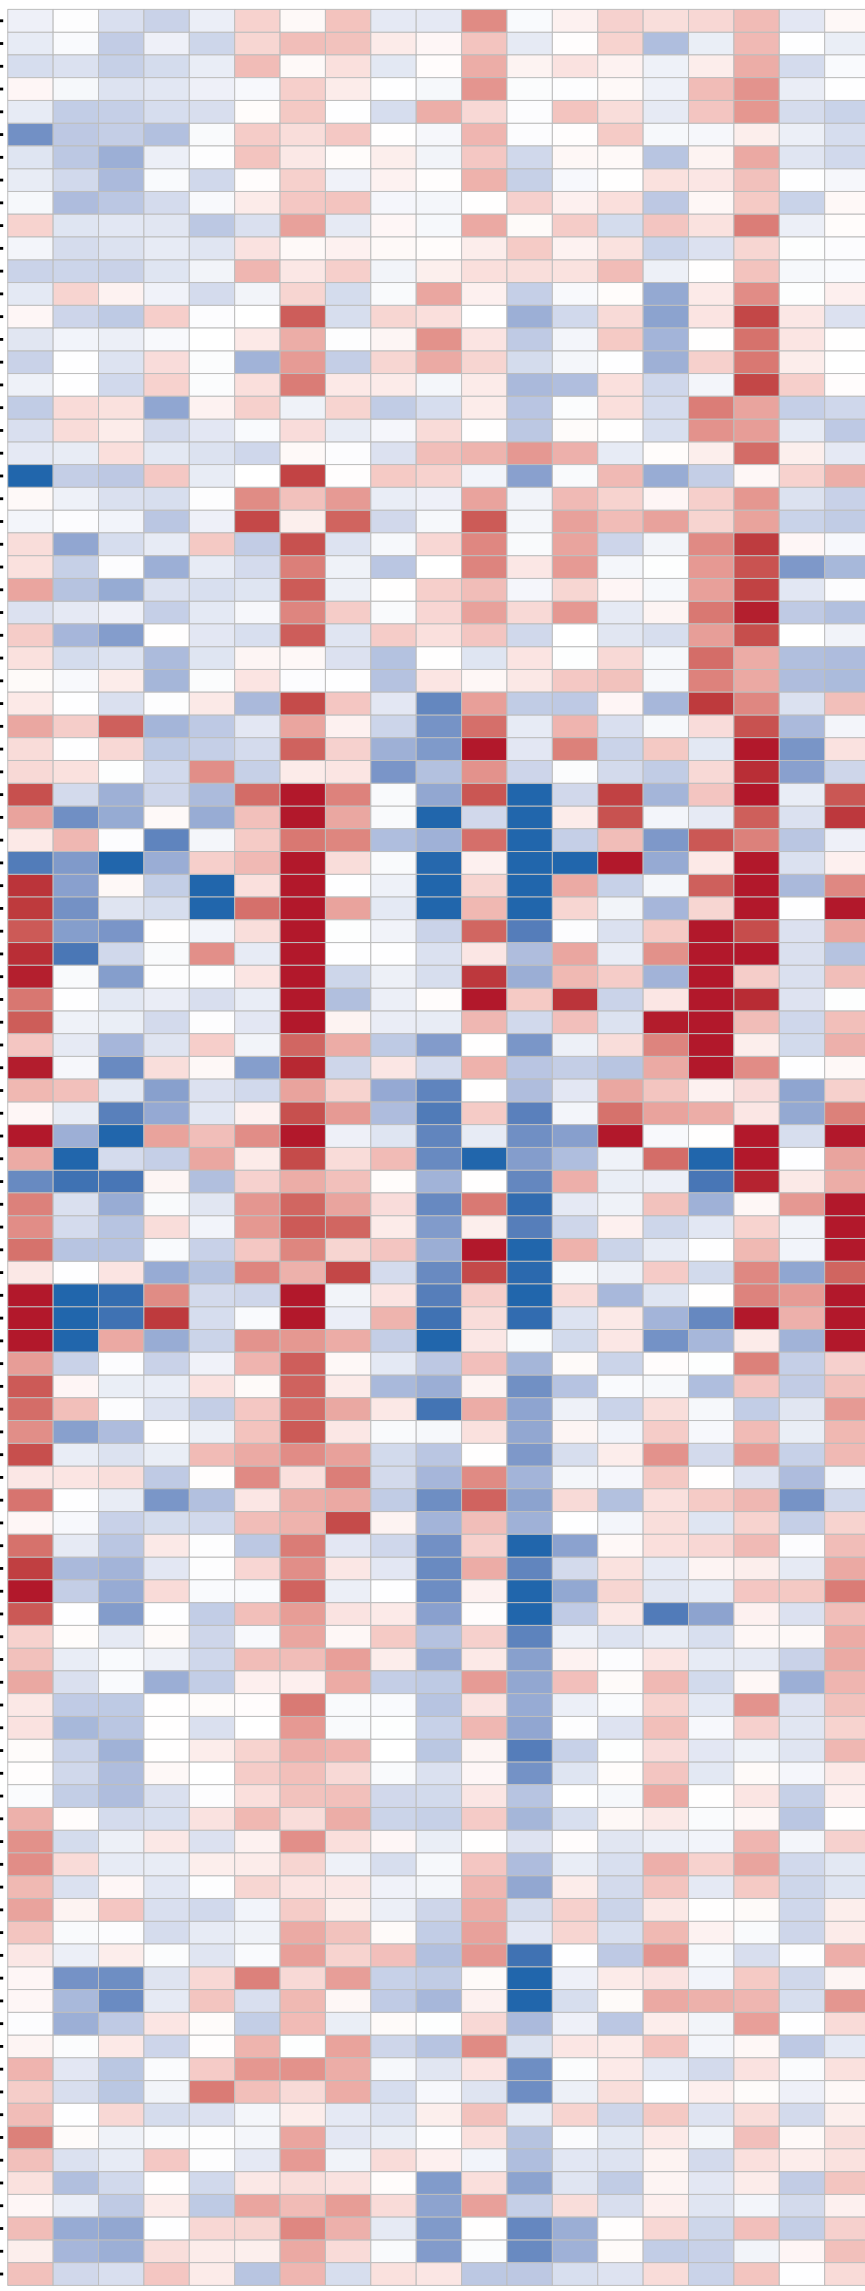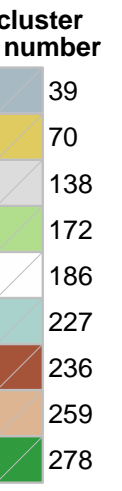

alanine -  
 aspartate -  
 glutamate -  
 phenylalanine -  
 glycine -  
 histidine -  
 isoleucine -  
 lysine -  
 leucine -  
 methionine -  
 asparagine -  
 proline -  
 glutamine -  
 arginine -  
 serine -  
 threonine -  
 valine -  
 tryptophan -  
 tyrosine -  
 cluster -

BUD26 YDR241W  
 RPS29B YDL061C  
 DOM34 YNL001W  
 SWM2 YNR004W  
 YMR326C  
 RPS27A YKL156W  
 YSA1 YBR111C  
 LIA1 YJR070C  
 YER156C  
 MUB1 YMR100W  
 PIH1 YHR034C  
 UBR2 YLR024C  
 HER2 YMR293C  
 MSM1 YGR171C  
 PPA2 YMR267W  
 MRPL33 YMR286W  
 SLT2 YHR030C  
 MSF1 YPR047W  
 SUV3 YPL029W  
 MRPL20 YKR085C  
 MTF1 YMR228W  
 YGP1 YNL160W  
 SHU2 YDR078C  
 CCM1 YGR150C  
 KNH1 YDL049C  
 MRPL16 YBL038W  
 RRG8 YPR116W  
 MRH4 YGL064C  
 MRPL22 YNL177C  
 RMD9 YGL107C  
 MRPL11 YDL202W  
 RSM27 YGR215W  
 SPO23 YBR250W  
 MRPL38 YKL170W  
 ATG20 YDL113C  
 GTF1 YGR102C  
 GEP3 YOR205C  
 AVL9 YLR114C  
 MRPL40 YPL173W  
 PET112 YBL080C  
 SWD3 YBR175W  
 ATP4 YPL078C  
 LDB17 YDL146W  
 EUG1 YDR518W  
 TIM11 YDR322C-A  
 POR1 YNL055C  
 VPS33 YLR396C  
 RPH1 YER169W  
 AEP1 YMR064W  
 RRG9 YNL213C  
 RSM26 YJR101W  
 YDR114C  
 MTG2 YHR168W  
 PKH2 YOL100W  
 DCS1 YLR270W  
 MRP1 YDR347W  
 EXO5 YBR163W  
 IMG2 YCR071C  
 FRA2 YGL220W  
 UBC5 YDR059C  
 FZO1 YBR179C  
 GEP5 YLR091W  
 ROX3 YBL093C  
 RSM22 YKL155C  
 MRPL17 YNL252C  
 PET123 YOR158W  
 YGR219W  
 HTB2 YBL002W  
 TVP18 YMR071C  
 ATP5 YDR298C  
 YOR199W  
 RML2 YEL050C  
 FYV6 YNL133C  
 MHR1 YDR296W  
 YJR114W  
 YJL027C  
 ATP25 YMR098C  
 MRPL10 YNL284C  
 RRG7 YOR305W  
 MRPL7 YDR237W  
 MRPL36 YBR122C  
 MEC3 YLR288C  
 PRO1 YDR300C  
 MSE1 YOL033W  
 MEF2 YJL102W  
 ADD37 YMR184W  
 YKL169C  
 QRI5 YLR204W  
 CBC2 YPL178W  
 YHR175W-A  
 HEM14 YER014W  
 MGM101 YJR144W  
 RIM1 YCR028C-A  
 RRG1 YDR065W  
 SLM5 YCR024C  
 SLS1 YLR139C  
 ISW1 YBR245C  
 AGP2 YBR132C  
 ARP5 YNL059C  
 GLO3 YER122C

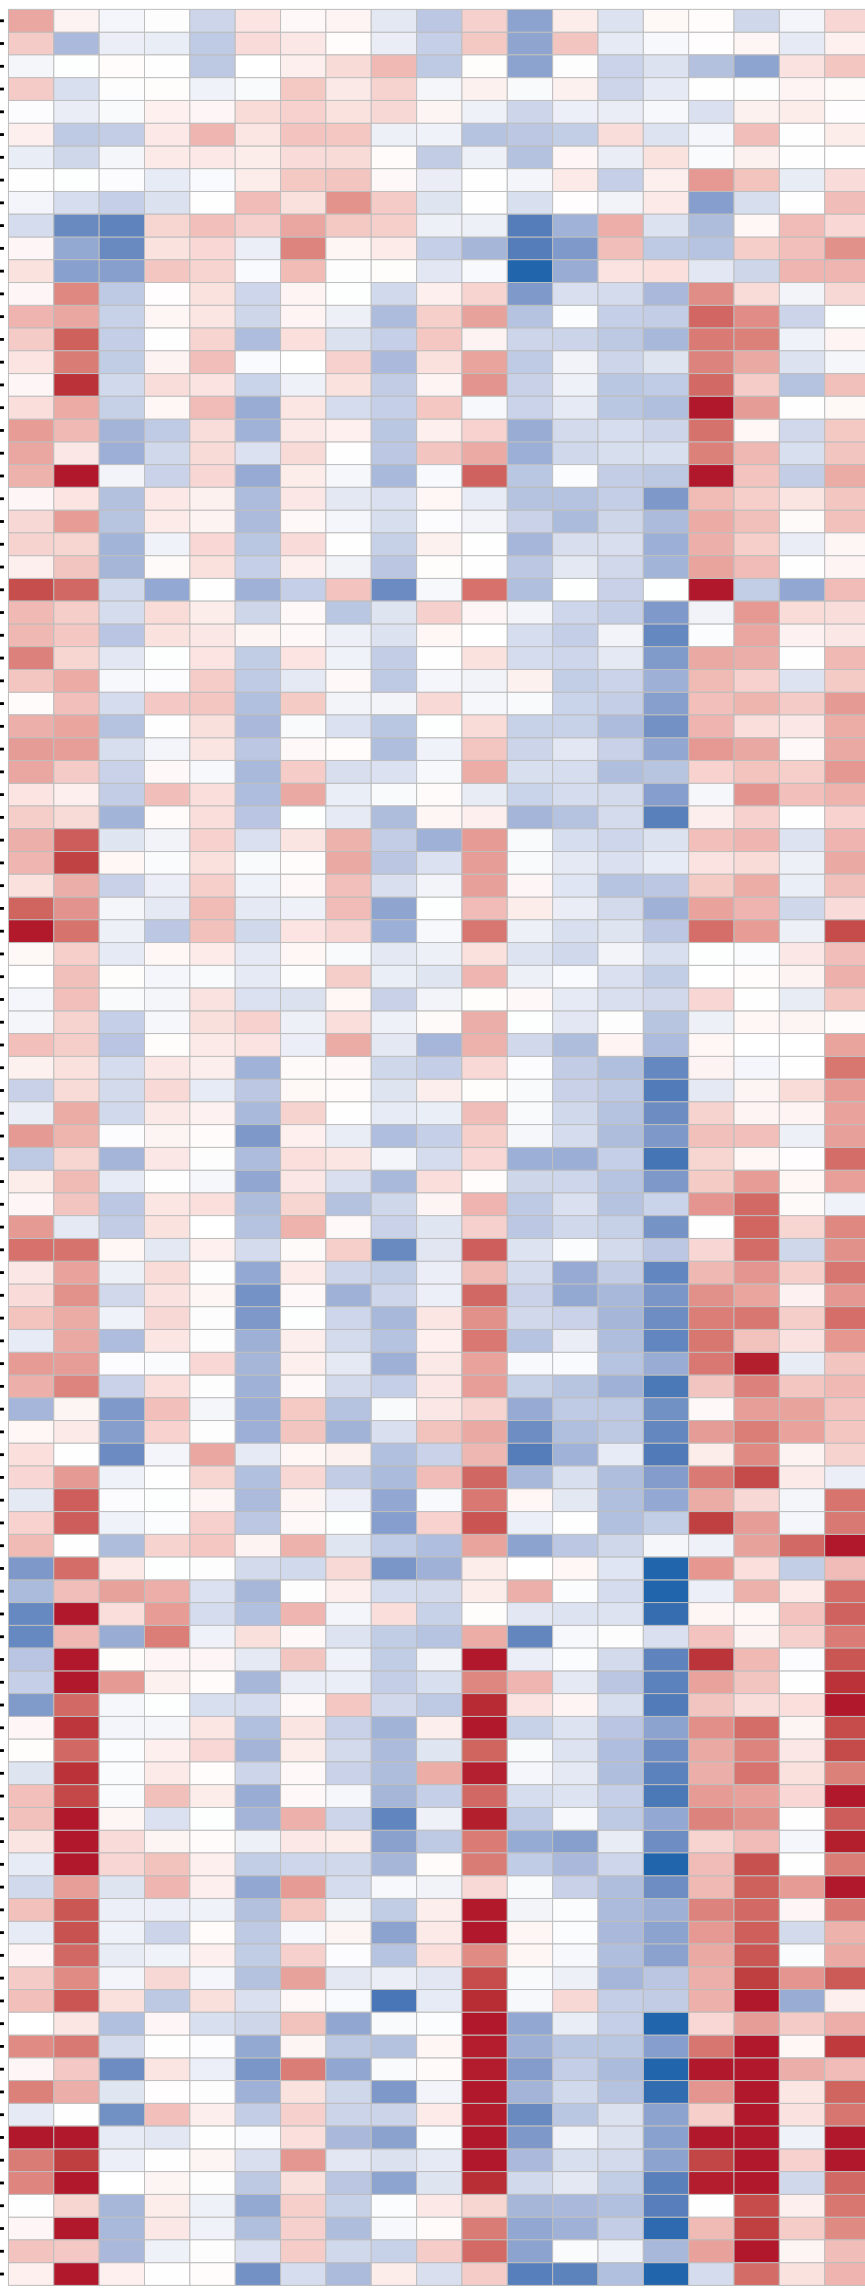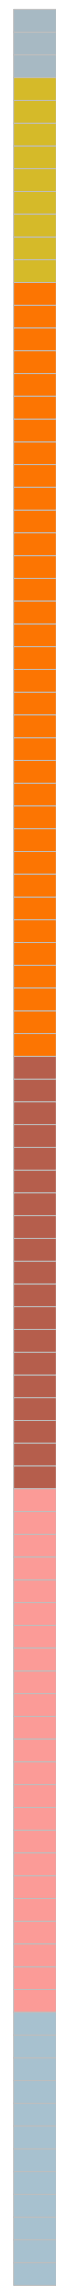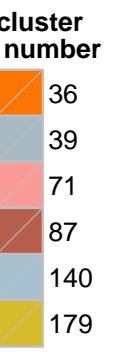

alanine -  
 aspartate -  
 glutamate -  
 phenylalanine -  
 glycine -  
 histidine -  
 isoleucine -  
 lysine -  
 leucine -  
 methionine -  
 asparagine -  
 proline -  
 glutamine -  
 arginine -  
 serine -  
 threonine -  
 valine -  
 tryptophan -  
 tyrosine -  
 cluster -

ATP23 YNR020C  
 INH1 YDL181W  
 MGM1 YOR211C  
 YNL184C  
 MST1 YKL194C  
 MRP21 YBL090W  
 RSM18 YER050C  
 PET130 YJL023C  
 RSM23 YGL129C  
 PET100 YDR079W  
 YBL012C  
 MRF1 YGL143C  
 LAG2 YOL025W  
 MRPL3 YMR024W  
 MIP1 YOR330C  
 MRPL32 YCR003W  
 MRPS35 YGR165W  
 JEM1 YJL073W  
 MTG1 YMR097C  
 SAM37 YMR060C  
 SGF73 YGL066W  
 MRPL9 YGR220C  
 PDB1 YBR221C  
 MRPL15 YLR312W-A  
 MMR1 YLR190W  
 PRX1 YBL064C  
 IMP2 YMR035W  
 COX20 YDR231C  
 YNL170W  
 DSS1 YMR287C  
 OXA1 YER154W  
 YTA12 YMR089C  
 ATP22 YDR350C  
 GIN4 YDR507C  
 MRP17 YKL003C  
 MRP20 YDR405W  
 LCB5 YLR260W  
 YBL044W  
 SOV1 YMR066W  
 YMR084W  
 MSW1 YDR268W  
 AEP3 YPL005W  
 SSA4 YER103W  
 MRP51 YPL118W  
 GEM1 YAL048C  
 MTF2 YDL044C  
 MRM1 YOR201C  
 SPS1 YDR523C  
 SYO1 YDL063C  
 YDL062W  
 MRPL4 YLR439W  
 MRPL13 YKR006C  
 YDR042C  
 FRK1 YPL141C  
 CYK3 YDL117W  
 ECM30 YLR436C  
 SRO7 YPR032W  
 YMR034C  
 GSF2 YML048W  
 YPS7 YDR349C  
 RIF2 YLR453C  
 PUN1 YLR414C  
 FAA4 YMR246W  
 YBR220C  
 YOR012W  
 YOR343C  
 RTS1 YOR014W  
 RHO4 YKR055W  
 RVS161 YCR009C  
 TYE7 YOR344C  
 YBR284W  
 YMR158C-A  
 AIM34 YMR003W  
 TOM6 YOR045W  
 SYS1 YJL004C  
 AMF1 YOR378W  
 SNT309 YPR101W  
 SRS2 YJL092W  
 FSH1 YHR049W  
 DNL4 YOR005C  
 MSC7 YHR039C  
 GIM4 YEL003W  
 ATG5 YPL149W  
 DBP1 YPL119C  
 GLT1 YDL171C  
 YLR171W  
 RAD9 YDR217C  
 RRD2 YPL152W  
 SOK2 YMR016C  
 MAD3 YJL013C  
 YGL108C  
 HTA2 YBL003C  
 HRT3 YLR097C  
 YJR030C  
 TMA17 YDL110C  
 THI6 YPL214C  
 GEA1 YJR031C  
 YLL020C  
 SHU1 YHL006C  
 SLI1 YGR212W

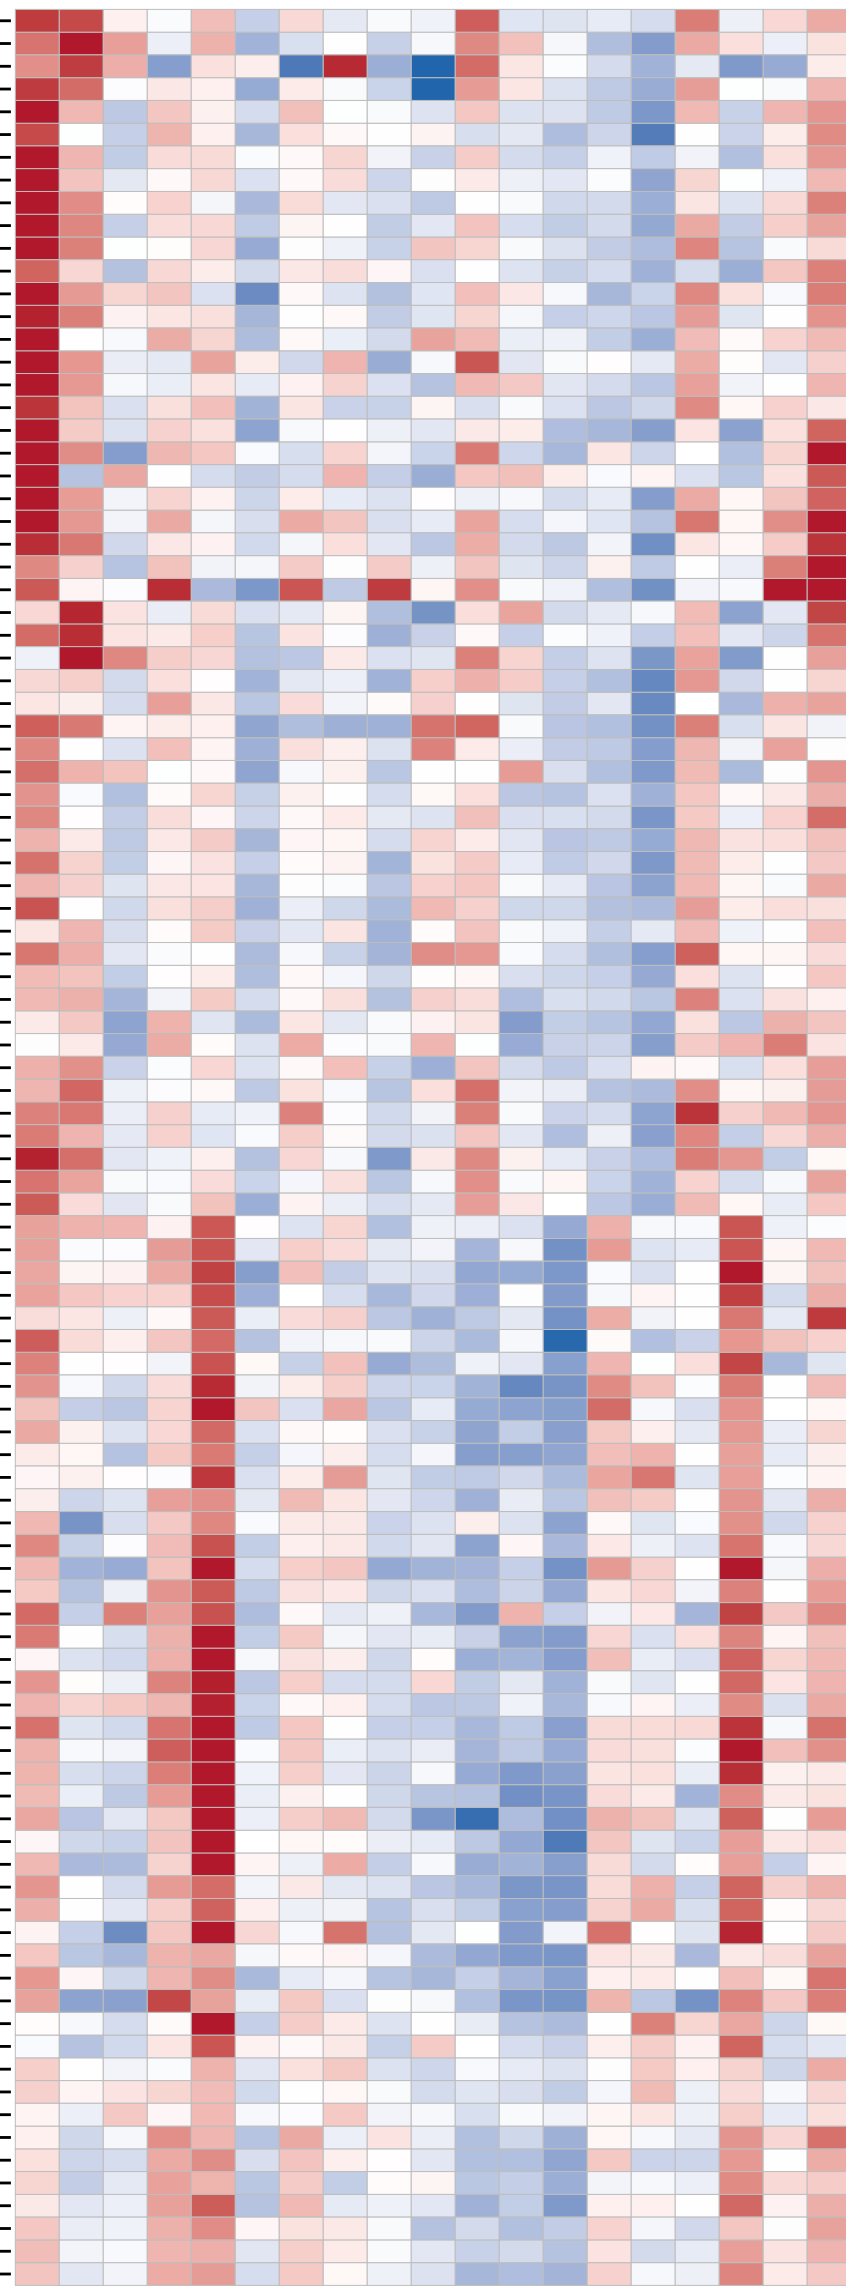

**z-score**  
 5.0  
 2.5  
 0.0  
 -2.5  
 -5.0

**cluster number**  
 5  
 50  
 55

alanine -  
 aspartate -  
 glutamate -  
 phenylalanine -  
 glycine -  
 histidine -  
 isoleucine -  
 lysine -  
 leucine -  
 methionine -  
 asparagine -  
 proline -  
 glutamine -  
 arginine -  
 serine -  
 threonine -  
 valine -  
 tryptophan -  
 tyrosine -  
 cluster -

YPL216W  
 CNB1 YKL190W  
 RGP1 YDR137W  
 YOR029W  
 YMR252C  
 WHI5 YOR083W  
 ROD1 YOR018W  
 BMH1 YER177W  
 KEX2 YNL238W  
 PBP1 YGR178C  
 YKL044W  
 YLR402W  
 EEB1 YPL095C  
 MCH4 YOL119C  
 YMR144W  
 SOL3 YHR163W  
 MSH1 YHR120W  
 INA17 YPL099C  
 ITC1 YGL133W  
 YIA6 YIL006W  
 CPD1 YGR247W  
 COQ4 YDR204W  
 YDC1 YPL087W  
 MMT1 YMR177W  
 ALB1 YJL122W  
 PRM10 YJL108C  
 BUD14 YAR014C  
 SPO19 YPL130W  
 YPL114W  
 ISU1 YPL135W  
 YPL162C  
 UBP13 YBL067C  
 KAP120 YPL125W  
 RNY1 YPL123C  
 YMR173W-A  
 DMC1 YER179W  
 MSH5 YDL154W  
 KES1 YPL145C  
 YMR196W  
 RPL1A YPL220W  
 YER181C  
 CAR1 YPL111W  
 YMR141C  
 SVS1 YPL163C  
 YIG1 YPL201C  
 POP2 YNR052C  
 KRE28 YDR532C  
 CCR4 YAL021C  
 YML094C-A  
 YKE2 YLR200W  
 RPS6A YPL090C  
 FYV1 YDR024W  
 CIN8 YEL061C  
 RPS11A YDR025W  
 NGL1 YOL042W  
 IWR1 YDL115C  
 NUP188 YML103C  
 PDX3 YBR035C  
 THI3 YDL080C  
 MRK1 YDL079C  
 THI22 YPR121W  
 LEE1 YPL054W  
 BUD21 YOR078W  
 RAD59 YDL059C  
 YDL012C  
 KTR4 YBR199W  
 ALG8 YOR067C  
 ARL1 YBR164C  
 YPR003C  
 YEF1 YEL041W  
 YOR072W  
 YNL266W  
 YMR031W-A  
 VAC8 YEL013W  
 DBF2 YGR092W  
 PCS60 YBR222C  
 YPL108W  
 SBE2 YDR351W  
 RPS23B YPR132W  
 ARD1 YHR013C  
 ITR1 YDR497C  
 STE14 YDR410C  
 ILM1 YJR118C  
 YBR196C-A  
 PCL5 YHR071W  
 YML012C-A  
 SAC1 YKL212W  
 RSM19 YNR037C  
 VID22 YLR373C  
 NUP133 YKR082W  
 YLR224W  
 MNN10 YDR245W  
 SYF2 YGR129W  
 GCR2 YNL199C  
 YNL198C  
 SRB2 YHR041C  
 SOH1 YGL127C  
 FYV4 YHR059W  
 YOL050C  
 SPT8 YLR055C

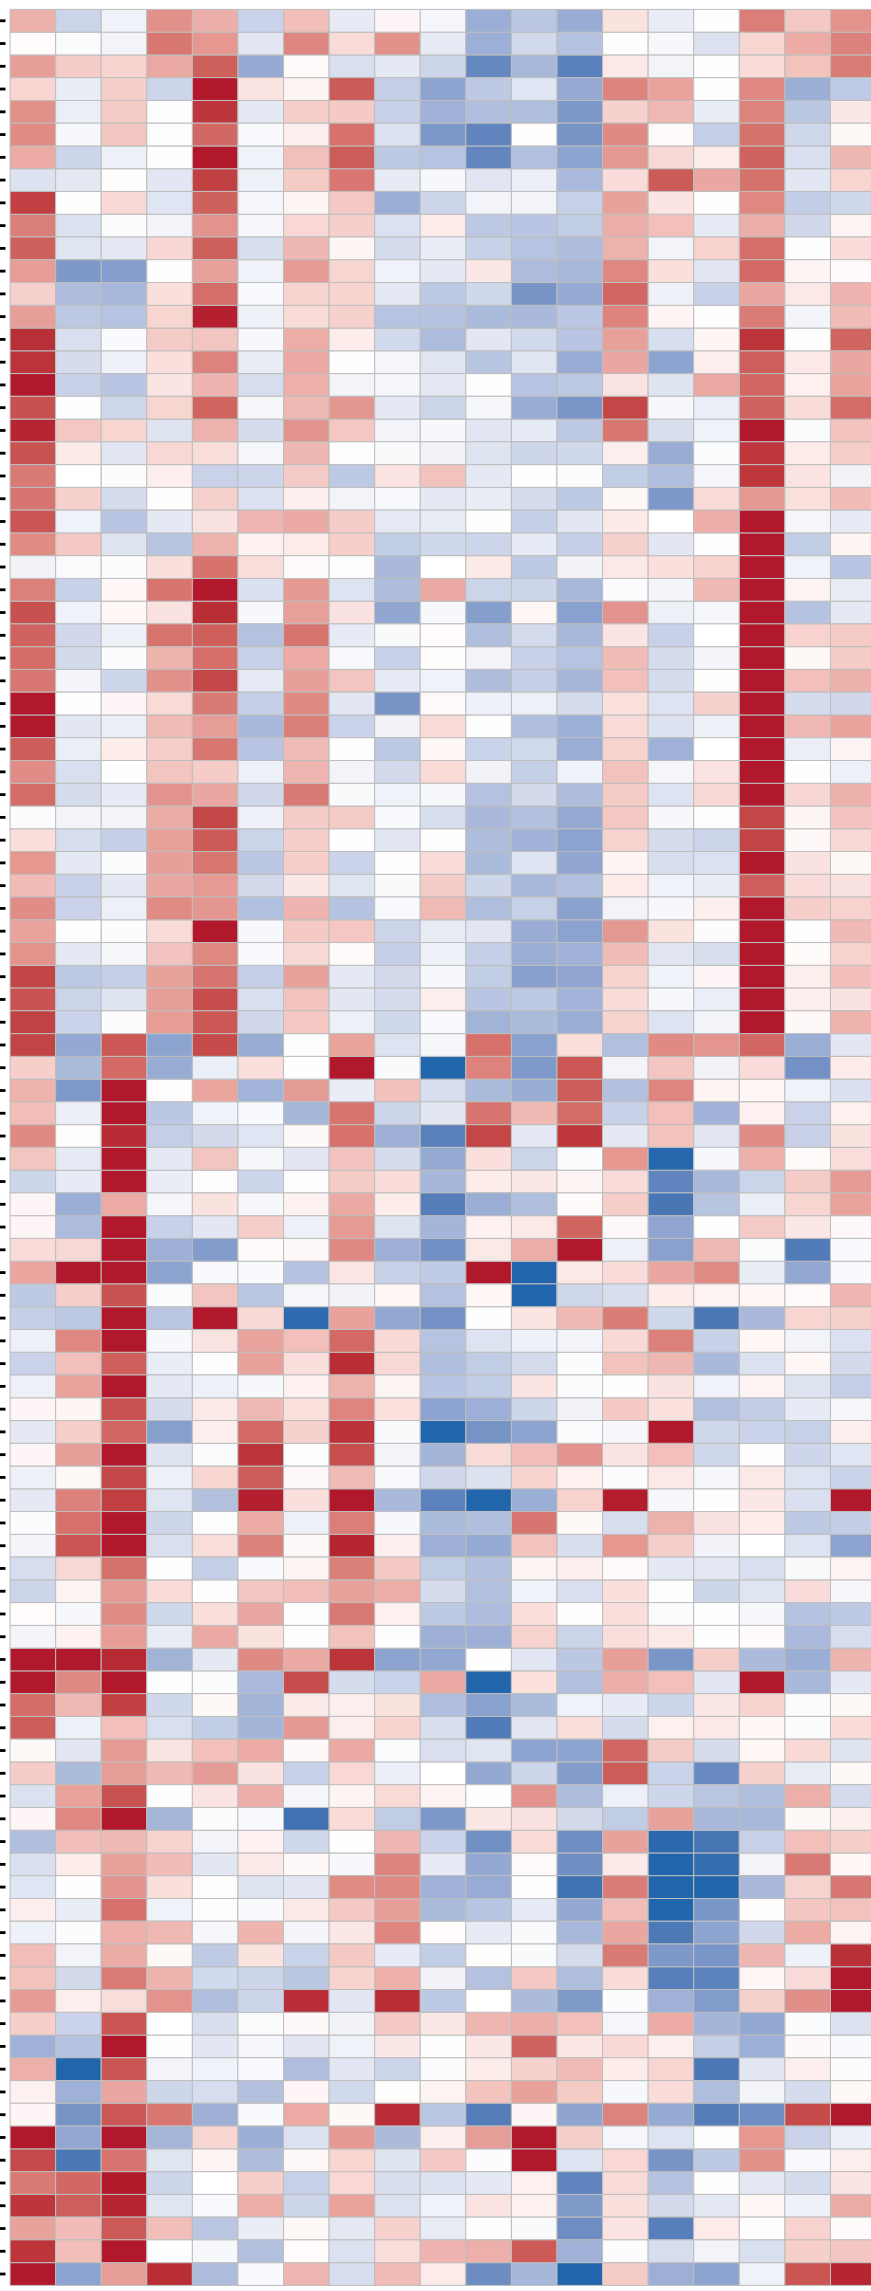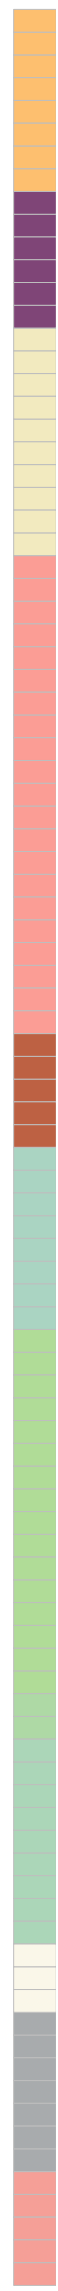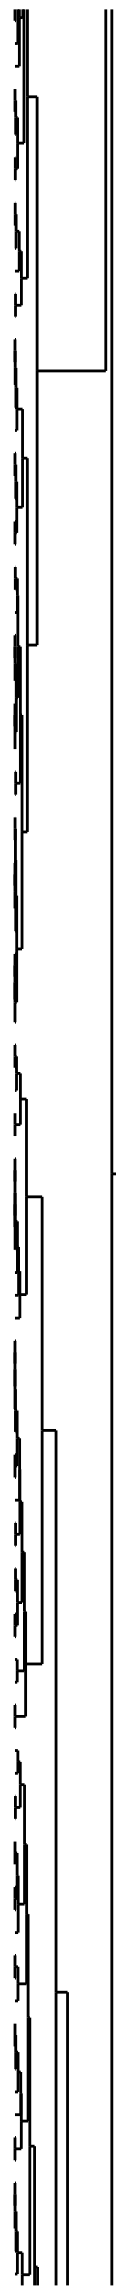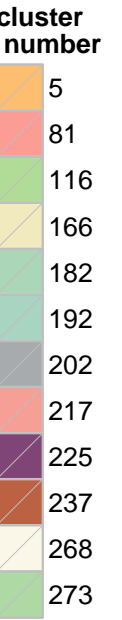

alanine -  
 aspartate -  
 glutamate -  
 phenylalanine -  
 glycine -  
 histidine -  
 isoleucine -  
 lysine -  
 leucine -  
 methionine -  
 asparagine -  
 proline -  
 glutamine -  
 arginine -  
 serine -  
 threonine -  
 valine -  
 tryptophan -  
 tyrosine -  
 cluster -

YGL007C-A  
 YCR087C-A  
 NPP1 YCR026C  
 PFA3 YNL326C  
 PEP1 YBL017C  
 CKA2 YOR061W  
 MOG1 YJR074W  
 ERG3 YLR056W  
 CDC50 YCR094W  
 RCY1 YJL204C  
 SMI1 YGR229C  
 YDR442W  
 RAV1 YJR033C  
 YDL180W  
 PKR1 YMR123W  
 GOS1 YHL031C  
 YKL096C-B  
 VPS53 YJL029C  
 TLG2 YOL018C  
 VPS51 YKR020W  
 VPS9 YML097C  
 ELM1 YKL048C  
 GUP1 YGL084C  
 VIK1 YPL253C  
 GYP1 YOR070C  
 YPT6 YLR262C  
 DRS2 YAL026C  
 CSF1 YLR087C  
 COG8 YML071C  
 TRS85 YDR108W  
 YLR111W  
 CCW12 YLR110C  
 KRE1 YNL322C  
 BST1 YFL025C  
 PNT1 YOR266W  
 THI7 YLR237W  
 SYP1 YCR030C  
 RAD27 YKL113C  
 RPS30B YOR182C  
 YAF9 YNL107W  
 DST1 YGL043W  
 MMS22 YLR320W  
 PHO88 YBR106W  
 YMR010W  
 RAD52 YML032C  
 COX17 YLL009C  
 SIR4 YDR227W  
 SIR3 YLR442C  
 FMC1 YIL098C  
 RAD50 YNL250W  
 RAD5 YLR032W  
 SIR2 YDL042C  
 YDL041W  
 GIM5 YML094W  
 KIN4 YOR233W  
 EXO1 YOR033C  
 HCM1 YCR065W  
 SWM1 YDR260C  
 FLC2 YAL053W  
 SLX5 YDL013W  
 NUP2 YLR335W  
 CDC26 YFR036W  
 XRS2 YDR369C  
 RTR1 YER139C  
 HOG1 YLR113W  
 EMC6 YLL014W  
 SCW4 YGR279C  
 PDE1 YGL248W  
 YEL057C  
 END3 YNL084C  
 SUB1 YMR039C  
 PTH2 YBL057C  
 SSA1 YAL005C  
 VRP1 YLR337C  
 SAC7 YDR389W  
 INP51 YIL002C  
 NUP60 YAR002W  
 SSE1 YPL106C  
 GRS1 YBR121C  
 SWF1 YDR126W  
 YLR177W  
 OPI7 YDR360W  
 SHE4 YOR035C  
 CWH41 YGL027C  
 FUS3 YBL016W  
 SLA1 YBL007C  
 UBP15 YMR304W  
 VBA4 YDR119W  
 YMR1 YJR110W  
 NCA3 YJL116C  
 STE24 YJR117W  
 YIL046W-A  
 GPH1 YPR160W  
 KRE6 YPR159W  
 YCR025C  
 YCL046W  
 CNE1 YAL058W  
 CHS1 YNL192W  
 DCW1 YKL046C  
 DCS2 YOR173W

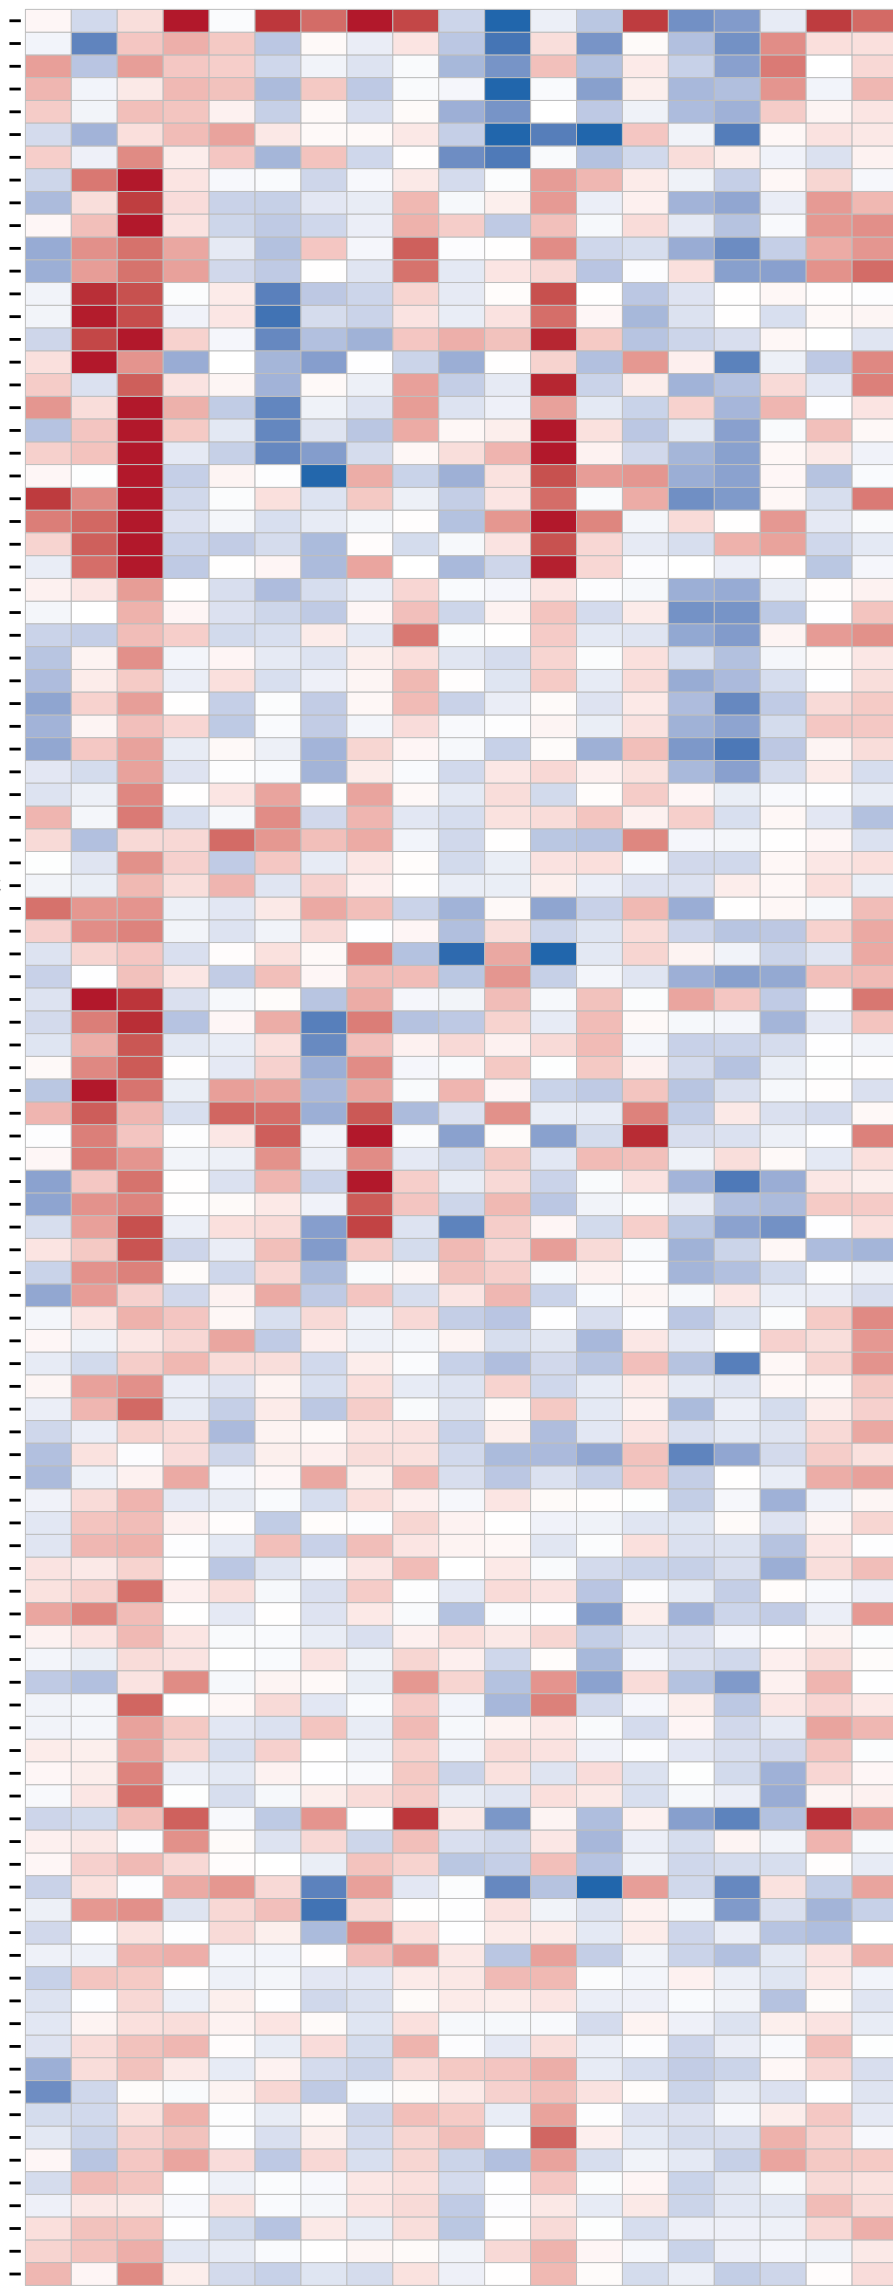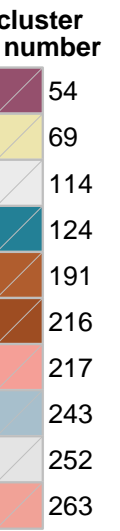

alanine -  
 aspartate -  
 glutamate -  
 phenylalanine -  
 glycine -  
 histidine -  
 isoleucine -  
 lysine -  
 leucine -  
 methionine -  
 asparagine -  
 proline -  
 glutamine -  
 arginine -  
 serine -  
 threonine -  
 valine -  
 tryptophan -  
 tyrosine -  
 cluster -

CTS2 YDR371W  
 NRG1 YDR043C  
 SPR2 YOR214C  
 KEX1 YGL203C  
 UBP14 YBR058C  
 GAS1 YMR307W  
 YCR050C  
 SFB3 YHR098C  
 UME1 YPL139C  
 ECM27 YJR106W  
 YJL175W  
 NEW1 YPL226W  
 YBR238C  
 FRE6 YLL051C  
 RPE1 YJL121C  
 YOL057W  
 MCM22 YJR135C  
 SDH5 YOL071W  
 YOL046C  
 TPM1 YNL079C  
 YDR089W  
 YDR203W  
 ARF1 YDL192W  
 COG6 YNL041C  
 YUR1 YJL139C  
 RSF2 YJR127C  
 YDL094C  
 CRC1 YOR100C  
 YGR025W  
 MUK1 YPL070W  
 ZIP2 YGL249W  
 BNI1 YNL271C  
 YJR087W  
 MSC3 YLR219W  
 TRS65 YGR166W  
 DDC1 YPL194W  
 COG5 YNL051W  
 NAM2 YLR382C  
 MRPS12 YNR036C  
 NOT5 YPR072W  
 YOR008C-A  
 PLC1 YPL268W  
 PET8 YNL003C  
 SCS3 YGL126W  
 API2 YDR525W  
 MON2 YNL297C  
 RRD1 YIL153W  
 SCO1 YBR037C  
 SAP30 YMR263W  
 FPK1 YNR047W  
 PBI2 YNL015W  
 IRC21 YMR073C  
 PHO23 YNL097C  
 RXT2 YBR095C  
 SIR1 YKR101W  
 GAT1 YFL021W  
 DEP1 YAL013W  
 POL32 YJR043C  
 ATX1 YNL259C  
 YDR199W  
 BXI1 YNL305C  
 YKR073C  
 SIS2 YKR072C  
 RFM1 YOR279C  
 TAT2 YOL020W  
 CRH1 YGR189C  
 SAE2 YGL175C  
 PSD2 YGR170W  
 GTO1 YGR154C  
 PUB1 YNL016W  
 YJL068C  
 YFL034W  
 MAK32 YCR019W  
 SRO9 YCL037C  
 PUS6 YGR169C  
 YGR153W  
 MRPL23 YOR150W  
 PAU13 YHL046C  
 UBR1 YGR184C  
 MRPL27 YBR282W  
 VPS29 YHR012W  
 YTA7 YGR270W  
 SWI4 YER111C  
 HAC1 YFL031W  
 YDR431W  
 HHF1 YBR009C  
 RPL39 YJL189W  
 PBS2 YJL128C  
 HIR3 YJR140C  
 PMP3 YDR276C  
 PEX32 YBR168W  
 HOS1 YPR068C  
 RTT106 YNL206C  
 RLF2 YPR018W  
 YML101C-A  
 TPS1 YBR126C  
 UBP8 YMR223W  
 ASR1 YPR093C  
 MDM38 YOL027C  
 HIR2 YOR038C

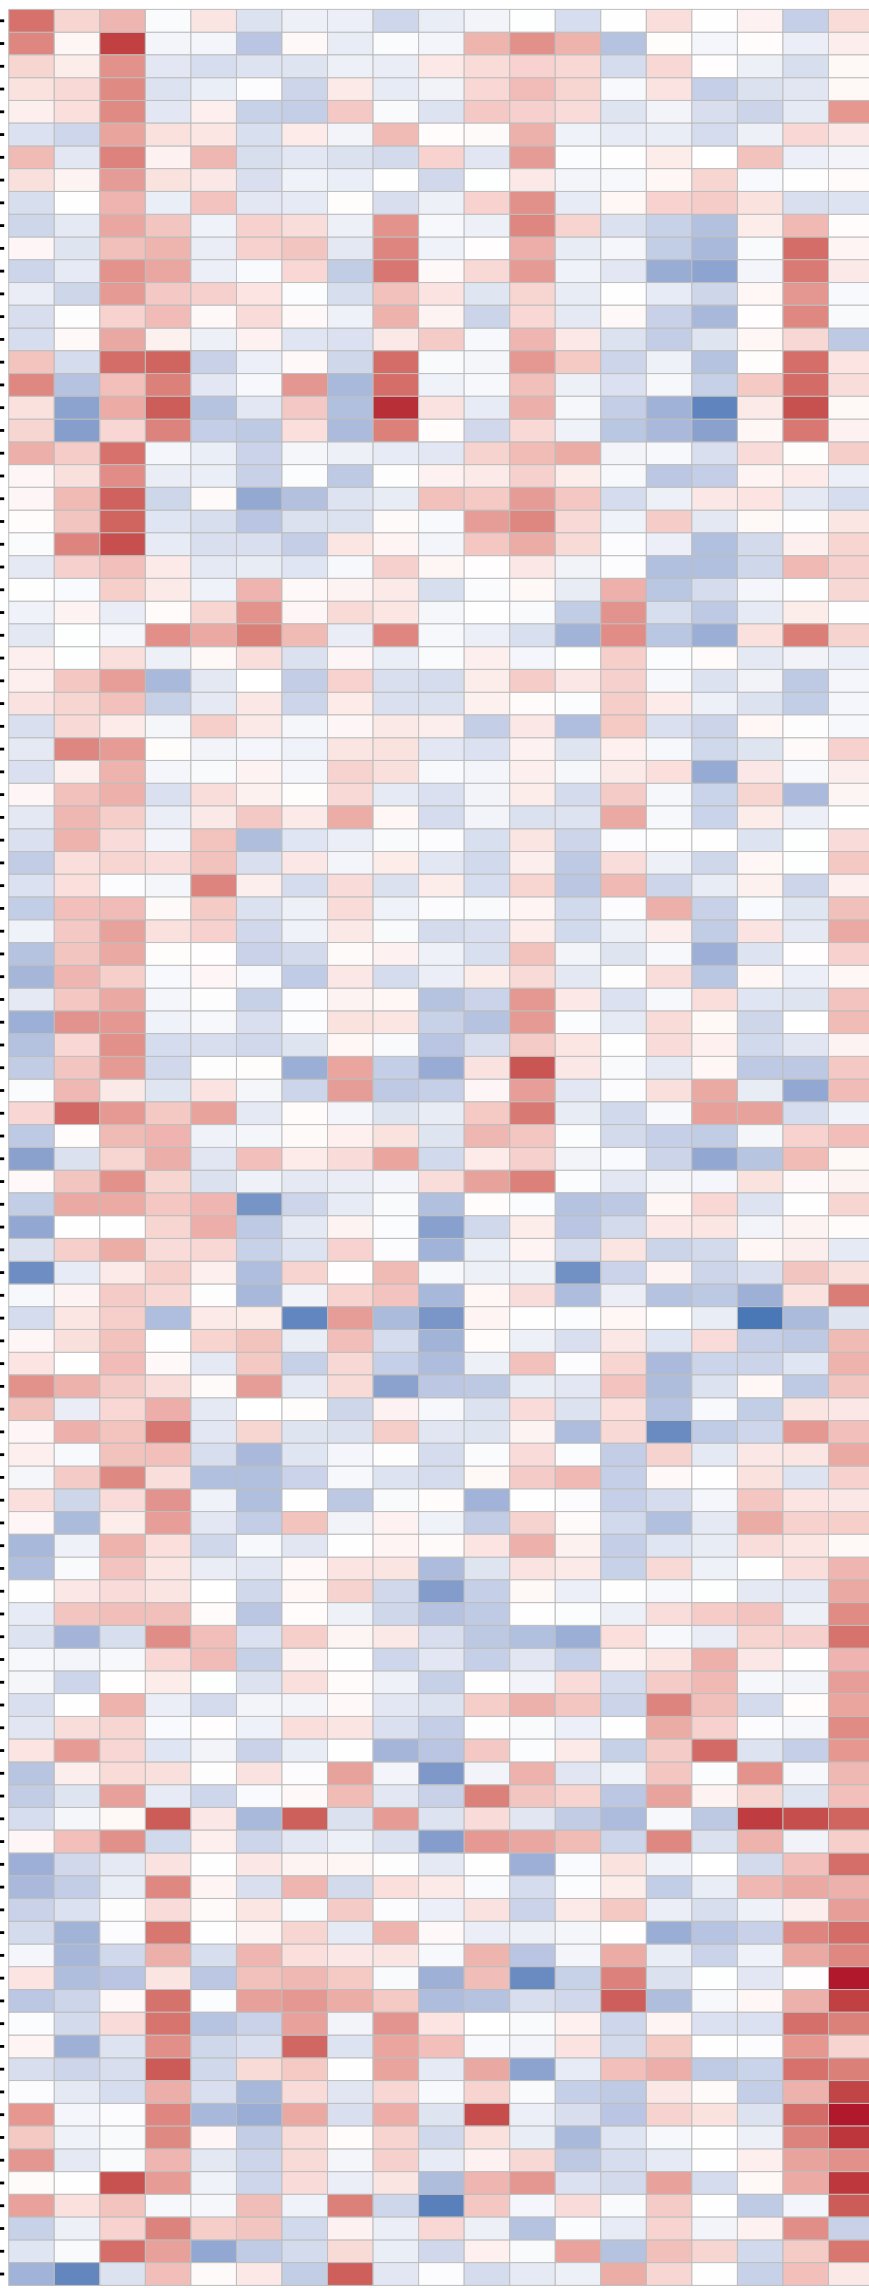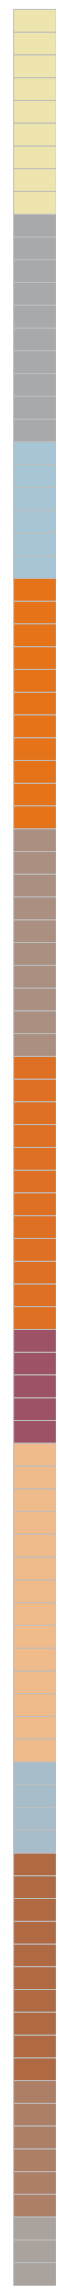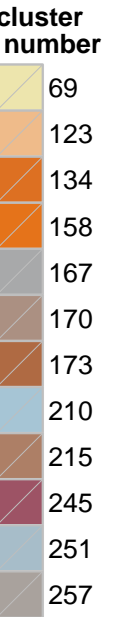

alanine -  
 aspartate -  
 glutamate -  
 phenylalanine -  
 glycine -  
 histidine -  
 isoleucine -  
 lysine -  
 leucine -  
 methionine -  
 asparagine -  
 proline -  
 glutamine -  
 arginine -  
 serine -  
 threonine -  
 valine -  
 tryptophan -  
 tyrosine -  
 cluster -

GPD2 YOL059W  
 YLR232W  
 BNA5 YLR231C  
 YCL076W  
 YDR290W  
 RTT103 YDR289C  
 MDM12 YOL009C  
 CTF4 YPR135W  
 MRC1 YCL061C  
 MAC1 YMR021C  
 SUM1 YDR310C  
 HXT17 YNR072W  
 BNA7 YDR428C  
 APS3 YJL024C  
 APL6 YGR261C  
 APL5 YPL195W  
 DGK1 YOR311C  
 APM3 YBR288C  
 DFG5 YMR238W  
 ERG2 YMR202W  
 YDR124W  
 NDE1 YMR145C  
 ZAP1 YJL056C  
 NRT1 YOR071C  
 GLO4 YOR040W  
 VPS36 YLR417W  
 PPQ1 YPL179W  
 SNF1 YDR477W  
 TIM8 YJR135W-A  
 PAR32 YDL173W  
 YDL172C  
 ELO2 YCR034W  
 YNL235C  
 MPC3 YGR243W  
 HDA1 YNL021W  
 XBP1 YIL101C  
 YER076C  
 TOK1 YJL093C  
 RSR1 YGR152C  
 VPS21 YOR089C  
 VPS8 YAL002W  
 INO1 YJL153C  
 EST1 YLR233C  
 IRS4 YKR019C  
 VPH1 YOR270C  
 NBP2 YDR162C  
 VID28 YIL017C  
 TPC1 YGR096W  
 ATG21 YPL100W  
 PPM1 YDR435C  
 ALF1 YNL148C  
 AIM46 YHR199C  
 APM2 YHL019C  
 DUR3 YHL016C  
 CST6 YIL036W  
 YIL028W  
 HO YDL227C  
 MSN1 YOL116W  
 RPL21B YPL079W  
 HOS4 YIL112W  
 SKY1 YMR216C  
 IKI3 YLR384C  
 KTI12 YKL110C  
 RPS21B YJL136C  
 PCL7 YIL050W  
 PUS9 YDL036C  
 SGF29 YCL010C  
 ZRT3 YKL175W  
 RGT1 YKL038W  
 CAC2 YML102W  
 CRD1 YDL142C  
 YBR139W  
 UBC4 YBR082C  
 IES1 YFL013C  
 TOS1 YBR162C  
 TRX1 YLR043C  
 SFL1 YOR140W  
 YOR139C  
 SSN3 YPL042C  
 MOD5 YOR274W  
 SLX9 YGR081C  
 TOM1 YDR457W  
 YML053C  
 YJR061W  
 YMC1 YPR058W  
 CYC1 YJR048W  
 PSY4 YBL046W  
 PPR1 YLR014C  
 PMS1 YNL082W  
 EHT1 YBR177C  
 MZM1 YDR493W  
 SGF11 YPL047W  
 SHE9 YDR393W  
 PTH1 YHR189W  
 CHD1 YER164W  
 AUS1 YOR011W  
 YGR045C  
 ODC2 YOR222W  
 SED1 YDR077W  
 YOR292C

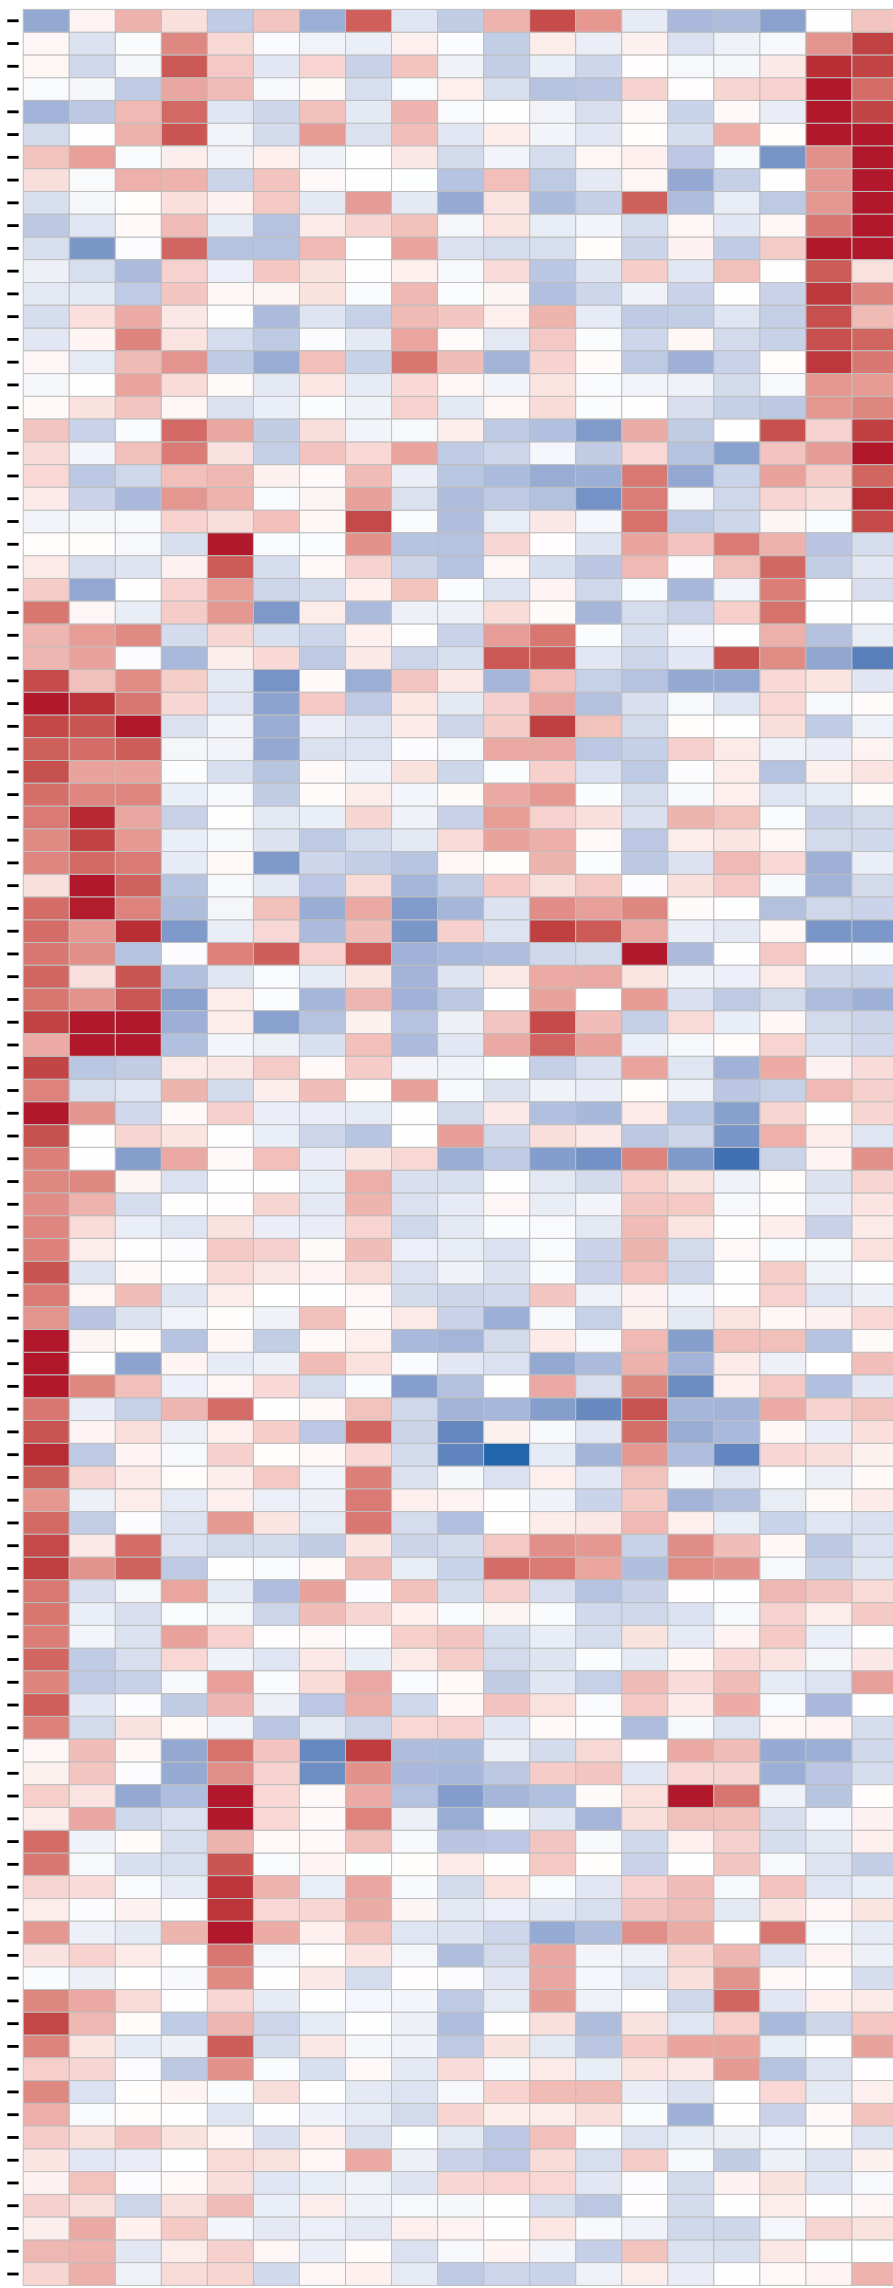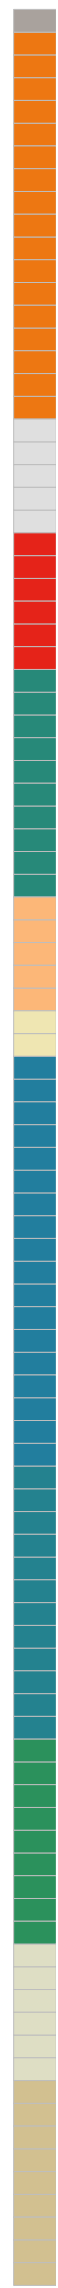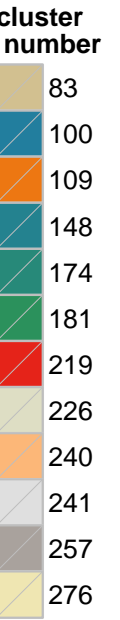

alanine -  
 aspartate -  
 glutamate -  
 phenylalanine -  
 glycine -  
 histidine -  
 isoleucine -  
 lysine -  
 leucine -  
 methionine -  
 asparagine -  
 proline -  
 glutamine -  
 arginine -  
 serine -  
 threonine -  
 valine -  
 tryptophan -  
 tyrosine -

cluster -

YPL197C  
 OXR1 YPL196W  
 PUS1 YPL212C  
 YIL077C  
 GRE3 YHR104W  
 PUT2 YHR037W  
 AZF1 YOR113W  
 HSC82 YMR186W  
 AIM18 YHR198C  
 YAP1801 YHR161C  
 KAR4 YCL055W  
 SAT4 YCR008W  
 SEY1 YOR165W  
 NOT3 YIL038C  
 PEX18 YHR160C  
 ANS1 YHR126C  
 SSP1 YHR184W  
 YIL029C  
 PDR18 YNR070W  
 CTM1 YHR109W  
 FIS1 YIL065C  
 STE7 YDL159W  
 DFG10 YIL049W  
 MNT4 YNR059W  
 ARN2 YHL047C  
 NAT5 YOR253W  
 TOM71 YHR117W  
 OPI11 YPR044C  
 EFM4 YIL064W  
 YCR016W  
 SBE22 YHR103W  
 SRO77 YBL106C  
 YHL042W  
 YAP3 YHL009C  
 PHO91 YNR013C  
 GIC1 YHR061C  
 YHL037C  
 ALE1 YOR175C  
 PKP1 YIL042C  
 RPL18B YNL301C  
 YNL190W  
 ARN1 YHL040C  
 MUP3 YHL036W  
 WSC4 YHL028W  
 SPO11 YHL022C  
 UNG1 YML021C  
 COA3 YJL062W-A  
 ALG3 YBL082C  
 YMR158W-B  
 SPO22 YIL073C  
 PAI3 YMR174C  
 YAR029W  
 NIP100 YPL174C  
 GAS3 YMR215W  
 STE20 YHL007C  
 MRPL49 YJL096W  
 MSS11 YMR164C  
 RIP1 YEL024W  
 CRG1 YHR209W  
 CBP2 YHL038C  
 YDL032W  
 OMS1 YDR316W  
 FET3 YMR058W  
 MLC2 YPR188C  
 ATG13 YPR185W  
 CBS1 YDL069C  
 RCF1 YML030W  
 MRPL28 YDR462W  
 YLR124W  
 PTC7 YHR076W  
 SOD2 YHR008C  
 CTF18 YMR078C  
 NDT80 YHR124W  
 NEL1 YHR035W  
 SAG1 YJR004C  
 COR1 YBL045C  
 SHY1 YGR112W  
 PET54 YGR222W  
 PET122 YER153C  
 COX19 YLL018C-A  
 OGG1 YML060W  
 NQM1 YGR043C  
 YHR130C  
 MSS51 YLR203C  
 CBS2 YDR197W  
 COX9 YDL067C  
 COQ5 YML110C  
 CAT5 YOR125C  
 CBP4 YGR174C  
 YDR230W  
 COX11 YPL132W  
 MSS2 YDL107W  
 CYT2 YKL087C  
 CBP1 YJL209W  
 COX18 YGR062C  
 SOM1 YEL059C-A  
 QCR8 YJL166W  
 QCR6 YFR033C  
 COX12 YLR038C  
 COQ10 YOL008W

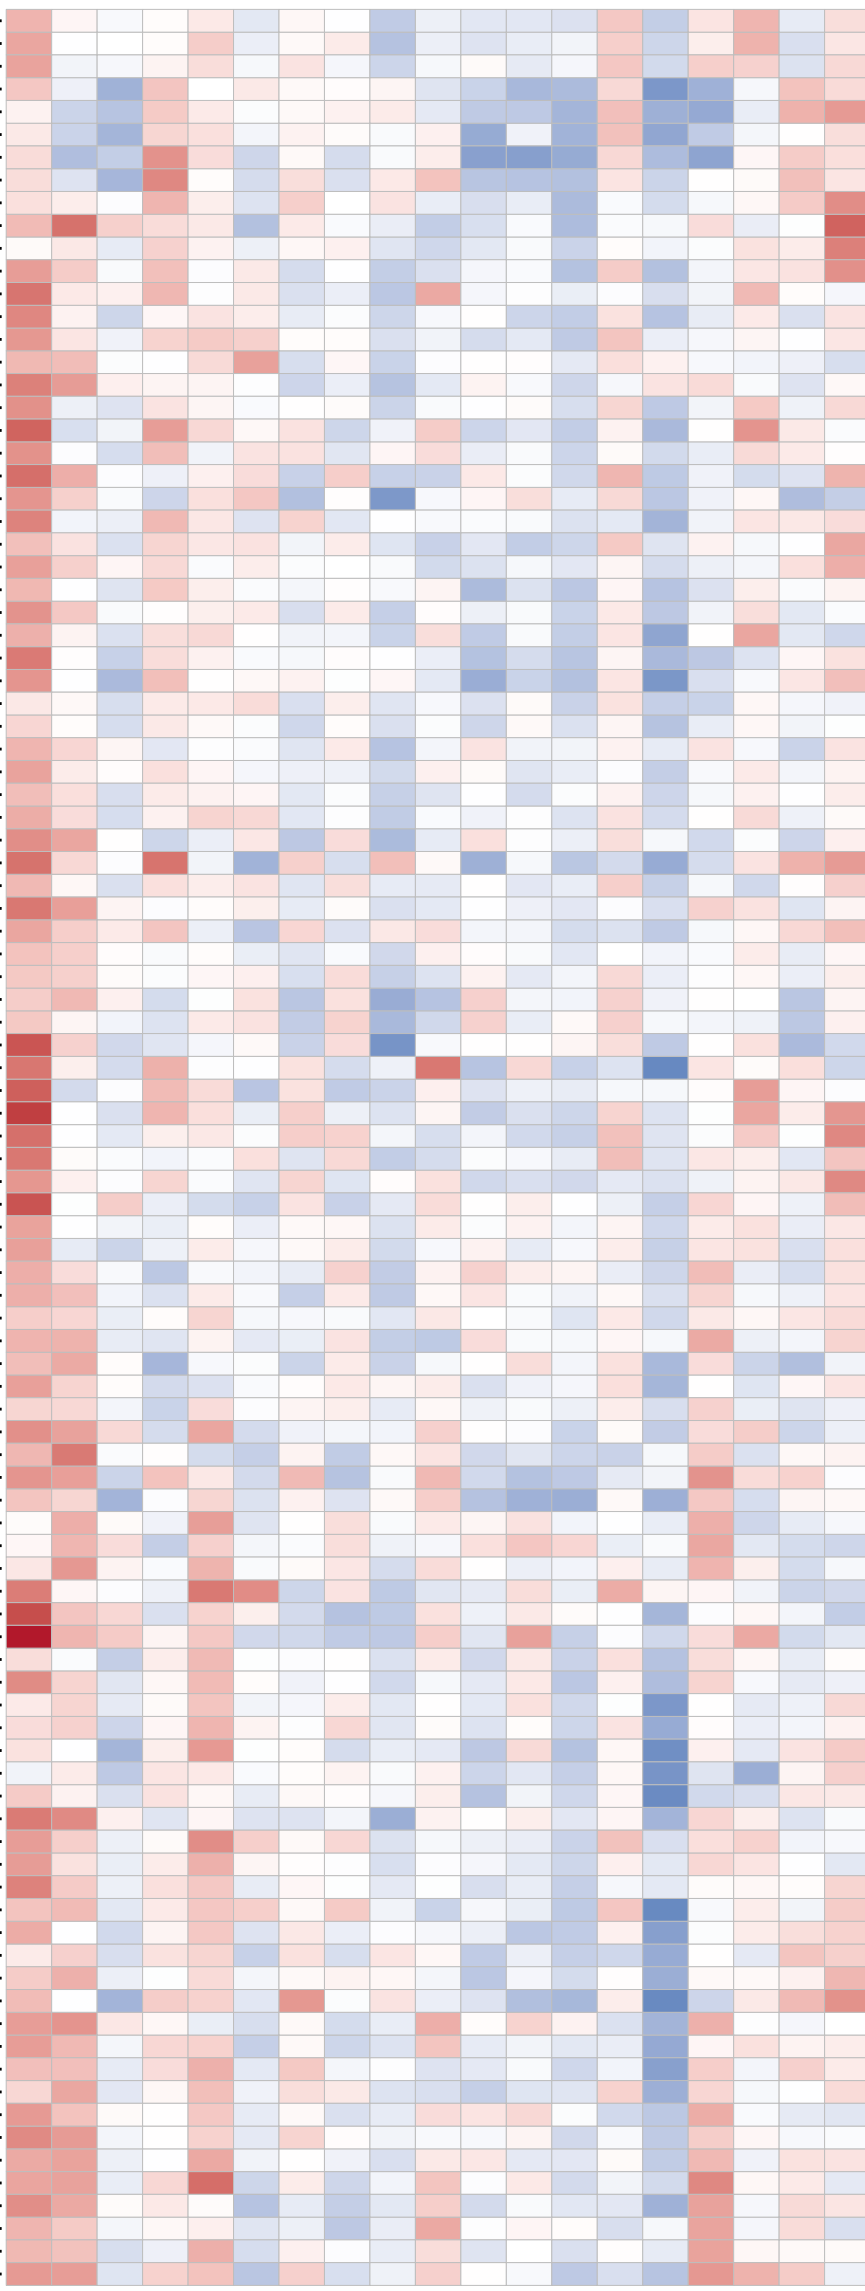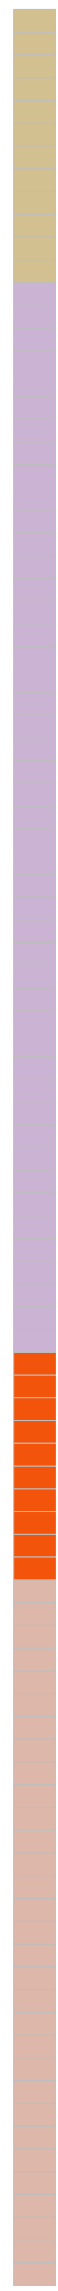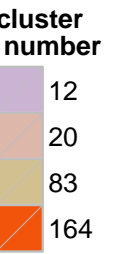

alanine -  
 aspartate -  
 glutamate -  
 phenylalanine -  
 glycine -  
 histidine -  
 isoleucine -  
 lysine -  
 leucine -  
 methionine -  
 asparagine -  
 proline -  
 glutamine -  
 arginine -  
 serine -  
 threonine -  
 valine -  
 tryptophan -  
 tyrosine -  
 cluster -



UBX4 YMR067C  
 CAF4 YKR036C  
 YHL008C  
 QCR2 YPR191W  
 MLH1 YMR167W  
 MLS1 YNL117W  
 MRPL1 YDR116C  
 PSP2 YML017W  
 APM1 YPL259C  
 YDL068W  
 NAT1 YDL040C  
 COQ3 YOL096C  
 YLR202C  
 ATP17 YDR377W  
 YMR102C  
 YLL006W-A  
 GID8 YMR135C  
 YAL044W-A  
 MFT1 YML062C  
 YIL108W  
 YIL100W  
 ARO3 YDR035W  
 AIF1 YNR074C  
 YKR078W  
 SGA1 YIL099W  
 BIO2 YGR286C  
 YOR1 YGR281W  
 YGR283C  
 YKL162C-A  
 DAL2 YIR029W  
 CPA1 YOR303W  
 GLC8 YMR311C  
 YHR140W  
 GRX7 YBR014C  
 EST3 YIL009C-A  
 YNL057W  
 BGL2 YGR282C  
 YNL058C  
 YBR071W  
 COA2 YPL189C-A  
 GAL1 YBR020W  
 RSM24 YDR175C  
 CYC3 YAL039C  
 PET309 YLR067C  
 FET4 YMR319C  
 DPH1 YIL103W  
 ABF2 YMR072W  
 ATP19 YOL077W-A  
 YML054C-A  
 MHF1 YOL086W-A  
 YPR108W-A  
 RAD10 YML095C  
 YOL107W  
 YMR315W  
 YOL097W-A  
 TGL3 YMR313C  
 MUM2 YBR057C  
 YPL119C-A  
 YCR006C  
 CIT2 YCR005C  
 GIP3 YPL137C  
 YHL045W  
 YPL038W-A  
 YMR272W-B  
 COQ8 YGL119W  
 TOM7 YNL070W  
 RPL19B YBL027W  
 ALO1 YML086C  
 MDM35 YKL053C-A  
 TAN1 YGL232W  
 HUT1 YPL244C  
 ATG34 YOL083W  
 SAM4 YPL273W  
 GRE1 YPL223C  
 MGA2 YIR033W  
 ATG7 YHR171W  
 HST1 YOL068C  
 YBL059W  
 YLR460C  
 YBL028C  
 XYL2 YLR070C  
 PKP2 YGL059W  
 MGR1 YCL044C  
 YHR050W-A  
 GEP7 YGL057C  
 RTC6 YPL183W-A  
 TDA9 YML081W  
 MGR3 YMR115W  
 UBP2 YOR124C  
 GAL80 YML051W  
 YLR123C  
 YKR104W  
 CLU1 YMR012W  
 ORM2 YLR350W  
 MSH2 YOL090W  
 SIL1 YOL031C  
 YFL012W-A  
 CYM1 YDR430C  
 IES4 YOR189W  
 YGL149W

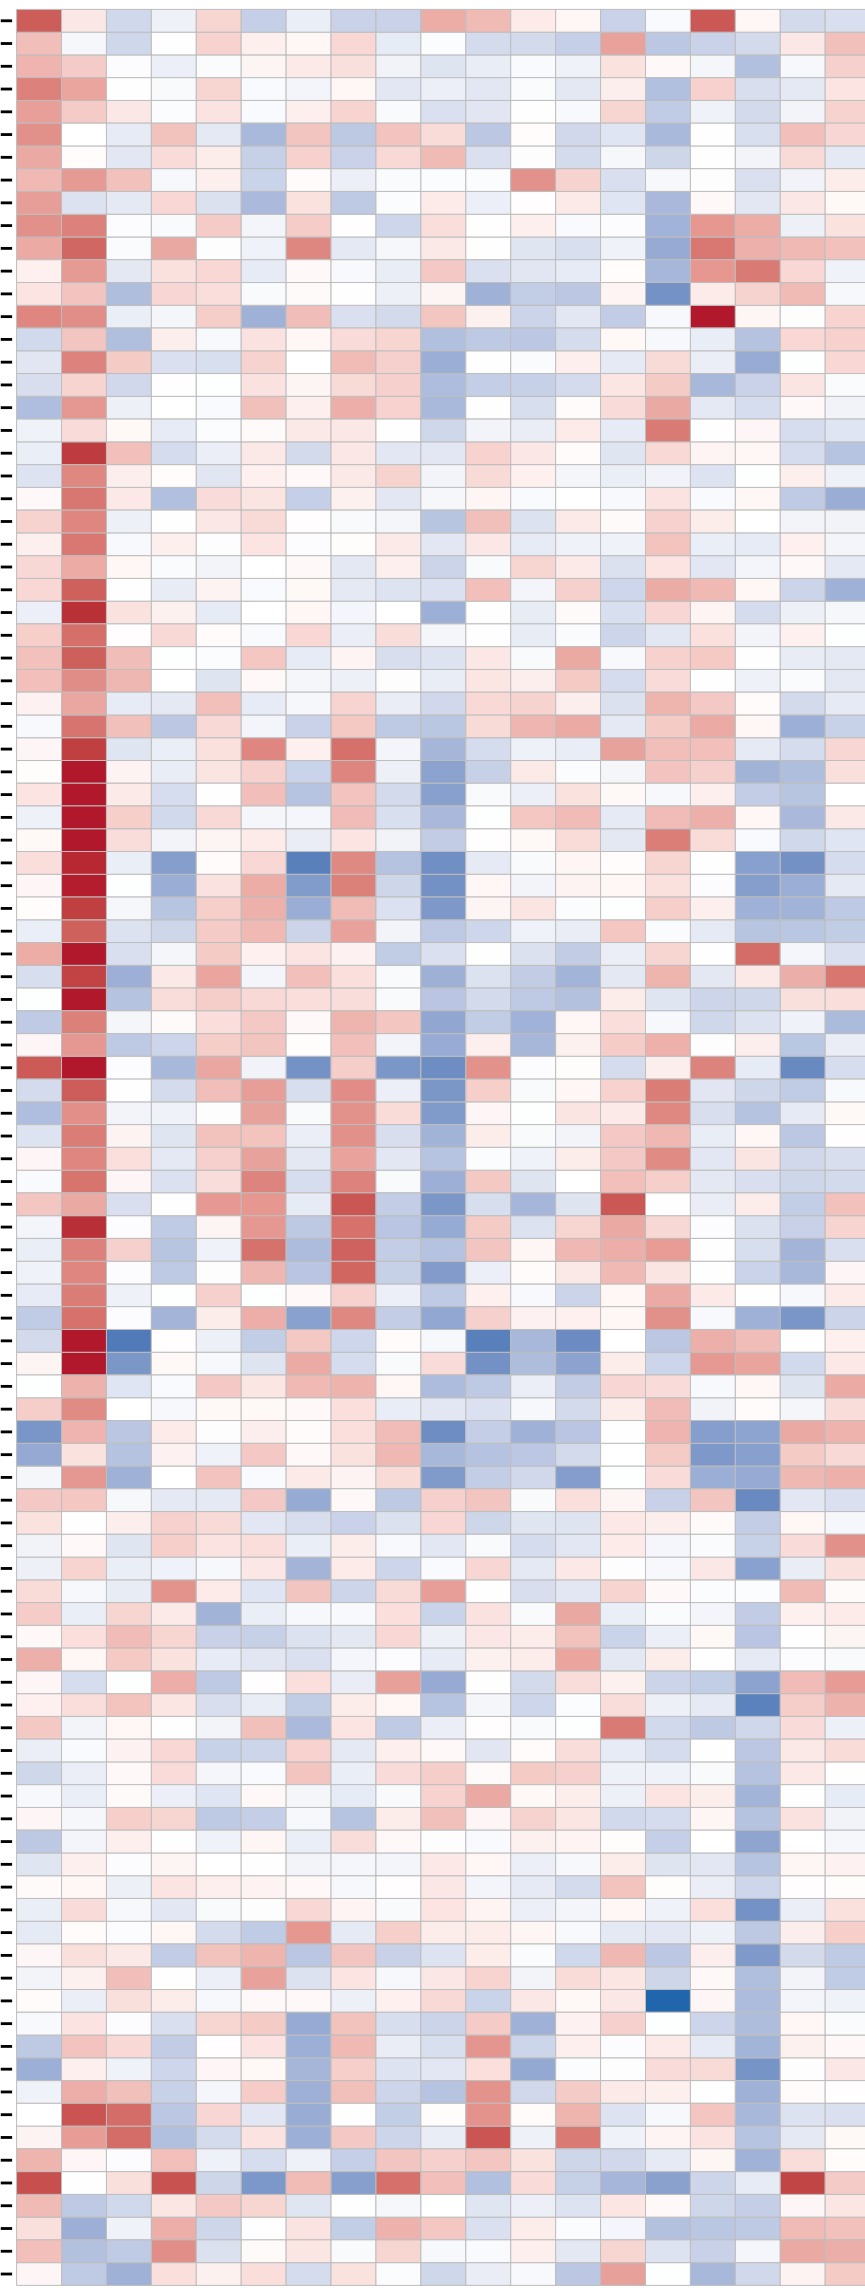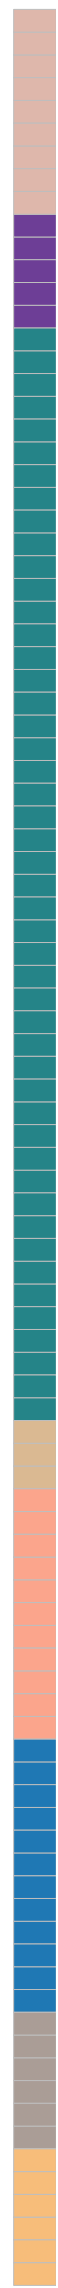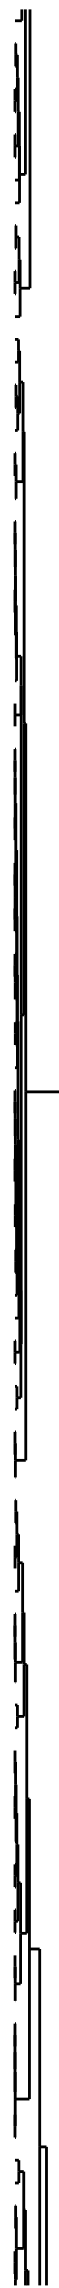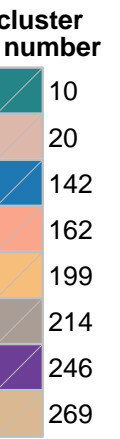

alanine -  
 aspartate -  
 glutamate -  
 phenylalanine -  
 glycine -  
 histidine -  
 isoleucine -  
 lysine -  
 leucine -  
 methionine -  
 asparagine -  
 proline -  
 glutamine -  
 arginine -  
 serine -  
 threonine -  
 valine -  
 tryptophan -  
 tyrosine -  
 cluster -

IES5 YER092W  
 NOP12 YOL041C  
 YGL072C  
 SPT21 YMR179W  
 SPT4 YGR063C  
 SSN2 YDR443C  
 BRE5 YNR051C  
 RPS6B YBR181C  
 YNR048W  
 MIX23 YBL107C  
 ALG12 YNR030W  
 FYV10 YIL097W  
 BMT5 YIL096C  
 YBR230W-A  
 TYW1 YPL207W  
 PLP1 YDR183W  
 YLR294C  
 IMH1 YLR309C  
 SAS4 YDR181C  
 YCP4 YCR004C  
 MSS1 YMR023C  
 YML084W  
 SPA2 YLL021W  
 SML1 YML058W  
 YML037C  
 MPD1 YOR288C  
 OST6 YML019W  
 GIS4 YML006C  
 BUD17 YNR027W  
 RTT102 YGR275W  
 NHP6A YPR052C  
 MAK3 YPR051W  
 ISU2 YOR226C  
 NST1 YNL091W  
 YLR194C  
 MBP1 YDL056W  
 RMD5 YDR255C  
 VID30 YGL227W  
 RPL38 YLR325C  
 NAP1 YKR048C  
 YKR047W  
 PEX17 YNL214W  
 BUB1 YGR188C  
 IST3 YIR005W  
 NDE2 YDL085W  
 NIS1 YNL078W  
 YLR235C  
 YDR391C  
 AIM4 YBR194W  
 GIS3 YLR094C  
 YGL101W  
 PBP2 YBR233W  
 MIH1 YMR036C  
 PEX29 YDR479C  
 RGI2 YIL057C  
 YKE4 YIL023C  
 NNF2 YGR089W  
 LRE1 YCL051W  
 YIL055C  
 CDA2 YLR308W  
 EFT1 YOR133W  
 DGR2 YKL121W  
 RPI1 YIL119C  
 YOR097C  
 SST2 YLR452C  
 SPG5 YMR191W  
 YGL109W  
 YJL043W  
 DOS2 YDR068W  
 RIB1 YBL033C  
 IRC16 YPR038W  
 UFO1 YML088W  
 RPL26B YGR034W  
 IAH1 YOR126C  
 MAK31 YCR020C-A  
 AIM11 YER093C-A  
 SEC72 YLR292C  
 UME6 YDR207C  
 RPL42A YNL162W  
 RPS4A YJR145C  
 KTR7 YIL085C  
 TRR2 YHR106W  
 YLR125W  
 TWF1 YGR080W  
 PAN6 YIL145C  
 CPR2 YHR057C  
 YIL014C-A  
 DAP2 YHR028C  
 DBF20 YPR111W  
 YJR039W  
 HHO1 YPL127C  
 FSH2 YMR222C  
 COQ2 YNR041C  
 YDR524W-C  
 EMC2 YJR088C  
 FRA1 YLL029W  
 WTM1 YOR230W  
 TGL4 YKR089C  
 BUD4 YJR092W  
 NHP10 YDL002C

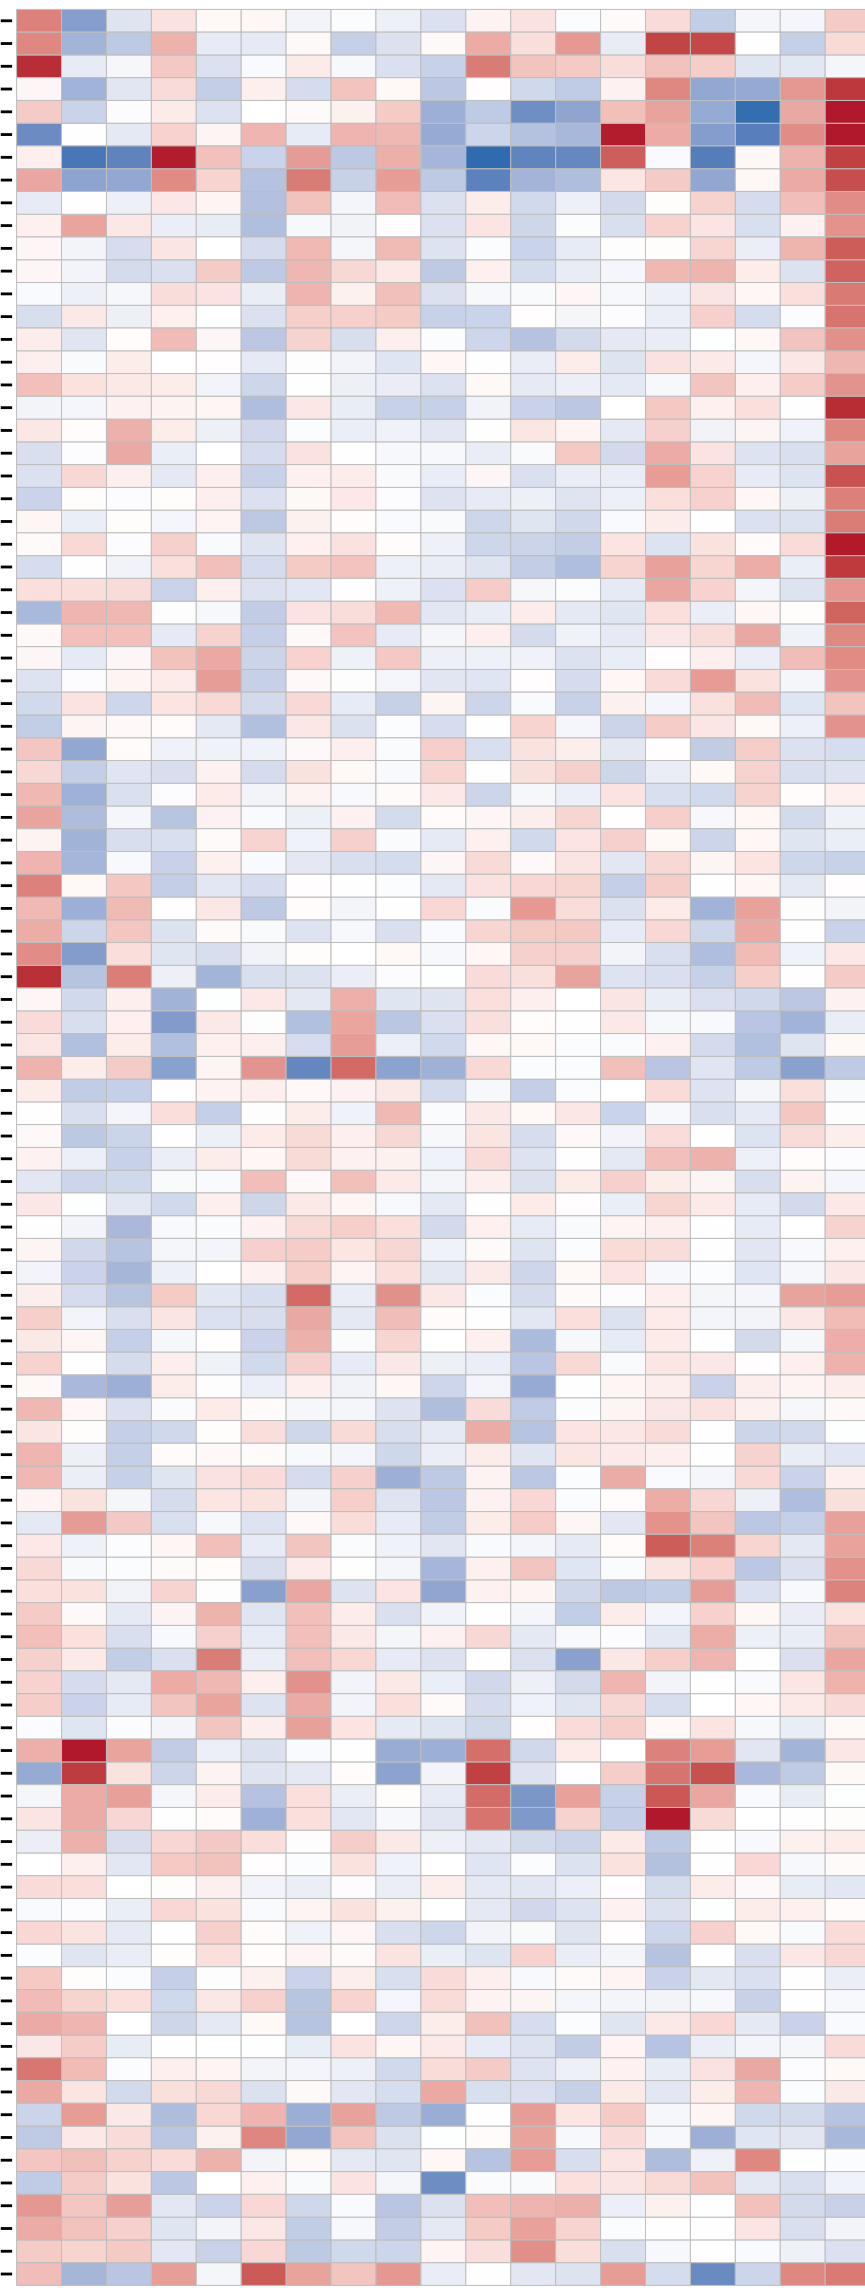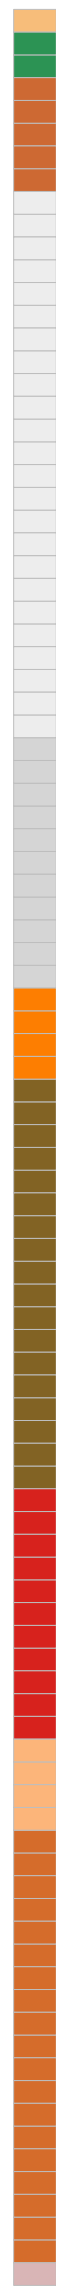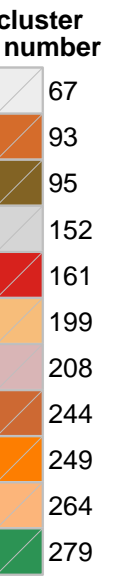

alanine -  
 aspartate -  
 glutamate -  
 phenylalanine -  
 glycine -  
 histidine -  
 isoleucine -  
 lysine -  
 leucine -  
 methionine -  
 asparagine -  
 proline -  
 glutamine -  
 arginine -  
 serine -  
 threonine -  
 valine -  
 tryptophan -  
 tyrosine -  
 cluster -

FES1 YBR101C  
 YOR345C  
 YHR086W-A  
 ATG29 YPL166W  
 SXM1 YDR395W  
 JNM1 YMR294W  
 GAT4 YIR013C  
 BOI1 YBL085W  
 FAA3 YIL009W  
 YIL161W  
 SEC66 YBR171W  
 MPH1 YIR002C  
 YBL100C  
 PGU1 YJR153W  
 VPS55 YJR044C  
 ENV11 YGR071C  
 JID1 YPR061C  
 TMA19 YKL056C  
 DPH6 YLR143W  
 MDM30 YLR368W  
 YPL261C  
 SMF2 YHR050W  
 YMR209C  
 GOR1 YNL274C  
 BNA2 YJR078W  
 FAT3 YKL187C  
 INP53 YOR109W  
 DMA1 YHR115C  
 AIM44 YPL158C  
 COQ11 YLR290C  
 YMR086C-A  
 YDL183C  
 PUT1 YLR142W  
 RAD4 YER162C  
 YDR194W-A  
 RPL43B YJR094W-A  
 VHS2 YIL135C  
 SIM1 YIL123W  
 YPL205C  
 SRP40 YKR092C  
 RPS12 YOR369C  
 YCR095W-A  
 ATP10 YLR393W  
 CCE1 YKL011C  
 TDA3 YHR009C  
 SAP190 YKR028W  
 DAL80 YKR034W  
 IMP2 YIL154C  
 MNE1 YOR350C  
 FPR4 YLR449W  
 HOP2 YGL033W  
 AAC3 YBR085W  
 YLR281C  
 NUC1 YJL208C  
 YER084W  
 VTS1 YOR359W  
 RPN10 YHR200W  
 PET191 YJR034W  
 VTC2 YFL004W  
 VPS68 YOL129W  
 YSP2 YDR326C  
 YLR345W  
 YIR021W-A  
 FAR11 YNL127W  
 VTC4 YJL012C  
 ECM14 YHR132C  
 VTC1 YER072W  
 CIT1 YNR001C  
 RAV2 YDR202C  
 MIP6 YHR015W  
 LSM7 YNL147W  
 UBA4 YHR111W  
 RPL23A YBL087C  
 YGR012W  
 PFA5 YDR459C  
 VTA1 YLR181C  
 MVB12 YGR206W  
 YPR174C  
 AHT1 YHR093W  
 NHX1 YDR456W  
 YDR455C  
 BOI2 YER114C  
 ALG6 YOR002W  
 YMR007W  
 YKR051W  
 SRC1 YML034W  
 YAL056C-A  
 YJR011C  
 APE3 YBR286W  
 SOK1 YDR006C  
 CIR2 YOR356W  
 GUT1 YHL032C  
 HMT1 YBR034C  
 RAM1 YDL090C  
 CYB5 YNL111C  
 NMD2 YHR077C  
 COX15 YER141W  
 MDL2 YPL270W  
 ECM18 YDR125C  
 PNP1 YLR209C

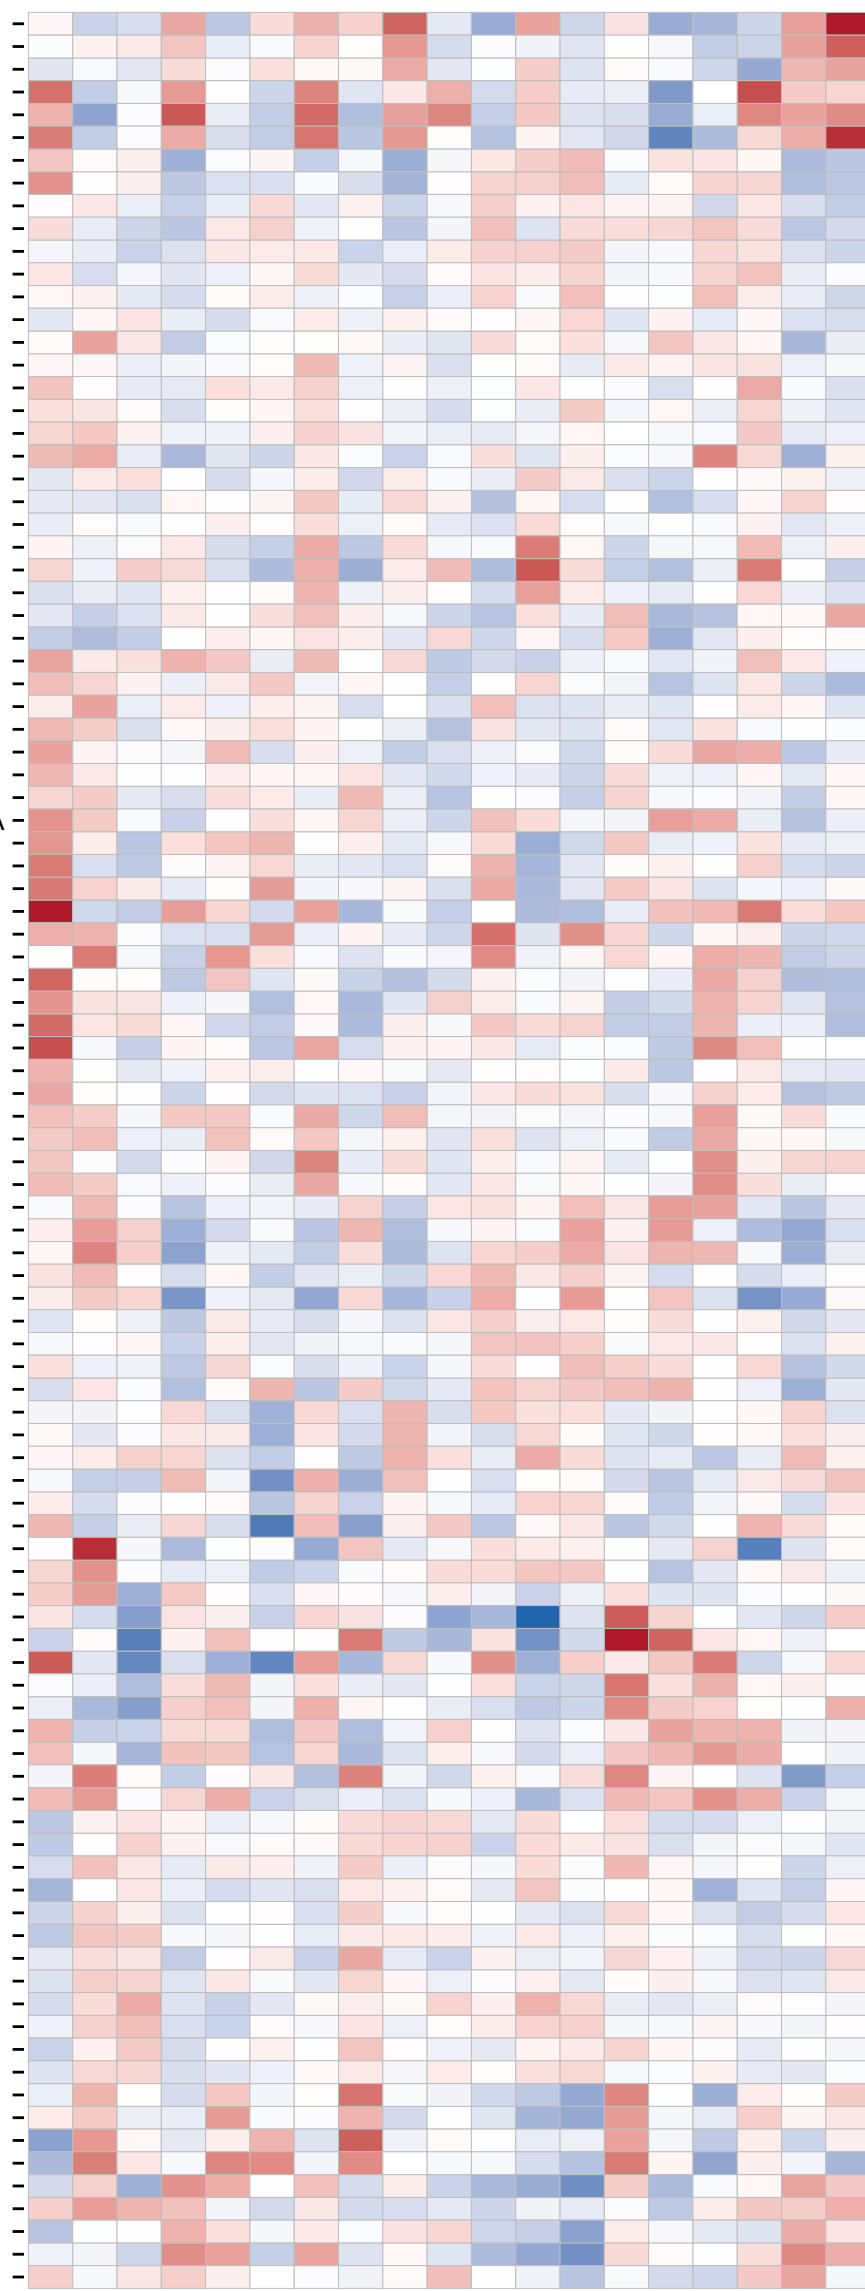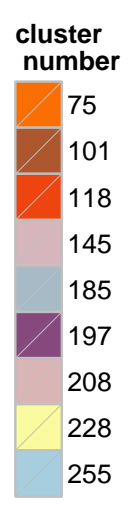

alanine -  
 aspartate -  
 glutamate -  
 phenylalanine -  
 glycine -  
 histidine -  
 isoleucine -  
 lysine -  
 leucine -  
 methionine -  
 asparagine -  
 proline -  
 glutamine -  
 arginine -  
 serine -  
 threonine -  
 valine -  
 tryptophan -  
 tyrosine -  
 cluster -

YJL107C  
 HMX1 YLR205C  
 APN2 YBL019W  
 YGL185C  
 MRN1 YPL184C  
 GET3 YDL100C  
 SUL2 YLR092W  
 RGT2 YDL138W  
 GDS1 YOR355W  
 YSW1 YBR148W  
 YMR052C-A  
 FAR8 YMR029C  
 LHP1 YDL051W  
 YDL050C  
 SLC1 YDL052C  
 PER1 YCR044C  
 STB1 YNL309W  
 CAT8 YMR280C  
 EMP65 YER140W  
 SNO1 YMR095C  
 NMA1 YLR328W  
 DIP5 YPL265W  
 BCK2 YER167W  
 ERD1 YDR414C  
 STE18 YJR086W  
 ACM1 YPL267W  
 YOR277C  
 NBA1 YOL070C  
 RGD1 YBR260C  
 NDL1 YLR254C  
 LAA1 YJL207C  
 FAR7 YFR008W  
 YDR417C  
 ODC1 YPL134C  
 PFS1 YHR185C  
 YPR053C  
 GDA1 YEL042W  
 SLG1 YOR008C  
 ECM25 YJL201W  
 MKS1 YNL076W  
 UGA2 YBR006W  
 PUF3 YLL013C  
 RIF1 YBR275C  
 KIN3 YAR018C  
 FAA1 YOR317W  
 YMR099C  
 FUN30 YAL019W  
 SRL4 YPL033C  
 ICP55 YER078C  
 OPY1 YBR129C  
 SUR2 YDR297W  
 BNA1 YJR025C  
 MPO1 YGL010W  
 ENO1 YGR254W  
 YCR087W  
 ACF2 YLR144C  
 SDH7 YDR511W  
 YAP6 YDR259C  
 QCR7 YDR529C  
 HER1 YOR227W  
 SAM3 YPL274W  
 TDP1 YBR223C  
 YMR027W  
 YBR062C  
 DIA1 YMR316W  
 SQS1 YNL224C  
 MLP1 YKR095W  
 YBR099C  
 ESL2 YKR096W  
 DYN3 YMR299C  
 PMP2 YEL017C-A  
 SMA1 YPL027W  
 PUG1 YER185W  
 DFG16 YOR030W  
 IST1 YNL265C  
 PDR17 YNL264C  
 YCK3 YER123W  
 RBD2 YPL246C  
 HOL1 YNR055C  
 RPL33B YOR234C  
 RPL22A YLR061W  
 YOR263C  
 DXO1 YDR370C  
 TMA16 YOR252W  
 RAD61 YDR014W  
 FSH3 YOR280C  
 STE4 YOR212W  
 LRG1 YDL240W  
 GPA1 YHR005C  
 RAD24 YER173W  
 ADK2 YER170W  
 RNH203 YLR154C  
 YRB30 YGL164C  
 YER121W  
 CUP2 YGL166W  
 YGL165C  
 SHH4 YLR164W  
 MNR2 YKL064W  
 CAF20 YOR276W  
 YET2 YMR040W

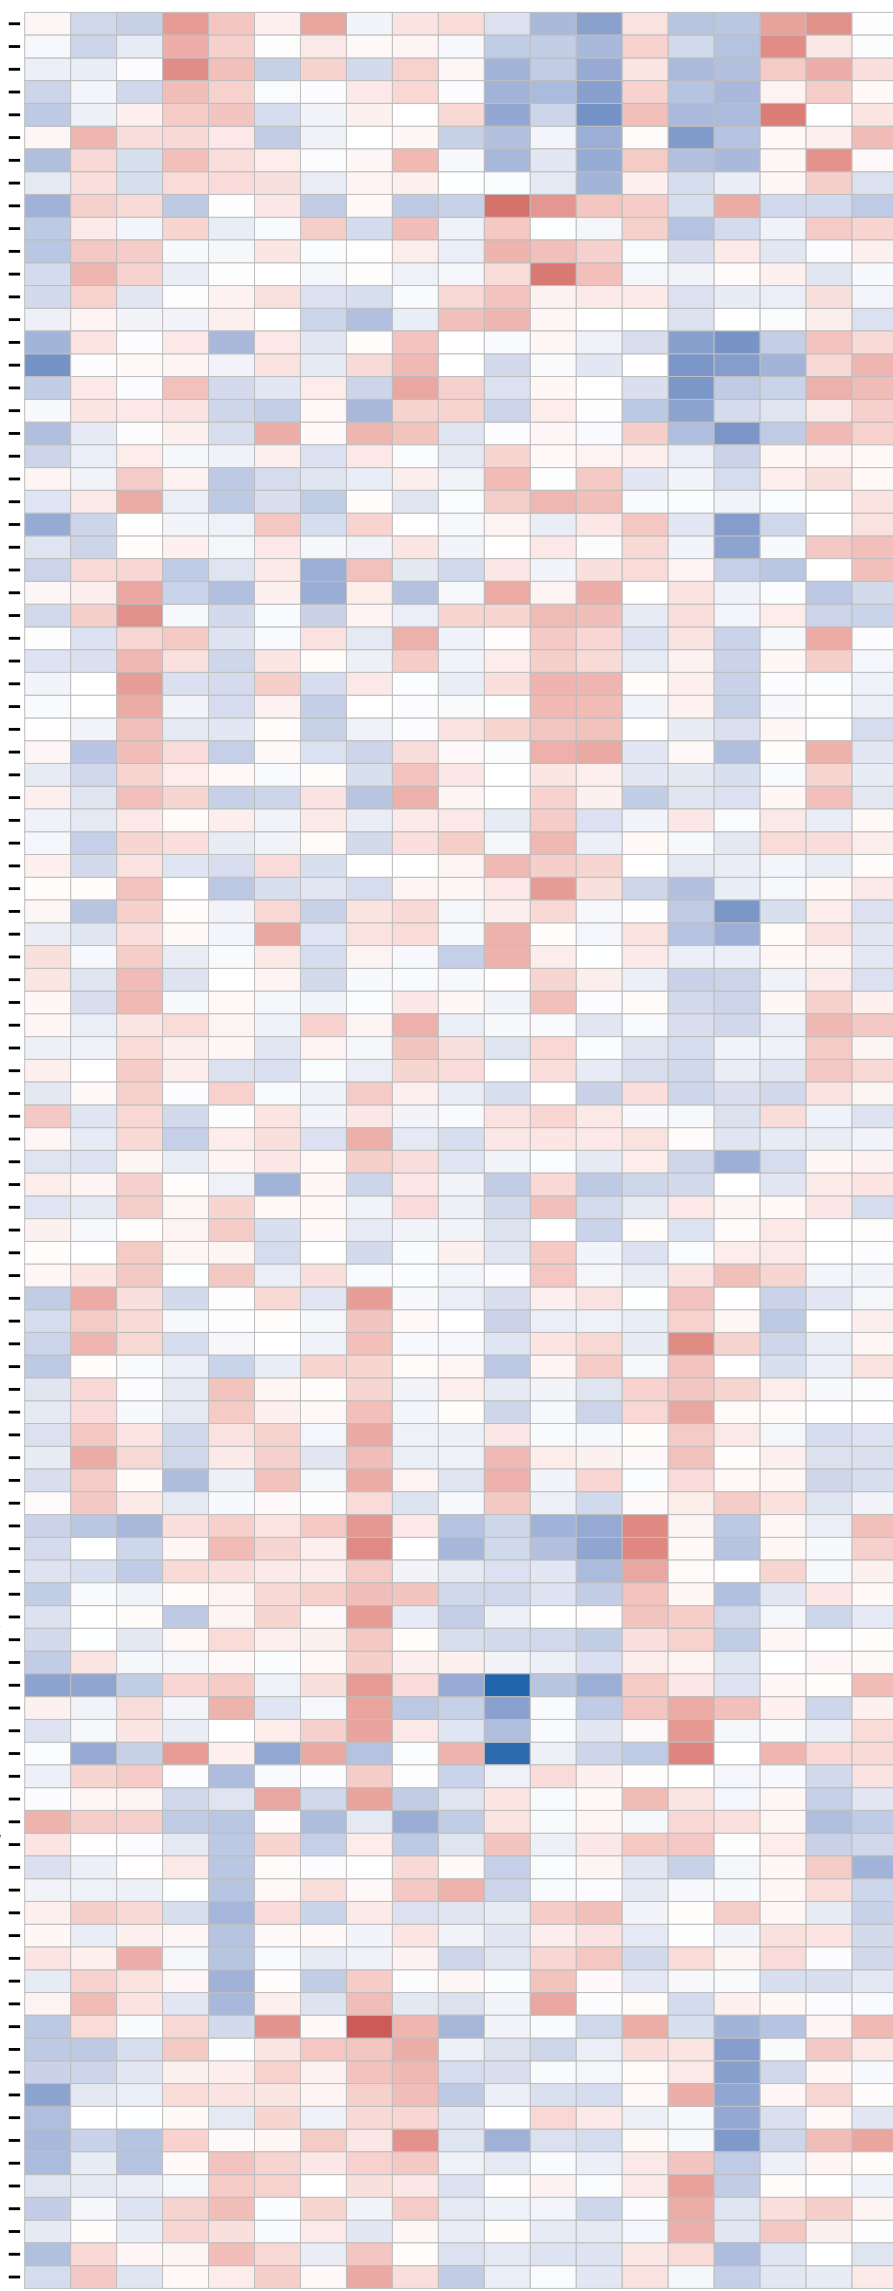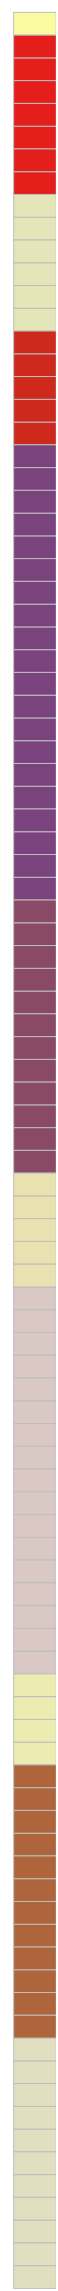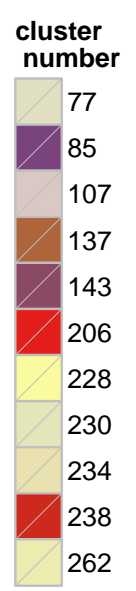

alanine -  
 aspartate -  
 glutamate -  
 phenylalanine -  
 glycine -  
 histidine -  
 isoleucine -  
 lysine -  
 leucine -  
 methionine -  
 asparagine -  
 proline -  
 glutamine -  
 arginine -  
 serine -  
 threonine -  
 valine -  
 tryptophan -  
 tyrosine -  
 cluster -

FLC3 YGL139W  
 PCL10 YGL134W  
 PMA2 YPL036W  
 YPL034W  
 VHS1 YDR247W  
 AIM2 YAL049C  
 LSC2 YGR244C  
 YPK2 YMR104C  
 MRX10 YDR282C  
 DPP1 YDR284C  
 STM1 YLR150W  
 RPL24B YGR148C  
 RPL41A YDL184C  
 AIM3 YBR108W  
 SPO1 YNL012W  
 CPT1 YNL130C  
 ATP2 YJR121W  
 DDR2 YOL052C-A  
 AAH1 YNL141W  
 MID2 YLR332W  
 YBR027C  
 ACE2 YLR131C  
 YCF1 YDR135C  
 SKG1 YKR100C  
 YML007C-A  
 CBP6 YBR120C  
 DMA2 YNL116W  
 YMR316C-B  
 TPI1 YDR050C  
 SLM1 YIL105C  
 YDR179W-A  
 ANR2 YKL047W  
 YJR142W  
 EAF1 YDR359C  
 YDR003W-A  
 YDL011C  
 YGR121W-A  
 YBR196C-B  
 MTL1 YGR023W  
 CCC1 YLR220W  
 UBP16 YPL072W  
 YPL071C  
 YBR200W-A  
 POM33 YLL023C  
 SOD1 YJR104C  
 KIN1 YDR122W  
 IPT1 YDR072C  
 YOR248W  
 AAD4 YDL243C  
 ICS2 YBR157C  
 ARA1 YBR149W  
 SEI1 YLR404W  
 YMR245W  
 YGR139W  
 YAR028W  
 GRX8 YLR364W  
 BOP2 YLR267W  
 YLR271W  
 YLR283W  
 PHM8 YER037W  
 CKA1 YIL035C  
 YBR090C  
 YDL071C  
 YGL138C  
 PEX31 YGR004W  
 MDG1 YNL173C  
 IGO1 YNL157W  
 ATO3 YDR384C  
 SUR1 YPL057C  
 ARO10 YDR380W  
 NVJ2 YPR091C  
 HST3 YOR025W  
 ASE1 YOR058C  
 EDC3 YEL015W  
 SIT1 YEL065W  
 YDR433W  
 DSE3 YOR264W  
 LDB7 YBL006C  
 CSM1 YCR086W  
 ROX1 YPR065W  
 MRPL8 YJL063C  
 MPM1 YJL066C  
 YPT11 YNL304W  
 YNL303W  
 NCE101 YJL205C  
 BDH1 YAL060W  
 YNL011C  
 RPS14B YJL191W  
 LOH1 YJL038C  
 YNL013C  
 PHO86 YJL117W  
 YJL171C  
 EFM2 YBR271W  
 NCA2 YPR155C  
 SFH5 YJL145W  
 KIN2 YLR096W  
 YDR193W  
 TRM82 YDR165W  
 GAS5 YOL030W  
 IMA5 YJL216C

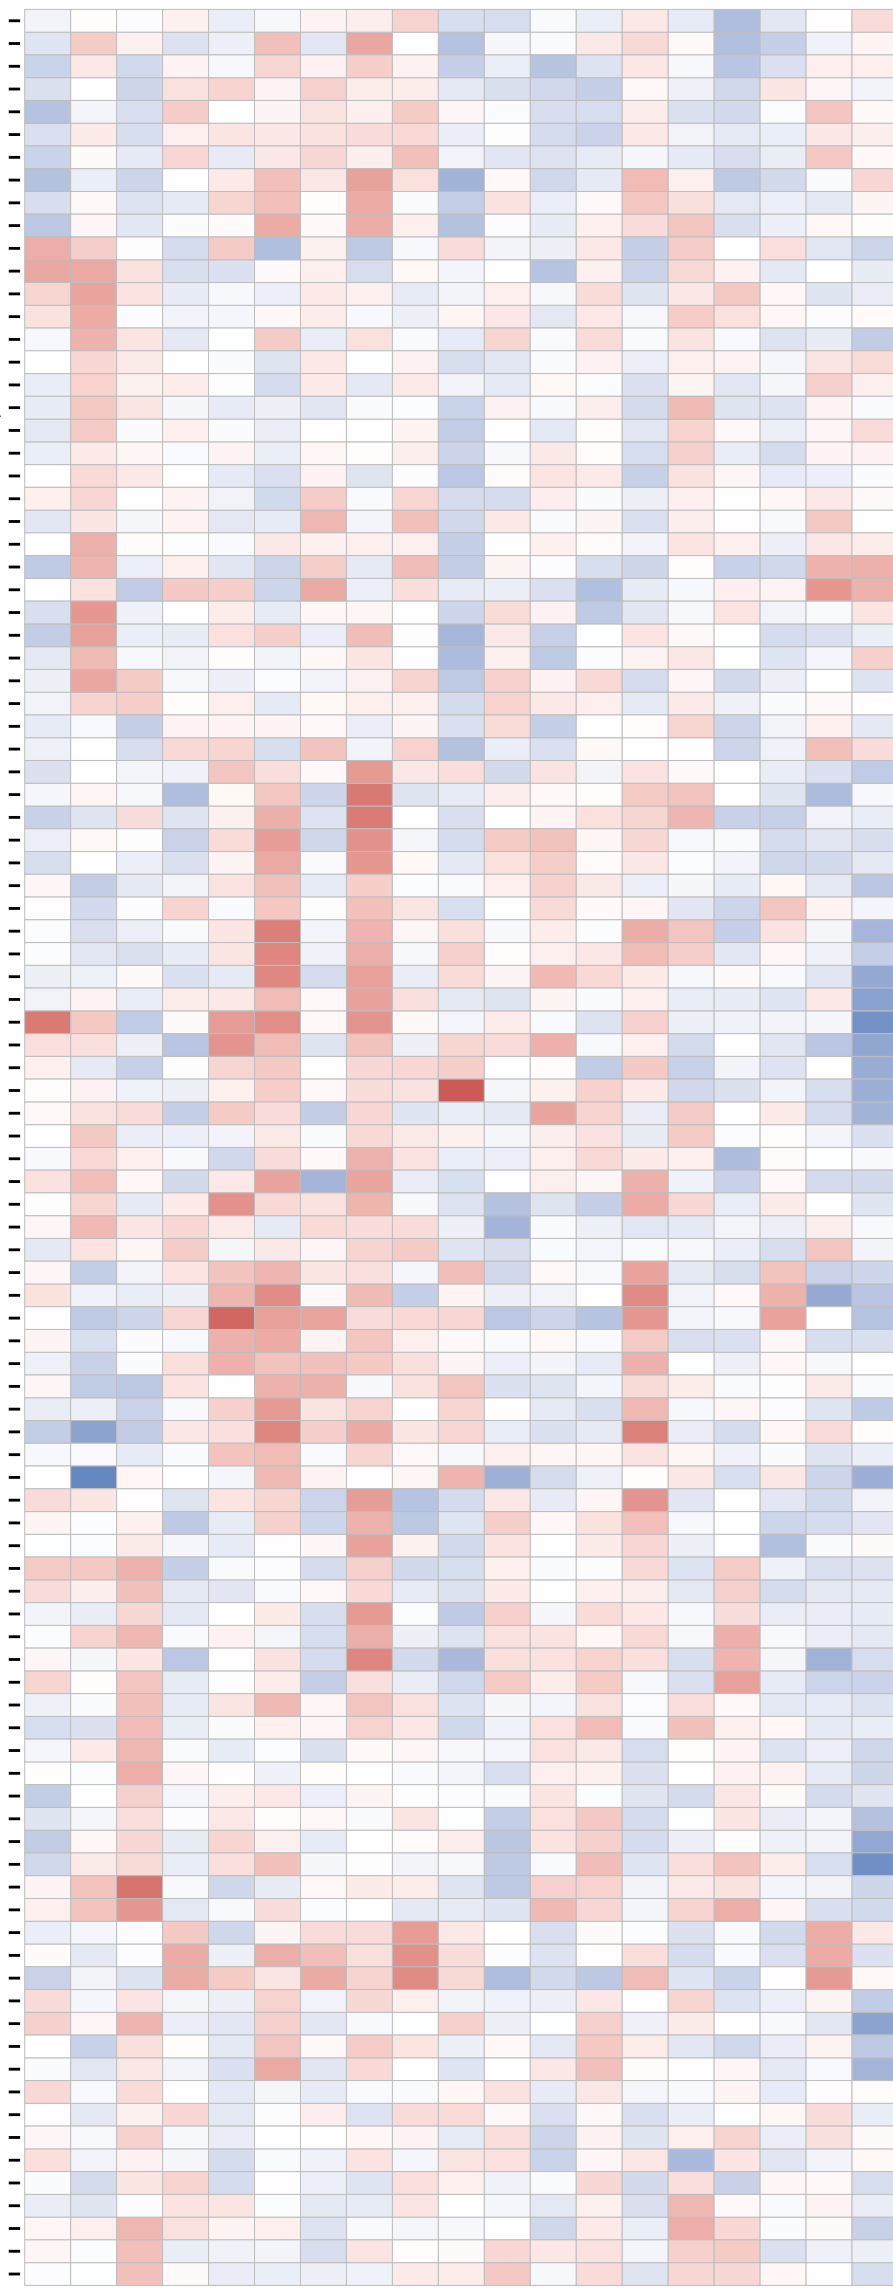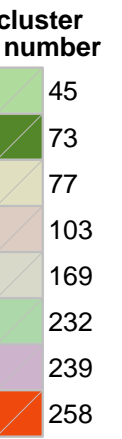

alanine -  
 aspartate -  
 glutamate -  
 phenylalanine -  
 glycine -  
 histidine -  
 isoleucine -  
 lysine -  
 leucine -  
 methionine -  
 asparagine -  
 proline -  
 glutamine -  
 arginine -  
 serine -  
 threonine -  
 valine -  
 tryptophan -  
 tyrosine -  
 cluster -

REE1 YJL217W  
 RXT3 YDL076C  
 FKH2 YNL068C  
 PRS5 YOL061W  
 MAM3 YOL060C  
 YOL079W  
 THI21 YPL258C  
 SPE2 YOL052C  
 MTD1 YKR080W  
 NTG2 YOL043C  
 PEX27 YOR193W  
 KEL3 YPL263C  
 YPL257W  
 CLN2 YPL256C  
 YOL029C  
 YAP7 YOL028C  
 PHM7 YOL084W  
 IFM1 YOL023W  
 NIT2 YJL126W  
 CCH1 YGR217W  
 YGR164W  
 PEX15 YOL044W  
 FYV8 YGR196C  
 GCG1 YER163C  
 YOL075C  
 YOL036W  
 LDS2 YOL047C  
 YOL024W  
 KCS1 YDR017C  
 PDH1 YPR002W  
 ELC1 YPL046C  
 YHR112C  
 YHR095W  
 COX5A YNL052W  
 YNL050C  
 THI12 YNL332W  
 ABZ2 YMR289W  
 HSE1 YHL002W  
 RQC2 YPL009C  
 TCA17 YEL048C  
 ALP1 YNL270C  
 SAP185 YJL098W  
 MTC7 YEL033W  
 STI1 YOR027W  
 YEL014C  
 YNG1 YOR064C  
 RSB1 YOR049C  
 YDR401W  
 NPP2 YEL016C  
 YCR043C  
 ADY2 YCR010C  
 REC107 YJR021C  
 TMC1 YOR052C  
 YLR036C  
 PRM2 YIL037C  
 ARO80 YDR421W  
 YPR109W  
 RIM9 YMR063W  
 HRK1 YOR267C  
 RPP2A YOL039W  
 IRC23 YOR044W  
 VNX1 YNL321W  
 YPR127W  
 DIA3 YDL024C  
 YBL062W  
 YKL069W  
 OPT1 YJL212C  
 YLR264C-A  
 LAC1 YKL008C  
 YKR023W  
 ATG27 YJL178C  
 TPO1 YLL028W  
 CDH1 YGL003C  
 MIG3 YER028C  
 AMD2 YDR242W  
 HOR7 YMR251W-A  
 PUS5 YLR165C  
 YGR204C-A  
 YFR035C  
 ZDS1 YMR273C  
 MMS1 YPR164W  
 YBL029W  
 EDE1 YBL047C  
 YAL045C  
 ERV25 YML012W  
 LOT5 YKL183W  
 YCL012C  
 VBA2 YBR293W  
 YNL034W  
 ERP2 YAL007C  
 SFB2 YNL049C  
 YDR182W-A  
 NGR1 YBR212W  
 YJL150W  
 YJL136W-A  
 CHA1 YCL064C  
 YJR112W-A  
 YPR039W  
 MSC6 YOR354C  
 YEH1 YLL012W

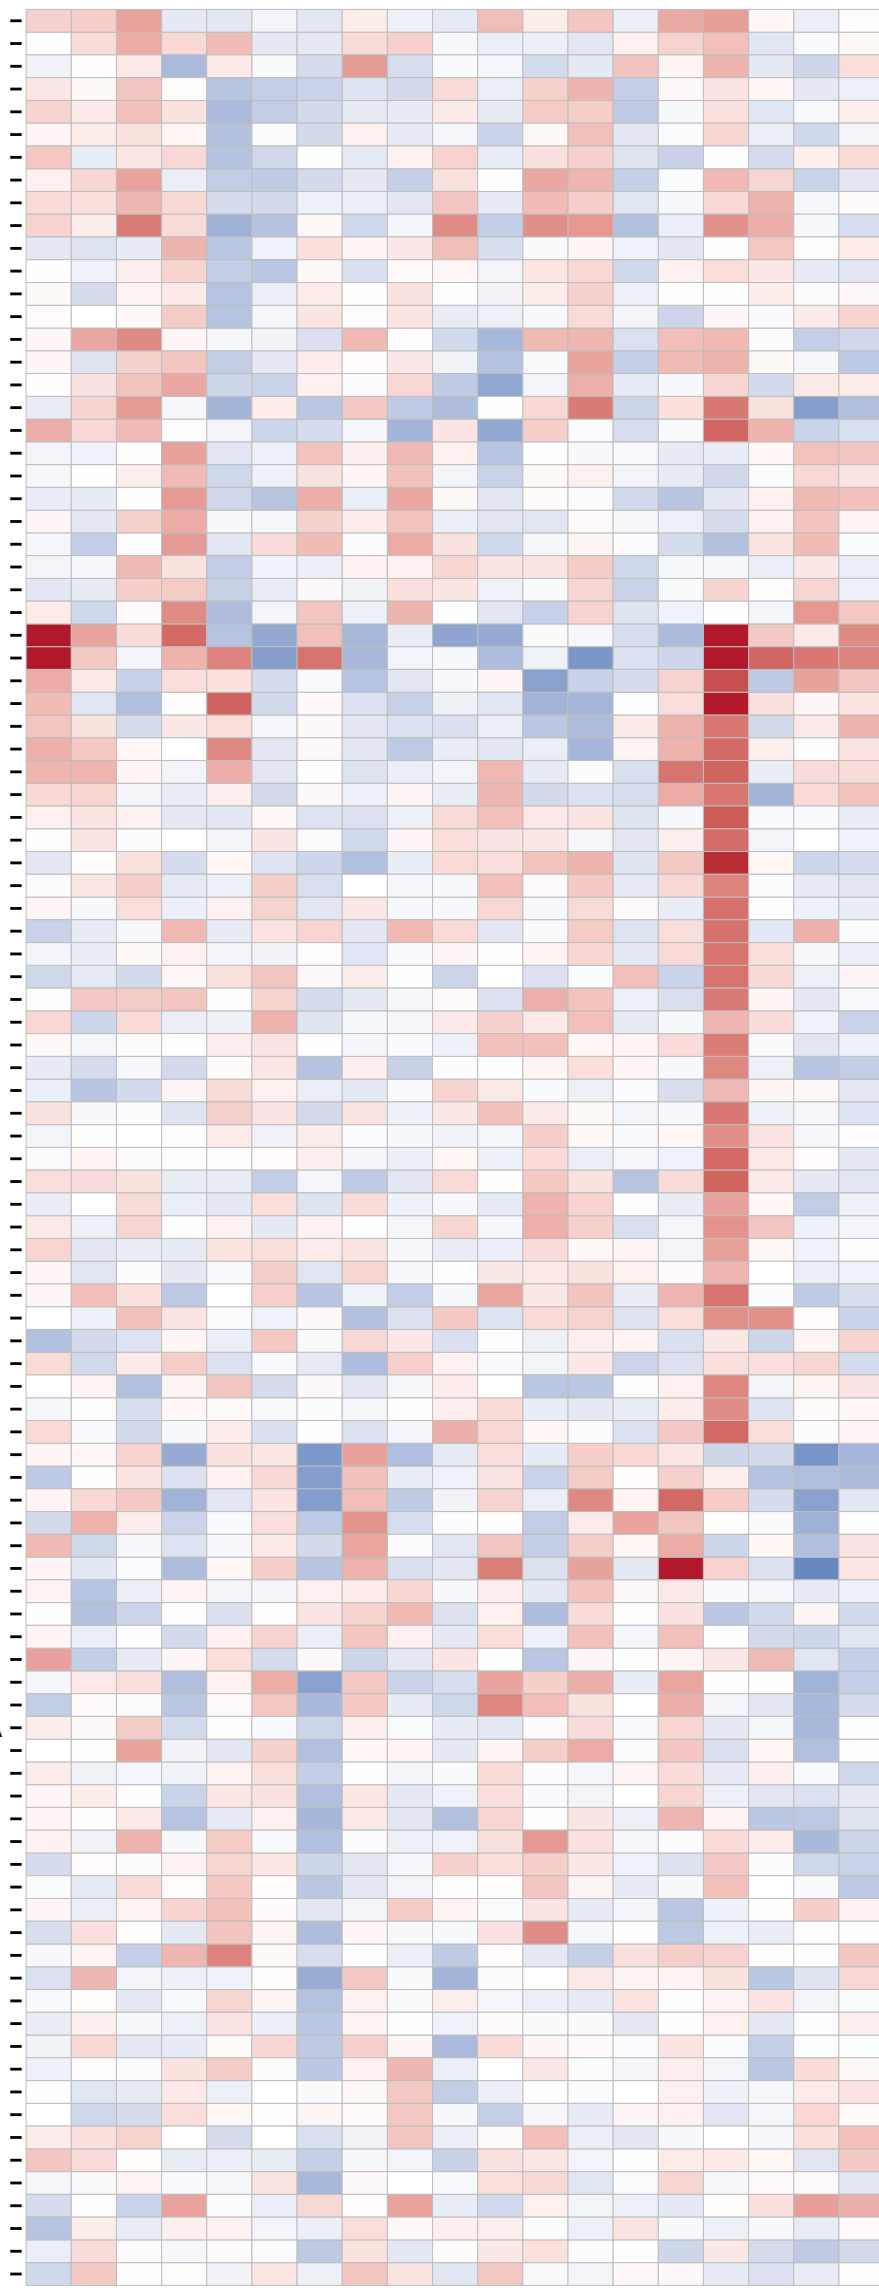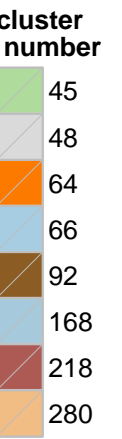

alanine -  
 aspartate -  
 glutamate -  
 phenylalanine -  
 glycine -  
 histidine -  
 isoleucine -  
 lysine -  
 leucine -  
 methionine -  
 asparagine -  
 proline -  
 glutamine -  
 arginine -  
 serine -  
 threonine -  
 valine -  
 tryptophan -  
 tyrosine -  
 cluster -

DNM1 YLL001W  
 YDL026W  
 MUM3 YOR298W  
 YDR034W-B  
 KAR3 YPR141C  
 YBL071C  
 ERV46 YAL042W  
 YMR175W-A  
 LTE1 YAL024C  
 UBC8 YEL012W  
 VAM6 YDL077C  
 PDR5 YOR153W  
 AVT2 YEL064C  
 YAL066W  
 TMA7 YLR262C-A  
 SKG3 YLR187W  
 YPL277C  
 YOR314W  
 YDR015C  
 GAL3 YDR009W  
 OSW7 YFR039C  
 SLP1 YOR154W  
 GIT1 YCR098C  
 ATP1 YBL099W  
 SET6 YPL165C  
 STP1 YDR463W  
 YAL037W  
 MHT1 YLL062C  
 YPL152W-A  
 YMR206W  
 MRPL44 YMR225C  
 PAU7 YAR020C  
 DUS3 YLR401C  
 RED1 YLR263W  
 SKI2 YLR398C  
 ASH1 YKL185W  
 YLR434C  
 YGR017W  
 SLK19 YOR195W  
 YFR032C-B  
 STE11 YLR362W  
 TGL5 YOR081C  
 FRD1 YEL047C  
 MIG1 YGL035C  
 SEC28 YIL076W  
 MFA1 YDR461W  
 YTA6 YPL074W  
 NMA2 YGR010W  
 YLL032C  
 YDL241W  
 YHR182W  
 YBR072C-A  
 GAD1 YMR250W  
 EHD3 YDR036C  
 PMT3 YOR321W  
 YLR046C  
 MTC6 YHR151C  
 YFR016C  
 YDR249C  
 YJR151W-A  
 FAA2 YER015W  
 DAN4 YJR151C  
 PMT4 YJR143C  
 GEF1 YJR040W  
 CCC2 YDR270W  
 PIP2 YOR363C  
 YKL018C-A  
 BIL1 YOR304C-A  
 YGL177W  
 TUB3 YML124C  
 GPG1 YGL121C  
 HSP31 YDR533C  
 YGL117W  
 ECM32 YER176W  
 YLL056C  
 VFA1 YER128W  
 JLP1 YLL057C  
 ENT1 YDL161W  
 SDH2 YLL041C  
 YCT1 YLL055W  
 MHO1 YJR008W  
 YML057C-A  
 RIM8 YGL045W  
 YDR154C  
 EBS1 YDR206W  
 CPR1 YDR155C  
 PHB2 YGR231C  
 YMC2 YBR104W  
 PHB1 YGR132C  
 GEA2 YEL022W  
 RIM101 YHL027W  
 RIM20 YOR275C  
 SNZ2 YNL333W  
 COS12 YGL263W  
 BIO3 YNR058W  
 PDR11 YIL013C  
 CAM1 YPL048W  
 ECT1 YGR007W  
 RGC1 YPR115W  
 SUN4 YNL066W

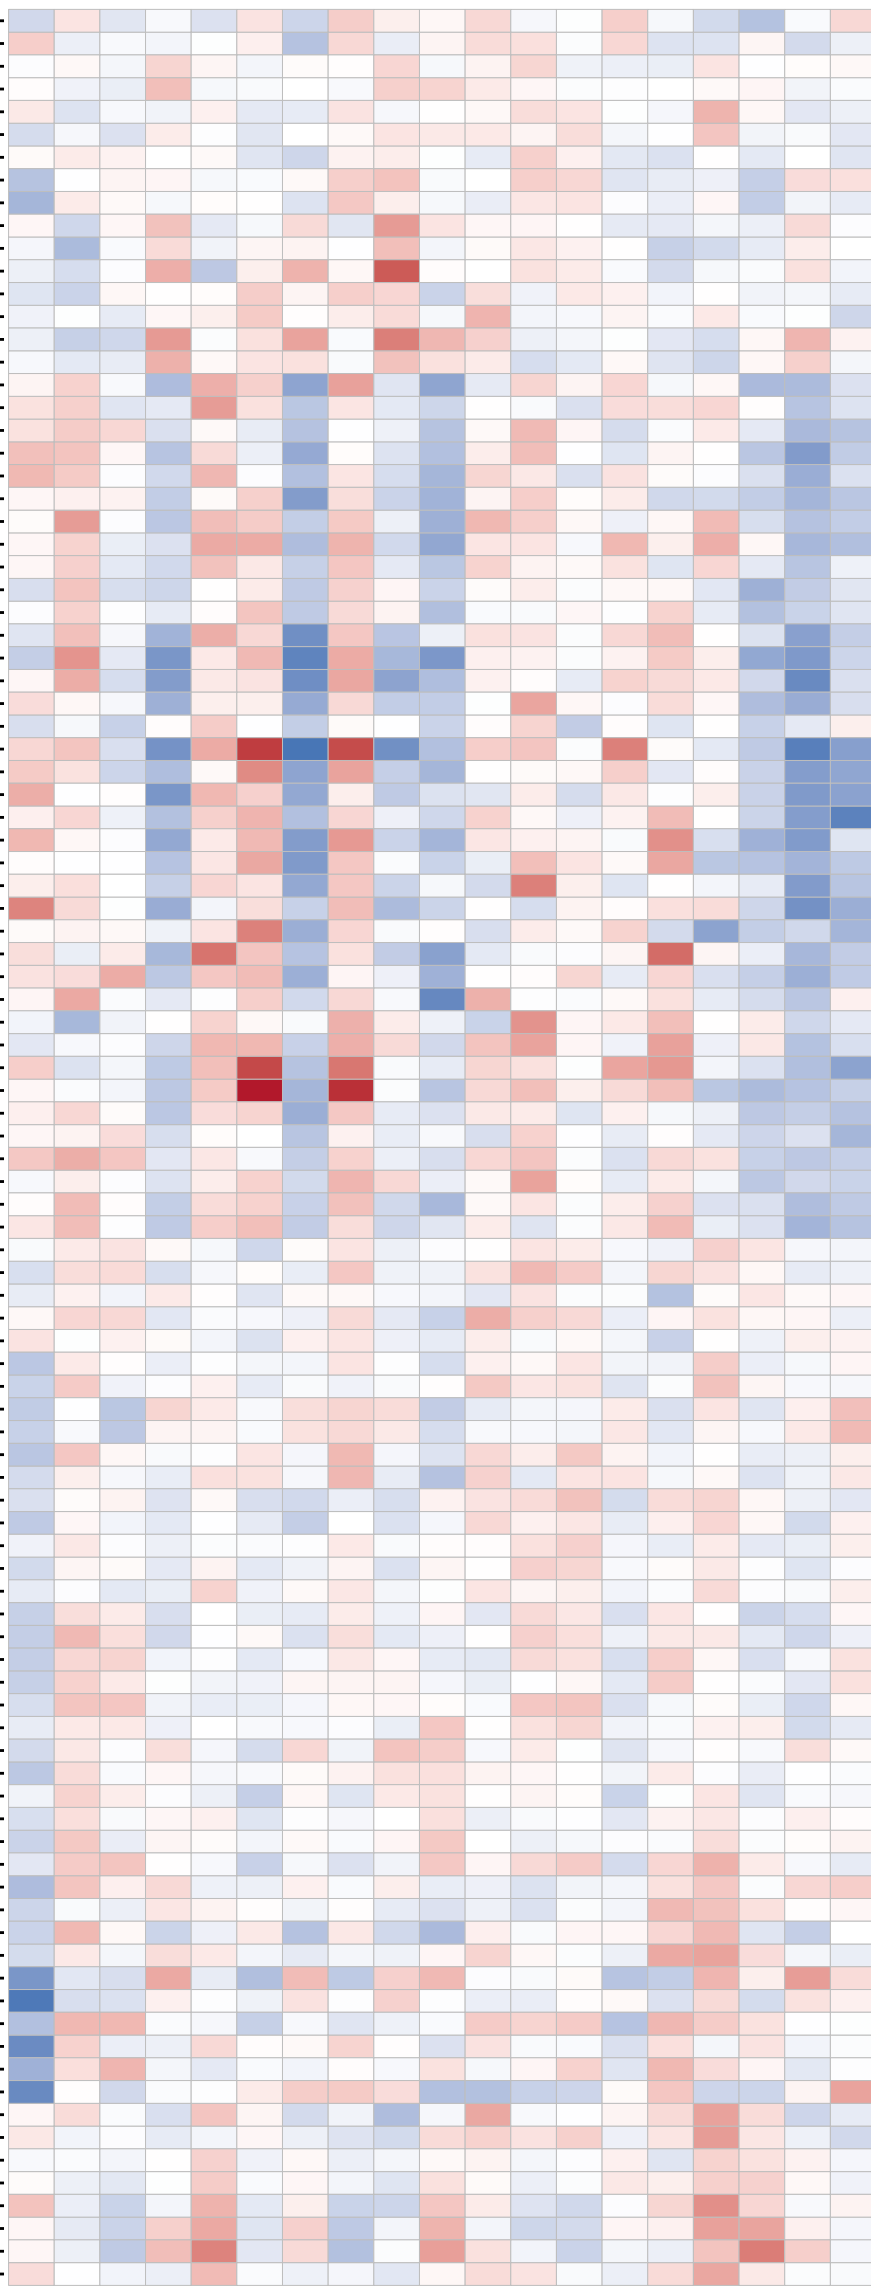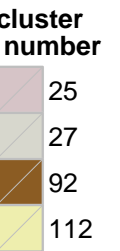

alanine -  
 aspartate -  
 glutamate -  
 phenylalanine -  
 glycine -  
 histidine -  
 isoleucine -  
 lysine -  
 leucine -  
 methionine -  
 asparagine -  
 proline -  
 glutamine -  
 arginine -  
 serine -  
 threonine -  
 valine -  
 tryptophan -  
 tyrosine -  
 cluster -

KHA1 YJL094C  
 UBC12 YLR306W  
 DCN1 YLR128W  
 YDR061W  
 VPS69 YPR087W  
 IKS1 YJL057C  
 ERP6 YGL002W  
 HSP42 YDR171W  
 APL4 YPR029C  
 SOL1 YNR034W  
 QDR1 YIL120W  
 BSC5 YNR069C  
 SPG3 YDR504C  
 PSP1 YDR505C  
 MLP2 YIL149C  
 TPM2 YIL138C  
 NIT1 YIL164C  
 TIF4632 YGL049C  
 YGL034C  
 YKR011C  
 IOC3 YFR013W  
 IRC5 YFR038W  
 DIT1 YDR403W  
 YCK2 YNL154C  
 LAM5 YFL042C  
 ECM7 YLR443W  
 DIF1 YLR437C  
 ERV41 YML067C  
 GET4 YOR164C  
 YNL095C  
 DUG2 YBR281C  
 RAD57 YDR004W  
 YOR161C-C  
 YNL097C-B  
 DSE1 YER124C  
 YIP3 YNL044W  
 HNT1 YDL125C  
 MSA1 YOR066W  
 RUB1 YDR139C  
 GAT3 YLR013W  
 OST5 YGL226C-A  
 SUT1 YGL162W  
 DAL82 YNL314W  
 AIM6 YDL237W  
 KNS1 YLL019C  
 URH1 YDR400W  
 YER135C  
 DCI1 YOR180C  
 COT1 YOR316C  
 YDR090C  
 CWC21 YDR482C  
 PKH3 YDR466W  
 YLR042C  
 TRK2 YKR050W  
 PSY1 YKL076C  
 TEL1 YBL088C  
 MRS4 YKR052C  
 PTC3 YBL056W  
 HEK2 YBL032W  
 YNL040W  
 OSW1 YOR255W  
 PNC1 YGL037C  
 HXT8 YJL214W  
 DJP1 YIR004W  
 TDA5 YLR426W  
 RBL2 YOR265W  
 IRE1 YHR079C  
 LPL1 YOR059C  
 YPR064W  
 RMD8 YFR048W  
 ATG17 YLR423C  
 UFD2 YDL190C  
 YFL032W  
 THI20 YOL055C  
 TOF1 YNL273W  
 SNU66 YOR308C  
 MTQ2 YDR140W  
 RMI1 YPL024W  
 SHB17 YKR043C  
 FMT1 YBL013W  
 YEL1 YBL060W  
 SCT1 YBL011W  
 MAF1 YDR005C  
 MCM16 YPR046W  
 YKL075C  
 EPS1 YIL005W  
 SET5 YHR207C  
 ADD66 YKL206C  
 KGD2 YDR148C  
 BMH2 YDR099W  
 YOR300W  
 SHS1 YDL225W  
 RRI1 YDL216C  
 OST4 YDL232W  
 SKN7 YHR206W  
 LEO1 YOR123C  
 MAK10 YEL053C  
 YEL020C  
 YNR014W  
 ICT1 YLR099C

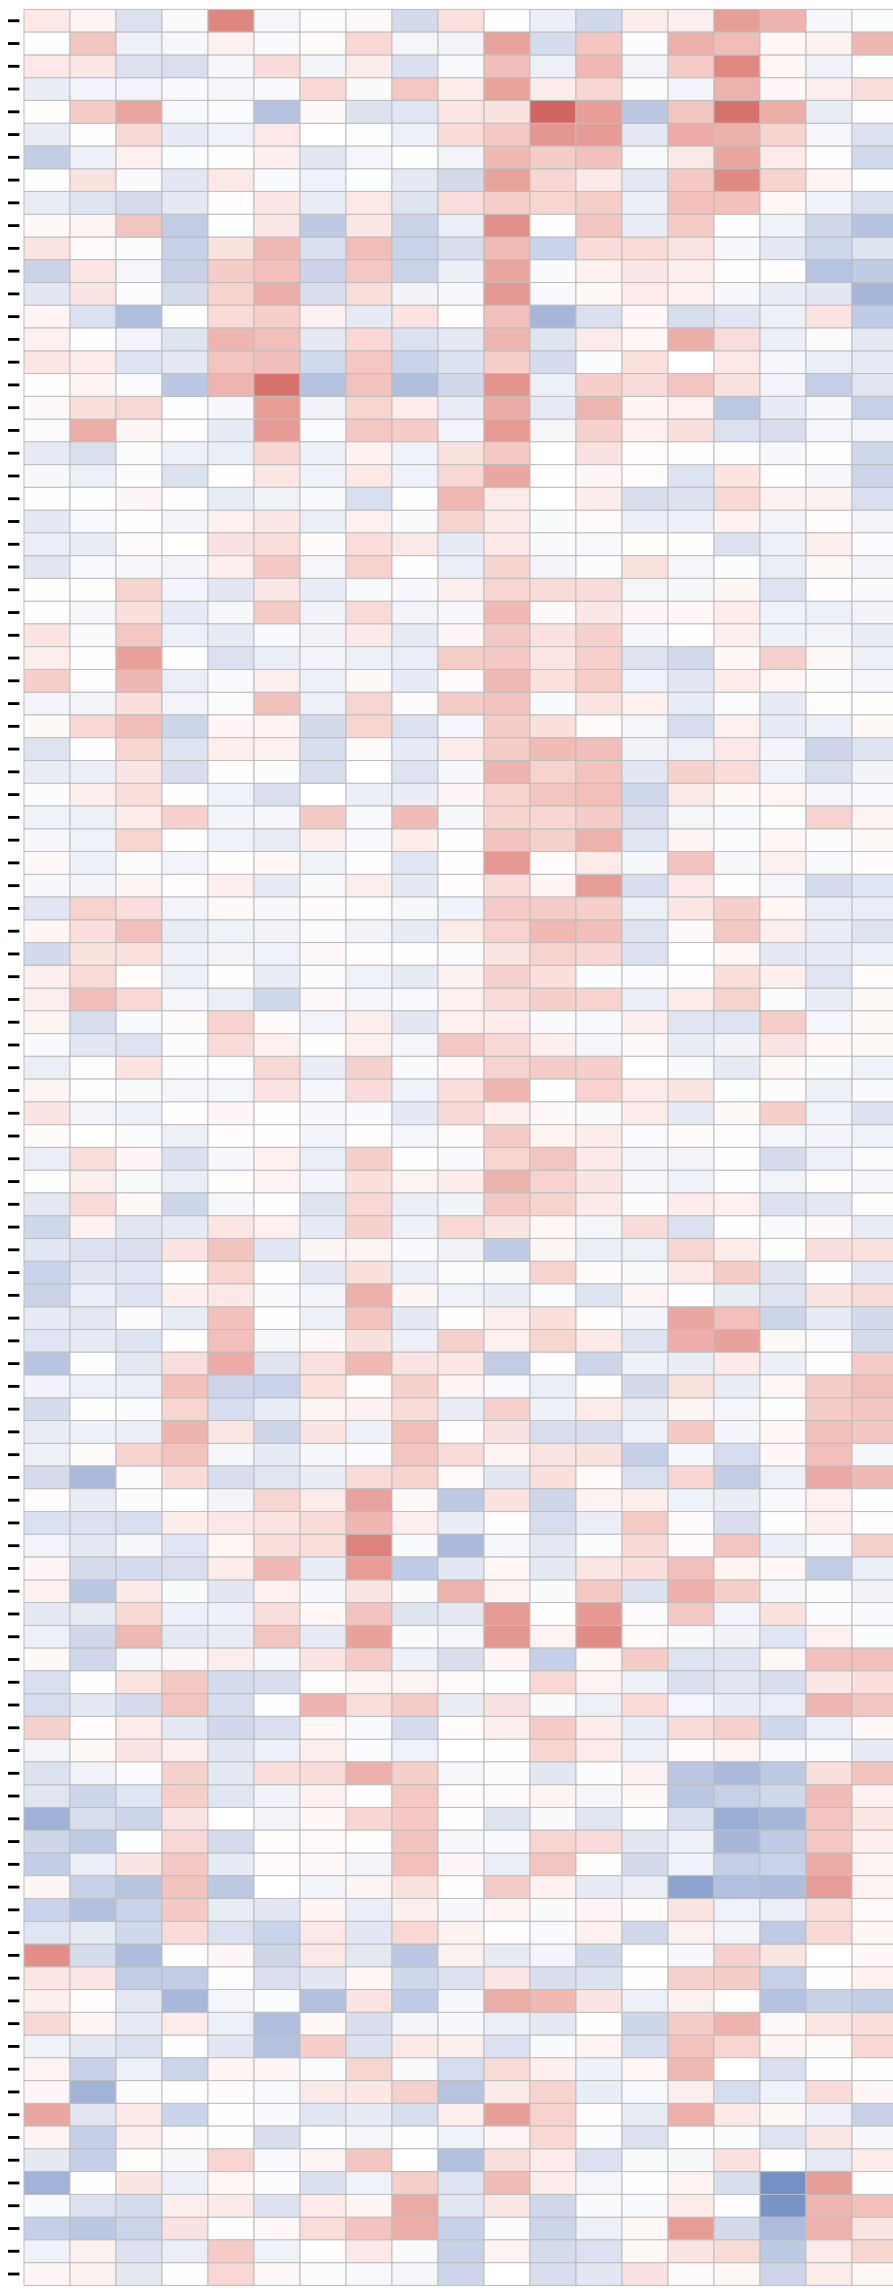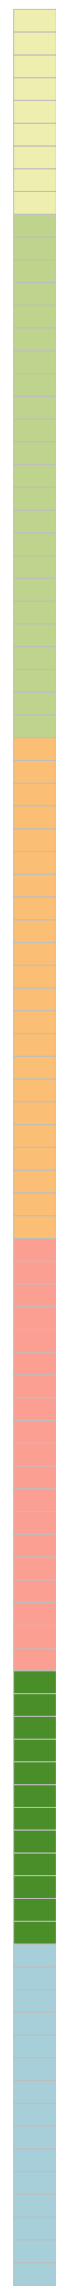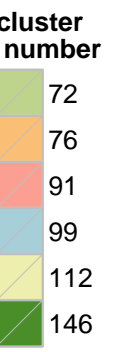

alanine -  
 aspartate -  
 glutamate -  
 phenylalanine -  
 glycine -  
 histidine -  
 isoleucine -  
 lysine -  
 leucine -  
 methionine -  
 asparagine -  
 proline -  
 glutamine -  
 arginine -  
 serine -  
 threonine -  
 valine -  
 tryptophan -  
 tyrosine -  
 cluster -



YOR379C  
 RRM3 YHR031C  
 ROG1 YGL144C  
 ASI1 YMR119W  
 THP2 YHR167W  
 HHT2 YNL031C  
 YBR287W  
 MFB1 YDR219C  
 GLK1 YCL040W  
 NAS2 YIL007C  
 UBP6 YFR010W  
 GIR2 YDR152W  
 YPK1 YKL126W  
 TUM1 YOR251C  
 YOR366W  
 HRB1 YNL004W  
 YPK3 YBR028C  
 YGL036W  
 ASI3 YNL008C  
 FAP1 YNL023C  
 YLR297W  
 SWE1 YJL187C  
 DUS1 YML080W  
 TRM8 YDL201W  
 RRT14 YIL127C  
 YFL051C  
 YOP1 YPR028W  
 BIO5 YNR056C  
 MTC4 YBR255W  
 FKS1 YLR342W  
 ATG39 YLR312C  
 HUA1 YGR268C  
 RPL2A YFR031C-A  
 ATP14 YLR295C  
 CIK1 YMR198W  
 ASP1 YDR321W  
 YDR161W  
 MDS3 YGL197W  
 YDR222W  
 ERG5 YMR015C  
 YHR210C  
 OAF1 YAL051W  
 REC102 YLR329W  
 ALR2 YFL050C  
 MSO1 YNR049C  
 YNR025C  
 YLR311C  
 YPR153W  
 PET494 YNR045W  
 EIS1 YMR031C  
 MIX17 YMR002W  
 YMR279C  
 YDR029W  
 UBX3 YDL091C  
 ASM4 YDL088C  
 YKL033W-A  
 YIL054W  
 MAD1 YGL086W  
 PAU5 YFL020C  
 UBX2 YML013W  
 GLO1 YML004C  
 HXT2 YMR011W  
 CSI1 YMR025W  
 SPO20 YMR017W  
 YLR112W  
 XDJ1 YLR090W  
 PLB2 YMR006C  
 MRH1 YDR033W  
 YML034C-A  
 IVY1 YDR229W  
 YER186C  
 YML089C  
 YML002W  
 RRT2 YBR246W  
 MCX1 YBR227C  
 YHL017W  
 YML116W-A  
 YJL182C  
 RVS167 YDR388W  
 YJR079W  
 YMR178W  
 UPC2 YDR213W  
 INP2 YMR163C  
 RIM4 YHL024W  
 AVT4 YNL101W  
 DYN1 YKR054C  
 TPK1 YJL164C  
 RPL40B YKR094C  
 YGL118C  
 YIL102C  
 FIT1 YDR534C  
 FAR3 YMR052W  
 RTC3 YHR087W  
 PTC2 YER089C  
 SLF1 YDR515W  
 AAD3 YCR107W  
 GTR2 YGR163W  
 RIM15 YFL033C  
 YDR509W  
 HNT2 YDR305C

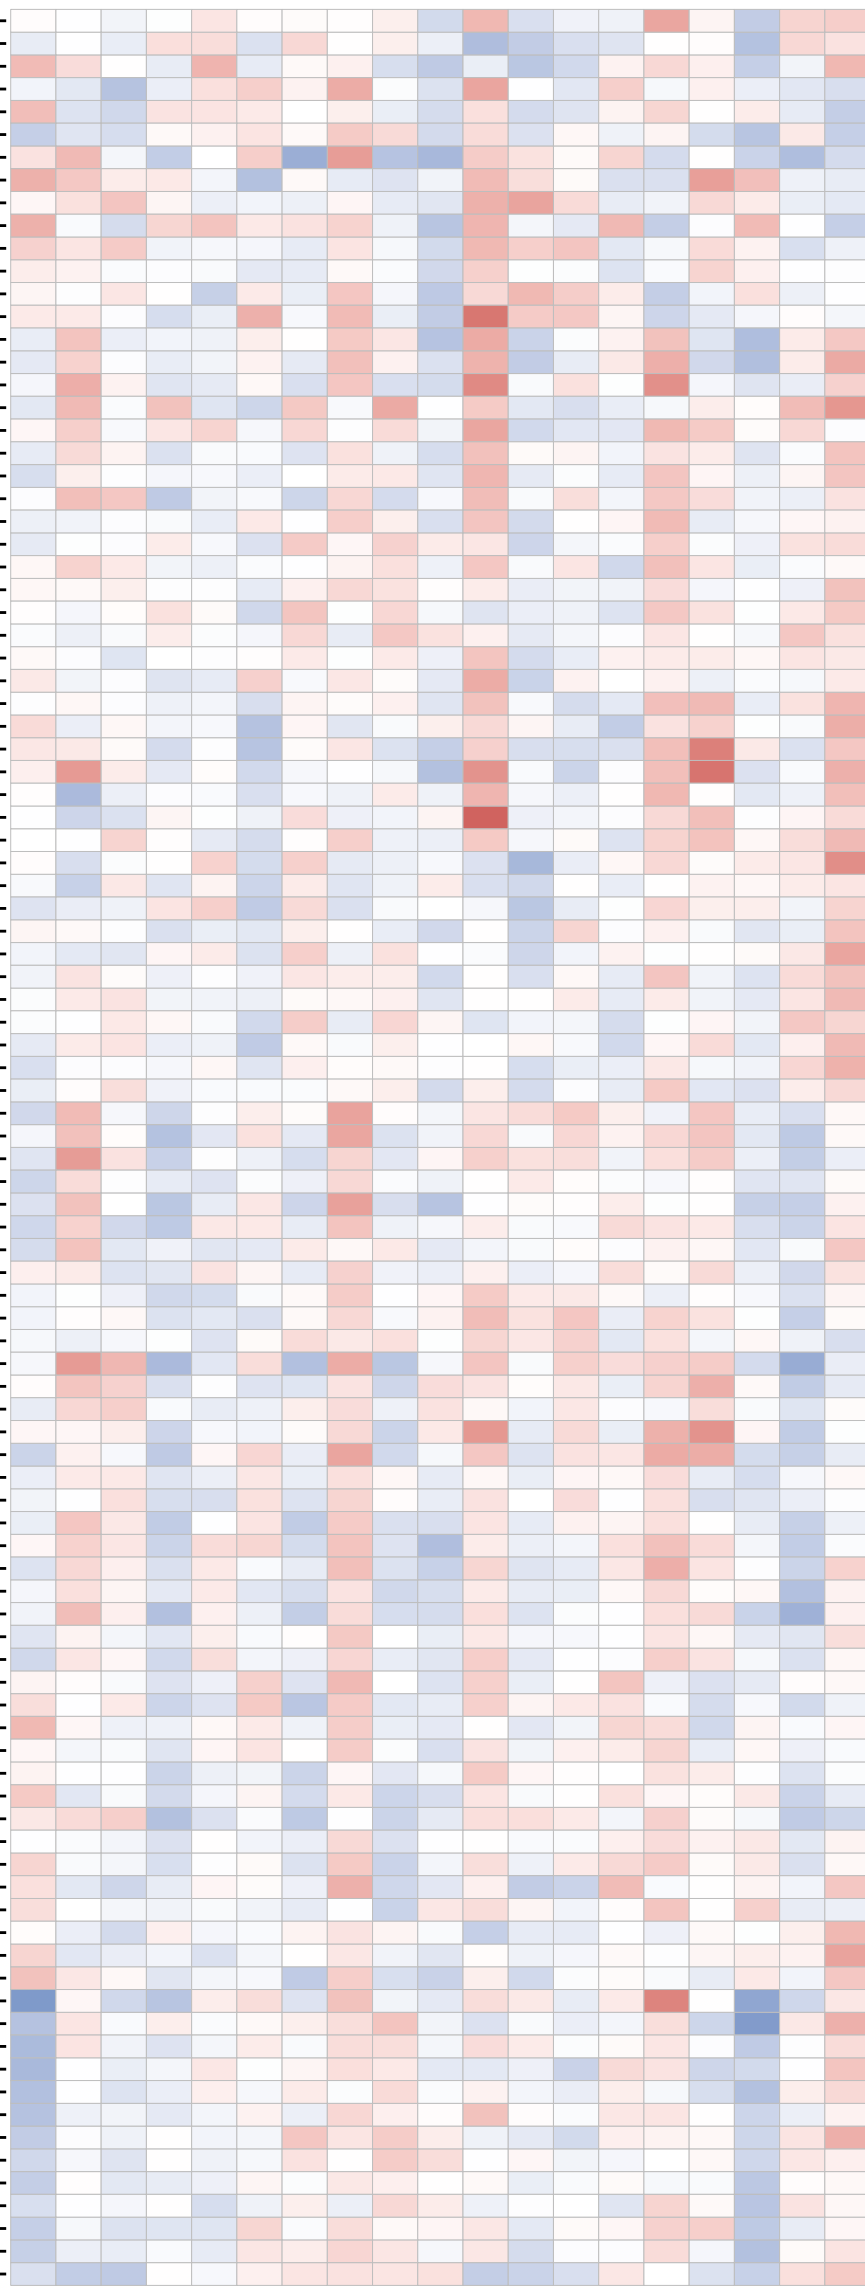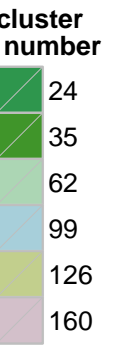

alanine -  
 aspartate -  
 glutamate -  
 phenylalanine -  
 glycine -  
 histidine -  
 isoleucine -  
 lysine -  
 leucine -  
 methionine -  
 asparagine -  
 proline -  
 glutamine -  
 arginine -  
 serine -  
 threonine -  
 valine -  
 tryptophan -  
 tyrosine -  
 cluster -

CRP1 YHR146W  
 HRQ1 YDR291W  
 HAA1 YPR008W  
 BSC2 YDR275W  
 FPR2 YDR519W  
 EMI2 YDR516C  
 SRT1 YMR101C  
 RMT2 YDR465C  
 HEL1 YKR017C  
 YLR285C-A  
 CDC55 YGL190C  
 TED1 YIL039W  
 STB2 YMR053C  
 YIL067C  
 MAL12 YGR292W  
 YBR285W  
 TDA8 YAL064C-A  
 YPR159C-A  
 SPH1 YLR313C  
 RFU1 YLR073C  
 SAF1 YBR280C  
 AQY1 YPR192W  
 MSH3 YCR092C  
 POM152 YMR129W  
 SWP82 YFL049W  
 GCN20 YFR009W  
 BUB2 YMR055C  
 YGR122C-A  
 YOR364W  
 YMR057C  
 YDR444W  
 GRH1 YDR517W  
 SRL2 YLR082C  
 YGR291C  
 MDL1 YLR188W  
 WWM1 YFL010C  
 YLR342W-A  
 SCY1 YGL083W  
 RNH70 YGR276C  
 AUA1 YFL010W-A  
 ZPS1 YOL154W  
 YJR085C  
 YPR076W  
 YDR094W  
 SDH6 YDR379C-A  
 PHO8 YDR481C  
 ART10 YLR392C  
 MCR1 YKL150W  
 NEJ1 YLR265C  
 YLR279W  
 PIR1 YKL164C  
 AFB1 YLR040C  
 IDS2 YJL146W  
 BIM1 YER016W  
 MRP7 YNL005C  
 MCM21 YDR318W  
 KTR3 YBR205W  
 YFT2 YDR319C  
 DER1 YBR201W  
 CRN1 YLR429W  
 ABZ1 YNR033W  
 YMR317W  
 HUG1 YML058W-A  
 YDR271C  
 ATH1 YPR026W  
 MRX12 YJR003C  
 MSR1 YHR091C  
 YPL260W  
 UGA3 YDL170W  
 YDL144C  
 IRC3 YDR332W  
 UGX2 YDL169C  
 OM14 YBR230C  
 RHO2 YNL090W  
 YSC83 YHR017W  
 TAE1 YBR261C  
 YJR096W  
 BUD3 YCL014W  
 APE2 YKL157W  
 YOR268C  
 YNL042W-B  
 ANB1 YJR047C  
 YJL047C-A  
 CTT1 YGR088W  
 YBR137W  
 APS2 YJR058C  
 YHP1 YDR451C  
 IRC20 YLR247C  
 YPR012W  
 GMC2 YLR445W  
 HPC2 YBR215W  
 DSF2 YBR007C  
 VMA22 YHR060W  
 PPN1 YDR452W  
 YNL010W  
 PYC2 YBR218C  
 STB4 YMR019W  
 YER175W-A  
 MRP13 YGR084C  
 YGR051C

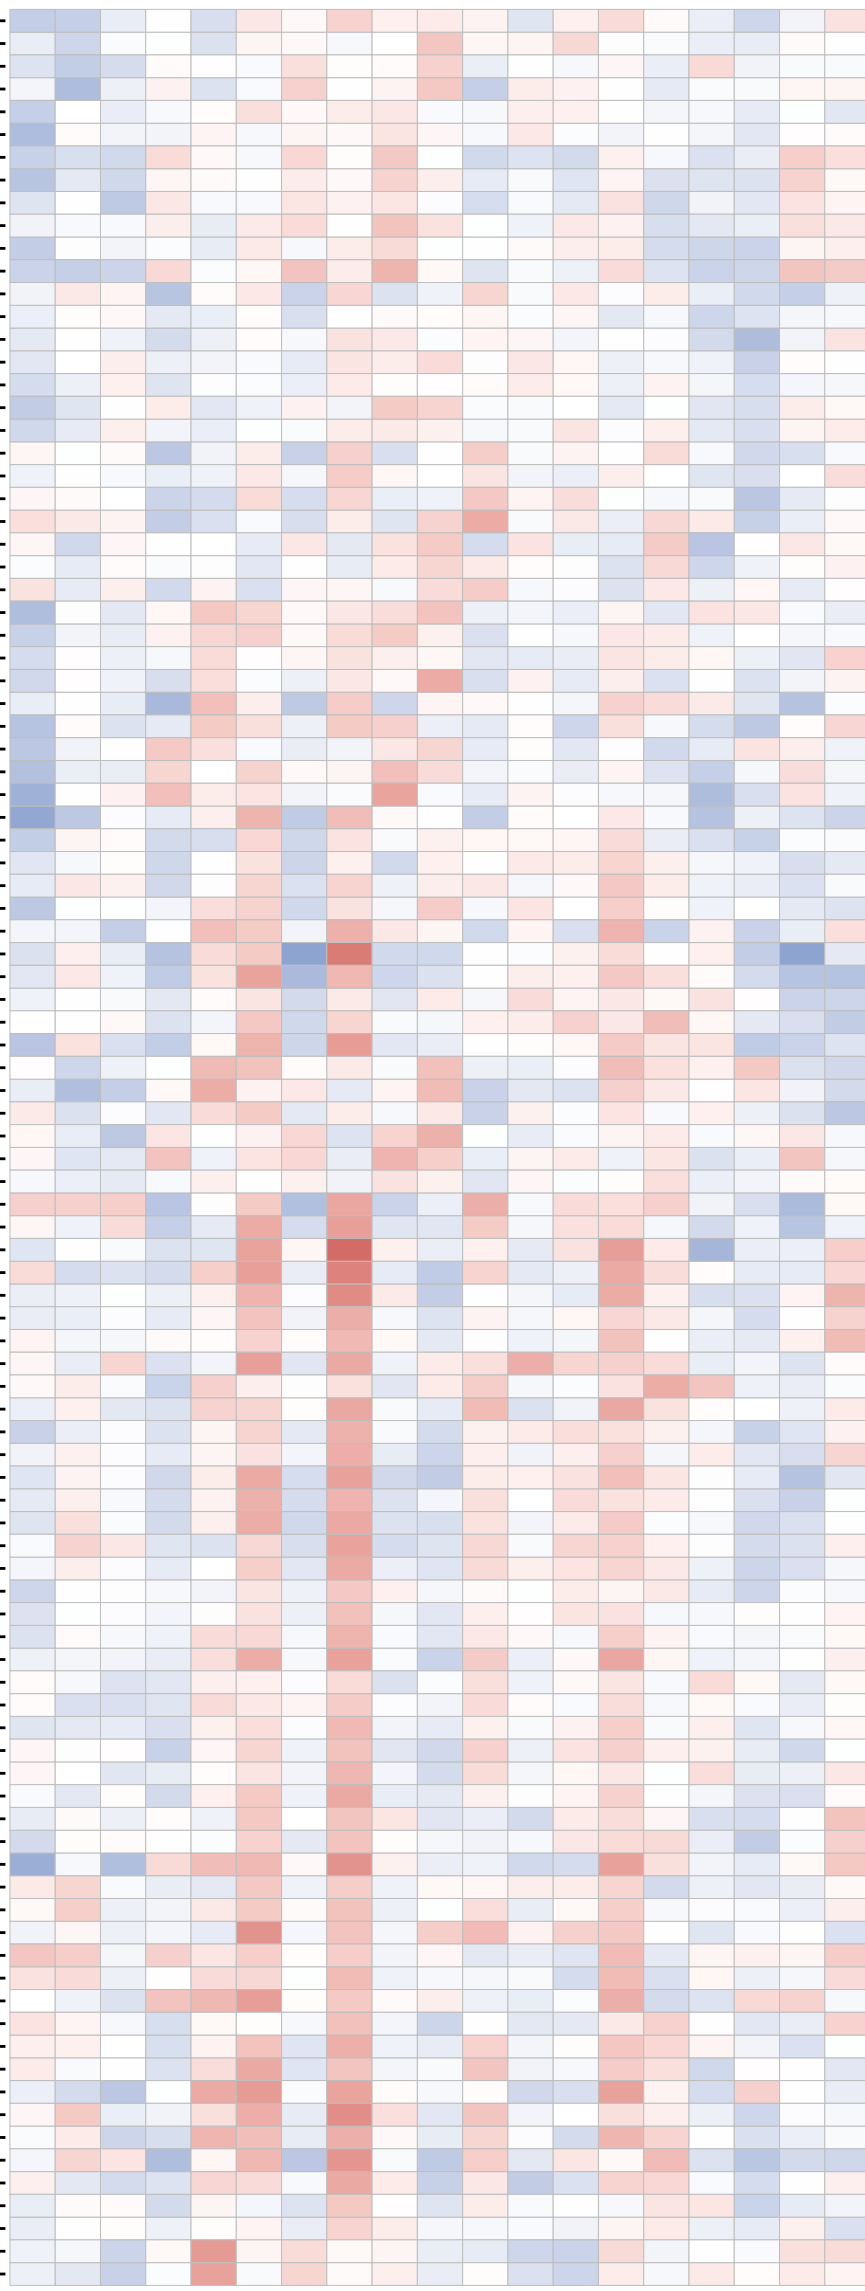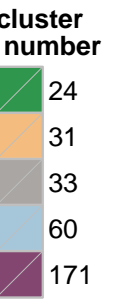

alanine -  
 aspartate -  
 glutamate -  
 phenylalanine -  
 glycine -  
 histidine -  
 isoleucine -  
 lysine -  
 leucine -  
 methionine -  
 asparagine -  
 proline -  
 glutamine -  
 arginine -  
 serine -  
 threonine -  
 valine -  
 tryptophan -  
 tyrosine -  
 cluster -

TDH2 YJR009C  
 HXT5 YHR096C  
 ATO2 YNR002C  
 KTR5 YNL029C  
 BDS1 YOL164W  
 YPC1 YBR183W  
 SMP1 YBR182C  
 YDL023C  
 GPD1 YDL022W  
 YJR120W  
 YPL073C  
 KRE2 YDR483W  
 YFL012W  
 YDR467C  
 NGL3 YML118W  
 AXL2 YIL140W  
 BIT61 YJL058C  
 RPL23B YER117W  
 YMR105W-A  
 ERG28 YER044C  
 UIP3 YAR027W  
 GDH3 YAL062W  
 LPP1 YDR503C  
 NTG1 YAL015C  
 PLM2 YDR501W  
 DAT1 YML113W  
 TRS33 YOR115C  
 GAL83 YER027C  
 CUZ1 YNL155W  
 OSH6 YKR003W  
 GIP4 YAL031C  
 FBP1 YLR377C  
 YLR416C  
 NTE1 YML059C  
 BLM10 YFL007W  
 USA1 YML029W  
 SOL2 YCR073W-A  
 BUD6 YLR319C  
 EXG1 YLR300W  
 ATG32 YIL146C  
 YFH7 YFR007W  
 YDR210W  
 CSM4 YPL200W  
 YJL135W  
 ATR1 YML116W  
 YBL055C  
 BNA3 YJL060W  
 HSP104 YLL026W  
 YGR269W  
 PBA1 YLR199C  
 CSN9 YDR179C  
 ECM21 YBL101C  
 FOX2 YKR009C  
 PSK1 YAL017W  
 FDC1 YDR539W  
 RQC1 YDR333C  
 ATG4 YNL223W  
 YGL235W  
 NPY1 YGL067W  
 YLR428C  
 PCI8 YIL071C  
 YPT53 YNL093W  
 CHL1 YPL008W  
 FRE5 YOR384W  
 HFD1 YMR110C  
 ALY1 YKR021W  
 FMP32 YFL046W  
 PRS4 YBL068W  
 ADY4 YLR227C  
 YKR070W  
 AST1 YBL069W  
 KAR5 YMR065W  
 YPL068C  
 HFM1 YGL251C  
 YGR250C  
 PST2 YDR032C  
 YBR292C  
 KIP3 YGL216W  
 UBP9 YER098W  
 BDF2 YDL070W  
 KTR2 YKR061W  
 YCR023C  
 PRD1 YCL057W  
 TNA1 YGR260W  
 PHM6 YDR281C  
 MAM33 YIL070C  
 STE5 YDR103W  
 APE1 YKL103C  
 YJL118W  
 KEL2 YGR238C  
 FMO1 YHR176W  
 FLR1 YBR008C  
 PEX11 YOL147C  
 DLS1 YJL065C  
 OPY2 YPR075C  
 ARO9 YHR137W  
 SPI1 YER150W  
 ATG40 YOR152C  
 TOF2 YKR010C  
 UTP30 YKR060W

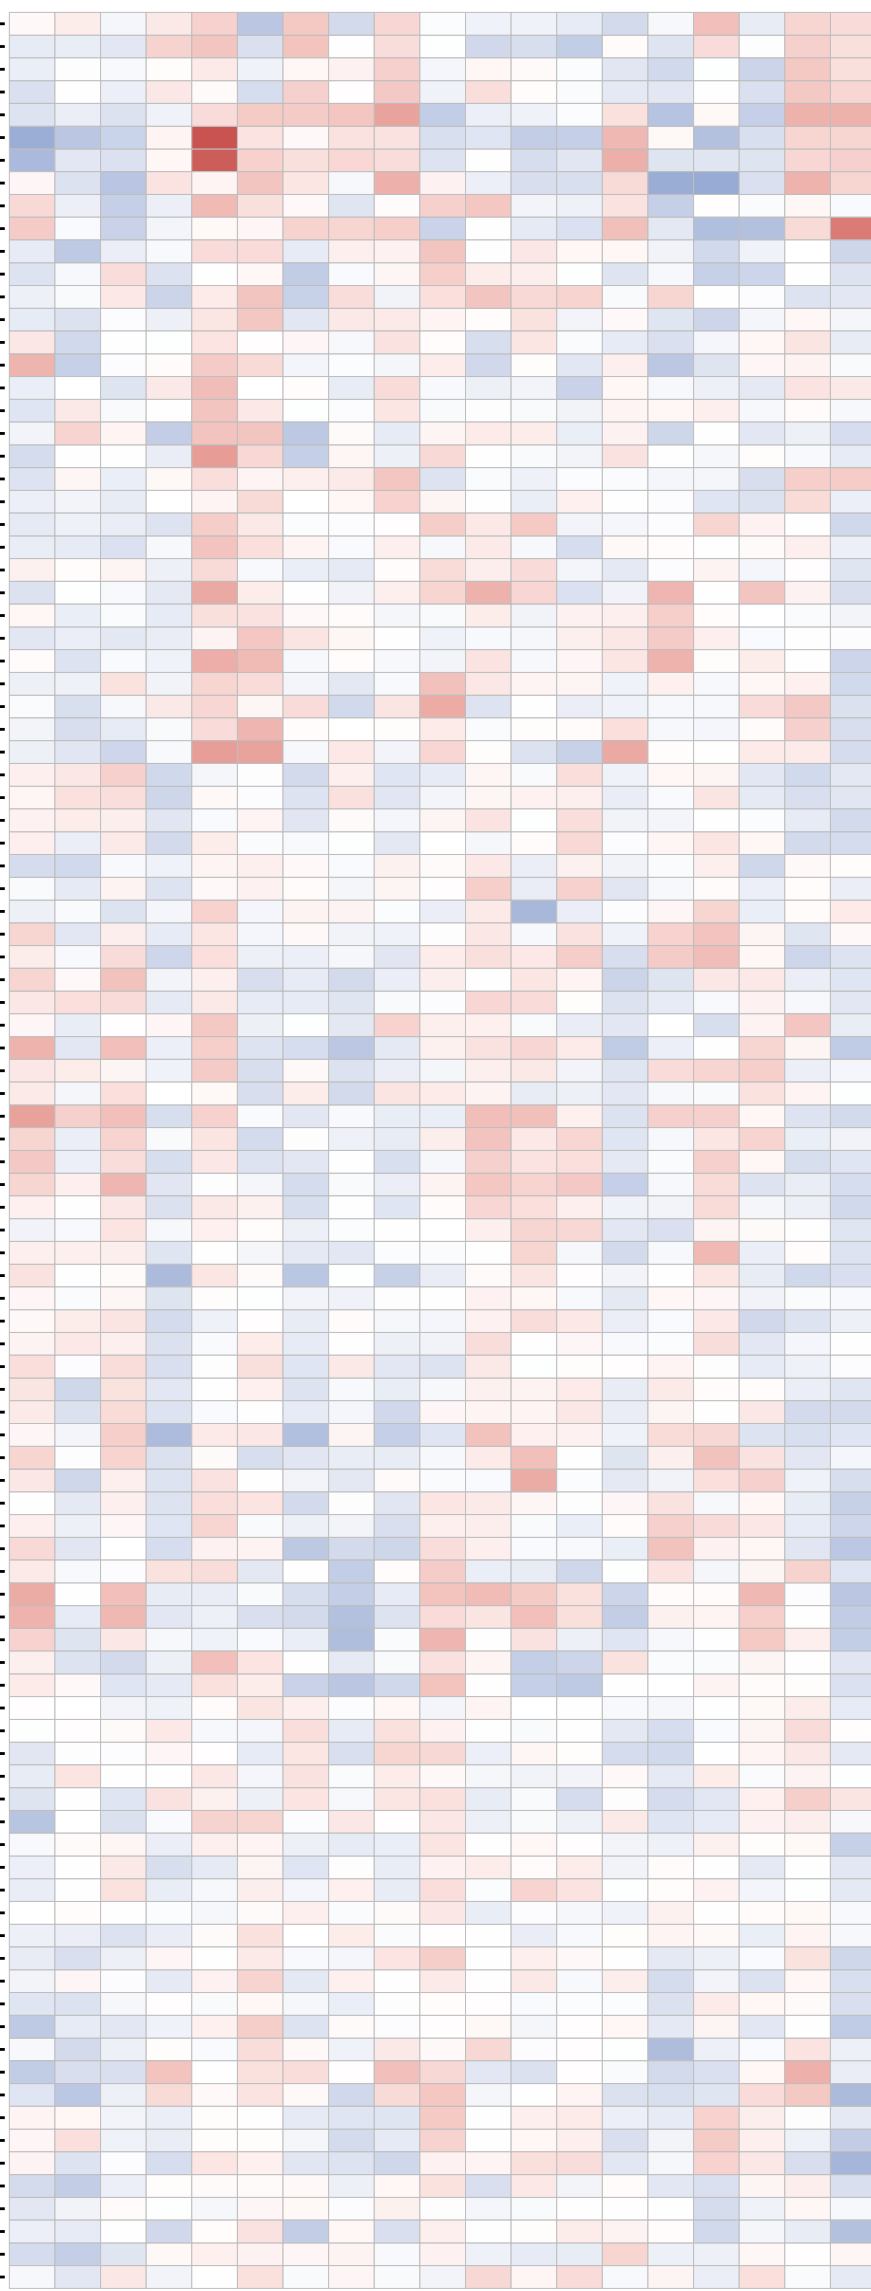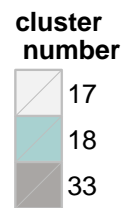

alanine -  
 aspartate -  
 glutamate -  
 phenylalanine -  
 glycine -  
 histidine -  
 isoleucine -  
 lysine -  
 leucine -  
 methionine -  
 asparagine -  
 proline -  
 glutamine -  
 arginine -  
 serine -  
 threonine -  
 valine -  
 tryptophan -  
 tyrosine -  
 cluster -

SPO14 YKR031C  
 YLR400W  
 YAR023C  
 GTS1 YGL181W  
 SPR6 YER115C  
 HSP78 YDR258C  
 YDL121C  
 MSH4 YFL003C  
 ATG11 YPR049C  
 STV1 YMR054W  
 POG1 YIL122W  
 GUT2 YIL155C  
 FKH1 YIL131C  
 PKH1 YDR490C  
 YMR230W-A  
 ALT2 YDR111C  
 YHR097C  
 YNR042W  
 RCF2 YNR018W  
 PGM2 YMR105C  
 MAL33 YBR297W  
 YER134C  
 YCR061W  
 KCH1 YJR054W  
 DAL3 YIR032C  
 ORM1 YGR038W  
 YLR041W  
 MAM1 YER106W  
 CTA1 YDR256C  
 MNN9 YPL050C  
 UGA4 YDL210W  
 LRS4 YDR439W  
 GGA1 YDR358W  
 YLR255C  
 YDR340W  
 YLL059C  
 TGL2 YDR058C  
 AMS1 YGL156W  
 YMR194C-A  
 RSM28 YDR494W  
 YEL008W  
 GPB1 YOR371C  
 YKR040C  
 UBX6 YJL048C  
 DSE2 YHR143W  
 OYE2 YHR179W  
 YOR114W  
 COX8 YLR395C  
 CHS7 YHR142W  
 FRM2 YCL026C-A  
 NTO1 YPR031W  
 YPR050C  
 IDP3 YNL009W  
 TIF2 YJL138C  
 DGR1 YNL130C-A  
 AIM20 YIL158W  
 YOR020W-A  
 COX5B YIL111W  
 YOL159C-A  
 PAN5 YHR063C  
 SNA2 YDR525W-A  
 YPR059C  
 CHK1 YBR274W  
 NTA1 YJR062C  
 SKG6 YHR149C  
 STR3 YGL184C  
 YOL164W-A  
 LNP1 YHR192W  
 YMR315W-A  
 YJL028W  
 MCP1 YOR228C  
 RSF1 YMR030W  
 ECM8 YBR076W  
 YMR018W  
 PDR8 YLR266C  
 YHR125W  
 ADI1 YMR009W  
 CTS1 YLR286C  
 CPR3 YML078W  
 SCP160 YJL080C  
 ENV9 YOR246C  
 PSR1 YLL010C  
 HAP4 YKL109W  
 RRT1 YBL048W  
 TGL1 YKL140W  
 MSB2 YGR014W  
 FLO1 YAR050W  
 FRE4 YNR060W  
 YPR078C  
 OTU1 YFL044C  
 YPL245W  
 MYO3 YKL129C  
 RDH54 YBR073W  
 FMS1 YMR020W  
 FHN1 YGR131W  
 YER067C-A  
 YLR349W  
 YML003W  
 HUB1 YNR032C-A  
 YOR376W-A

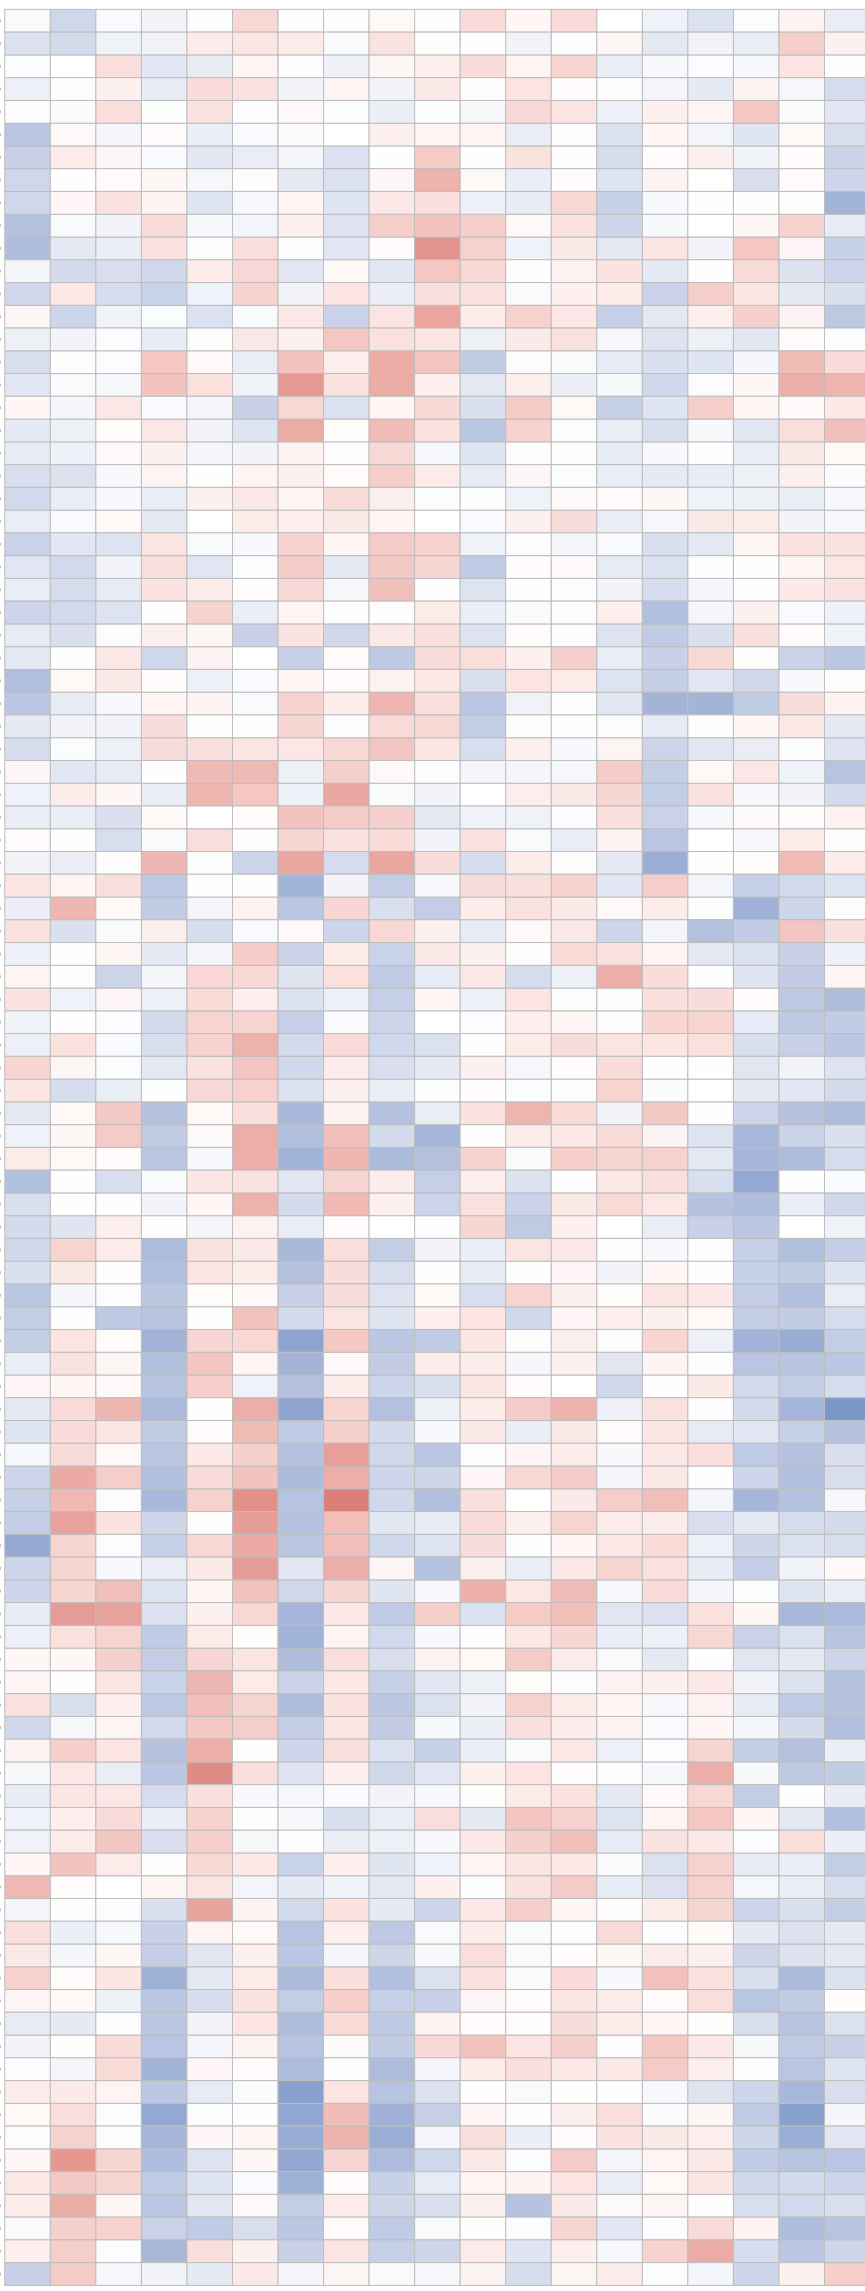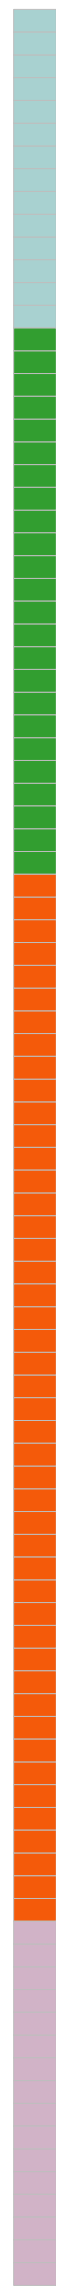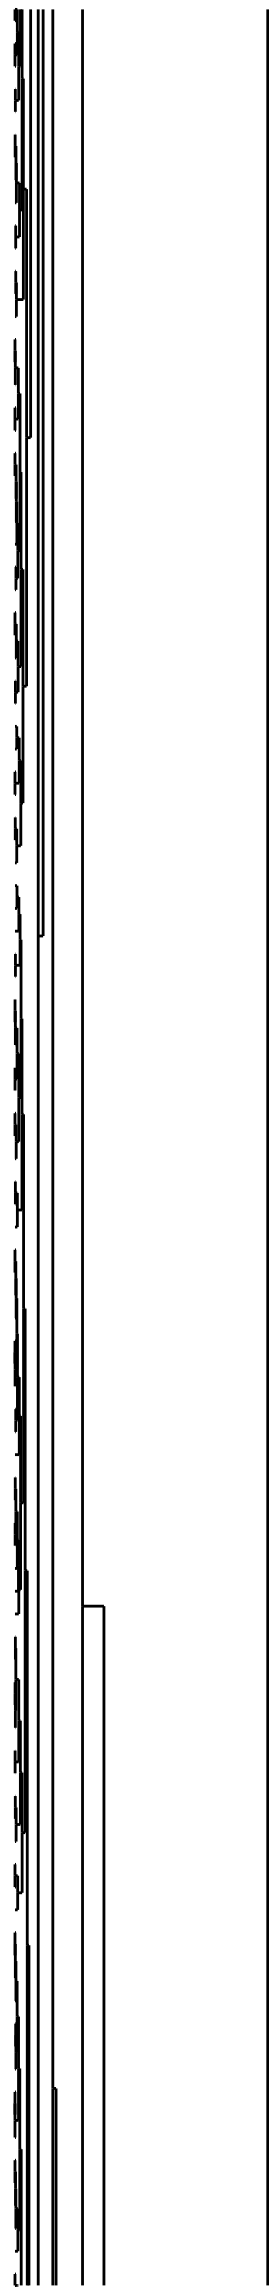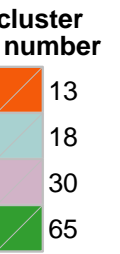

alanine -  
 aspartate -  
 glutamate -  
 phenylalanine -  
 glycine -  
 histidine -  
 isoleucine -  
 lysine -  
 leucine -  
 methionine -  
 asparagine -  
 proline -  
 glutamine -  
 arginine -  
 serine -  
 threonine -  
 valine -  
 tryptophan -  
 tyrosine -  
 cluster -

YOL038C-A  
 YLR361C-A  
 YDL124W  
 IZH3 YLR023C  
 MFG1 YDL233W  
 CPR8 YNR028W  
 MMP1 YLL061W  
 YJR037W  
 YDL177C  
 ARF2 YDL137W  
 APQ13 YJL075C  
 TOS3 YGL179C  
 AZR1 YGR224W  
 YGR161W-C  
 YOR034C-A  
 YDR131C  
 PDC1 YLR044C  
 YCL022C  
 CIN1 YOR349W  
 GMH1 YKR030W  
 YER046W-A  
 TRK1 YJL129C  
 OSH7 YHR001W  
 HHT1 YBR010W  
 DAN1 YJR150C  
 AIM23 YJL131C  
 RPS1B YML063W  
 MRPL37 YBR268W  
 ARO4 YBR249C  
 THI2 YBR240C  
 PTC4 YBR125C  
 ALG5 YPL227C  
 YBR241C  
 ERT1 YBR239C  
 MDY2 YOL111C  
 YLR326W  
 TOS6 YNL300W  
 YPL107W  
 BER1 YLR412W  
 MKC7 YDR144C  
 PAC1 YOR269W  
 COY1 YKL179C  
 YIL086C  
 ECM22 YLR228C  
 LHS1 YKL073W  
 RPL41B YDL133C-A  
 TRM11 YOL124C  
 MMS2 YGL087C  
 YLR217W  
 CPR6 YLR216C  
 RSM25 YIL093C  
 VAN1 YML115C  
 SSM4 YIL030C  
 CBR1 YIL043C  
 ITR2 YOL103W  
 SMM1 YNR015W  
 YPL225W  
 YOL085C  
 YGL042C  
 UBC7 YMR022W  
 PIF1 YML061C  
 RGS2 YOR107W  
 FAR10 YLR238W  
 SHC1 YER096W  
 YBR232C  
 MSN2 YMR037C  
 PFK27 YOL136C  
 ECM9 YKR004C  
 YMR247W-A  
 YLR412C-A  
 RTT10 YPL183C  
 YPS5 YGL259W  
 PIR5 YJL160C  
 SHE10 YGL228W  
 CTF3 YLR381W  
 YIR007W  
 DPB3 YBR278W  
 YBR277C  
 YKL053W  
 MPT5 YGL178W  
 VMS1 YDR049W  
 AIM25 YJR100C  
 UBX5 YDR330W  
 RPN4 YDL020C  
 YIL152W  
 PBY1 YBR094W  
 GSY2 YLR258W  
 MET32 YDR253C  
 TRX3 YCR083W  
 SED4 YCR067C  
 ERS1 YCR075C  
 ERF2 YLR246W  
 MRPS28 YDR337W  
 TCB2 YNL087W  
 PSO2 YMR137C  
 COS6 YGR295C  
 CIN4 YMR138W  
 IGO2 YHR132W-A  
 ERV2 YPR037C  
 SNO4 YMR322C

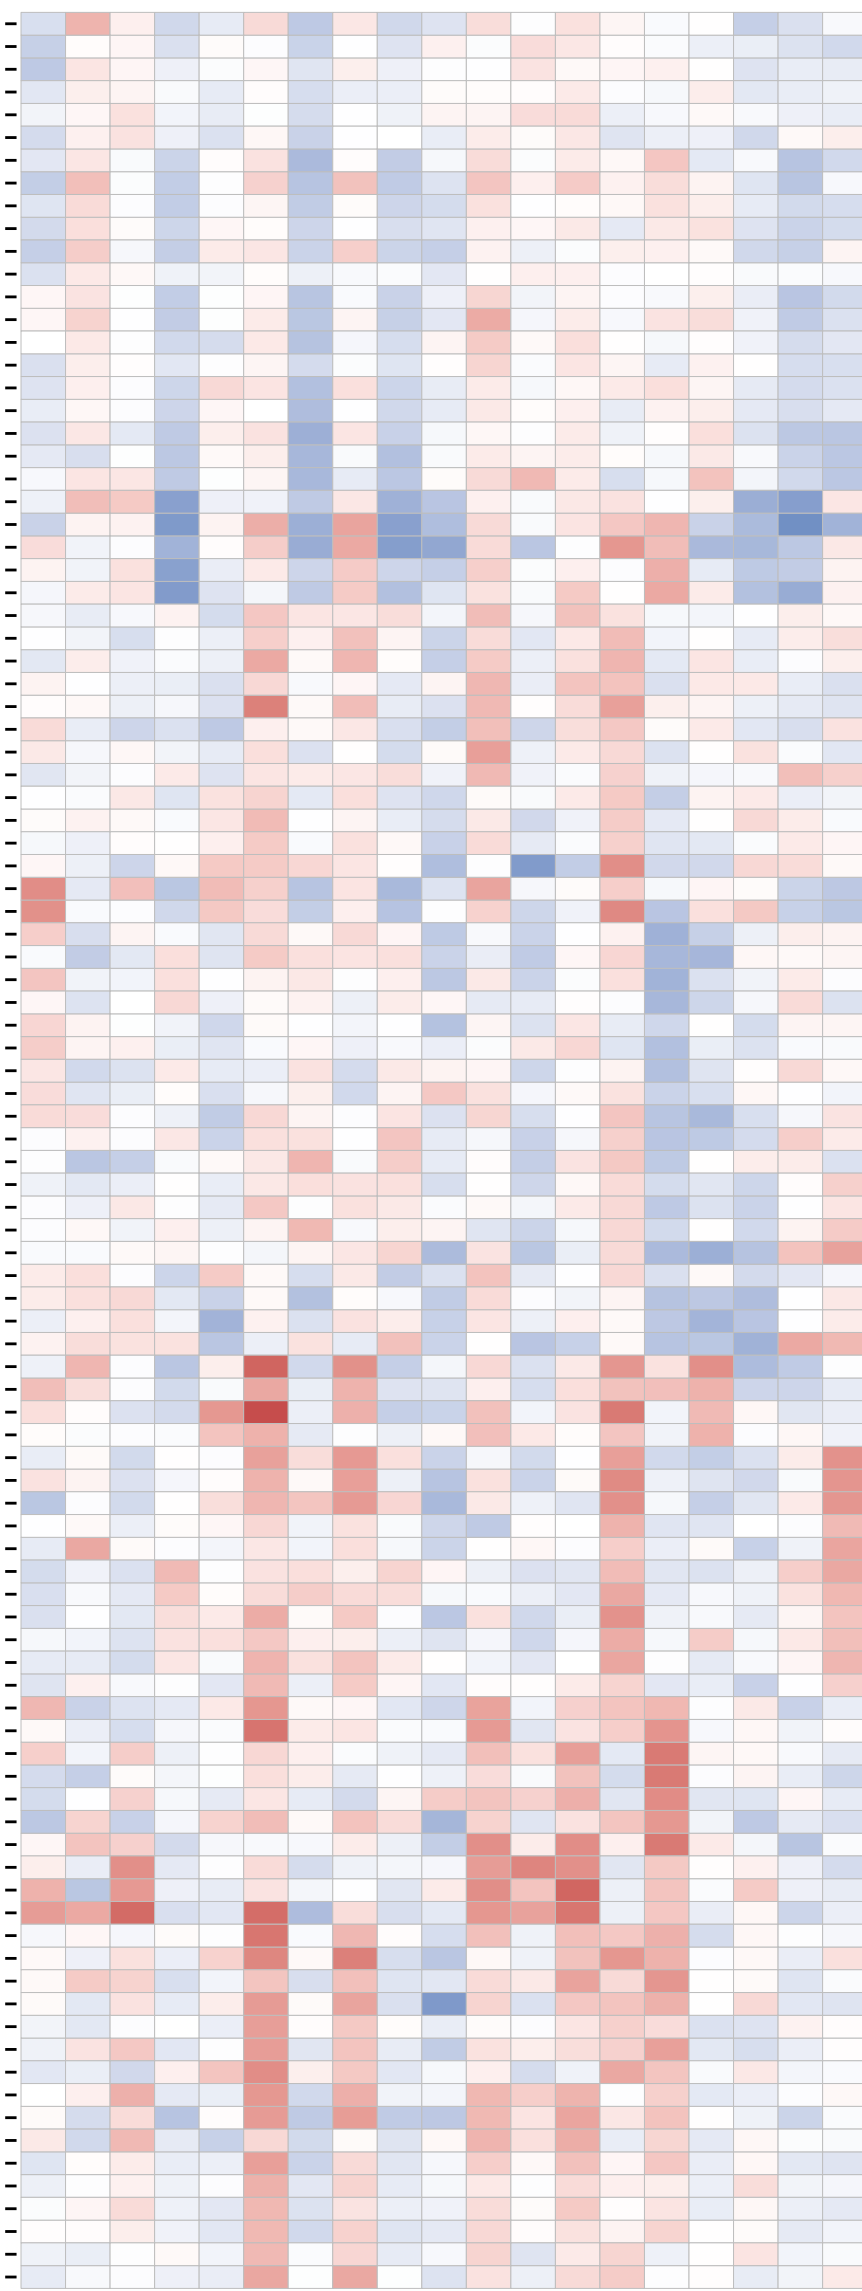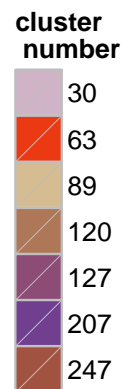

alanine -  
 aspartate -  
 glutamate -  
 phenylalanine -  
 glycine -  
 histidine -  
 isoleucine -  
 lysine -  
 leucine -  
 methionine -  
 asparagine -  
 proline -  
 glutamine -  
 arginine -  
 serine -  
 threonine -  
 valine -  
 tryptophan -  
 tyrosine -  
 cluster -

RAD34 YDR314C  
 GRX1 YCL035C  
 RCM1 YNL022C  
 WAR1 YML076C  
 SSK22 YCR073C  
 YMD8 YML038C  
 DUG1 YFR044C  
 PAU24 YBR301W  
 CHL4 YDR254W  
 CAF40 YNL288W  
 TOR1 YJR066W  
 RSM7 YJR113C  
 URA7 YBL039C  
 CTF19 YPL018W  
 CKB1 YGL019W  
 CHS5 YLR330W  
 HAT2 YEL056W  
 CTH1 YDR151C  
 YDR306C  
 DTR1 YBR180W  
 YNR021W  
 HHF2 YNL030W  
 SGS1 YMR190C  
 MRE11 YMR224C  
 LCB4 YOR171C  
 YIL092W  
 PIN2 YOR104W  
 NMD4 YLR363C  
 YDR102C  
 GDB1 YPR184W  
 PUF2 YPR042C  
 SOP4 YJL192C  
 AGA2 YGL032C  
 OAR1 YKL055C  
 VHR2 YER064C  
 BSC6 YOL137W  
 TPO5 YKL174C  
 YNK1 YKL067W  
 APN1 YKL114C  
 YKL077W  
 YKR032W  
 STE3 YKL178C  
 YGR226C  
 YKL177W  
 YPF1 YKL100C  
 ATG23 YLR431C  
 YKL133C  
 HUL5 YGL141W  
 YKL106C-A  
 VEL1 YGL258W  
 YOR131C  
 MST27 YGL051W  
 CLB1 YGR108W  
 YPR196W  
 SDS23 YGL056C  
 HAT1 YPL001W  
 TMA10 YLR327C  
 RTC4 YNL254C  
 PAA1 YDR071C  
 YSP1 YHR155W  
 SAW1 YAL027W  
 RTT107 YHR154W  
 ARE1 YCR048W  
 SSK2 YNR031C  
 YOR111W  
 YBR012C  
 YLR252W  
 YKL107W  
 YFR020W  
 SPO77 YLR341W  
 YGR107W  
 SVP26 YHR181W  
 CPR5 YDR304C  
 ALD4 YOR374W  
 AKR1 YDR264C  
 YDR262W  
 ATF1 YOR377W  
 YIP5 YGL161C  
 YOL099C  
 TDA7 YNL176C  
 SNT2 YGL131C  
 MIX14 YDR031W  
 ASK10 YGR097W  
 YBL094C  
 NPT1 YOR209C  
 CKB2 YOR039W  
 YGR122W  
 SPS2 YDR522C  
 PEP5 YMR231W  
 RAD16 YBR114W  
 TMA20 YER007C-A  
 YKR015C  
 SSF2 YDR312W  
 YKU80 YMR106C  
 MYO5 YMR109W  
 YML131W  
 GLC3 YEL011W  
 RFS1 YBR052C  
 ERC1 YHR032W  
 YDR387C

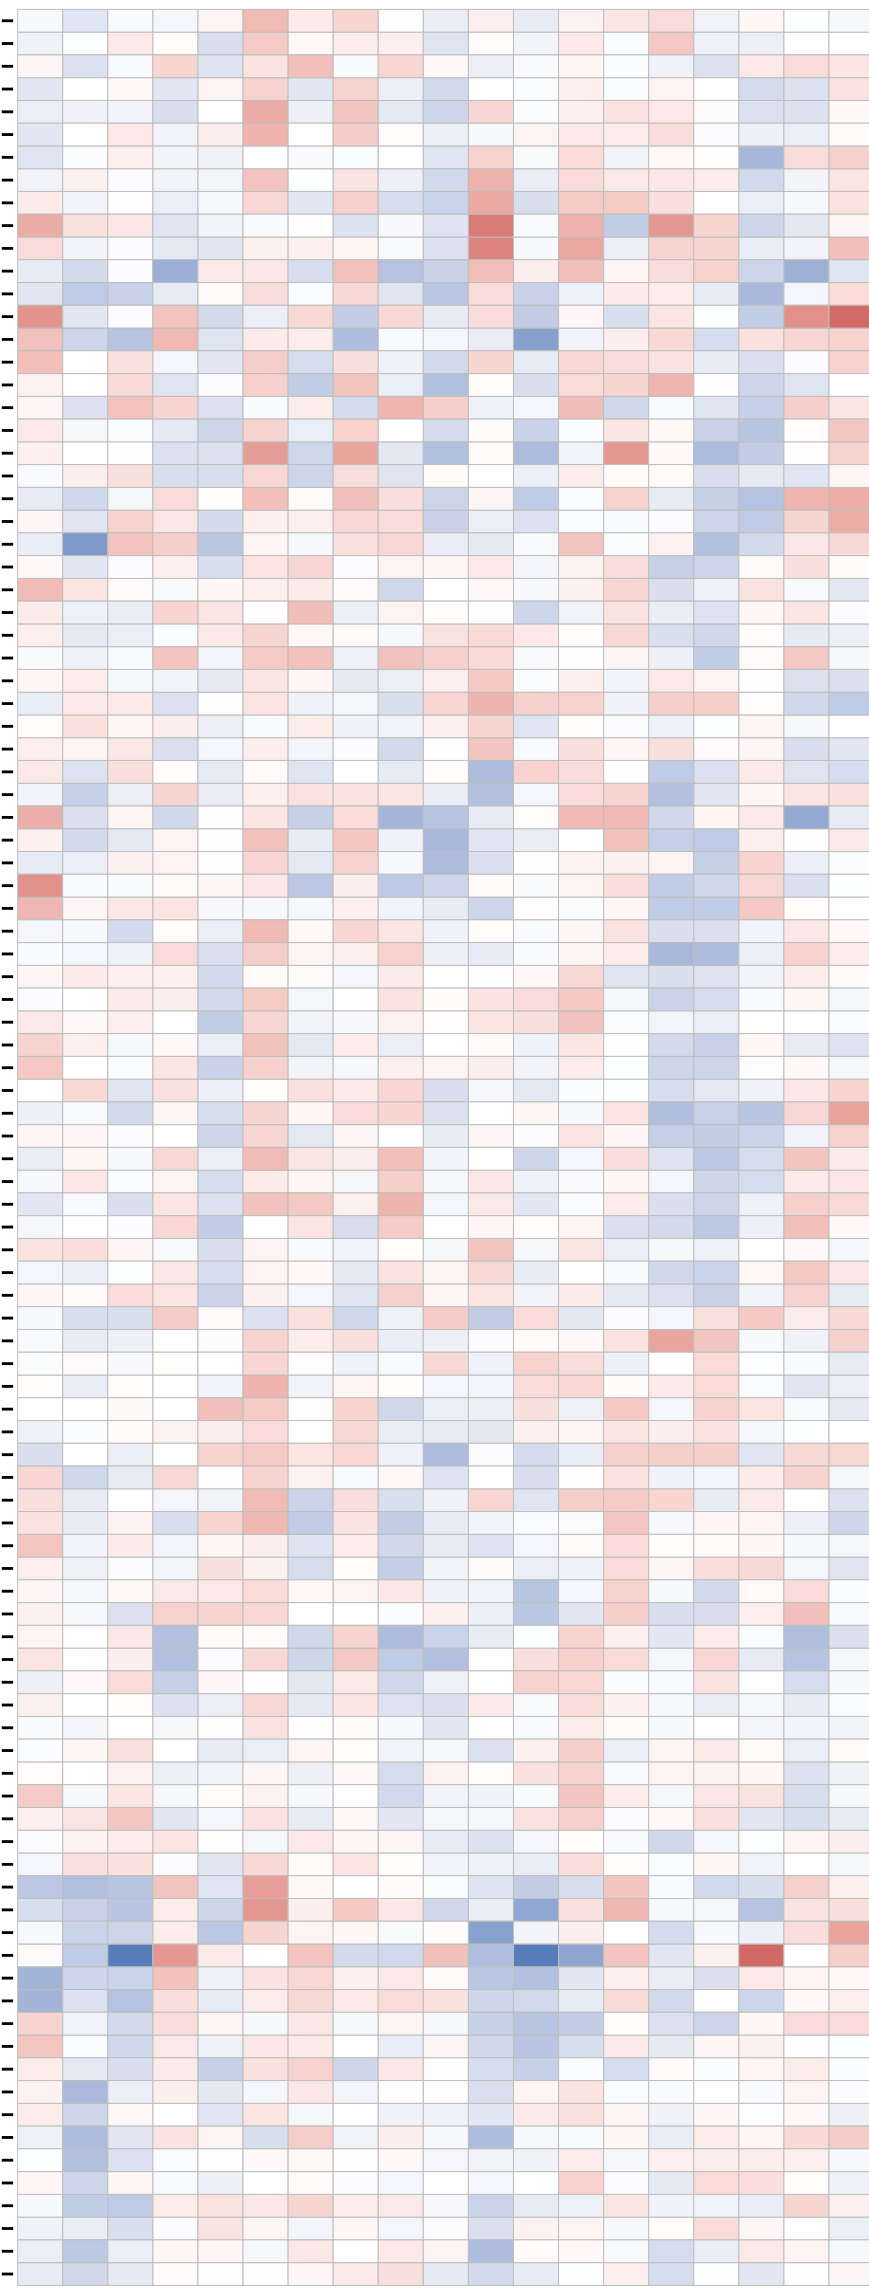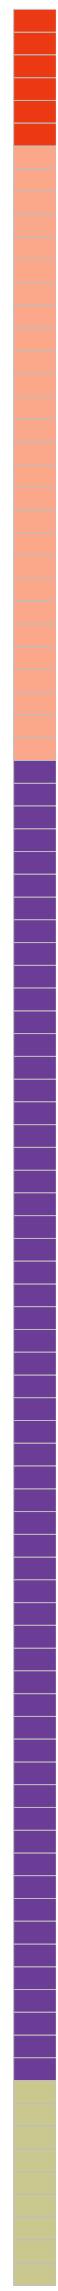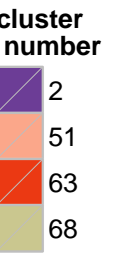

alanine -  
 aspartate -  
 glutamate -  
 phenylalanine -  
 glycine -  
 histidine -  
 isoleucine -  
 lysine -  
 leucine -  
 methionine -  
 asparagine -  
 proline -  
 glutamine -  
 arginine -  
 serine -  
 threonine -  
 valine -  
 tryptophan -  
 tyrosine -  
 cluster -

WSC3 YOL105C  
 AIM36 YMR157C  
 YRO2 YBR054W  
 POA1 YBR022W  
 YOL106W  
 STD1 YOR047C  
 YBR138C  
 MDH2 YOL126C  
 MCH2 YKL221W  
 MIC60 YKR016W  
 PMT7 YDR307W  
 YDR274C  
 SRY1 YKL218C  
 YHR045W  
 OSW5 YMR148W  
 YDR269C  
 IOC4 YMR044W  
 YIL001W  
 DON1 YDR273W  
 BIT2 YBR270C  
 MIS1 YBR084W  
 YKU70 YMR284W  
 ZIP1 YDR285W  
 HIM1 YDR317W  
 SCS2 YER120W  
 YER119C-A  
 HPF1 YOL155C  
 YGL159W  
 GRE2 YOL151W  
 CST9 YLR394W  
 DCG1 YIR030C  
 PRM6 YML047C  
 MEP2 YNL142W  
 YNL140C  
 LEU9 YOR108W  
 GEX2 YKR106W  
 SCW10 YMR305C  
 CAT2 YML042W  
 DFM1 YDR411C  
 HSV2 YGR223C  
 COG1 YGL223C  
 COX14 YML129C  
 AGE2 YIL044C  
 BPH1 YCR032W  
 YLR346C  
 MTH1 YDR277C  
 PTC5 YOR090C  
 SUL1 YBR294W  
 FMP27 YLR454W  
 YGR039W  
 DLD3 YEL071W  
 CCW14 YLR390W-A  
 PIG2 YIL045W  
 YOR289W  
 YKR033C  
 SEG2 YKL105C  
 YIL025C  
 MRX8 YDR336W  
 YDR286C  
 SNL1 YIL016W  
 YOR121C  
 CAR2 YLR438W  
 RNH202 YDR279W  
 FMP48 YGR052W  
 OSW2 YLR054C  
 ACH1 YBL015W  
 MIC27 YNL100W  
 YFR045W  
 YCL002C  
 SWH1 YAR042W  
 YLR050C  
 AMA1 YGR225W  
 MBF1 YOR298C-A  
 YGR035C  
 PTH4 YOL114C  
 YBR259W  
 HMG2 YLR450W  
 MMS4 YBR098W  
 YPT52 YKR014C  
 VHC1 YBR235W  
 RAX1 YOR301W  
 MNN4 YKL201C  
 YGL217C  
 LAM6 YLR072W  
 IES3 YLR052W  
 CMR3 YPR013C  
 LSB3 YFR024C-A  
 MBB1 YJL199C  
 RAS1 YOR101W  
 ECM5 YMR176W  
 YKL202W  
 DRN1 YGR093W  
 EPO1 YMR124W  
 YKL068W-A  
 GAL7 YBR018C  
 JJJ1 YNL227C  
 YIM2 YMR151W  
 YIL024C  
 RPL4A YBR031W  
 MRP2 YPR166C

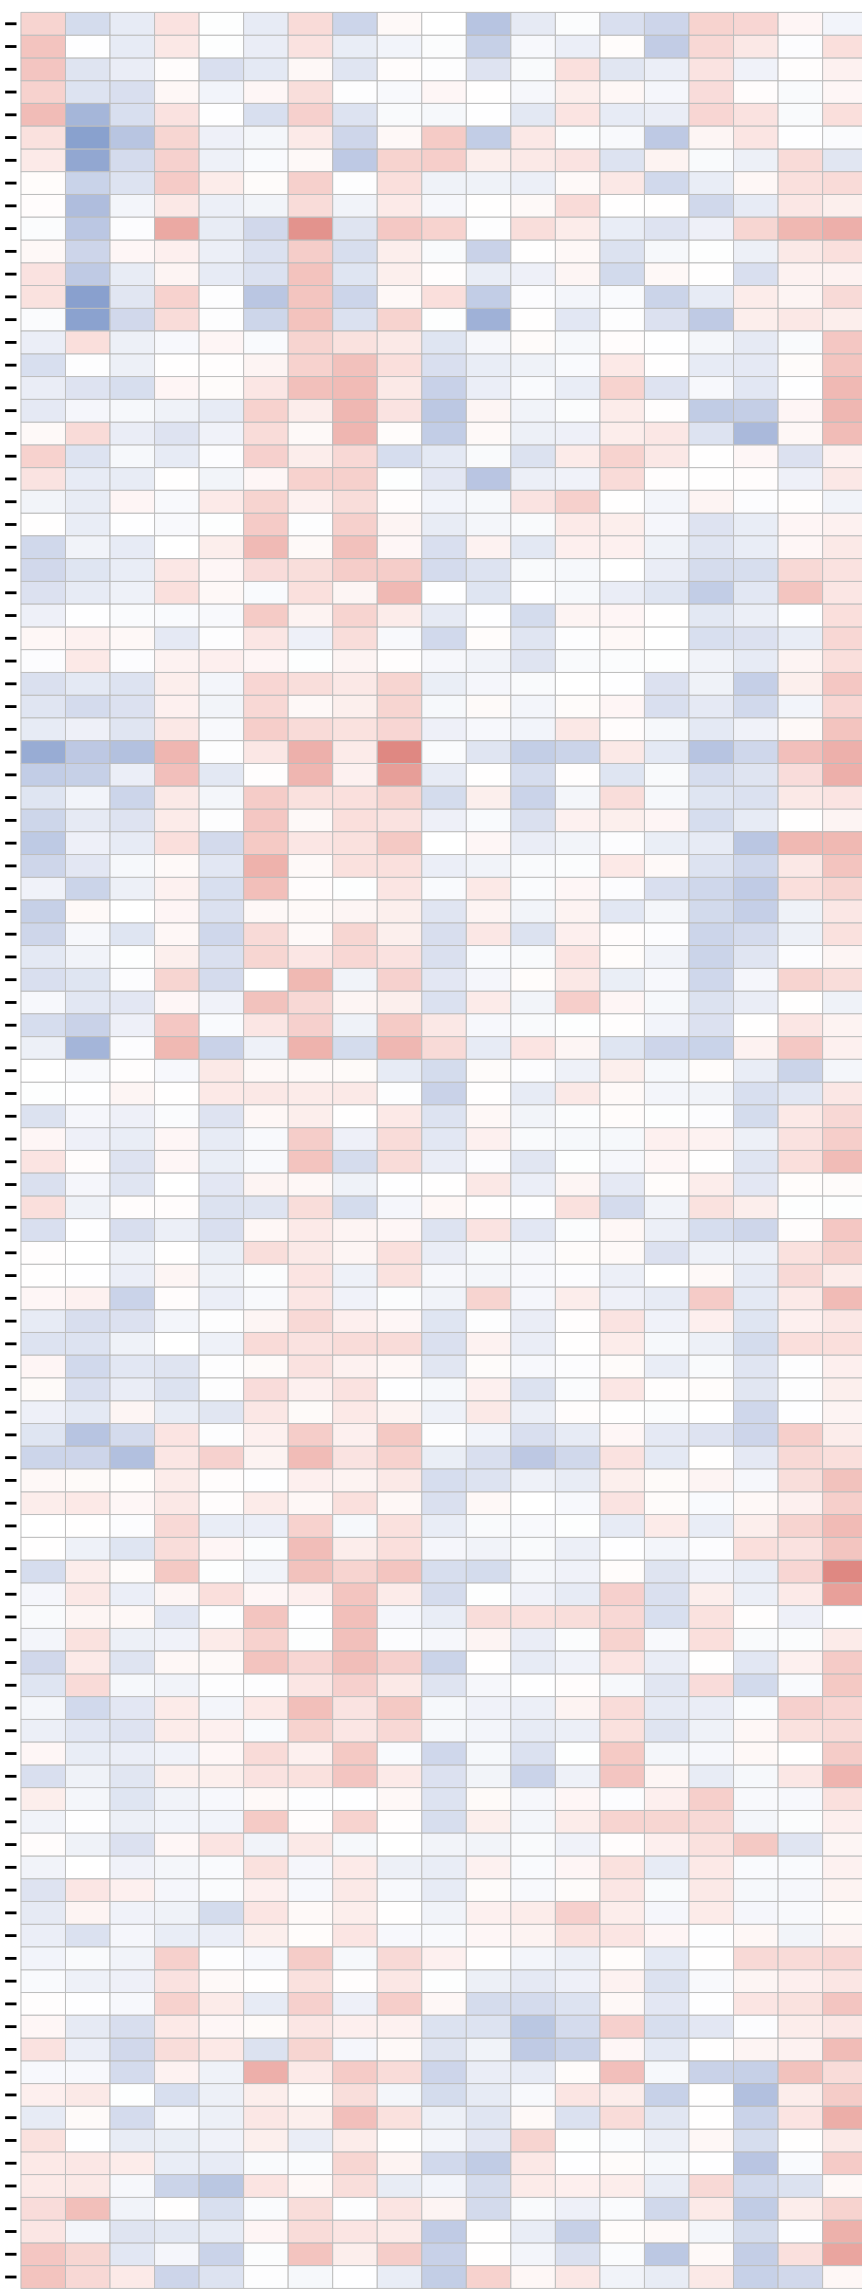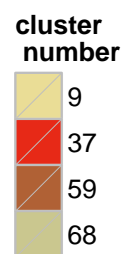

alanine -  
 aspartate -  
 glutamate -  
 phenylalanine -  
 glycine -  
 histidine -  
 isoleucine -  
 lysine -  
 leucine -  
 methionine -  
 asparagine -  
 proline -  
 glutamine -  
 arginine -  
 serine -  
 threonine -  
 valine -  
 tryptophan -  
 tyrosine -  
 cluster -

MSN4 YKL062W  
 YOR333C  
 ATP18 YML081C-A  
 MRPL39 YML009C  
 MRP49 YKL167C  
 YDR445C  
 YBR113W  
 TBS1 YBR150C  
 HSP82 YPL240C  
 NFI1 YOR156C  
 YPR011C  
 UPS1 YLR193C  
 YNL208W  
 STB6 YKL072W  
 YMR181C  
 RKM1 YPL208W  
 SPG1 YGR236C  
 INM2 YDR287W  
 GLO2 YDR272W  
 YEL068C  
 TAH1 YCR060W  
 HST2 YPL015C  
 YBR144C  
 GAL10 YBR019C  
 YBR016W  
 DNF3 YMR162C  
 YMR147W  
 HLJ1 YMR161W  
 AIM45 YPR004C  
 SIP3 YNL257C  
 WHI2 YOR043W  
 YLR031W  
 MSC2 YDR205W  
 YMR244W  
 ATG16 YMR159C  
 YOR302W  
 AGX1 YFL030W  
 SNA3 YJL151C  
 PIB1 YDR313C  
 YKL131W  
 SFG1 YOR315W  
 DYN2 YDR424C  
 FBP26 YJL155C  
 TVP38 YKR088C  
 IRC9 YJL142C  
 ICY2 YPL250C  
 YJL163C  
 UBP7 YIL156W  
 HOT13 YKL084W  
 YER152C  
 TUS1 YLR425W  
 RPB4 YJL140W  
 NSR1 YGR159C  
 CUP9 YPL177C  
 SNC1 YAL030W  
 YER085C  
 YJR149W  
 YHR180W  
 PSK2 YOL045W  
 GYP7 YDL234C  
 PTP1 YDL230W  
 ISW2 YOR304W  
 RUD3 YOR216C  
 PCL6 YER059W  
 SAP1 YER047C  
 PES4 YFR023W  
 YMR122C  
 IRC2 YDR112W  
 YER079W  
 PHO13 YDL236W  
 PCA1 YBR295W  
 SAS2 YMR127C  
 DAK1 YML070W  
 YAP1 YML007W  
 SKS1 YPL026C  
 DAS1 YJL149W  
 TMA64 YDR117C  
 ACF4 YJR083C  
 YGL081W  
 HAL5 YJL165C  
 FAT1 YBR041W  
 BTN2 YGR142W  
 PIL1 YGR086C  
 EMC1 YCL045C  
 YOR186W  
 JJJ2 YJL162C  
 ACA1 YER045C  
 YAT2 YER024W  
 YER034W  
 MNN5 YJL186W  
 PRM4 YPL156C  
 SPT23 YKL020C  
 PMU1 YKL128C  
 DET1 YDR051C  
 SPL2 YHR136C  
 YFL019C  
 MHP1 YJL042W  
 ZNF1 YFL052W  
 NAM8 YHR086W  
 FIT2 YOR382W

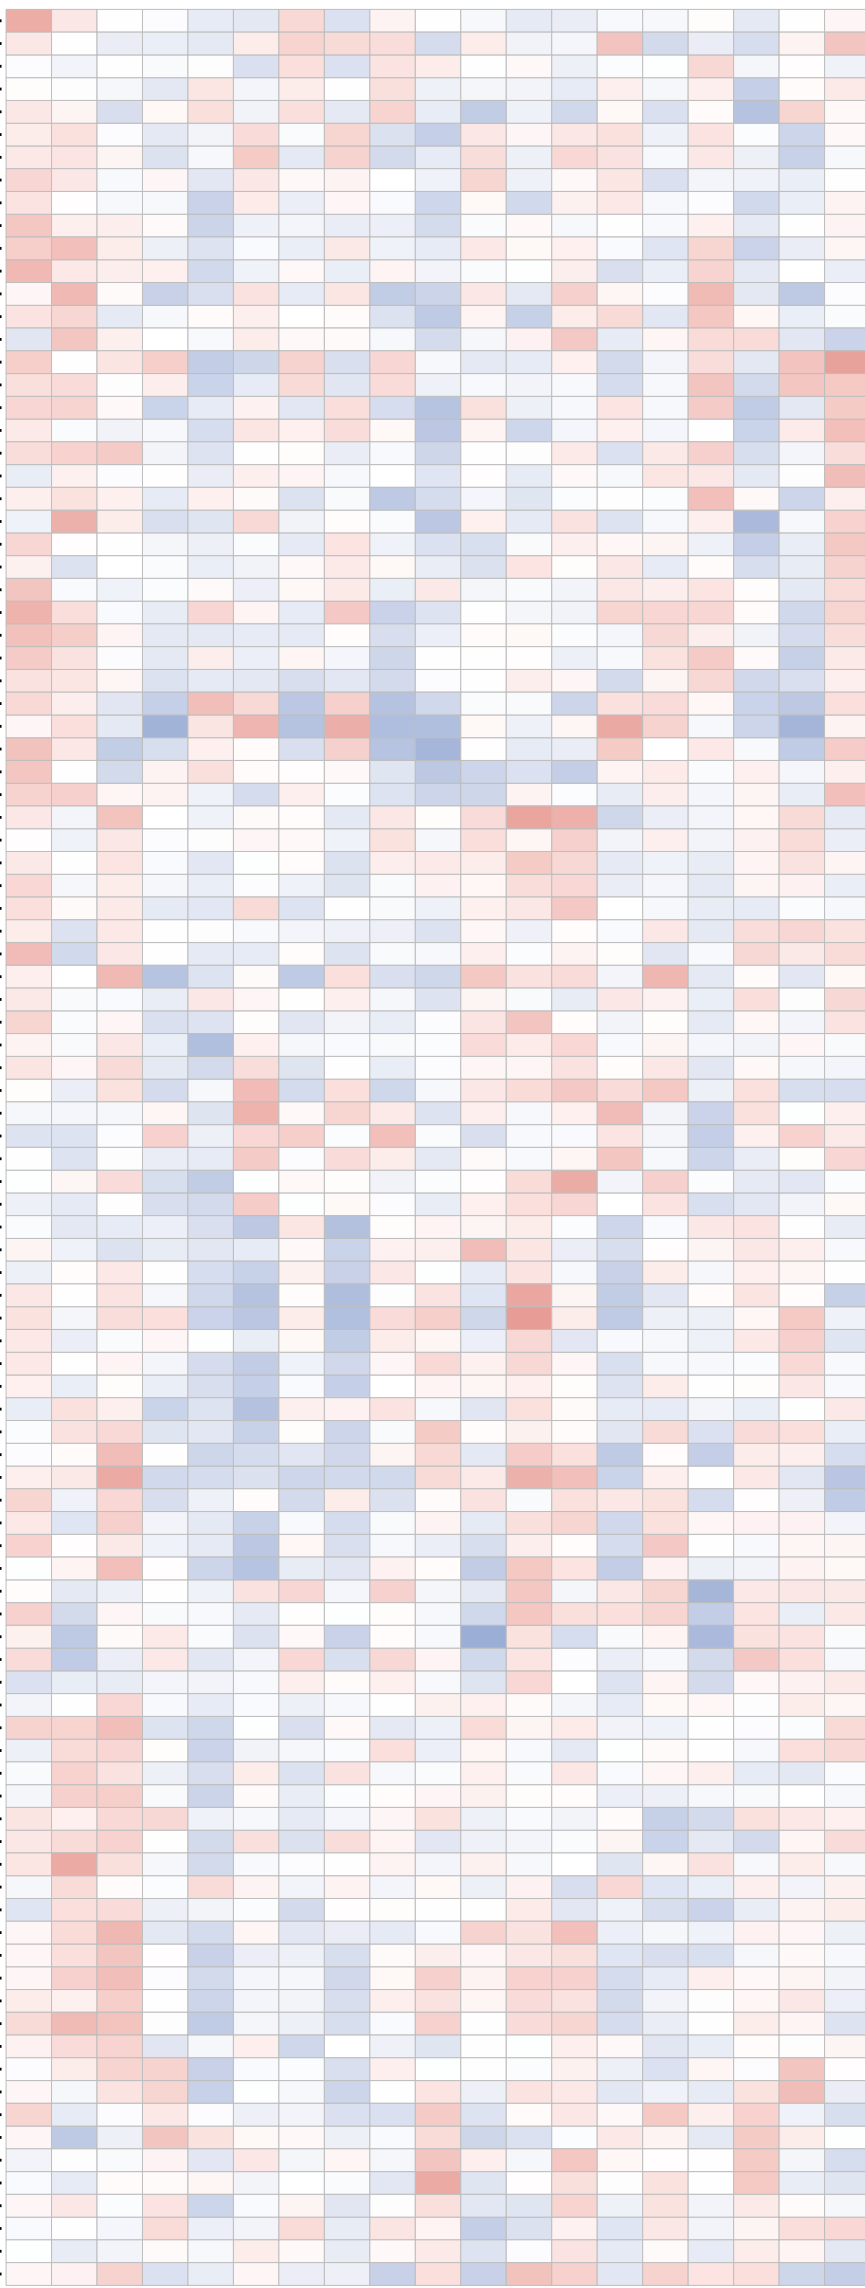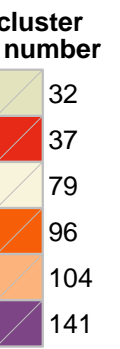

alanine -  
 aspartate -  
 glutamate -  
 phenylalanine -  
 glycine -  
 histidine -  
 isoleucine -  
 lysine -  
 leucine -  
 methionine -  
 asparagine -  
 proline -  
 glutamine -  
 arginine -  
 serine -  
 threonine -  
 valine -  
 tryptophan -  
 tyrosine -  
 cluster -



BRE4 YDL231C  
 MKK1 YOR231W  
 HRD1 YOL013C  
 IGD1 YFR017C  
 AIM21 YIR003W  
 FAU1 YER183C  
 YHL012W  
 HST4 YDR191W  
 YIR016W  
 REV7 YIL139C  
 YKR045C  
 SNA4 YDL123W  
 PMP1 YCR024C-A  
 SAL1 YNL083W  
 YIR014W  
 AGP3 YFL055W  
 PAD1 YDR538W  
 INA1 YLR413W  
 YNR063W  
 FCY21 YER060W  
 IML2 YJL082W  
 DGA1 YOR245C  
 DSD1 YGL196W  
 YPR096C  
 PRY2 YKR013W  
 GAL2 YLR081W  
 NPC2 YDL046W  
 RUP1 YOR138C  
 AKL1 YBR059C  
 PHO84 YML123C  
 RRT8 YOL048C  
 PFF1 YBR074W  
 YIR018C-A  
 ZTA1 YBR046C  
 IDH1 YNL037C  
 ROM2 YLR371W  
 SCS22 YBL091C-A  
 YOR050C  
 YML079W  
 YOR385W  
 YML047W-A  
 SLX8 YER116C  
 CDA1 YLR307W  
 PTK1 YKL198C  
 YDR215C  
 YER187W  
 SDH4 YDR178W  
 RRF1 YHR038W  
 PDR1 YGL013C  
 BBC1 YJL020C  
 GPA2 YER020W  
 YKL151C  
 CUE2 YKL090W  
 SIP18 YMR175W  
 YGL199C  
 SPO16 YHR153C  
 PEX28 YHR150W  
 PDC5 YLR134W  
 RTA1 YGR213C  
 RKM5 YLR137W  
 YLR049C  
 YOR365C  
 YLL058W  
 YJL181W  
 NTH2 YBR001C  
 YNR068C  
 YNL134C  
 PSR2 YLR019W  
 MF(ALPHA)2 YGL089C  
 RAD18 YCR066W  
 FKS3 YMR306W  
 BMT6 YLR063W  
 YLR053C  
 FMP23 YBR047W  
 RKM2 YDR198C  
 YPR130C  
 AMD1 YML035C  
 SBH1 YER087C-B  
 SRF1 YDL133W  
 TEP1 YNL128W  
 SYG1 YIL047C  
 YLR126C  
 GPX1 YKL026C  
 CAP1 YKL007W  
 YGR035W-A  
 YDL129W  
 YHR139C-A  
 YCL001W-B  
 FMP46 YKR049C  
 ELO1 YJL196C  
 YIH1 YCR059C  
 SHE3 YBR130C  
 FRT2 YAL028W  
 YNL234W  
 RCE1 YMR274C  
 VTC3 YPL019C  
 NTH1 YDR001C  
 TPO4 YOR273C  
 YNR065C  
 FMP33 YJL161W

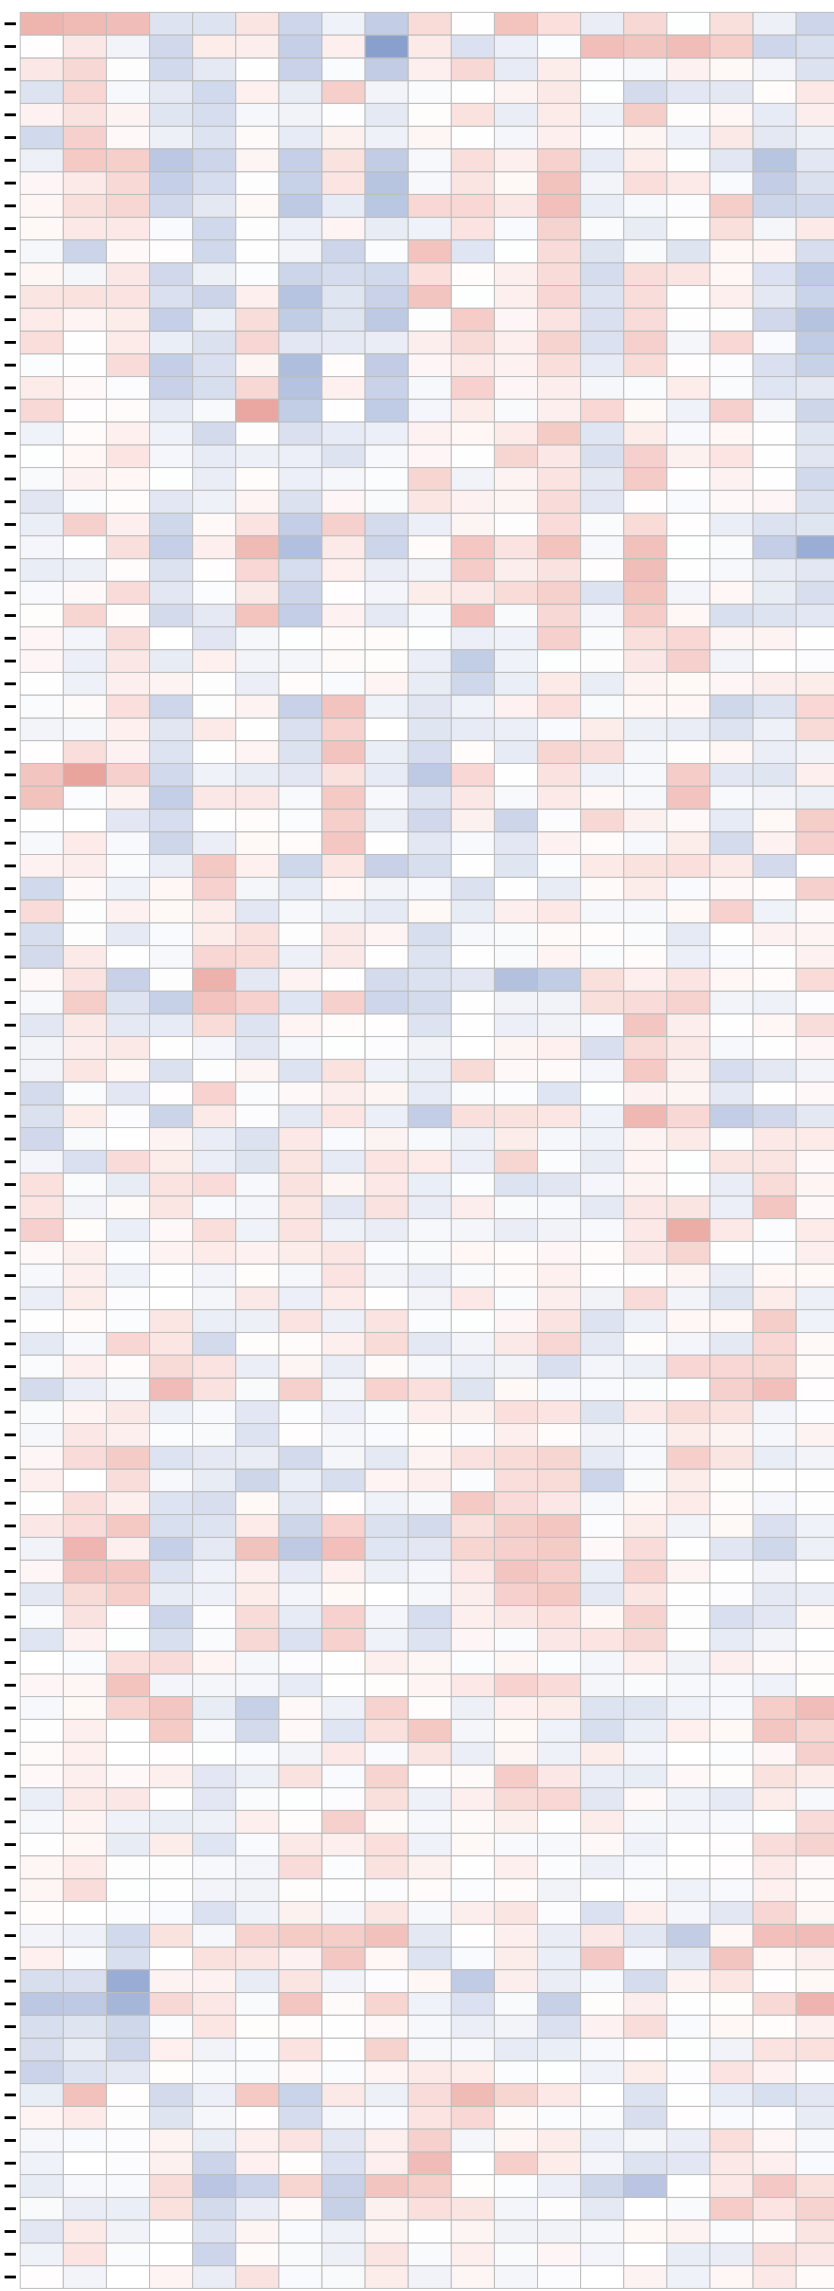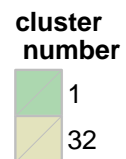

alanine -  
 aspartate -  
 glutamate -  
 phenylalanine -  
 glycine -  
 histidine -  
 isoleucine -  
 lysine -  
 leucine -  
 methionine -  
 asparagine -  
 proline -  
 glutamine -  
 arginine -  
 serine -  
 threonine -  
 valine -  
 tryptophan -  
 tyrosine -  
 cluster -

YDL218W  
 ICY1 YMR195W  
 JEN1 YKL217W  
 YML018C  
 ECM38 YLR299W  
 UTR2 YEL040W  
 NUP42 YDR192C  
 YCR001W  
 YPR197C  
 TRM12 YML005W  
 SKN1 YGR143W  
 YDL109C  
 RIM13 YMR154C  
 PYK2 YOR347C  
 UBC11 YOR339C  
 ARG82 YDR173C  
 CLB3 YDL155W  
 IZH2 YOL002C  
 SAC6 YDR129C  
 YOR318C  
 ALD2 YMR170C  
 GTT2 YLL060C  
 TRM3 YDL112W  
 YNL277W-A  
 DOT1 YDR440W  
 VAB2 YEL005C  
 YLR001C  
 NDI1 YML120C  
 CMC1 YKL137W  
 GCN2 YDR283C  
 PHO90 YJL198W  
 YBR063C  
 SCM4 YGR049W  
 OPI6 YDL096C  
 FRE8 YLR047C  
 YHR033W  
 SNZ1 YMR096W  
 YCL042W  
 PDR10 YOR328W  
 PRM9 YAR031W  
 PRY3 YJL078C  
 UBX7 YBR273C  
 POM34 YLR018C  
 YLR012C  
 ERG24 YNL280C  
 UBI4 YLL039C  
 RCN2 YOR220W  
 APJ1 YNL077W  
 PHR1 YOR386W  
 CWH43 YCR017C  
 YJL070C  
 EFM5 YGR001C  
 HAM1 YJR069C  
 YCR101C  
 YDL073W  
 COM2 YER130C  
 UBC13 YDR092W  
 YGR015C  
 MPC54 YOR177C  
 COS111 YBR203W  
 YDR535C  
 TOS4 YLR183C  
 RRT5 YFR032C  
 TRM2 YKR056W  
 THI72 YOR192C  
 MRX5 YJL147C  
 ASG1 YIL130W  
 ARF3 YOR094W  
 PTM1 YKL039W  
 YNL162W-A  
 YLR236C  
 SSP120 YLR250W  
 ADP1 YCR011C  
 YPR092W  
 EAR1 YMR171C  
 SAK1 YER129W  
 ECI1 YLR284C  
 MCP2 YLR253W  
 JHD2 YJR119C  
 YLR278C  
 YLR407W  
 CTR1 YPR124W  
 BUD20 YLR074C  
 ARA2 YMR041C  
 YDL157C  
 BPT1 YLL015W  
 ENT3 YJR125C  
 MOT3 YMR070W  
 RPN13 YLR421C  
 YKL031W  
 SGN1 YIR001C  
 CLD1 YGR110W  
 DDR48 YMR173W  
 POF1 YCL047C  
 ATG8 YBL078C  
 YBL036C  
 RMA1 YKL132C  
 SOL4 YGR248W  
 MYO4 YAL029C  
 YKL115C

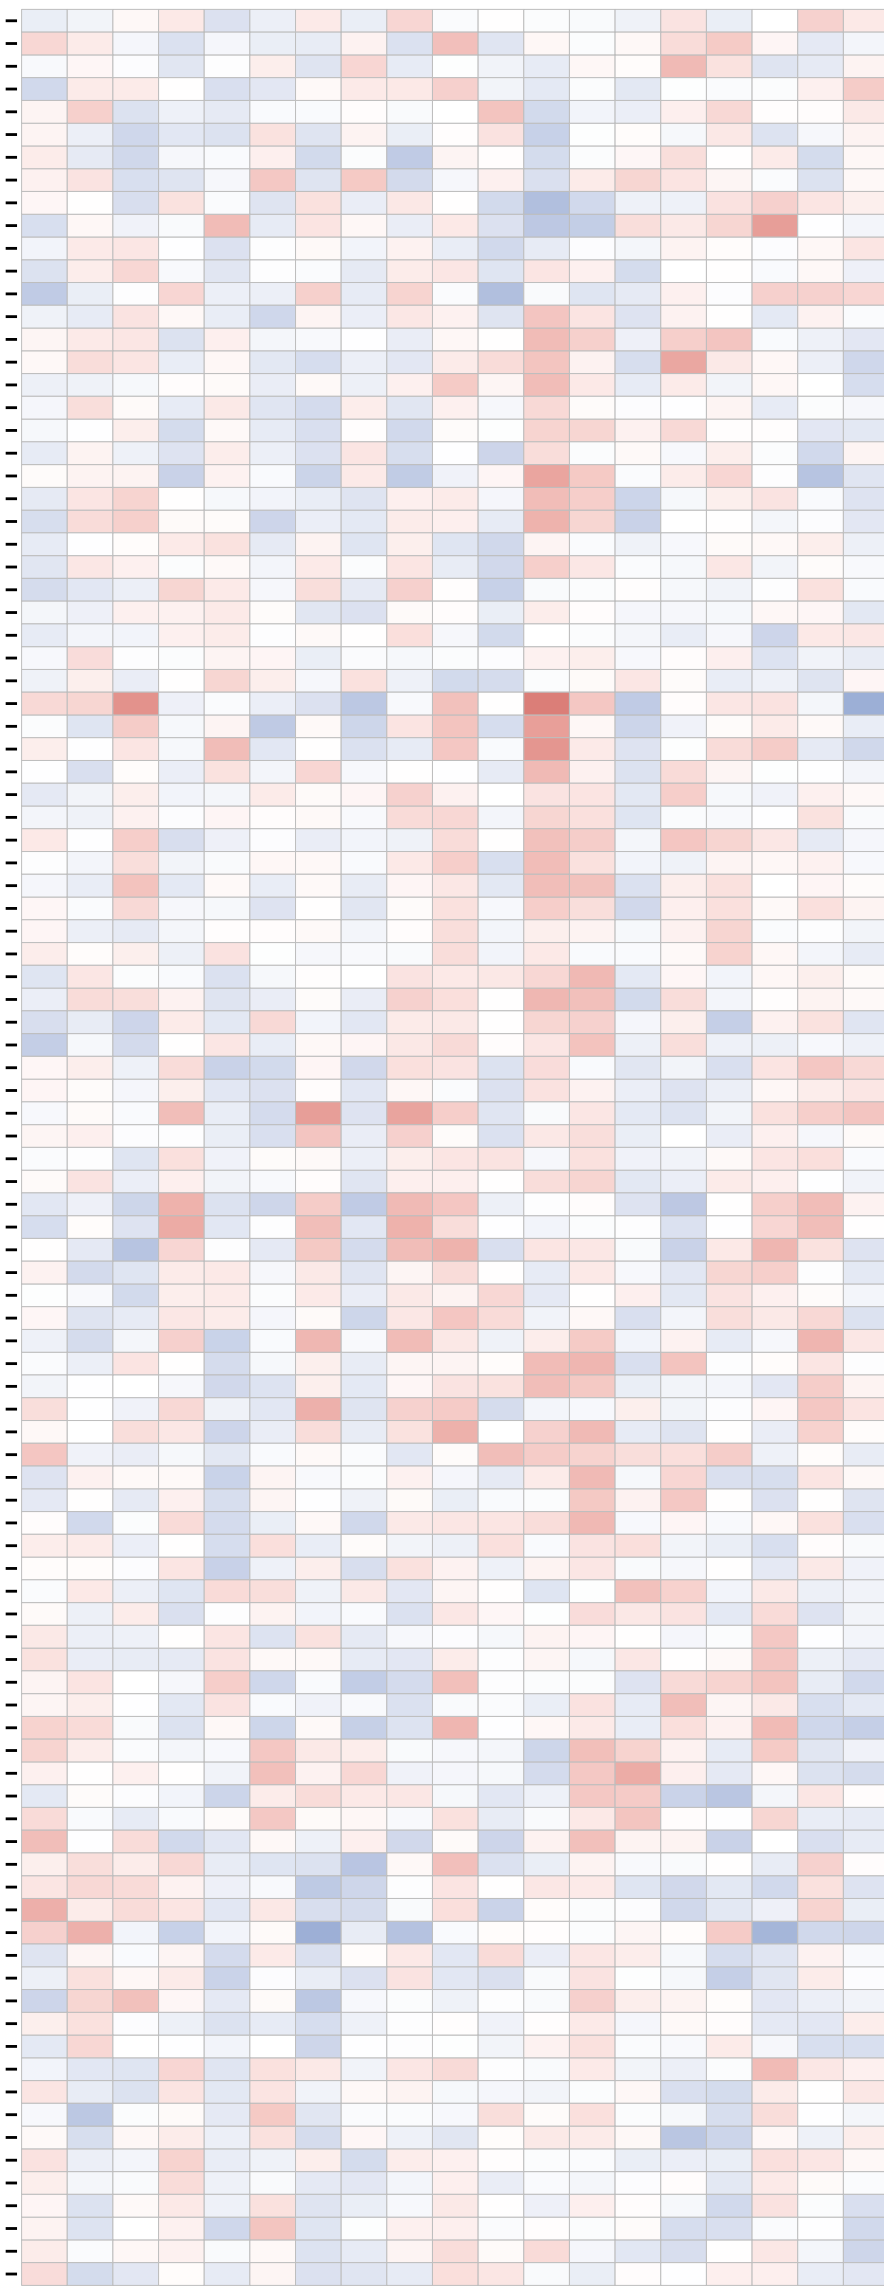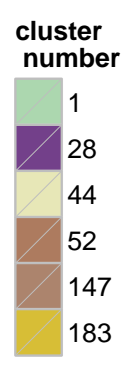

alanine -  
 aspartate -  
 glutamate -  
 phenylalanine -  
 glycine -  
 histidine -  
 isoleucine -  
 lysine -  
 leucine -  
 methionine -  
 asparagine -  
 proline -  
 glutamine -  
 arginine -  
 serine -  
 threonine -  
 valine -  
 tryptophan -  
 tyrosine -  
 cluster -

PTR2 YKR093W  
 YAL065C  
 MEK1 YOR351C  
 YGR117C  
 REC104 YHR157W  
 YRM1 YOR172W  
 GFD1 YMR255W  
 PET10 YKR046C  
 YGR021W  
 URA8 YJR103W  
 YPL088W  
 YGL262W  
 VBA1 YMR088C  
 AVO2 YMR068W  
 MRL1 YPR079W  
 YGR022C  
 YOL163W  
 ECM2 YBR065C  
 STF2 YGR008C  
 MEU1 YLR017W  
 RHB1 YCR027C  
 YFR018C  
 YGR149W  
 CAF16 YFL028C  
 THI73 YLR004C  
 YKL097C  
 PIR3 YKL163W  
 ABP1 YCR088W  
 MTC2 YKL098W  
 YKL066W  
 ENV10 YLR065C  
 YLL047W  
 RNP1 YLL046C  
 AYT1 YLL063C  
 YKL070W  
 DOT5 YIL010W  
 MDH1 YKL085W  
 YKL071W  
 CMS1 YLR003C  
 AQY2 YLL052C  
 SRL1 YOR247W  
 CNN1 YFR046C  
 STE13 YOR219C  
 YEH2 YLR020C  
 WTM2 YOR229W  
 RDS2 YPL133C  
 BMT2 YBR141C  
 ZRG8 YER033C  
 MAL31 YBR298C  
 CBT1 YKL208W  
 YKR012C  
 YDL186W  
 YOL014W  
 TDA10 YGR205W  
 FMP45 YDL222C  
 KKQ8 YKL168C  
 QCR9 YGR183C  
 DLD2 YDL178W  
 SAY1 YGR263C  
 YCR022C  
 ISN1 YOR155C  
 YCR007C  
 YOR342C  
 SPE4 YLR146C  
 XPT1 YJR133W  
 GIS1 YDR096W  
 PRR2 YDL214C  
 ECM19 YLR390W  
 ADY3 YDL239C  
 INM1 YHR046C  
 PPH3 YDR075W  
 CMP2 YML057W  
 SPS100 YHR139C  
 COX6 YHR051W  
 AXL1 YPR122W  
 AGP1 YCL025C  
 YDR338C  
 BSC4 YNL269W  
 QCR10 YHR001W-A  
 DDI3 YNL335W  
 ACB1 YGR037C  
 YOL013W-A  
 YLR296W  
 REX3 YLR107W  
 IDP2 YLR174W  
 SER33 YIL074C  
 BTT1 YDR252W  
 GSY1 YFR015C  
 PET18 YCR020C  
 YIL060W  
 YIL059C  
 SSP2 YOR242C  
 LSM12 YHR121W  
 AIM19 YIL087C  
 YDL242W  
 ENV7 YPL236C  
 SEO1 YAL067C  
 YFR012W-A  
 YBR056W-A  
 MAG2 YLR427W

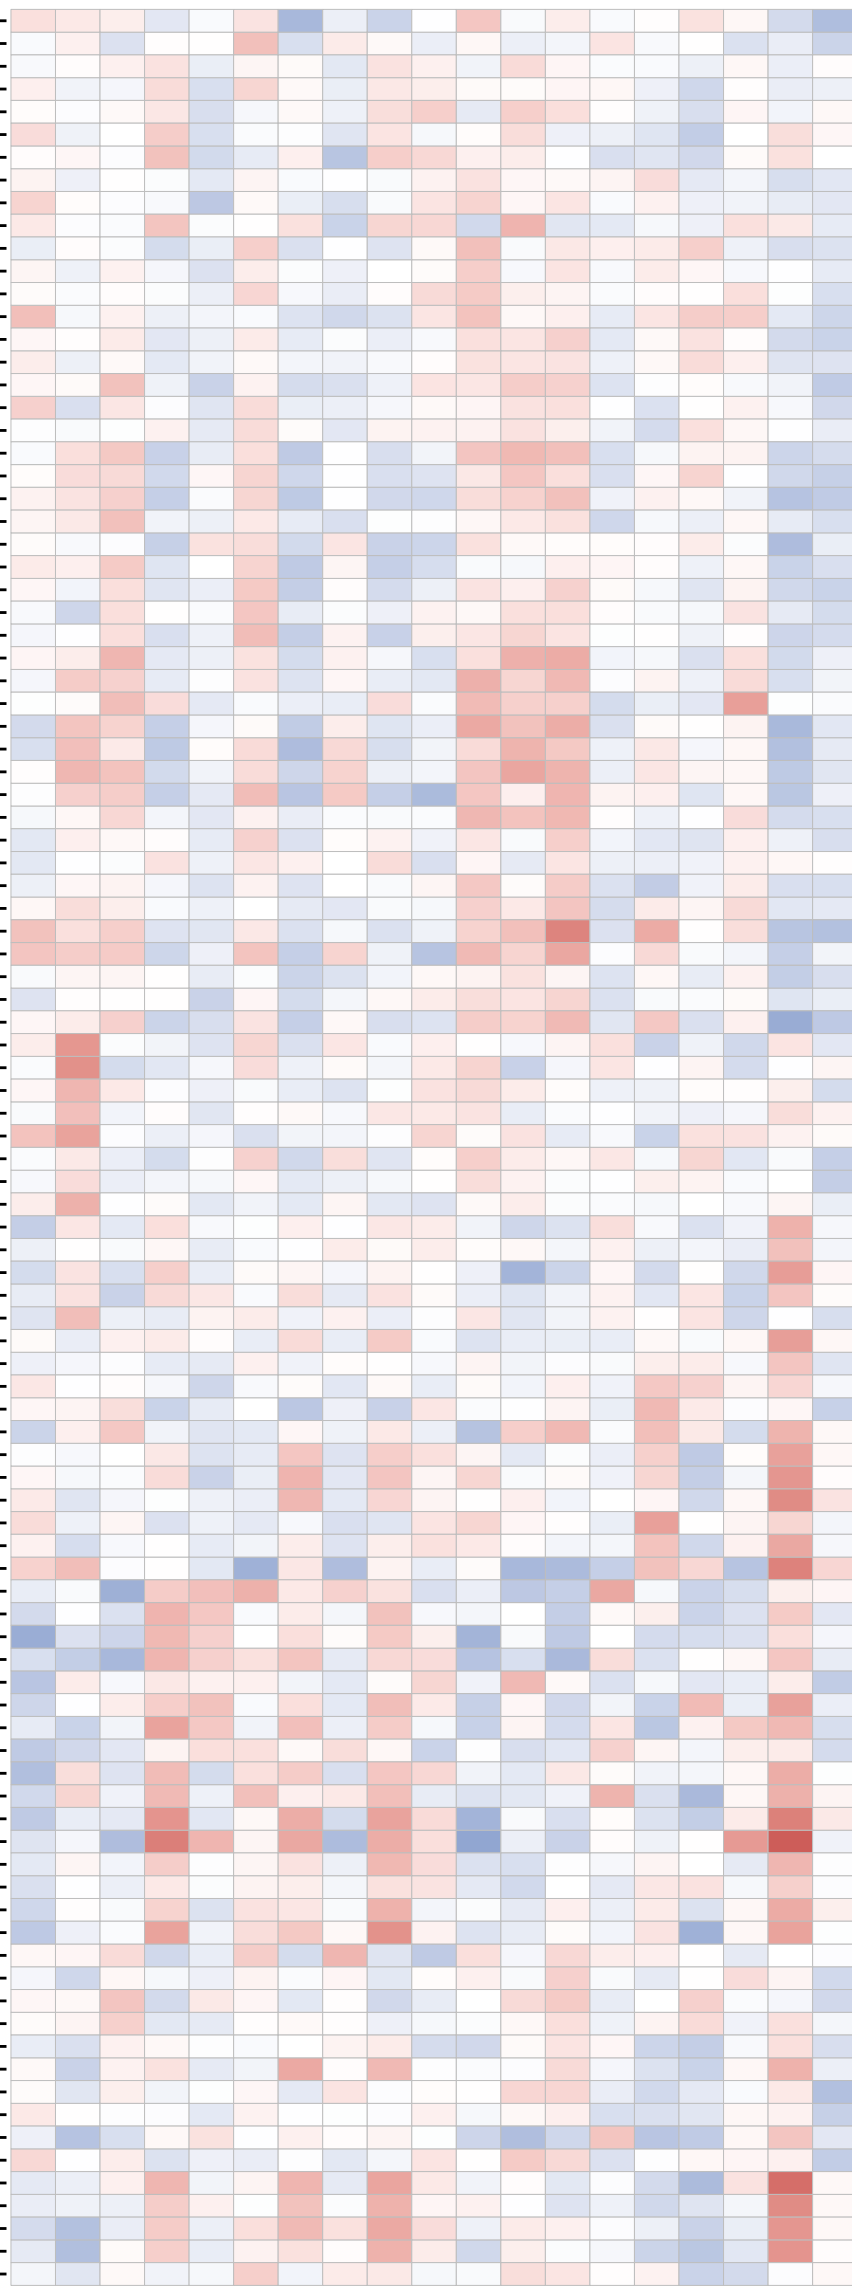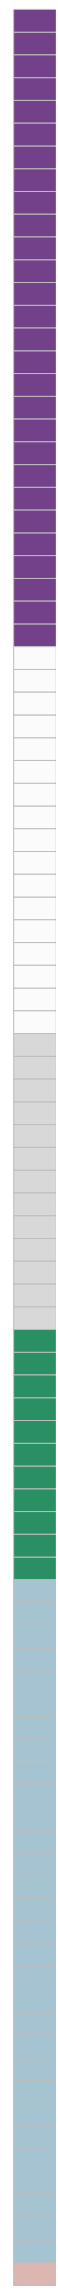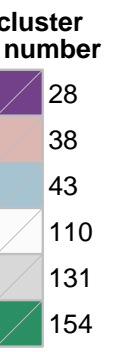

alanine -  
 aspartate -  
 glutamate -  
 phenylalanine -  
 glycine -  
 histidine -  
 isoleucine -  
 lysine -  
 leucine -  
 methionine -  
 asparagine -  
 proline -  
 glutamine -  
 arginine -  
 serine -  
 threonine -  
 valine -  
 tryptophan -  
 tyrosine -  
 cluster -

SDP1 YIL113W  
 FRE2 YKL220C  
 YKL222C  
 PRR1 YKL116C  
 YGL242C  
 YPR097W  
 LRO1 YNR008W  
 YKL136W  
 YLR280C  
 YHK8 YHR048W  
 DIN7 YDR263C  
 SHM1 YBR263W  
 BYE1 YKL005C  
 YFL063W  
 MSK1 YNL073W  
 YKL162C  
 EXG2 YDR261C  
 MGT1 YDL200C  
 CHS3 YBR023C  
 GIC2 YDR309C  
 NNK1 YKL171W  
 FMP52 YER004W  
 YSY6 YBR162W-A  
 YPL247C  
 PSY3 YLR376C  
 UBP11 YKR098C  
 YBR184W  
 YJL067W  
 YHC3 YJL059W  
 COS1 YNL336W  
 TCD1 YHR003C  
 YPR098C  
 NGL2 YMR285C  
 IFA38 YBR159W  
 AMN1 YBR158W  
 SLI15 YBR156C  
 URK1 YNR012W  
 YDL086W  
 MRX6 YNL295W  
 PRM15 YMR278W  
 EGT2 YNL327W  
 YNL146C-A  
 IRC22 YEL001C  
 YCR100C  
 YME2 YMR302C  
 CIT3 YPR001W  
 YMR31 YFR049W  
 PHO4 YFR034C  
 STL1 YDR536W  
 HXK1 YFR053C  
 YOL013W-B  
 HRD3 YLR207W  
 YPR114W  
 YMR085W  
 NAS6 YGR232W  
 SPO71 YDR104C  
 ISR1 YPR106W  
 SNO2 YNL334C  
 NCE102 YPR149W  
 YPL035C  
 YPR148C  
 MF(ALPHA)1 YPL187W  
 MET31 YPL038W  
 RPD3 YNL330C  
 YNL194C  
 PXA1 YPL147W  
 YPR147C  
 YOL019W-A  
 ISM1 YPL040C  
 YPL039W  
 MET12 YPL023C  
 YPR117W  
 ULA1 YPL003W  
 YPL025C  
 MCA1 YOR197W  
 FOB1 YDR110W  
 CTL1 YMR180C  
 VPS70 YJR126C  
 YBR056W  
 AIM41 YOR215C  
 ASF2 YDL197C  
 PNG1 YPL096W  
 SGM1 YJR134C  
 YDR132C  
 TCB1 YOR086C  
 SYM1 YLR251W  
 APD1 YBR151W  
 ATG14 YBR128C  
 ERP3 YDL018C  
 STP4 YDL048C  
 UBS1 YBR165W  
 TYR1 YBR166C  
 NPL4 YBR170C  
 MRX9 YDL027C  
 YDL034W  
 OSH2 YDL019C  
 PBP4 YDL053C  
 IDP1 YDL066W  
 SMY2 YBR172C  
 BSC1 YDL037C

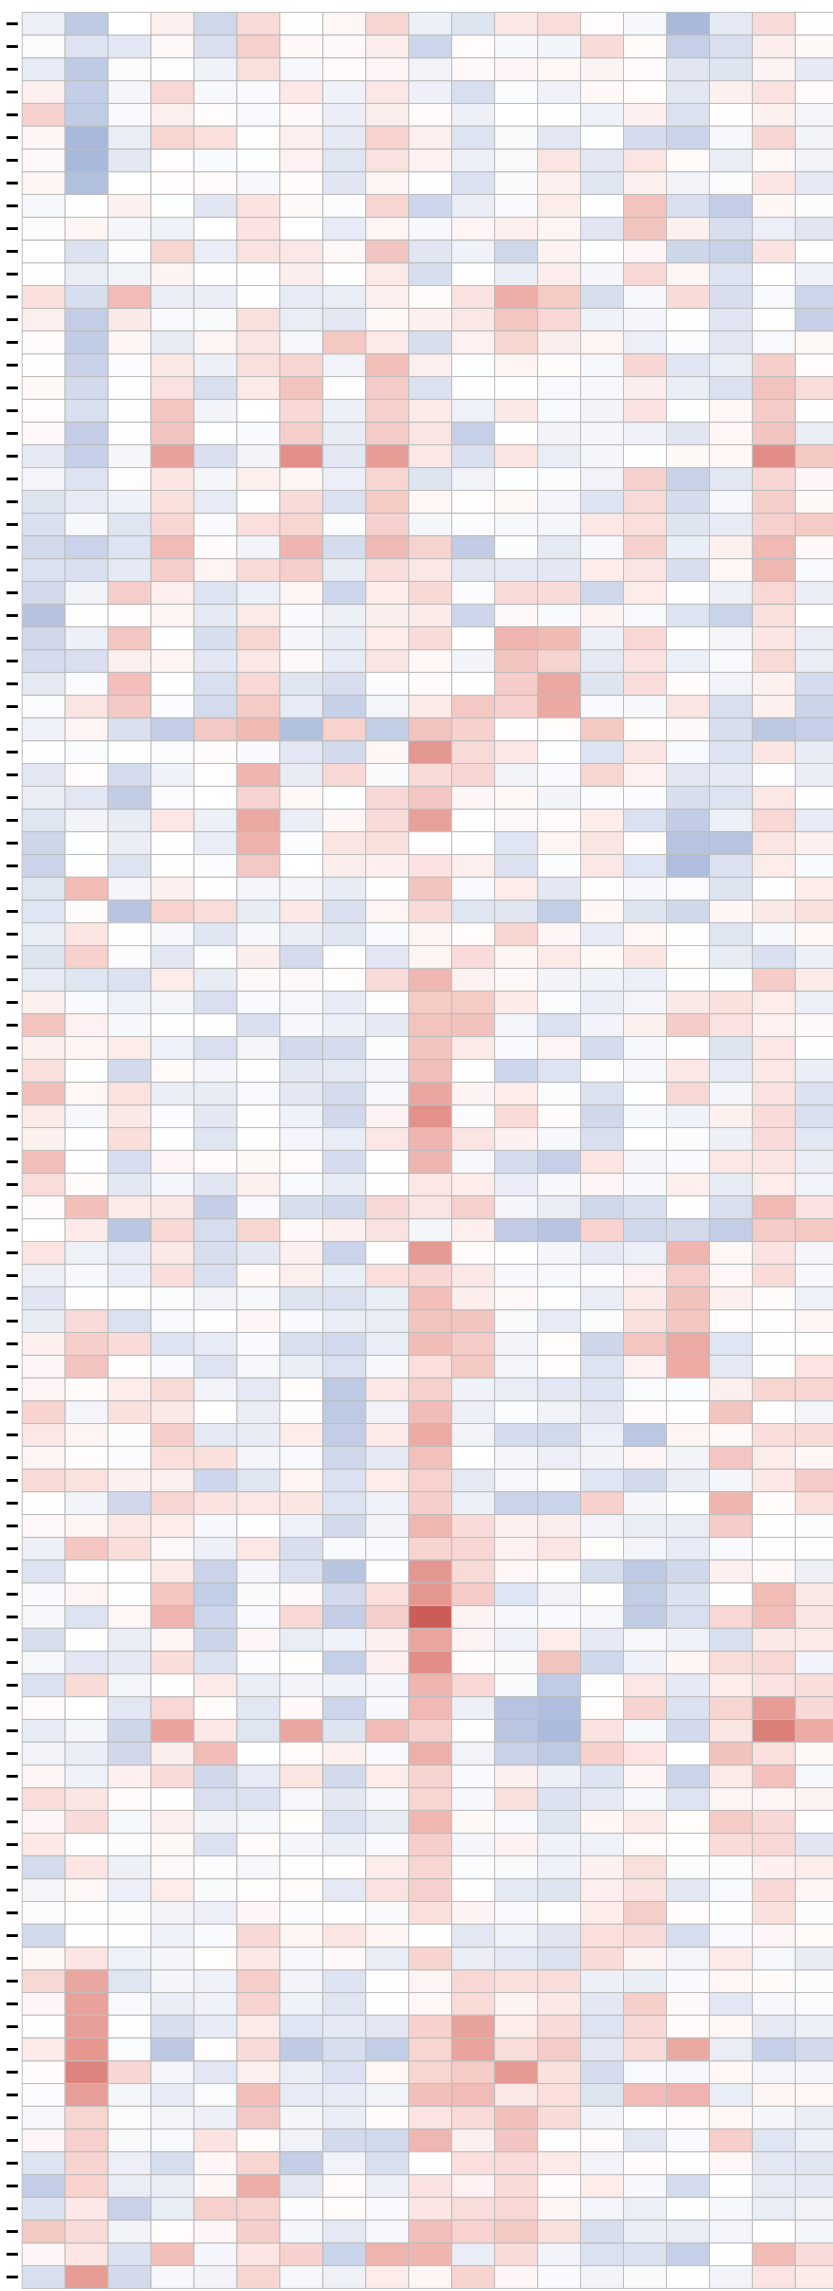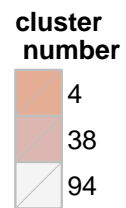

alanine -  
 aspartate -  
 glutamate -  
 phenylalanine -  
 glycine -  
 histidine -  
 isoleucine -  
 lysine -  
 leucine -  
 methionine -  
 asparagine -  
 proline -  
 glutamine -  
 arginine -  
 serine -  
 threonine -  
 valine -  
 tryptophan -  
 tyrosine -  
 cluster -

CSH1 YBR161W  
 PRM7 YDL039C  
 PUS4 YNL292W  
 GPR1 YDL035C  
 EMP47 YFL048C  
 YAT1 YAR035W  
 BIK1 YCL029C  
 CMC4 YMR194C-B  
 MVP1 YMR004W  
 ATC1 YDR184C  
 YDR239C  
 HSM3 YBR272C  
 SSB1 YDL229W  
 YDR220C  
 FCY2 YER056C  
 YDR250C  
 RRT16 YNL105W  
 YML009C-A  
 MLH2 YLR035C  
 MAD2 YJL030W  
 SNC2 YOR327C  
 YJL022W  
 TRE1 YPL176C  
 LSC1 YOR142W  
 YMR221C  
 YMR087W  
 YEL043W  
 SCO2 YBR024W  
 FIG1 YBR040W  
 GPT2 YKR067W  
 PUT3 YKL015W  
 AIP1 YMR092C  
 YKR075C  
 TDA1 YMR291W  
 ANT1 YPR128C  
 YBL081W  
 REC8 YPR007C  
 DLD1 YDL174C  
 RCN1 YKL159C  
 IRC7 YFR055W  
 HES1 YOR237W  
 YDR541C  
 FIT3 YOR383C  
 YJU3 YKL094W  
 YNL143C  
 TVP15 YDR100W  
 RDL2 YOR286W  
 INP52 YNL106C  
 MSB1 YOR188W  
 GOT1 YMR292W  
 YNL122C  
 SPP1 YPL138C  
 COG7 YGL005C  
 PUF4 YGL014W  
 MDJ2 YNL328C  
 SLM3 YDL033C  
 CCP1 YKR066C  
 YAP5 YIR018W  
 EGD1 YPL037C  
 YTP1 YNL237W  
 YIL166C  
 YPR123C  
 LCL3 YGL085W  
 STB3 YDR169C  
 YJL144W  
 ALY2 YJL084C  
 FZF1 YGL254W  
 RMR1 YGL250W  
 PAT1 YCR077C  
 ABP140 YOR239W  
 YIP4 YGL198W  
 DIE2 YGR227W  
 AIM9 YER080W  
 CRT10 YOL063C  
 SWT1 YOR166C  
 FUB1 YCR076C  
 PCL2 YDL127W  
 GLR1 YPL091W  
 BNA6 YFR047C  
 GUP2 YPL189W  
 DAL4 YIR028W  
 RPS9A YPL081W  
 NNT1 YLR285W  
 SEG1 YMR086W  
 YLR225C  
 HAL9 YOL089C  
 RPN14 YGL004C  
 YIR042C  
 YNR071C  
 HAL1 YPR005C  
 YOR170W  
 YNL228W  
 MRT4 YKL009W  
 AYR1 YIL124W  
 TMA22 YJR014W  
 SNQ2 YDR011W  
 RPA49 YNL248C  
 SSO1 YPL232W  
 LSB6 YJL100W  
 MMT2 YPL224C

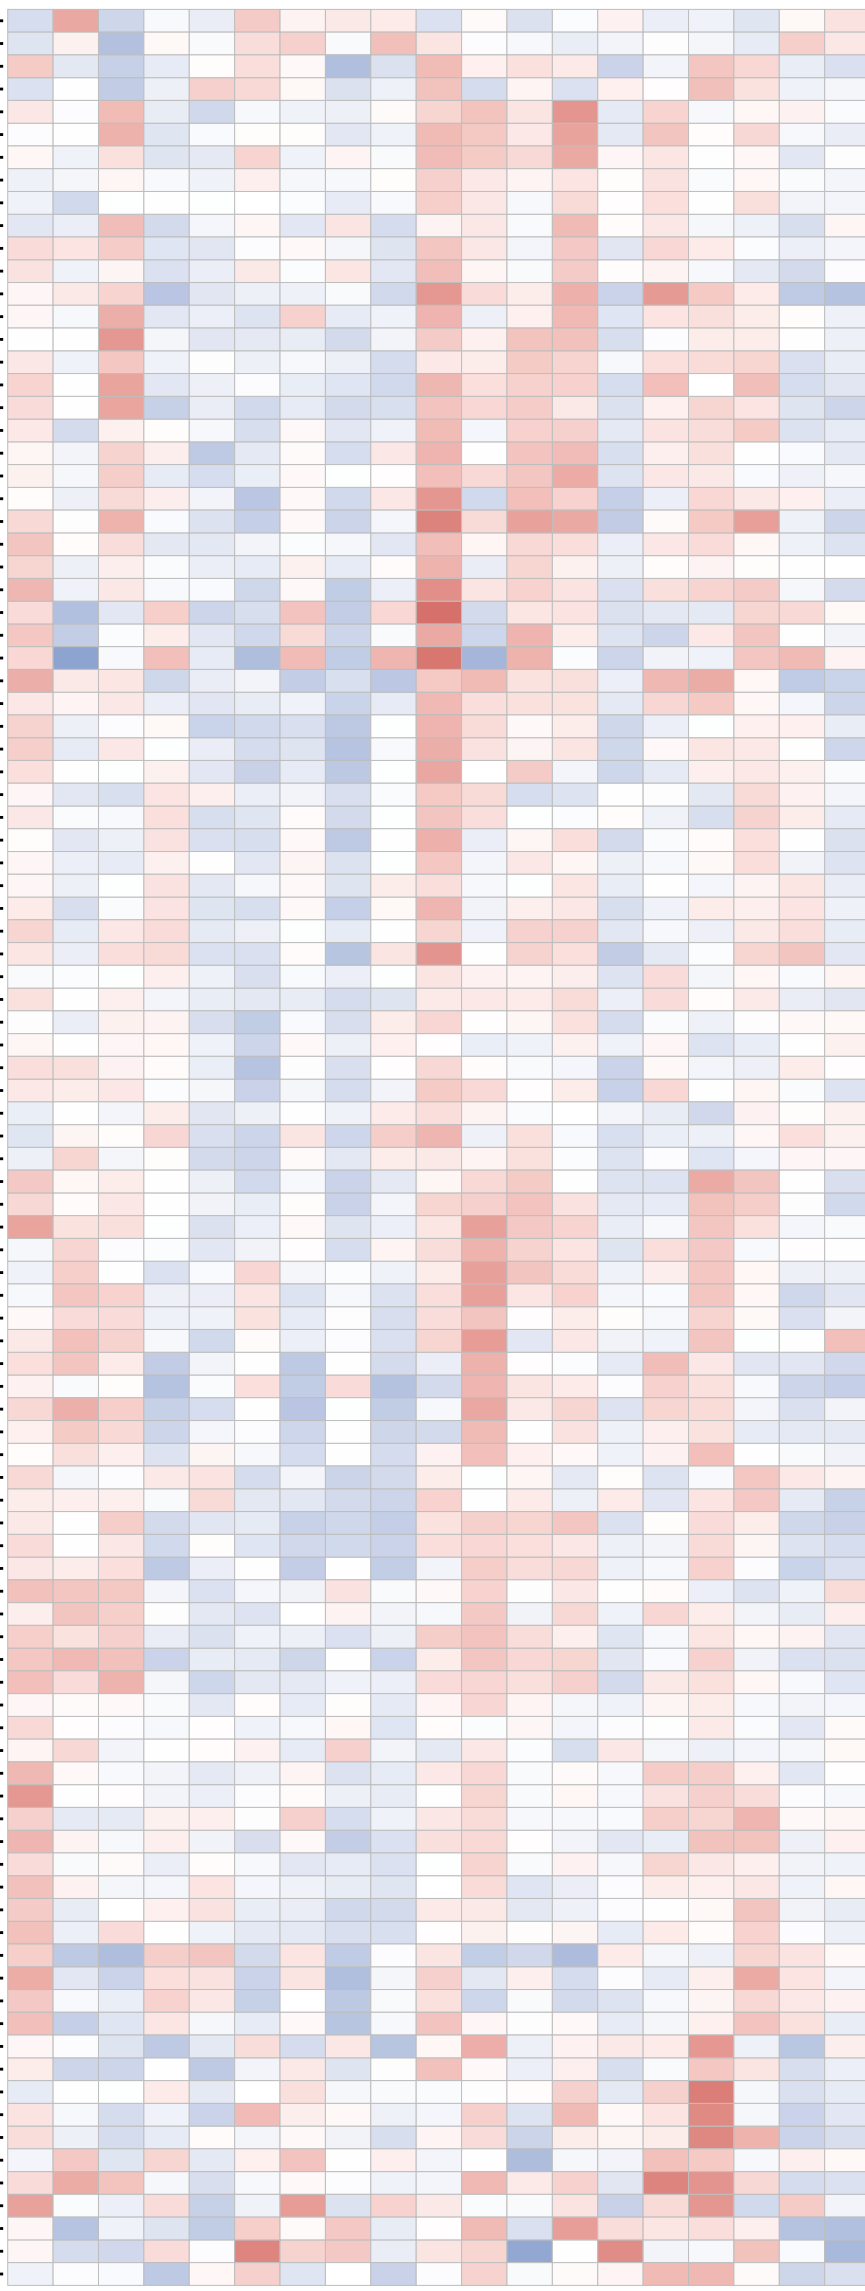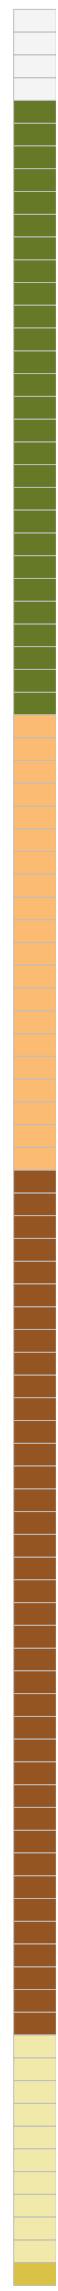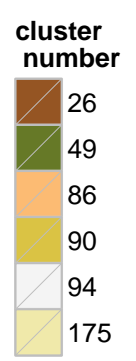

alanine -  
 aspartate -  
 glutamate -  
 phenylalanine -  
 glycine -  
 histidine -  
 isoleucine -  
 lysine -  
 leucine -  
 methionine -  
 asparagine -  
 proline -  
 glutamine -  
 arginine -  
 serine -  
 threonine -  
 valine -  
 tryptophan -  
 tyrosine -  
 cluster -

RIM11 YMR139W  
 YER010C  
 YLH47 YPR125W  
 YNL320W  
 EDC1 YGL222C  
 TAZ1 YPR140W  
 CUL3 YGR003W  
 IMD3 YLR432W  
 YRF1-6 YNL339C  
 ENB1 YOL158C  
 CUE1 YMR264W  
 MSB3 YNL293W  
 RPL2B YIL018W  
 DIG1 YPL049C  
 YLR118C  
 SVL3 YPL032C  
 CWC27 YPL064C  
 OAZ1 YPL052W  
 SGT2 YOR007C  
 ESC1 YMR219W  
 PAC11 YDR488C  
 HUA2 YOR284W  
 YMR210W  
 YFR006W  
 RCR2 YDR003W  
 CTO1 YCR015C  
 GYP8 YFL027C  
 NRK1 YNL129W  
 YMR172C-A  
 YBL065W  
 REC114 YMR133W  
 MAP2 YBL091C  
 PAU4 YLR461W  
 OAF3 YKR064W  
 YNR064C  
 ALD3 YMR169C  
 HOP1 YIL072W  
 VMA4 YOR332W  
 YMR182W-A  
 EST2 YLR318W  
 YDL211C  
 YLR444C  
 SPS22 YCL048W  
 RAD17 YOR368W  
 LYP1 YNL268W  
 IRC11 YOR013W  
 HSP30 YCR021C  
 YJL007C  
 YCR051W  
 YFR054C  
 YCR099C  
 IRC4 YDR540C  
 AIR2 YDL175C  
 YGR237C  
 YHB1 YGR234W  
 IRC24 YIR036C  
 YIR020W-A  
 MAL13 YGR288W  
 IMA1 YGR287C  
 FLO11 YIR019C  
 NAT4 YMR069W  
 YMR114C  
 YML119W  
 YBR064W  
 YBR051W  
 YML090W  
 YDL176W  
 SMK1 YPR054W  
 YPL014W  
 THO2 YNL139C  
 YNL108C  
 APP1 YNL094W  
 ECM12 YHR021W-A  
 YLR374C  
 HXK2 YGL253W  
 YMR074C  
 YJL120W  
 IMO32 YGR031W  
 AHC2 YCR082W  
 YPR126C  
 MRS2 YOR334W  
 YMR119W-A  
 GDH2 YDL215C  
 ASI2 YNL159C  
 CUE4 YML101C  
 PAU17 YLL025W  
 RNQ1 YCL028W  
 STE2 YFL026W  
 SHH3 YMR118C  
 YCR085W  
 ECM3 YOR092W  
 ROG3 YFR022W  
 SCD6 YPR129W  
 VMA13 YPR036W  
 YCK1 YHR135C  
 YOR022C  
 SMF3 YLR034C  
 SYT1 YPR095C  
 TIM21 YGR033C  
 AQR1 YNL065W

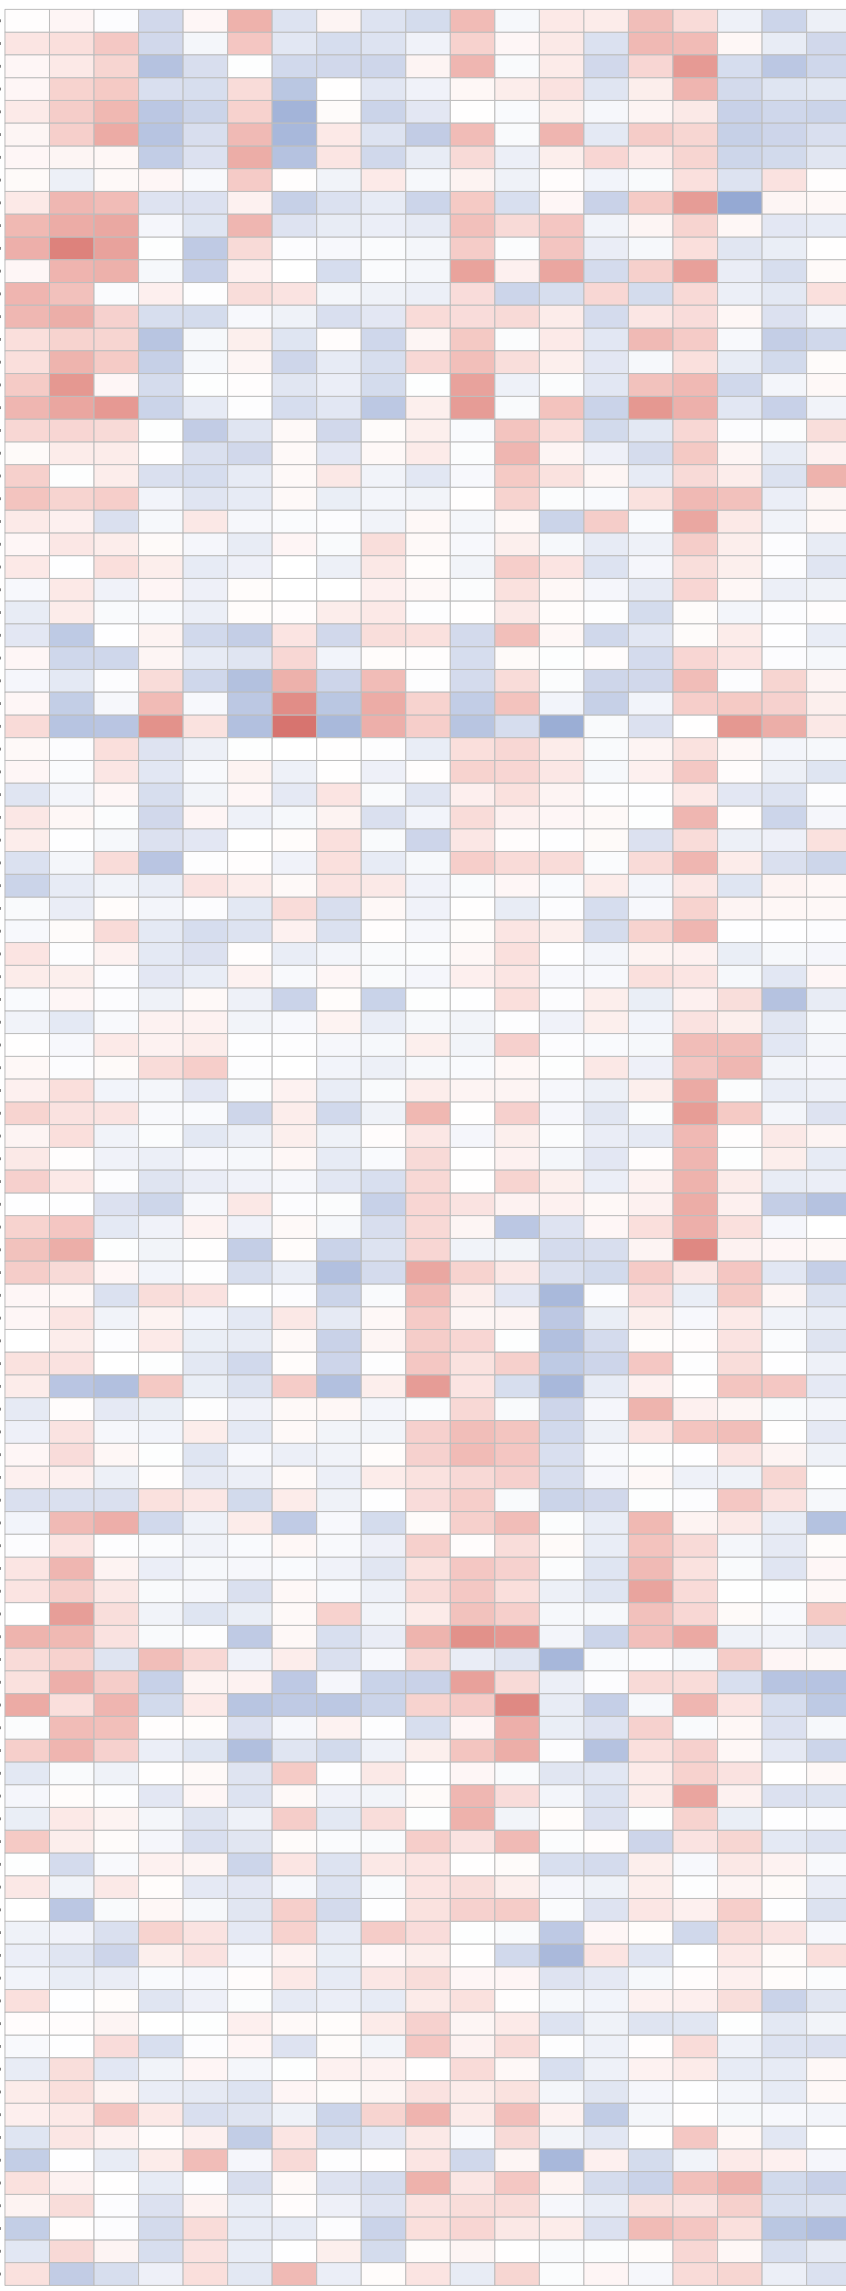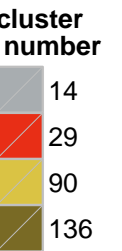

alanine -  
 aspartate -  
 glutamate -  
 phenylalanine -  
 glycine -  
 histidine -  
 isoleucine -  
 lysine -  
 leucine -  
 methionine -  
 asparagine -  
 proline -  
 glutamine -  
 arginine -  
 serine -  
 threonine -  
 valine -  
 tryptophan -  
 tyrosine -  
 cluster -

YLR269C  
 SPG4 YMR107W  
 PMT1 YDL095W  
 YCL023C  
 ELG1 YOR144C  
 MTC3 YGL226W  
 ZRT2 YLR130C  
 LSB5 YCL034W  
 YAK1 YJL141C  
 AHA1 YDR214W  
 YDR209C  
 SCW11 YGL028C  
 YCL049C  
 AIR1 YIL079C  
 YGL024W  
 YBL070C  
 DTD1 YDL219W  
 MNS1 YJR131W  
 ATE1 YGL017W  
 YKL023W  
 BRP1 YGL007W  
 DAL5 YJR152W  
 YOL019W  
 GND2 YGR256W  
 NHA1 YLR138W  
 VPS13 YLL040C  
 PUS7 YOR243C  
 TMA46 YOR091W  
 GRX3 YDR098C  
 EK11 YDR147W  
 RPS22A YJL190C  
 YIL089W  
 EAF6 YJR082C  
 YDR010C  
 YBL039W-B  
 YNL035C  
 BUD8 YLR353W  
 YER158C  
 YGR266W  
 YOR225W  
 KCC4 YCL024W  
 ATG33 YLR356W  
 SUE1 YPR151C  
 YDL199C  
 VID27 YNL212W  
 YGL041C  
 YGL039W  
 PPM2 YOL141W  
 LCB3 YJL134W  
 YBR224W  
 PLB1 YMR008C  
 YSC84 YHR016C  
 ERG6 YML008C  
 YKR041W  
 YFL054C  
 TVP23 YDR084C  
 ACK1 YDL203C  
 CPS1 YJL172W  
 YGR259C  
 MNN1 YER001W  
 TAD1 YGL243W  
 ATG9 YDL149W  
 LOT6 YLR011W  
 PCT1 YGR202C  
 YOR296W  
 NIF3 YGL221C  
 AIM33 YML087C  
 LDS1 YAL018C  
 PAU8 YAL068C  
 PEA2 YER149C  
 ITT1 YML068W  
 YGR053C  
 YNL144C  
 SBH2 YER019C-A  
 MRX4 YPL168W  
 YNR066C  
 JSN1 YJR091C  
 TDA2 YER071C  
 PPT1 YGR123C  
 YAL042C-A  
 JIP3 YLR331C  
 YJL132W  
 SMY1 YKL079W  
 KSS1 YGR040W  
 EDS1 YBR033W  
 MNL2 YLR057W  
 YSR3 YKR053C  
 PEX21 YGR239C  
 ECM1 YAL059W  
 ATS1 YAL020C  
 TSL1 YML100W  
 DNF2 YDR093W  
 YIL141W  
 PEX30 YLR324W  
 VID24 YBR105C  
 YJL193W  
 MRI1 YPR118W  
 STP2 YHR006W  
 YJR146W  
 PER33 YLR064W

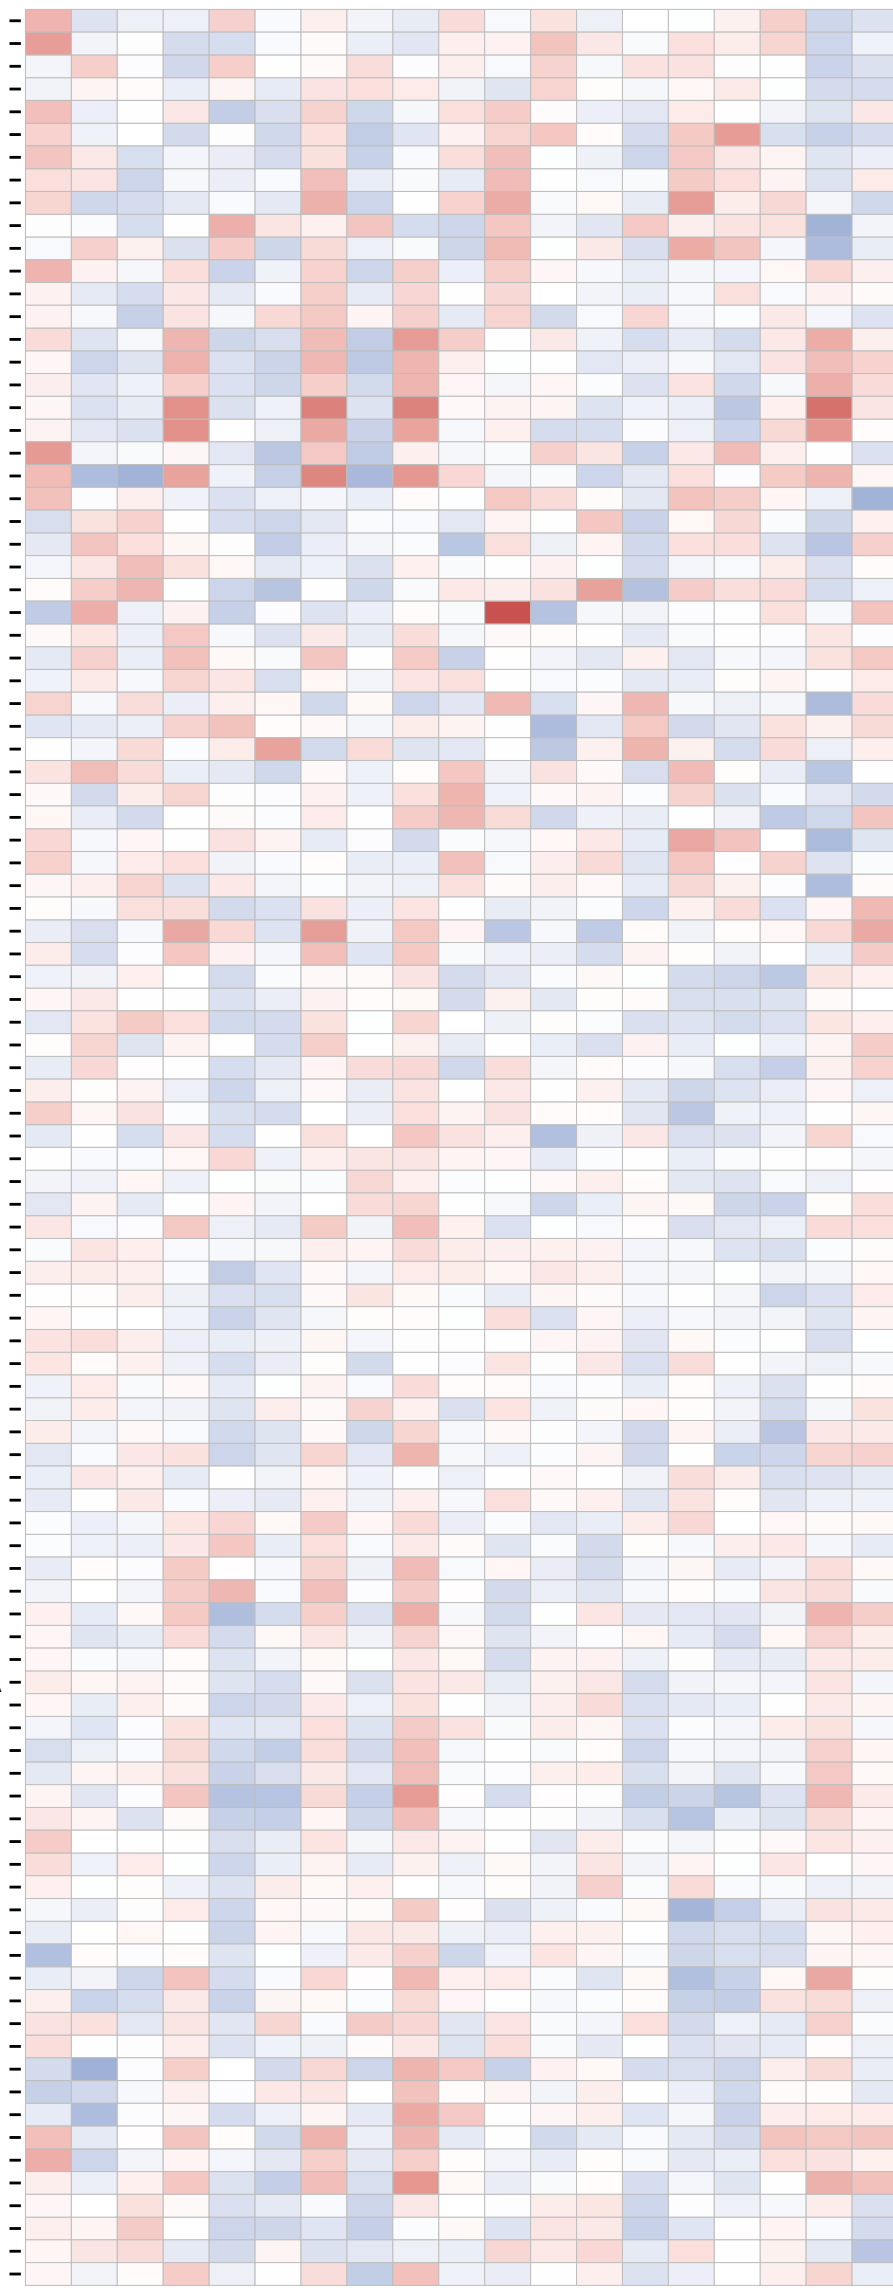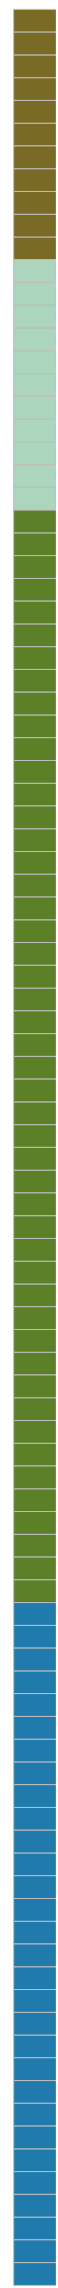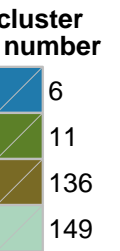

alanine -  
 aspartate -  
 glutamate -  
 phenylalanine -  
 glycine -  
 histidine -  
 isoleucine -  
 lysine -  
 leucine -  
 methionine -  
 asparagine -  
 proline -  
 glutamine -  
 arginine -  
 serine -  
 threonine -  
 valine -  
 tryptophan -  
 tyrosine -  
 cluster -

RPL8B YLL045C  
 PCK1 YKR097W  
 KIP1 YBL063W  
 YJL055W  
 MDM31 YHR194W  
 YOL160W  
 MPP6 YNR024W  
 YHR127W  
 RAD2 YGR258C  
 YLL053C  
 THI4 YGR144W  
 YBR013C  
 NUP100 YKL068W  
 ENT5 YDR153C  
 JJJ3 YJR097W  
 YMR320W  
 YGL015C  
 RCK2 YLR248W  
 PIN4 YBL051C  
 EDC2 YER035W  
 TIR1 YER011W  
 IRC18 YJL037W  
 GCY1 YOR120W  
 SBA1 YKL117W  
 CEX1 YOR112W  
 BEM3 YPL115C  
 VOA1 YGR106C  
 MBR1 YKL093W  
 YCR102W-A  
 DAL7 YIR031C  
 TCM62 YBR044C  
 MTQ1 YNL063W  
 INA22 YIR024C  
 YFR057W  
 YFR056C  
 ARR2 YPR200C  
 BCH1 YMR237W  
 FUS2 YMR232W  
 MGA1 YGR249W  
 UBP5 YER144C  
 RDS1 YCR106W  
 EFM1 YHL039W  
 SPO73 YER046W  
 AAT1 YKL106W  
 NEM1 YHR004C  
 RTN2 YDL204W  
 BAP2 YBR068C  
 YBR032W  
 RAD14 YMR201C  
 MRPS17 YMR188C  
 BSD2 YBR290W  
 SDH8 YBR269C  
 KAR9 YPL269W  
 MDM20 YOL076W  
 LEA1 YPL213W  
 THP1 YOL072W  
 YGL176C  
 MAG1 YER142C  
 APM4 YOL062C  
 SIP4 YJL089W  
 OPI10 YOL032W  
 RBK1 YCR036W  
 INP54 YOL065C  
 YKL091C  
 ESC8 YOL017W  
 RPL22B YFL034C-A  
 ACS1 YAL054C  
 NRM1 YNR009W  
 ICL1 YER065C  
 YAL004W  
 TIS11 YLR136C  
 SSE2 YBR169C  
 DSC2 YOL073C  
 DAK2 YFL053W  
 RPL15B YMR121C  
 YML122C  
 YBR300C  
 YER188W  
 STF1 YDL130W-A  
 YPR015C  
 YMR103C  
 MIC26 YGR235C  
 YCR090C  
 YMR130W  
 DLT1 YMR126C  
 YGR242W  
 YAP1802 YGR241C  
 RAX2 YLR084C  
 YLR122C  
 TES1 YJR019C  
 YPS1 YLR120C  
 HAP3 YBL021C  
 YCL001W-A  
 TPO2 YGR138C  
 ISC1 YER019W  
 EMC4 YGL231C  
 TMT1 YER175C  
 YPR027C  
 JLP2 YMR132C  
 YGR127W

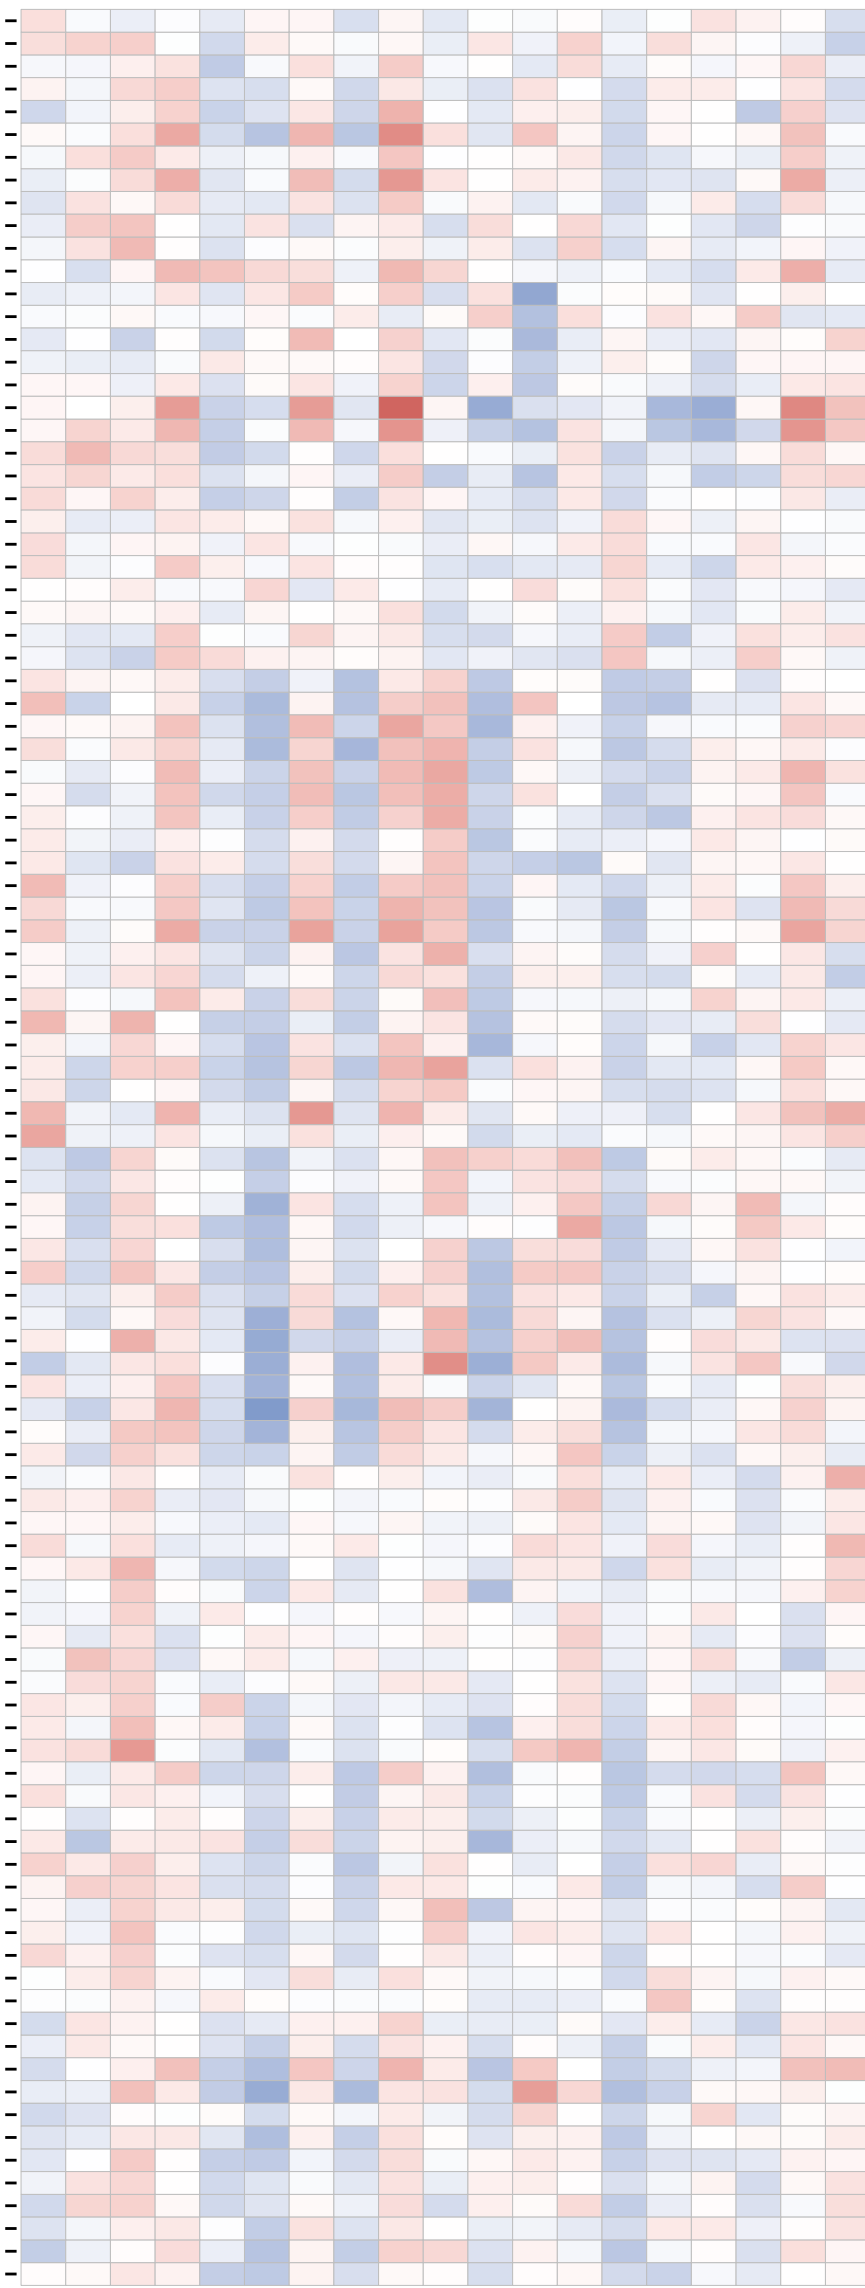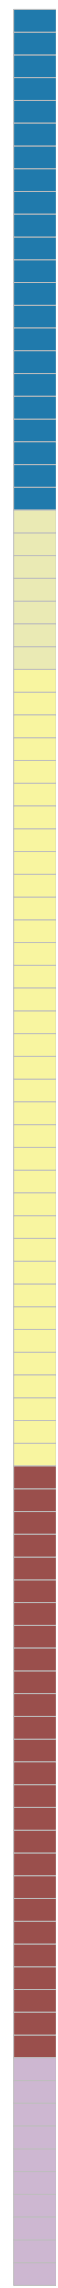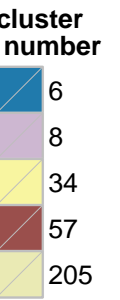

alanine -  
 aspartate -  
 glutamate -  
 phenylalanine -  
 glycine -  
 histidine -  
 isoleucine -  
 lysine -  
 leucine -  
 methionine -  
 asparagine -  
 proline -  
 glutamine -  
 arginine -  
 serine -  
 threonine -  
 valine -  
 tryptophan -  
 tyrosine -  
 cluster -



NSI1 YDR026C  
 ATP20 YPR020W  
 ICL2 YPR006C  
 YMR316C-A  
 ZRG17 YNR039C  
 RCR1 YBR005W  
 YHR049C-A  
 SSH1 YBR283C  
 YDR537C  
 LDB19 YOR322C  
 KAP122 YGL016W  
 SPO75 YLL005C  
 DSC3 YOR223W  
 WHI4 YDL224C  
 SNX3 YOR357C  
 KXD1 YGL079W  
 AIM14 YGL160W  
 RRT6 YGL146C  
 GAC1 YOR178C  
 YFL015C  
 RKM3 YBR030W  
 PPG1 YNR032W  
 HBT1 YDL223C  
 YHR078W  
 ESC2 YDR363W  
 BUD13 YGL174W  
 ATG3 YNR007C  
 YBP2 YGL060W  
 MRPL50 YNR022C  
 YVH1 YIR026C  
 YNL028W  
 YNL024C  
 YNL043C  
 ARK1 YNL020C  
 MKT1 YNL085W  
 MDM1 YML104C  
 DDI1 YER143W  
 RTN1 YDR233C  
 YNL115C  
 LAP2 YNL045W  
 BAP3 YDR046C  
 FRE3 YOR381W  
 EPT1 YHR123W  
 YOR238W  
 VAC17 YCL063W  
 NMA111 YNL123W  
 JIP4 YDR475C  
 MRX1 YER077C  
 PAU23 YLR037C  
 YKR005C  
 YNR040W  
 SHE2 YKL130C  
 OMA1 YKR087C  
 CST26 YBR042C  
 SPO21 YOL091W  
 YNL146W  
 YPL199C  
 YGR137W  
 NAB6 YML117W  
 TPA1 YER049W  
 YER066C-A  
 HSP26 YBR072W  
 FRT1 YOR324C  
 PIC2 YER053C  
 MRPL31 YKL138C  
 UBP12 YJL197W  
 YFL040W  
 RDR1 YOR380W  
 CHZ1 YER030W  
 PXL1 YKR090W  
 YGR130C  
 EFM3 YJR129C  
 GUD1 YDL238C  
 YNR062C  
 YLR456W  
 SPS4 YOR313C  
 SNF3 YDL194W  
 YNL092W  
 YOL162W  
 SUR7 YML052W  
 ADE16 YLR028C  
 TDA11 YHR159W  
 FIR1 YER032W  
 GAL4 YPL248C  
 BLI1 YKL061W  
 HCS1 YKL017C  
 YJR128W  
 THO1 YER063W  
 LSB1 YGR136W  
 MRP8 YKL142W  
 MFA2 YNL145W  
 YCR049C  
 GTT1 YIR038C  
 TOD6 YBL054W  
 YNL089C  
 YDL206W  
 PML1 YLR016C  
 YPL185W  
 YGR151C  
 AIM26 YKL037W

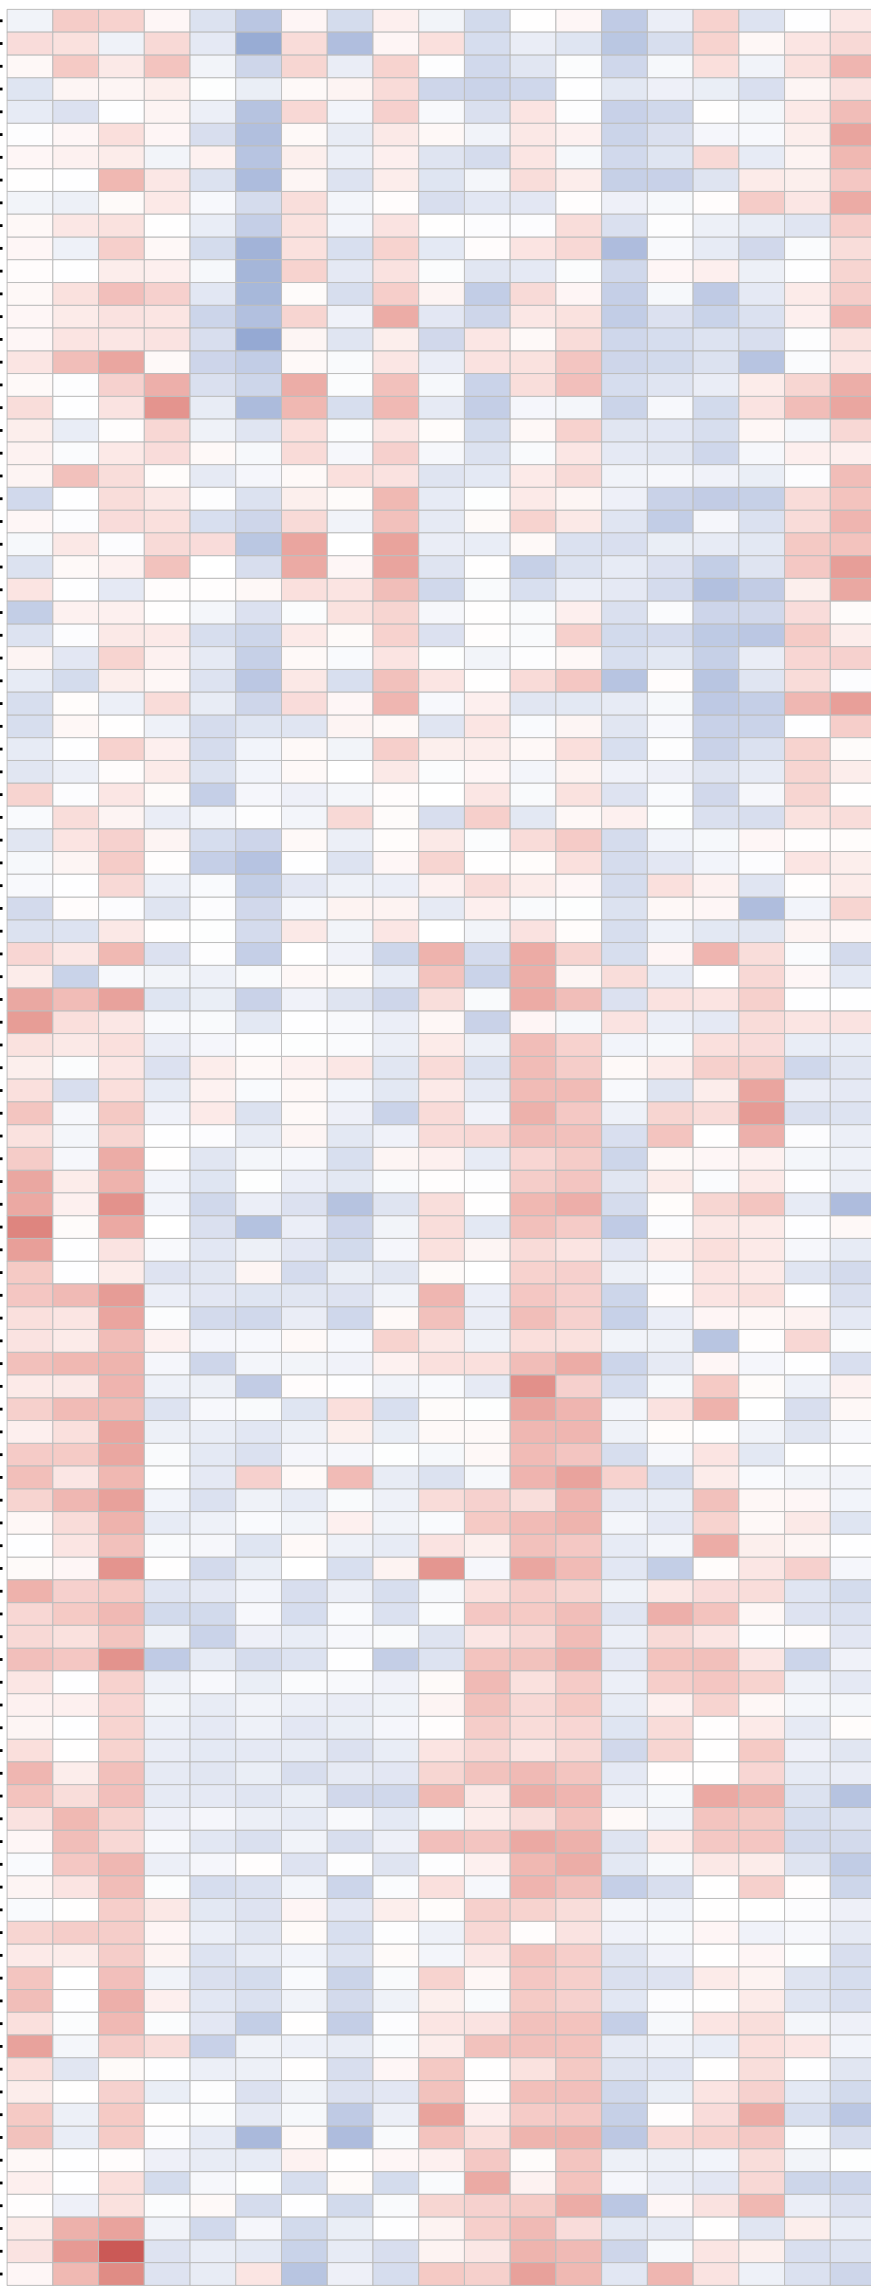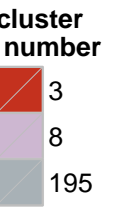

alanine -  
 aspartate -  
 glutamate -  
 phenylalanine -  
 glycine -  
 histidine -  
 isoleucine -  
 lysine -  
 leucine -  
 methionine -  
 asparagine -  
 proline -  
 glutamine -  
 arginine -  
 serine -  
 threonine -  
 valine -  
 tryptophan -  
 tyrosine -  
 cluster -

YPT31 YER031C  
 IRA2 YOL081W  
 EMC3 YKL207W  
 YGR228W  
 UBP1 YDL122W  
 JHD1 YER051W  
 HVG1 YER039C  
 ARR3 YPR201W  
 CRZ1 YNL027W  
 YER038W-A  
 GPP2 YER062C  
 YEL067C  
 POX1 YGL205W  
 ALK2 YBL009W  
 YJR015W  
 GNP1 YDR508C  
 CSI2 YOL007C  
 YJL045W  
 TOS2 YGR221C  
 SPR28 YDR218C  
 QDR3 YBR043C  
 YJL049W  
 YEN1 YER041W  
 GYP6 YJL044C  
 PTP3 YER075C  
 GIP1 YBR045C  
 SLY41 YOR307C  
 SIP2 YGL208W  
 TDH1 YJL052W  
 YJR084W  
 MTO1 YGL236C  
 YGR126W  
 RBG2 YGR173W  
 GID7 YCL039W  
 FUN19 YAL034C  
 YAR035C-A  
 BUD22 YMR014W  
 YDR018C  
 ISC10 YER180C  
 GSP2 YOR185C  
 APL1 YJR005W  
 MEI4 YER044C-A  
 MXR1 YER042W  
 GIP2 YER054C  
 SPE3 YPR069C  
 ATG19 YOL082W  
 CWC15 YDR163W  
 MET22 YOL064C  
 ERI1 YPL096C-A  
 YJR038C  
 GCS1 YDL226C  
 ATG15 YCR068W  
 SFK1 YKL051W  
 YJL206C  
 PAC2 YER007W  
 SIN4 YNL236W  
 ATG10 YLL042C  
 YJR020W  
 SPC1 YJR010C-A  
 ATG2 YNL242W  
 RTS3 YGR161C  
 TAT1 YBR069C  
 ESBP6 YNL125C  
 VPS62 YGR141W  
 CKI1 YLR133W  
 YMR253C  
 APC9 YLR102C  
 YNL193W  
 RGA2 YDR379W  
 YJR098C  
 YPT32 YGL210W  
 YKL030W  
 MIG2 YGL209W  
 RMD6 YEL072W  
 SAN1 YDR143C  
 IME1 YJR094C  
 SFC1 YJR095W  
 YND1 YER005W  
 YKL050C  
 FMP40 YPL222W  
 YJL218W  
 ARL3 YPL051W  
 MRX7 YNL211C  
 SLZ1 YNL196C  
 DUG3 YNL191W  
 AIM24 YJR080C  
 BSP1 YPR171W  
 AVT5 YBL089W  
 MOH1 YBL049W  
 CHS6 YJL099W  
 YGL006W-A  
 TDA4 YJR116W  
 GSC2 YGR032W  
 SHE1 YBL031W  
 COA6 YMR244C-A  
 AHP1 YLR109W  
 NUP170 YBL079W  
 SSA3 YBL075C  
 YPR089W  
 SKT5 YBL061C

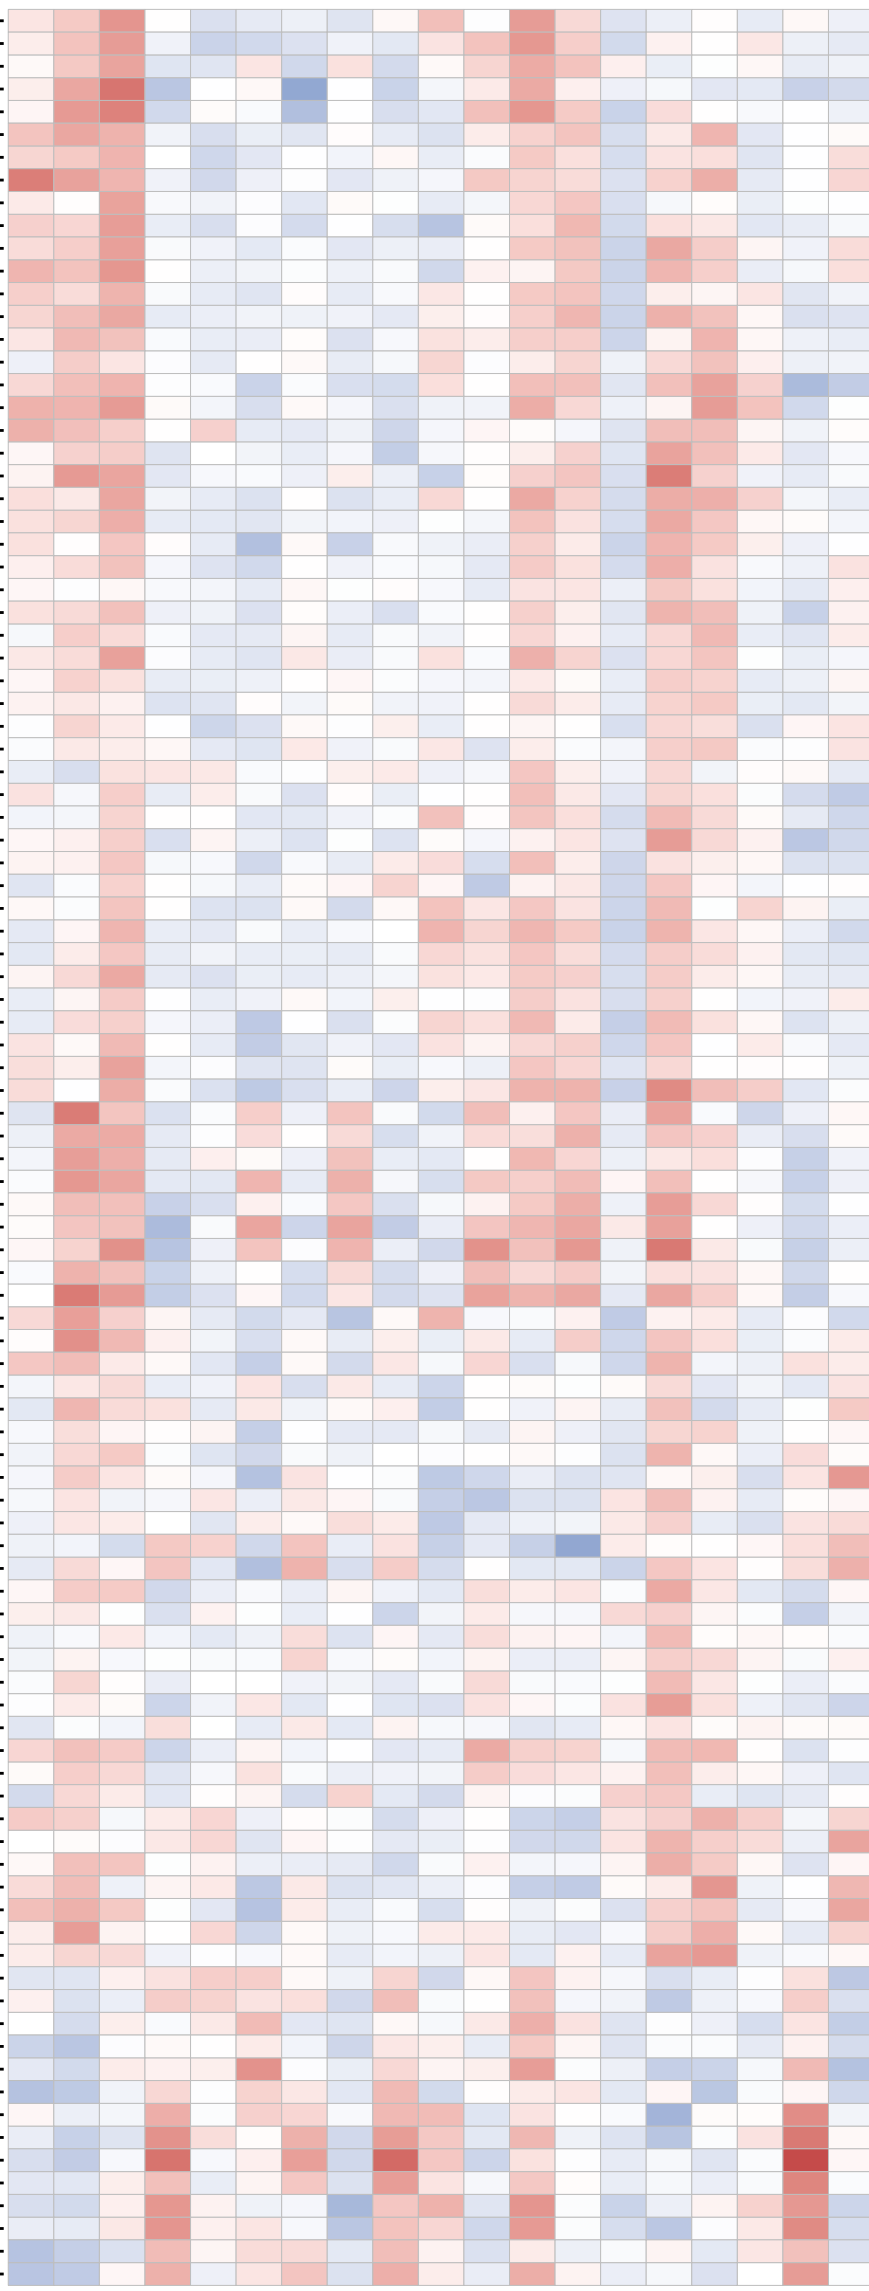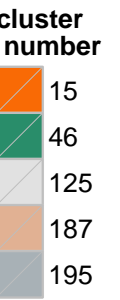

alanine -  
 aspartate -  
 glutamate -  
 phenylalanine -  
 glycine -  
 histidine -  
 isoleucine -  
 lysine -  
 leucine -  
 methionine -  
 asparagine -  
 proline -  
 glutamine -  
 arginine -  
 serine -  
 threonine -  
 valine -  
 tryptophan -  
 tyrosine -  
 cluster -

YBR296C-A  
 YBL008W-A  
 YAL037C-A  
 YHR007C-A  
 YHL015W-A  
 GLY1 YEL046C  
 YDL159W-A  
 YBL029C-A  
 YAL067W-A  
 YBL100W-C  
 YAL016C-B  
 YOR105W  
 YDR169C-A  
 ROM1 YGR070W  
 NFT1 YKR103W  
 RTC5 YOR118W  
 BUD9 YGR041W  
 YGR146C-A  
 YDR246W-A  
 SLO1 YER180C-A  
 YGR174W-A  
 YJL152W  
 ARC18 YLR370C  
 SYC1 YOR179C  
 MEP1 YGR121C  
 LSO2 YGR169C-A  
 YDL085C-A  
 YHR022C-A  
 EMP46 YLR080W  
 YIL134C-A  
 AKR2 YOR034C  
 YOR024W  
 AHC1 YOR023C  
 GIS2 YNL255C  
 YNL200C  
 SFT2 YBL102W  
 HMS1 YOR032C  
 YDR415C  
 IRC6 YFR043C  
 ADH7 YCR105W  
 PHO81 YGR233C  
 ARR1 YPR199C  
 YER039C-A  
 SGE1 YPR198W  
 RAD28 YDR030C  
 IZH1 YDR492W  
 YLR179C  
 ATF2 YGR177C  
 RSN1 YMR266W  
 YMR265C  
 ECM23 YPL021W  
 YPR195C  
 SDH1 YKL148C  
 BUL1 YMR275C  
 TRI1 YMR233W  
 YEL028W  
 RAD30 YDR419W  
 SCP1 YOR367W  
 CSC1 YLR241W  
 ALD5 YER073W  
 ATG22 YCL038C  
 FRE1 YLR214W  
 FPR3 YML074C  
 YGR067C  
 MDH3 YDL078C  
 TIP1 YBR067C  
 LDB18 YLL049W  
 YJL215C  
 BZZ1 YHR114W  
 YEL010W  
 GCN4 YEL009C  
 HPT1 YDR399W  
 RIM21 YNL294C  
 BNI4 YNL233W  
 SAS3 YBL052C  
 YER137C  
 DPL1 YDR294C  
 COX16 YJL003W  
 ARI1 YGL157W  
 MSP1 YGR028W  
 RCK1 YGL158W  
 YER097W  
 HMG1 YML075C  
 YNR029C  
 YMR254C  
 APL3 YBL037W  
 YPR022C  
 YGL230C  
 TRM13 YOL125W  
 MNT2 YGL257C  
 PNS1 YOR161C  
 OXP1 YKL215C  
 BIO4 YNR057C  
 YJL127C-B  
 RPS23A YGR118W  
 YDR278C  
 NAM7 YMR080C  
 UPF3 YGR072W  
 YCH1 YGR203W  
 YPL109C

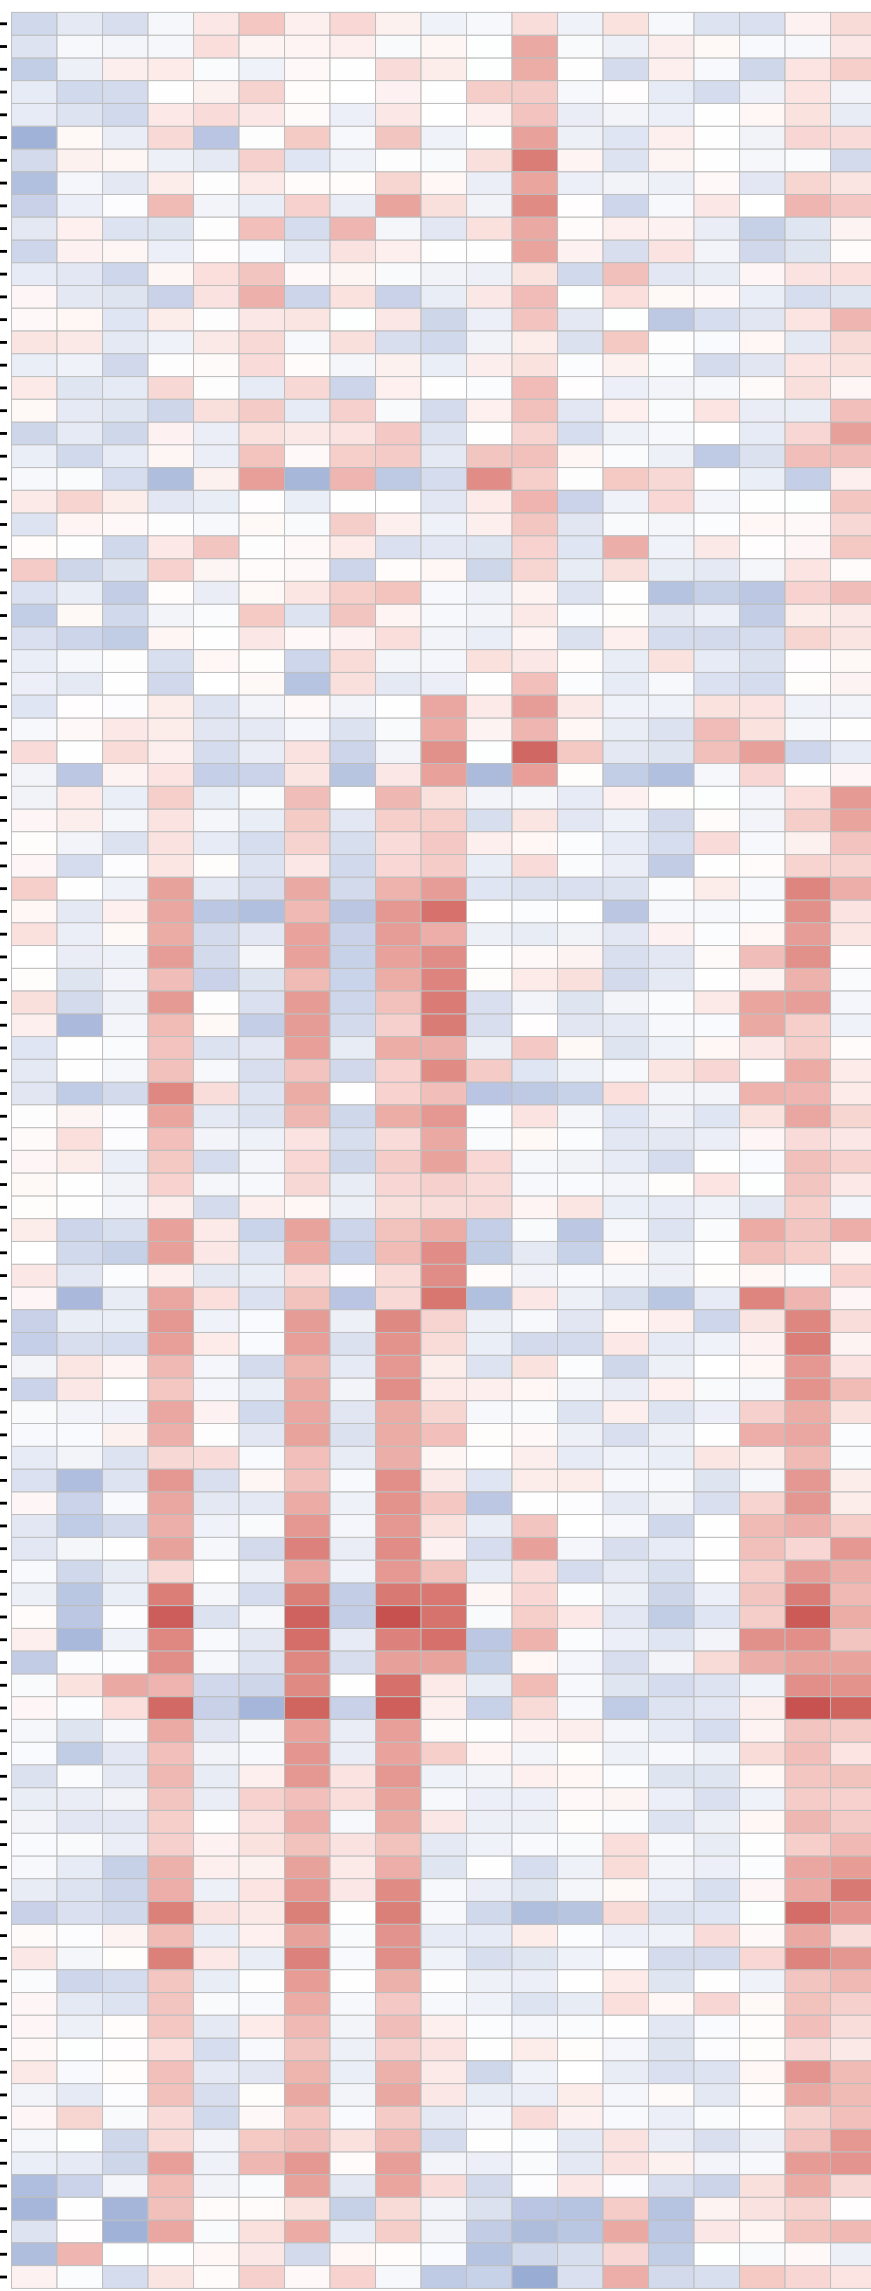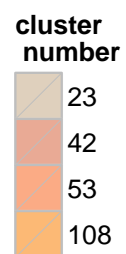

alanine -  
 aspartate -  
 glutamate -  
 phenylalanine -  
 glycine -  
 histidine -  
 isoleucine -  
 lysine -  
 leucine -  
 methionine -  
 asparagine -  
 proline -  
 glutamine -  
 arginine -  
 serine -  
 threonine -  
 valine -  
 tryptophan -  
 tyrosine -  
 cluster -

PRM1 YNL279W  
 ZEO1 YOL109W  
 RTT101 YJL047C  
 TRM732 YMR259C  
 SHG1 YBR258C  
 YOL098C  
 YGR050C  
 CPA2 YJR109C  
 CLN1 YMR199W  
 TPP1 YMR156C  
 YNR073C  
 SIP5 YMR140W  
 MSA2 YKR077W  
 AGC1 YPR021C  
 SVF1 YDR346C  
 BFA1 YJR053W  
 DSS4 YPR017C  
 CBP3 YPL215W  
 YML108W  
 RRT13 YER066W  
 APE4 YHR113W  
 KSP1 YHR082C  
 MSG5 YNL053W  
 PPH2 YDL188C  
 BDH2 YAL061W  
 NUP157 YER105C  
 BAG7 YOR134W  
 HSP150 YJL159W  
 ASG7 YJL170C  
 DUR1,2 YBR208C  
 YBR178W  
 YPL102C  
 MSI1 YBR195C  
 YDR248C  
 CPR4 YCR069W  
 PLB3 YOL011W  
 CRF1 YDR223W  
 YGL114W  
 YPR146C  
 SYN8 YAL014C  
 GPM3 YOL056W  
 ULI1 YFR026C  
 SLX4 YLR135W  
 SUT2 YPR009W  
 YMR013W-A  
 ZRT1 YGL255W  
 PCD1 YLR151C  
 YLR108C  
 YMR160W  
 RNR3 YIL066C  
 FUN26 YAL022C  
 YMR226C  
 YJR056C  
 FRE7 YOL152W  
 MRS3 YJL133W  
 STO1 YMR125W  
 SRX1 YKL086W  
 ATG38 YLR211C  
 ERP1 YAR002C-A  
 PAP2 YOL115W  
 CWP2 YKL096W-A  
 RGD2 YFL047W  
 VBA3 YCL069W  
 POL4 YCR014C  
 APA1 YCL050C  
 NKP2 YLR315W  
 YOR293C-A  
 GMC1 YDR506C  
 YNL205C  
 DOG2 YHR043C  
 YDR476C  
 HEH2 YDR458C  
 PPE1 YHR075C  
 YAR047C  
 ELA1 YNL230C  
 KIN82 YCR091W  
 RME1 YGR044C  
 AAP1 YHR047C  
 PDR16 YNL231C  
 LIF1 YGL090W  
 PMD1 YER132C  
 XKS1 YGR194C  
 BUD2 YKL092C  
 PDP3 YLR455W  
 PFA4 YOL003C  
 YDL114W  
 HXT4 YHR092C  
 FMP16 YDR070C  
 CYB2 YML054C  
 YDL187C  
 YDL162C  
 YLR257W  
 YMR111C  
 PPH21 YDL134C  
 YHL041W  
 YGR176W  
 TRX2 YGR209C  
 DAP1 YPL170W  
 KIP2 YPL155C  
 CRR1 YLR213C

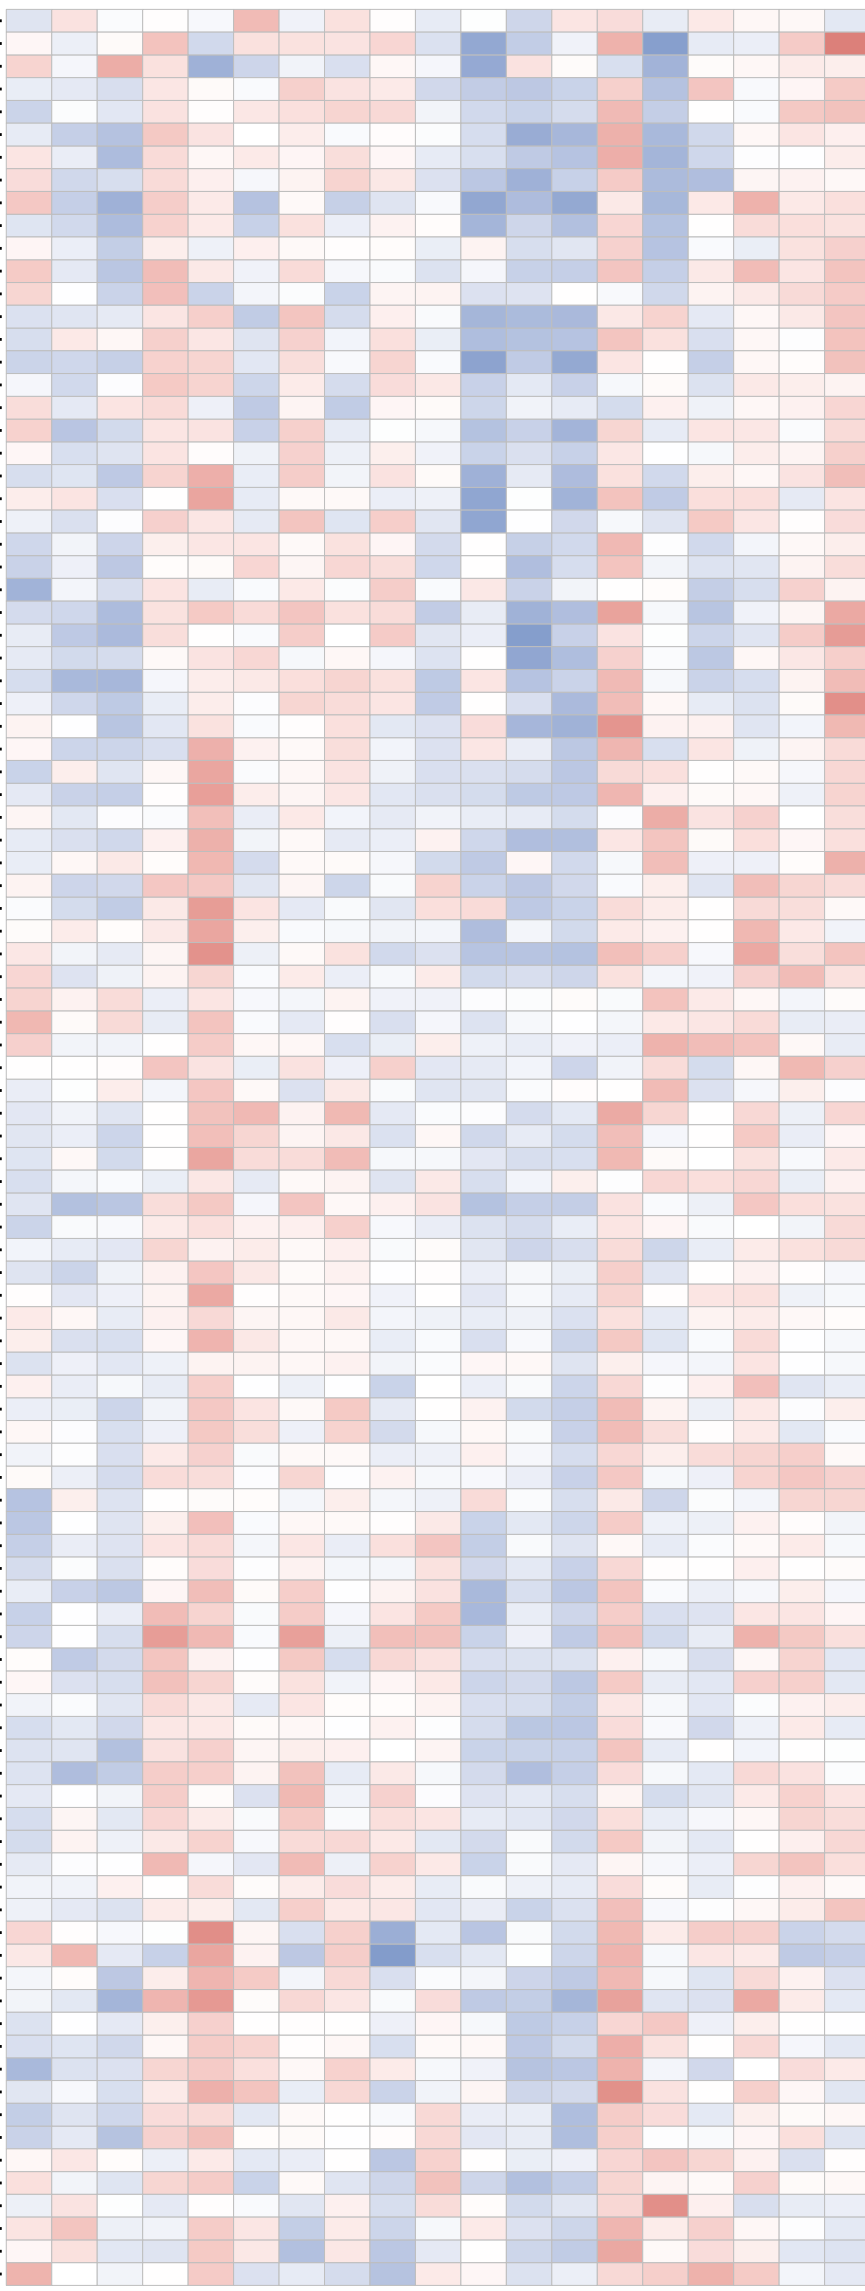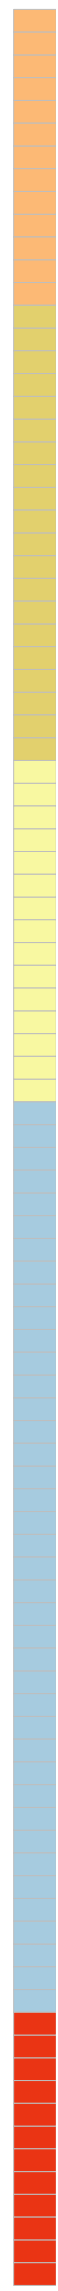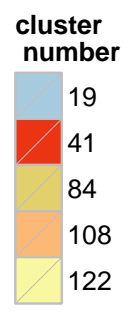

alanine -  
 aspartate -  
 glutamate -  
 phenylalanine -  
 glycine -  
 histidine -  
 isoleucine -  
 lysine -  
 leucine -  
 methionine -  
 asparagine -  
 proline -  
 glutamine -  
 arginine -  
 serine -  
 threonine -  
 valine -  
 tryptophan -  
 tyrosine -  
 cluster -

RLM1 YPL089C  
 YGL260W  
 YGR011W  
 MRPL24 YMR193W  
 NUP53 YMR153W  
 PRM3 YPL192C  
 NCR1 YPL006W  
 YGL132W  
 AVT6 YER119C  
 AFR1 YDR085C  
 NHP6B YBR089C-A  
 RAS2 YNL098C  
 HLR1 YDR528W  
 CLB4 YLR210W  
 SPO13 YHR014W  
 PHD1 YKL043W  
 PAN3 YKL025C  
 SPR1 YOR190W  
 YHR131C  
 ISF1 YMR081C  
 YGR016W  
 YPL067C  
 ALK1 YGL021W  
 HXT10 YFL011W  
 YPL077C  
 MPD2 YOL088C  
 ATG26 YLR189C  
 YJL064W  
 YDR133C  
 OM45 YIL136W  
 OSH3 YHR073W  
 YDR491C  
 YGR026W  
 ADH2 YMR303C  
 VHR1 YIL056W  
 TOG1 YER184C  
 AAC1 YMR056C  
 COX13 YGL191W  
 YOR316C-A  
 AST2 YER101C  
 YGR273C  
 SDT1 YGL224C  
 YPR172W  
 TMN2 YDR107C  
 TMS1 YDR105C  
 GGA2 YHR108W  
 LTP1 YPR073C  
 YOX1 YML027W  
 YPT35 YHR105W  
 DPH2 YKL191W  
 DOG1 YHR044C  
 YOL131W  
 VCX1 YDL128W  
 CLB6 YGR109C  
 CSR1 YLR380W  
 MNL1 YHR204W  
 YPR077C  
 TPK3 YKL166C  
 GPB2 YAL056W  
 ADH6 YMR318C  
 MIC12 YBR262C  
 RTR2 YDR066C  
 HEL2 YDR266C  
 GAS4 YOL132W  
 MDE1 YJR024C  
 GRX4 YER174C  
 IRC15 YPL017C  
 YHR202W  
 YLR415C  
 TEC1 YBR083W  
 PHO92 YDR374C  
 YLR307C-A  
 YMR294W-A  
 MIC10 YCL057C-A  
 YMR310C  
 YOR019W  
 CMK2 YOL016C  
 SFM1 YOR021C  
 AFI1 YOR129C  
 YGR042W  
 TIR4 YOR009W  
 TEX1 YNL253W  
 DSK2 YMR276W  
 FIG2 YCR089W  
 RFX1 YLR176C  
 YLF2 YHL014C  
 YET1 YKL065C  
 STP3 YLR375W  
 PCL8 YPL219W  
 UFD4 YKL010C  
 YMR090W  
 DAL1 YIR027C  
 YMR155W  
 YLR446W  
 BNS1 YGR230W  
 ENT2 YLR206W  
 TFS1 YLR178C  
 RBG1 YAL036C  
 TIM13 YGR181W  
 PET20 YPL159C

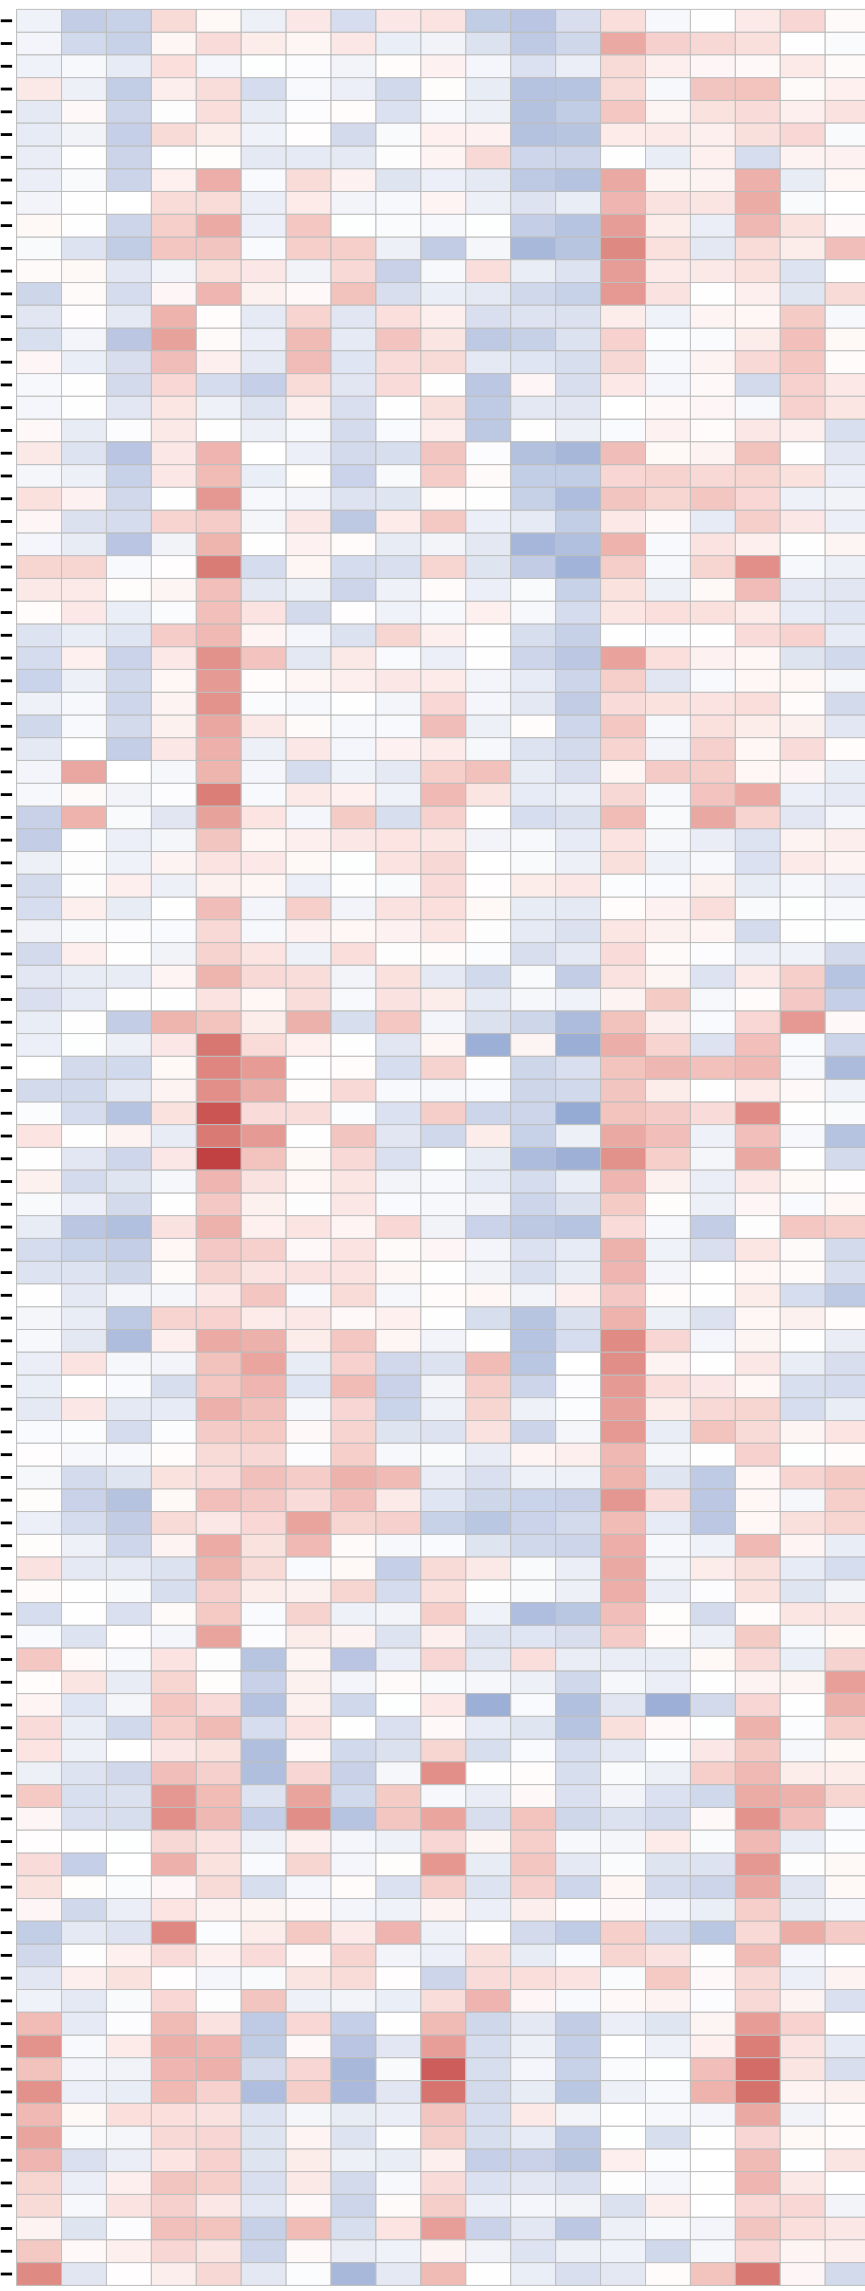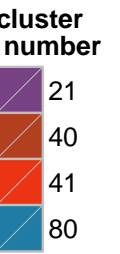

alanine -  
 aspartate -  
 glutamate -  
 phenylalanine -  
 glycine -  
 histidine -  
 isoleucine -  
 lysine -  
 leucine -  
 methionine -  
 asparagine -  
 proline -  
 glutamine -  
 arginine -  
 serine -  
 threonine -  
 valine -  
 tryptophan -  
 tyrosine -  
 cluster -

YMR082C  
 RDL1 YOR285W  
 YGR290W  
 MND2 YIR025W  
 YIR020C  
 RNH1 YMR234W  
 FLO10 YKR102W  
 YPL136W  
 ECM4 YKR076W  
 UIP4 YPL186C  
 REV3 YPL167C  
 OYE3 YPL171C  
 YPL191C  
 ATG1 YGL180W  
 ADH4 YGL256W  
 CWP1 YKL096W  
 YJR115W  
 UGA1 YGR019W  
 YGL140C  
 HYR1 YIR037W  
 YIR035C  
 MLF3 YNL074C  
 TUL1 YKL034W  
 RPL7B YPL198W  
 YOL150C  
 TPK2 YPL203W  
 IME2 YJL106W  
 YBL083C  
 ECM13 YBL043W  
 HMS2 YJR147W  
 PHO87 YCR037C  
 DUS4 YLR405W  
 RGA1 YOR127W  
 YBL086C  
 BLS1 YLR408C  
 SSH4 YKL124W  
 YKL102C  
 YGR066C  
 YHL026C  
 PCL9 YDL179W  
 FMP30 YPL103C  
 YJL213W  
 GTB1 YDR221W  
 TFB6 YOR352W  
 ETP1 YHL010C  
 PST1 YDR055W  
 MLH3 YPL164C  
 MEI5 YPL121C  
 MKK2 YPL140C  
 YPL150W  
 EMC5 YIL027C  
 YML082W  
 PEF1 YGR058W  
 YAR030C  
 YPL113C  
 LMO1 YLL007C  
 YJR154W  
 AFT2 YPL202C  
 YPL182C  
 MDV1 YJL112W  
 EMP70 YLR083C  
 NUT1 YGL151W  
 RKR1 YMR247C  
 AGE1 YDR524C  
 IMD4 YML056C  
 PXA2 YKL188C  
 TIP41 YPR040W  
 TAX4 YJL083W  
 LAS21 YJL062W  
 IOC2 YLR095C  
 FUS1 YCL027W  
 YMR153C-A  
 GLG1 YKR058W  
 VMR1 YHL035C  
 AIM17 YHL021C  
 PAM1 YDR251W  
 PEX34 YCL056C  
 SPS18 YNL204C  
 LIN1 YHR156C  
 ERP5 YHR110W  
 NSG1 YHR133C  
 YGR201C  
 GFD2 YCL036W  
 YPR014C  
 SPO12 YHR152W  
 YHR138C  
 YMR187C  
 REH1 YLR387C  
 TOS8 YGL096W  
 YML083C  
 PDC6 YGR087C  
 YOL118C  
 RRI2 YOL117W  
 SHR5 YOL110W  
 MMM1 YLL006W  
 KTR1 YOR099W  
 PRK1 YIL095W  
 YDR048C  
 MED1 YPR070W  
 PGC1 YPL206C

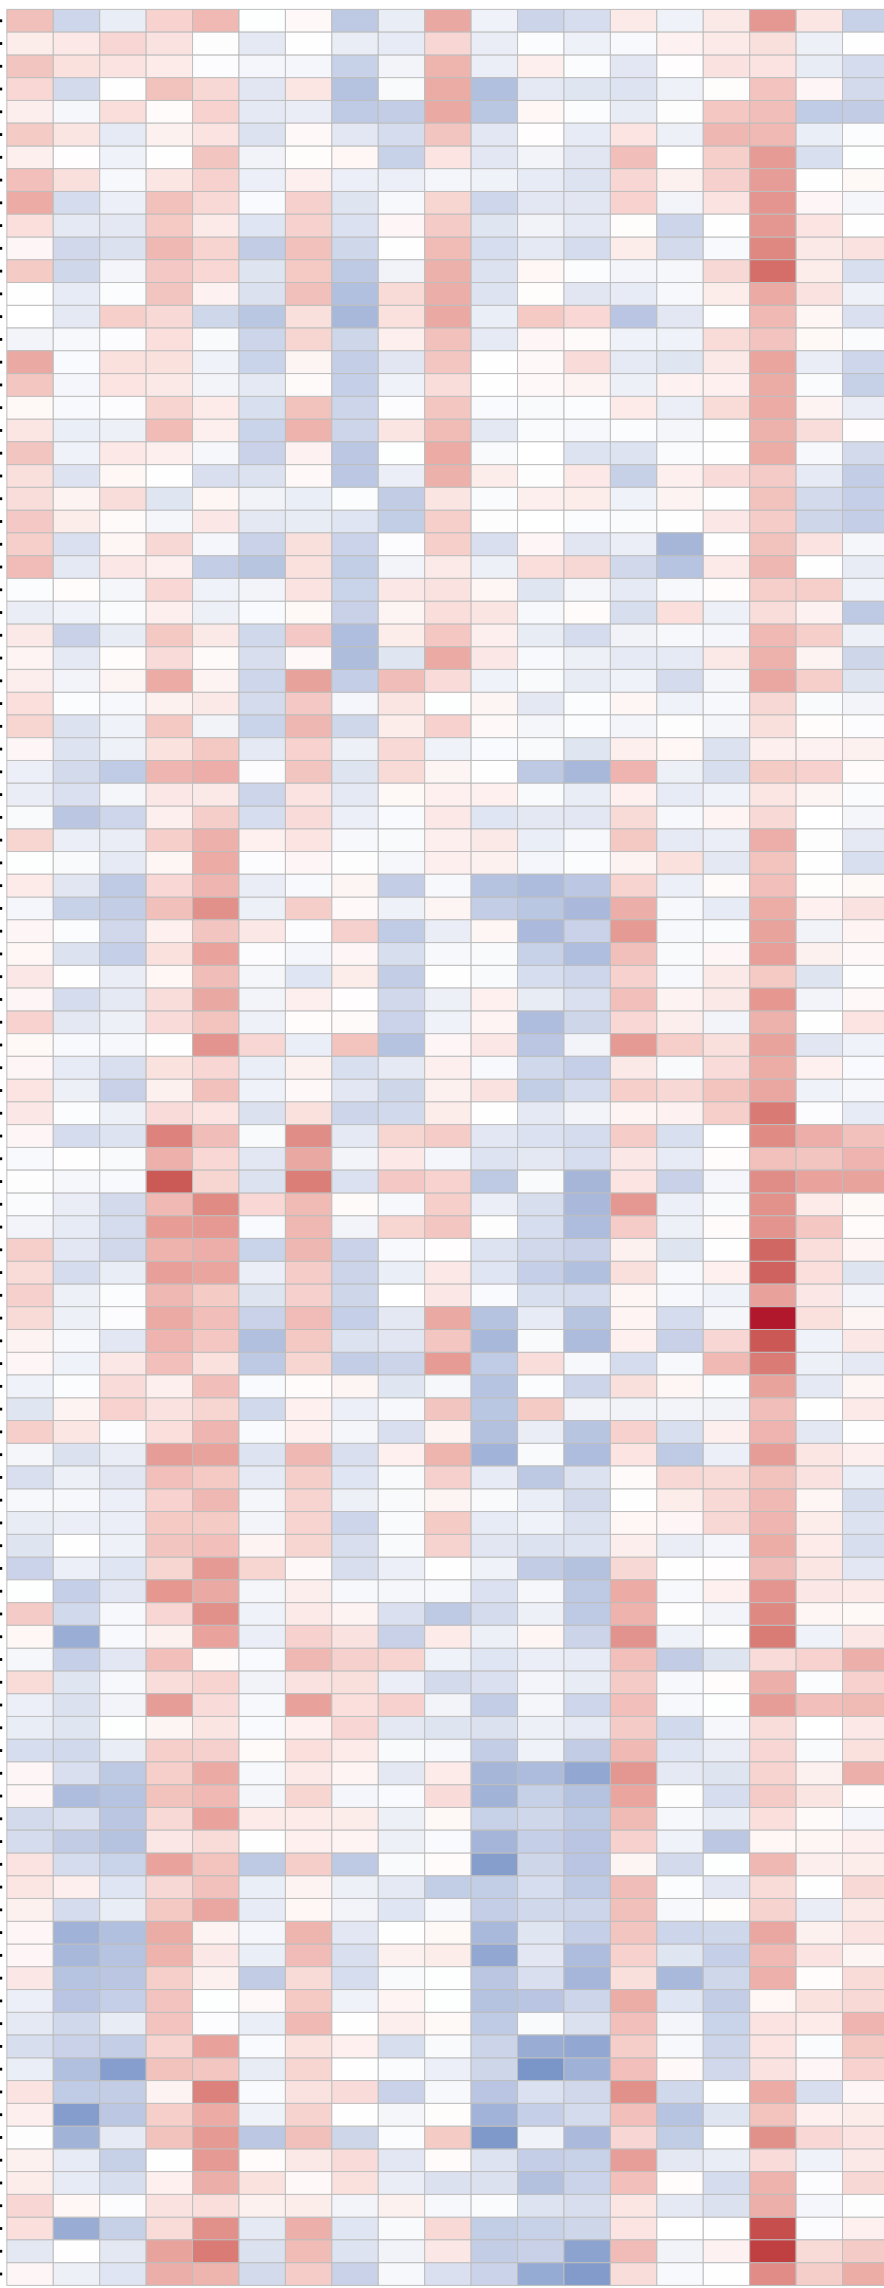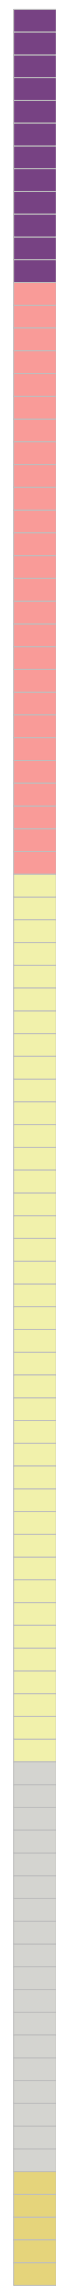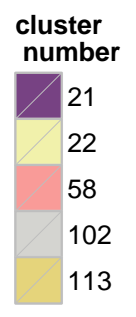

alanine -  
 aspartate -  
 glutamate -  
 phenylalanine -  
 glycine -  
 histidine -  
 isoleucine -  
 lysine -  
 leucine -  
 methionine -  
 asparagine -  
 proline -  
 glutamine -  
 arginine -  
 serine -  
 threonine -  
 valine -  
 tryptophan -  
 tyrosine -  
 cluster -

YDR186C  
 PDE2 YOR360C  
 YPS3 YLR121C  
 PPT2 YPL148C  
 SPR3 YGR059W  
 HXT1 YHR094C  
 APT2 YDR441C  
 LAM4 YHR080C  
 PMC1 YGL006W  
 GDE1 YPL110C  
 YOR093C  
 HTA1 YDR225W  
 HOS3 YPL116W  
 CNL1 YDR357C  
 COS10 YNR075W  
 YLR406C-A  
 YOR062C  
 PET127 YOR017W  
 RGM1 YMR182C  
 SMA2 YML066C  
 NOP13 YNL175C  
 AIM32 YML050W  
 YIM1 YMR152W  
 YDR344C  
 URA10 YMR271C  
 PIG1 YLR273C  
 YDR109C  
 YDR095C  
 DNF1 YER166W  
 URC2 YDR520C  
 PRS2 YER099C  
 SWC7 YLR385C  
 KEL1 YHR158C  
 PAN2 YGL094C  
 YLR363W-A  
 ELO3 YLR372W  
 ENT4 YLL038C  
 HXT3 YDR345C  
 PTK2 YJR059W  
 YJL016W  
 RGL1 YPL066W  
 MRX11 YPL041C  
 PCH2 YBR186W  
 MBA1 YBR185C  
 YLR419W  
 ATG12 YBR217W  
 GDT1 YBR187W  
 LDH1 YBR204C  
 BEM1 YBR200W  
 YBR242W  
 NDJ1 YOL104C  
 YBR219C  
 YBR226C  
 SDS24 YBR214W  
 MET8 YBR213W  
 YMR295C  
 TCD2 YKL027W  
 MEP3 YPR138C  
 SLM6 YBR266C  
 MGR2 YPL098C  
 YBR206W  
 FCY1 YPR062W  
 TSA2 YDR453C  
 SHO1 YER118C  
 AIM7 YDR063W  
 NUR1 YDL089W  
 THI74 YDR438W  
 MAL11 YGR289C  
 IZH4 YOL101C  
 FTR1 YER145C  
 YLR030W  
 HPA2 YPR193C  
 ECM11 YDR446W  
 GPX2 YBR244W  
 DIG2 YDR480W  
 DPB4 YDR121W  
 FMP41 YNL168C  
 SWS2 YNL081C  
 SNG1 YGR197C  
 STE50 YCL032W  
 CNA1 YLR433C  
 CSM2 YIL132C  
 VHS3 YOR054C  
 REG2 YBR050C  
 YOR338W  
 YKL123W  
 YPR170C  
 CSG2 YBR036C  
 SEC22 YLR268W  
 ERV14 YGL054C  
 RER1 YCL001W  
 YOS9 YDR057W  
 YDR056C  
 GYP5 YPL249C  
 IRC8 YJL051W  
 PBI1 YPL272C  
 SSO2 YMR183C  
 UTH1 YKR042W  
 GVP36 YIL041W  
 CLN3 YAL040C

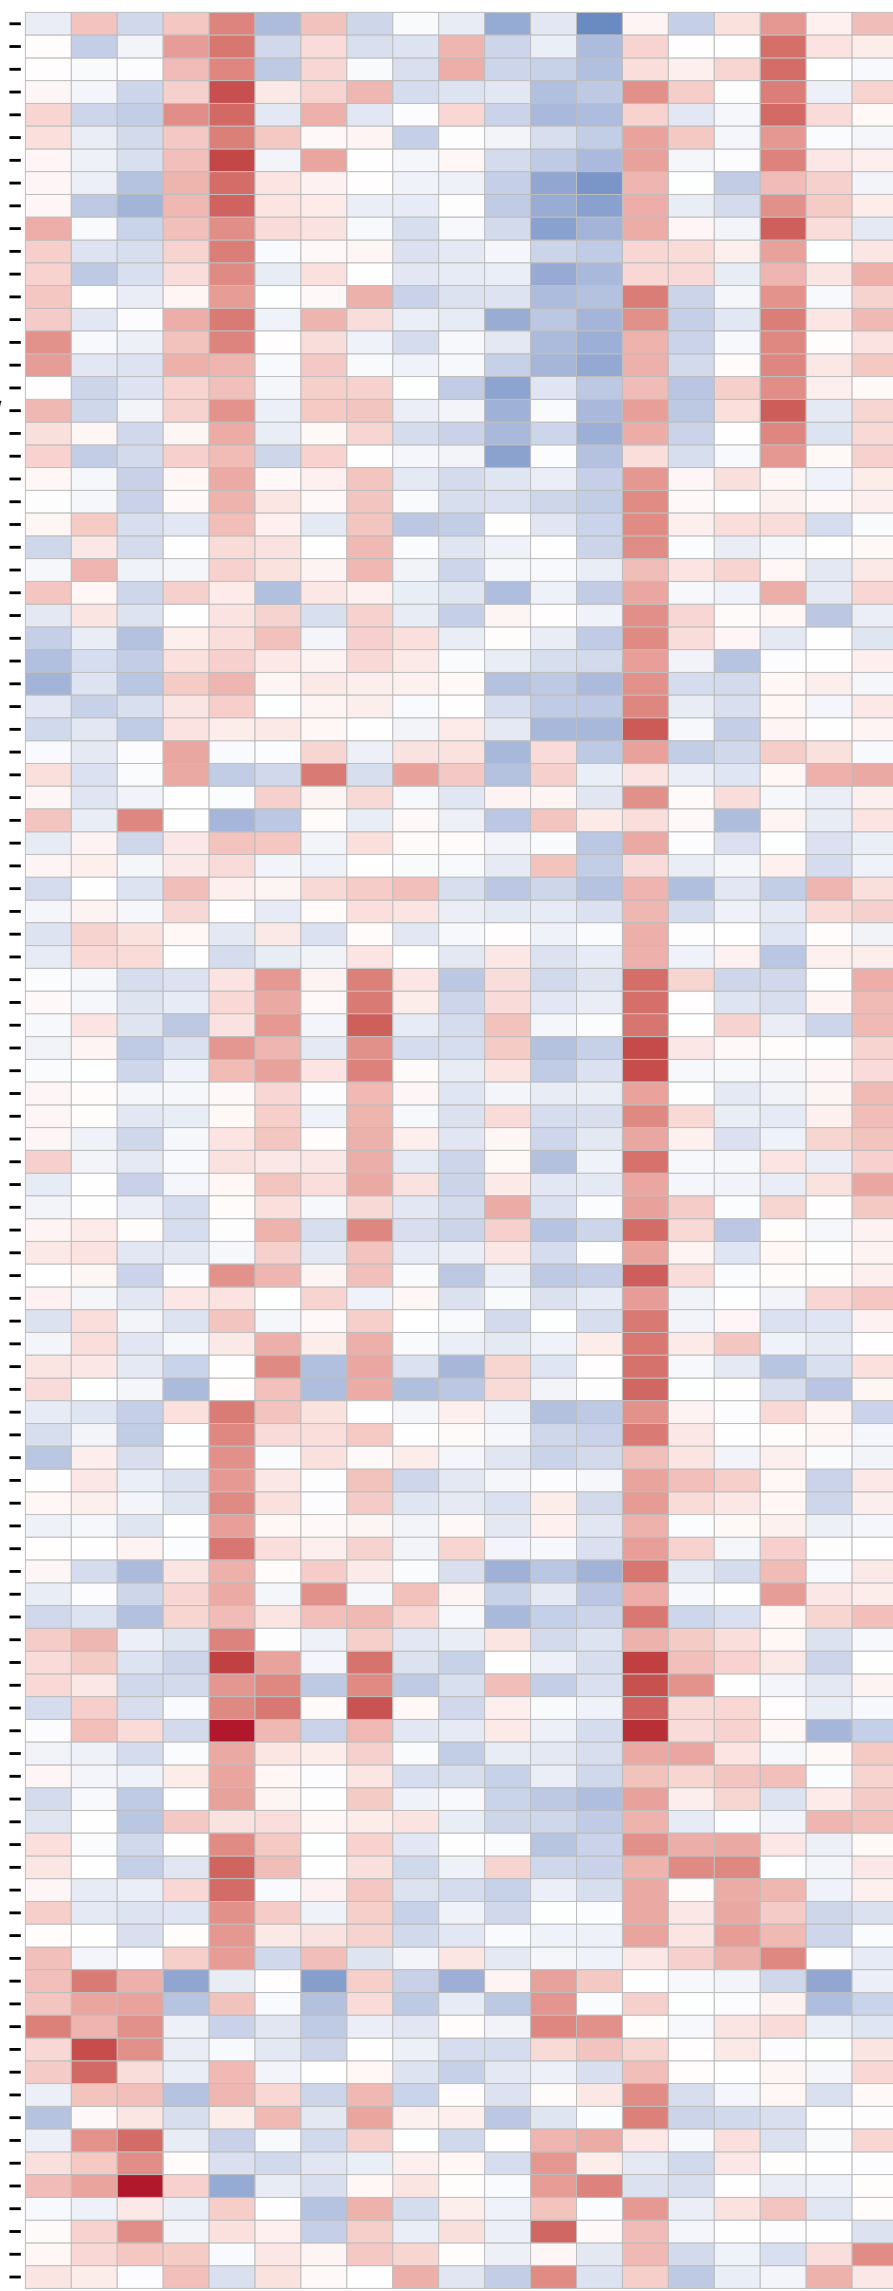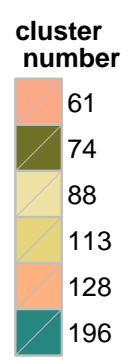

alanine -  
 aspartate -  
 glutamate -  
 phenylalanine -  
 glycine -  
 histidine -  
 isoleucine -  
 lysine -  
 leucine -  
 methionine -  
 asparagine -  
 proline -  
 glutamine -  
 arginine -  
 serine -  
 threonine -  
 valine -  
 tryptophan -  
 tyrosine -  
 cluster -
